# Supplementary material
Source: PubMed Central journal article supplement (PMC10157439)
Supplement: NIHMS1893282-supplement-Supplemental_Information.pdf [file NIHMS1893282-supplement-Supplemental_Information.pdf]

## Supplementary Information

### An Asymmetric $sp^3$ - $sp^3$ Cross-Electrophile Coupling Using 'Ene'-Reductases

Haigen Fu,<sup>1</sup> Jingzhe Cao,<sup>1,2</sup> Tianzhang Qiao,<sup>1</sup> Yuyin Qi,<sup>3</sup> Simon J. Charnock,<sup>3</sup> Samuel Garfinkle,<sup>2</sup> and Todd K. Hyster<sup>1\*</sup>

<sup>1</sup>Department of Chemistry and Chemical Biology, Cornell University, Ithaca, New York 14850, US

<sup>2</sup>Department of Chemistry, Princeton University, Princeton, New Jersey 08544, US

<sup>3</sup>Prozomix. Building 4, West End Ind. Estate, Haltwhistle (UK)

Correspondence to: [thyster@cornell.edu](mailto:thyster@cornell.edu).

## Table of Contents

|                                                                                      |     |
|--------------------------------------------------------------------------------------|-----|
| 1. General information.....                                                          | 3   |
| 2. Detailed experimental procedures.....                                             | 12  |
| Initial panel of ‘ene’-reductases screened for cross-electrophile couplings .....    | 12  |
| Reaction optimization and control experiments.....                                   | 13  |
| Photoenzymatic cross-electrophile couplings of alkyl halides with nitroalkanes ..... | 14  |
| Photoenzymatic reaction of $\alpha$ -chloroamide with nitronone .....                | 46  |
| Derivatization of enzymatic products. ....                                           | 47  |
| Crystal Structure of wild-type CsER and docking .....                                | 50  |
| Deuterium labeling experiments.....                                                  | 54  |
| Spectroscopic experiments.....                                                       | 57  |
| Specific activity of CsER and GluER-T36A for the model reaction. ....                | 62  |
| Synthesis of substrates .....                                                        | 63  |
| Synthesis of reference compounds.....                                                | 71  |
| Density functional theory (DFT) calculations.....                                    | 90  |
| Reduction potential of CsER .....                                                    | 101 |
| 3. NMR spectra.....                                                                  | 102 |
| 4. References .....                                                                  | 177 |

## 1. General information

### General.

Unless otherwise noted, all chemicals and reagents for chemical reactions were obtained from commercial suppliers and used as received (Sigma-Aldrich, Oakwood Chemical, Combi-Blocks, TCI, and VWR). Glucose dehydrogenase GDH-105 (hereafter, GDH; 50 U/mg) was purchased as cell-free lysates from Codexis and were used as received. Silica gel chromatography purifications were carried out using AMD Silica Gel 60.  $^1\text{H}$  and  $^{13}\text{C}$  NMR spectra were recorded on Bruker UltraShield Plus (500 and 126 MHz, respectively) instrument, and are internally referenced to residual proton signals in  $\text{CDCl}_3$  (7.26 ppm).  $^{19}\text{F}$  NMR spectra were recorded on a Bruker 500 (470 MHz) or 400 (367 MHz) instruments.  $^1\text{H}$  NMR data are reported as follows: chemical shift ( $\delta$  ppm), multiplicity (s = singlet, brs = broad singlet, d = doublet, t = triplet, q = quartet, m = multiplet, dd = doublet of doublet, dt = doublet of triplet, ddd = doublet of doublet of doublet), coupling constant (Hz), and integration. Data for  $^{13}\text{C}$  NMR are reported in terms of chemical shift relative to  $\text{CDCl}_3$  (77.16 ppm). High resolution mass spectra (HRMS) were obtained on a Thermo Fisher Scientific DART Mass Spectrometer. IR spectra were recorded on a Bruker Tensor II Infrared Spectrometer and peaks are reported in terms of frequency of absorption ( $\text{cm}^{-1}$ ).

### Chromatography.

Analytical high performance liquid chromatography (HPLC) and Electron Spray Ionization (ESI) mass spectrometry were carried out using an Agilent 1260 Infinity LCMS System. Yields and conversions were determined on a Poroshell C18 column (4.6 x 50 mm, 2.7  $\mu\text{m}$ ) against an internal standard 1,3,5-tribromobenzene (TBB) at 210 nm. Chiral HPLC was conducted using an Agilent 1260 Infinity Chiral HPLC system with isopropanol and hexanes as the mobile phases. Chiral OJ-H, OD-H, and AS-H columns were used to separate enantiomers (4.6 x 250 mm, 5  $\mu\text{m}$ ).

### LED Lamps.

The cyan LEDs lamps were constructed in house from Chanzon High Power 50 W Cyan LED Chips (497 nm/1500 mA/DC30-34 V/50 W, measured photon flux = 12,000  $\text{mM}/\text{m}^2\text{s}$ ) (Amazon 1DGL-JC-50W-490) powered by Mean Well HLG-320H-C1750A power supplies (320 W/183 V/1750 mA). Each LED chip was secured to a Nagulagu cooling aluminum LED heatsink equipped with a 12 V fan (Amazon B01K1Z6VP6).

### Cloning.

**pET22b (+)** was used as a cloning and expression vector for all enzymes described in this study. Genes for all 'ene'-reductases were purchased as gBlocks from IDT and cloned using the Gibson cloning method.<sup>1</sup> All C-terminal 6xHis tagged constructs were cloned directly between the NdeI and XhoI restriction sites. N-terminal 6xHis tagged constructs were created by the introduction of an N-terminal 6xHis sequence directly after the NdeI site and replacement of the C-terminal 6xHis tag with an XhoI cut site. Cloned plasmids were transformed into *E. coli*. DH5- $\alpha$  cells for storage, and *E. coli*. BL21 (DE3) electrocompetent cells for expression.

**Protein and DNA Sequence.**

*Caulobacter segnis* Alkene Reductase (**CsER**).

GenBank accession number: A0A2W5V2R8

CsER protein sequence

MPNLFDPLRVGDLNLPNRVVMAPLTRLRAGPTHIPNALMAEYYGQRASAGLLITEGVPVAPQ  
GVGYAGVPGIWSKEQTEGWKQVTKAVHDKGGRIFMQIWHVGRISDPELLNGELPIAPSAIAA  
KGHVSLLRPQRDYPTPRALSTEEVAGVVEAFRQGAENAQAAGFDGVQLHGANGYLLDQFLQ  
DGSNQRDQYGGSIENRARLLLEAADA AISVWGADR VGVHLAPRADSHSMGDSNLAATFGH  
VAKALGERKIGFVSAREYEAADSLGPLDKKAFGGVYIANEKFDLASANAAIEAGKADAIAFGK  
AYIANPDLVERLKAGAALNTPDPATFYGFENGPRGYTDYPTLAQVREPALEHHHHHHH.

CsER DNA sequence

ATGCCGAATTTGTTTGATCCGCTTCGTGTGGGAGACCTTAATTTGCCTAATCGTGTCTGTA  
TGGCACCCCTGACTCGCTTACGCGCTGGTCTACACACATCCCGAACGCTCTGATGGCAGA  
ATACTATGGGCAGCGTGCAAGTGCAGGCTTACTTATTACGGAGGGAGTTCCAGTGGCGCC  
CCAAGGGGTTGGGTACGCTGGTGTTCCTGGAATTTGGTCCAAGGAACAGACCGAAGGCTG  
GAAGCAAGTCACAAAAGCTGTCCACGACAAGGGCGGCCGCATCTTCATGCAAATCTGGCA  
CGTTGGCCGCATCAGCGACCCGGAGTTGTTAAACGGAGAATTGCCGATTGCGCCAAGTGC  
TATTGCCGCTAAAGGACATGTAAGCCTTTTACGCCCGCAACGCGATTACCCTACCCCCCGT  
GCACTTTCAACCGAGGAGGTGGCAGGAGTAGTCGAAGCCTTCCGTCAGGGTGTGAAAAT  
GCTCAGGCAGCGGGCTTTGACGGGGTCCAGTTGCATGGAGCTAACGGCTACCTTTTGGAT  
CAGTTTTTACAGGACGGGAGTAATCAACGCACGGATCAGTATGGGGGTTTCGATTGAGAAC  
CGTGCCCGCCTGCTGTTGGAGGCAGCCGATGCGGCAATTAGCGTCTGGGGAGCAGATCGC  
GTAGGCGTGCACCTGGCCCCGCTGCGGACTCCCATTCCATGGGTGACTCGAACCTGGCC  
GCGACCTTTGGTCACGTAGCGAAGGCATTAGGGGAGCGCAAGATCGGTTTTTGTACGCGCA  
CGCGAATATGAGGCCGCTGACTCTTTGGGACCGGATTTGAAGAAAGCATTCCGAGGAGTT  
TATATTGCGAATGAGAAATTTGATCTTGCGTCTGCTAACGCCGCTATTGAGGCAGGCAAA  
GCGGATGCCATCGGTTTGGCAAAGCCTACATCGCAAATCCCGATTTAGTGGAACGTCTTA  
AAGCCGGGGCAGCTTTAAACACCCCGGATCCGGCGACTTTCTATGGCTTCGAAAATGGTC  
CTCGCGGTATACGGATTACCCTACCTGGCTCAGGTCCGCGAGCCCGCCCTCGAGCACCA  
CCATCACCACCACTGA.

Old yellow enzyme 2 (**OYE2**) from *Saccharomyces cerevisiae*.

Genbank accession number: AAA83386.1

OYE2 protein sequence

MPFVKDFKPQALGDTNLFKPIKIGNNELLHRAVIPPLTRMRAQHPGNIPNRDWAYEYQAQRAQ  
RPGTLIITEGTFPSPQSGGYDNAPGIWSEEQIKEWTKIFKAIHENKSFQVWVQLWVWGWAFFPDT  
LARDGLRYDSASDNVYMNAEQEEKAKKANNPQHSITKDEIKQYVKEYVQAAKNSIAAGADG  
VEIHSANGYLLNQFLDPHSNNRTDEYGGSIENRARFTLEVVDAVVDAIGPEKVGLRRLSPYGVF  
NSMSGGAETGIVAQYAYVLGELERRAKAGKRLAFVHLVEPRVTNPFLTEGEGEYNGGSNKFAY  
SIWKGPPIRAGNFALHPEVVREEVKDPRTLIGYGRFFISNPDLVDRLEKGLPLNKYDRDRTFYKMS  
AEGYIDYPTYEEALKLGWDKNHHHHHHH.

OYE2 DNA sequence

ATGCCCTTCGTGAAAGACTTCAAACCTCAAGCCCTGGGCGATACTAATTTATTTAAGCCAAT  
TAAAATTGGAAACAATGAGTTGTTACACCGCGCTGTAATTCACCCCTTAACCCGCATGCGCG  
CCCAACATCCAGGGAACATCCCTAATCGCGATTGGGCAGTCGAGTACTATGCTCAGCGTGCT  
CAGCGTCCGGGTACCCTTATCATCACGGAAGGAACGTTTCCGTCGCCGCAATCGGGAGGGT  
ATGACAACGCTCCCGGTATCTGGTCGGAAGAACAGATTAAGAATGGACCAAAAATCTTTAA  
AGCAATTCATGAGAATAAATCTTTCGCCTGGGTCCAACCTTGGGTCTGGGCTGGGCAGCC  
TTCCCTGACACATTGGCGCGTGACGGGCTTCGTTATGATAGTGCTTCGGATAACGTGTATATG  
AATGCTGAACAAGAAGAAAAGGCAAAAAAAGCAAACAATCCACAGCATTGACTACTAAA  
GACGAGATTAAGCAGTATGTTAAGGAATACGTACAAGCAGCAAAGAATTCTATTGCCGCAG  
GGGCGGACGGGGTAGAAATCCACTCTGCTAATGGGTACTTGCTTAACCAGTTCCTGGACCC  
GCATTCAAACAACCGCACTGATGAGTACGGAGGGTCCATCGAAAATCGTGACGTTTTACT  
TTAGAGGTCGTAGATGCTGTAGTCGACGCGATTGGCCCTGAGAAGGTAGGTTTGCCTTAA  
GTCCTTATGGCGTGTTCAATTCAATGTCAGGGGGCGCTGAAACAGGTATCGTCGCGCAGTA  
CGCATACTCTTGGGAGAGCTGGAGCGTCGTGCTAAGGCTGGCAAGCGTTTAGCTTTTGTG  
CATTTAGTTGAACCGCGCGTGACAAACCCCTTCTTGACGGAAGGCGAAGGAGAGTATAACG  
GAGGATCGAATAAATTTGCGTATTCATTGGAAGGGCCCGATCATTGCGTCCGGTAACTTTG  
CCTTACATCCCGAAGTTGTTTCGCGAGGAAGTAAAAGACCCACGTACCTTGATCGGGTATGG  
CCGTTTCTTTATTTCAAACCCCGACTTGGTGGATCGCCTTGAAAAAGGTCTTCCCTTGAATA  
AGTATGACCGTGATACGTTCTACAAAATGTCAGCCGAAGGTTACATCGACTACCCACCTAC  
GAAGAGGCTTTGAAACTTGGTTGGGACAAGAACCACCACCATCACCACCACTGA.

12-Oxophytodienoate reductase 1 (**OPR1**) from *Solanum lycopersicum*.

Genbank accession number: NP\_001234781.1

OPR1 protein sequence

MENKVVEEKQVDKIPLMSPCKMGKFELCHRVV LAPLTRQRSYGYIPQHAILHYSQRSTNGGL  
LIGEATVISETGIGYKDVPGIWTK EQVEAWKPIVDAVHAKGGIFFCQIWHVGRVSNKDFQPNGE  
DPISCTDRGLTPQIRSNGLDIAHFTRPRRLTTDEIPQIVNEFRVAARNAIEAGFDGVEIHGAHG YLI  
DQFMKDQVNDRSDKYGGSLNRCRFALEIVEAVANEIGSDRVGIRISPF AHYNEAGDTNPTALG  
LYMVESLNKYDLAYCHVVEPRMKTAWEKIECTESLVP MRKAYKGT FIVAGGYDREDGNRALI  
EDRADLVAYGRLFISNPDLPKRFELNAPLNKYNRDTFYTSDPIVGYTDY PPLETMTLEHHHHHHH.

OPR1 DNA sequence

ATGGAGAATAAAGTTGTGGAGGAGAAACAAGTCGATAAAATCCCCTTGATGTCACCGTGCA  
AGATGGGAAAGTTTGAAC TTTGCCACCGTGTTGTCCTGGCTCCGCTGACACGGCAACGCTC  
CTACGGGTATATACCGCAGCCCCATGCAATCTTAC TACTCTCAGCGTTCAACCAACGGAG  
GGCTGTTGATAGGTGAAGCAACAGTCATTAGCGAAACGGGTATAGGCTATAAGGACGTACC  
CGGCATCTGGACTAAAGAACAAGTTGAGGCATGAAACCCATAGTAGACGCCGTACATGCAA  
AGGGAGGGATCTTCTTCTGCCAGATATGGCATGTGGGTAGAGTGAGTAATAAGGACTTCCA  
ACCTAACGGTGAGGATCCCATAGCTGTACCGATCGGGGATTAACGCCACAGATACGGTCA  
AATGGTATTGACATAGCTCATTTTACAAGACCTAGACGTCTTACCACGGACGAGATCCCACA  
AATTGTCAACGAATCCGCGTGGCGGCTAGAAATGCCATCGAAGCAGGATTTCGACGGCGTA  
GAGATACACGGAGCACACGGTTATCTGATAGACCAGTTCATGAAAGACCAAGTTAATGACC  
GGTCCGATAAGTATGGAGGATCTCTGGAAAACCGGTGTCGGTTCGCCTTGGAGATTGTTGA  
AGCCGTCGCTAATGAAATCGGAAGCGACCGTGTCGGAATACGCATTAGTCCATTCGCGCAC  
TACAATGAGGCAGGGGATACCAATCCCACTGCGCTGGGTTTATATATGGTGGAGAGCCTGAA  
TAAATACGATTTAGCATATTGTCATGTAGTGGAACCTCGCATGAAAAC TGCTTGGGAAAAAA  
TTGAATGCACTGAGAGTCTTGTTCCGATGCGTAAAGCGTACAAGGGAACGTTTCATAGTAGC  
TGGGGGTTATGATCGGGAGGACGGGAACGGGCCCTGATAGAAGACCGGGCCGACCTTGTC  
GCATACGGACGTTTGTTCATATCCAACCCAGATTTACCGAAACGTTTTGAGTTAAACGCTCC  
CCTGAATAAATAACAATCGTGACACGTTCTATACTTCTGATCCAATCGTGGGTTATACGGACTA  
TCCGTTTTTAGAGACGATGACGCTCGAGCACCACCACCACCACCTGA.

Morphinone reductase (**MorB**) from *Pseudomonas putida*.

Genbank accession number: AAC43569

MorB protein sequence

MPDTSFSNPGLFTPLQLGSLSPNRVIMAPLTRSRTPDSVPGRLQQIYYGQRASAGLIISEATNISP  
TARGYVYTPGIWTD AQEAGWKGVVEAVHAKGGRIALQLWHVGRVSHELVQPDGQQPVAPSA  
LKAEGAECFVEFEDGTAGLHPTSTPRALETDEIPGIVEDYRQAAQRAKRAFDMVEVHAANA  
CLPNQFLATGTNRRTDQYGGSIENRARFPLEVVDAAVEVFGPERVGIRLTPFLELFGLTDDPEA  
MAFYLAGELDRRGLAYLHFNPDWIGGDITYPEGFREQMRQRFKGGLIYCGNYDAGRAQARL  
DDNTADAVAFGRPFIANPDLPERFRLGAALNEPDPSTFYGGAEVGYTDYPFLDNGHDLRGLHHH  
HHH.

MorB DNA sequence

ATGCCCGACACTTCTTTTTCGAATCCAGGACTTTTTACTCCTCTTCAGTTGGGTAGTCTGTCT  
CTTCCAAATCGTGT CATAATGGCACCTTTAACCCGCTCACGCACGCCAGATTCTGTACCTGG  
ACGCCTTCAACAGATATACTATGGTCAACGCGCCAGCGCCGGGTTAATCATCTCCGAAGCGA  
CAAATATCAGTCCCACCGCTCGGGGATACGTATACACGCCAGGCATTTGGACTGACGCTCAG  
GAGGCCGGTTGGAAAGGTGTGGTCTGAAGCTGTCCATGCTAAAGGGGGTCGTATAGCGTTGC  
AGTTATGGCATGTGCGCCGGGTCTCTCATGAGCTGGTGCAGCCAGACGGCCAACAACCCGT  
GGCACCATCCGCCTTAAAAGCCGAAGGGGCGAGTGCTTTGTCTGAATTCGAGGATGGGACT  
GCTGGCCTGCACCCTACGTCAACTCCCAGAGCCCTGGAGACAGATGAGATAACCCGGTATTG  
TTGAAGATTACAGACAGGCCGCGCAGCGTGC GAAGCGGGCCGGATTCGATATGGTAGAGGT  
CCACGCGGCAAATGCTTGTCTTCTAATCAGTTCTTGGCGACAGGAACCAATCGTCGCACA  
GACCAGTACGGTGGATCAATTGAGAACCGGGCTAGATTCCCATTAGAGGTTGTTCGATGCTG  
TAGCCGAGGTATTCGGGCCCGAAAGAGTGGGGATACGGCTGACTCCTTTCCTGGAGTTATTT  
GGATTAACGGATGATGAACCCGAGGCAATGGCTTTTTACCTTGC GGGAGAATTAGACCGGC  
GTGGTTTAGCGTATTTACACTTTAATGAACCCGATTGGATAGGTGGGGACATCACGTACCCG  
GAAGGGTTTCGTGAGCAAATGCGTCAACGGTTCAAGGGGGGGCTTATATATTGTGGAAACT  
ACGACGCAGGTCGGGCCCAAGCCCGGCTTGACGACAATACAGCAGATGCAGTGGCGTTTG  
GGCGTCCATTTATTGCCAACCCCGACTTGCCAGAACGTTTCCGCTTAGGAGCAGCGCTGAA  
CGAACCTGACCCCTCTACTTTTTACGGCGGGGCAGAGGTGGGGTACACAGACTACCCGTTT  
CTGGACAACGGTCATGACCGCCTGGGACTCGAGCACCACCATCACCACCACTGA.

*Gluconobacter oxydans* enoate reductase (**GluER**) from *Gluconobacter oxydans* 621H.

Genbank accession number: AAW60280

GluER protein sequence

MHHHHHHPTLFDPIDFGPIHAKNRIVMSPLTRGRADKEAVPTPIMAEYYAQRASAGLIITEATGI  
SREGLGWPFAPGIWSDAQVEAWKPIVAGVHAKGGKIVCQLWHMGRMVHSSVTGTQPVSSSAT  
TAPGEVHTYEGKKPFEQARAIDAADISRILNDYENAARNAIRAGFDGVQIHAANGYLIDEFLRN  
GTNHRTDEYGGVPENRIRFLKEVTERVIAAIGADRTGVRLSPNGDTQGCIDSAPETVVFVPAAKL  
LQDLGVAWLELREPGPNGTFGKTDQPKLSPQIRKVFLRPLVLNQDYTFEAAQTALAEKDAI  
AFGRKFISNPDLPERFARGIALQPDDMKTWYSQGPEGYTDYPSATSGPN.

GluER DNA sequence

ATGCACCACCATCACCACCACCCGACCCTTTTCGACCCCATCGATTTTCGGACCTATCCACGC  
CAAGAATCGTATCGTCATGTCCCCCTGACTCGCGGTCGCGCTGACAAAGAGGCGGTTCCA  
ACCCCATATGGCTGAATACTACGCCAACGCGCTTCGGCGGGTTTAATTACTACTGAAGC  
GACGGGGATTCACGCGAAGGCTTAGGTTGGCCGTTTTCGCGCCGGAATTTGGTCCGATGCA  
CAGGTTGAGGCGTGAAACCTATCGTCGCGGGTGTCCATGCAAAGGGCGGCAAGATCGTAT  
GTCAGCTTTGGCATATGGGCCGTATGGTACATTCTTCAGTTACAGGGACGCAGCCCGTAAGC  
AGTTCGCCACTACTGCTCCAGGTGAGGTTACACCTATGAGGGCAAGAAGCCCTTCGAAC  
AAGCGCGTGCAATCGATGCTGCAGACATCTCCCGCATCCTTAACGATTACGAAAATGCAGC  
ACGTAATGCAATCCGCGCGGGTTTTCGATGGAGTGCAGATCCACGCAGCCAATGGCTACCTT  
ATCGATGAGTTTTTTCGTAACGGAACCAATCATCGCACCGATGAGTATGGGGGGGTGCCGG  
AGAACCGTATTCGTTTCTTGAAAGAGGTAACAGAACGCGTCATCGCGGCGATTGGCGCTGA  
CCGTACGGGTGTGCGTCTGAGTCCAAACGGTGACACACAGGGTTGTATCGACAGTGCTCCC  
GAAACCGTTTTTGTTCCTGCCGCAAAGCTTTTGCAAGATTTAGGGGTAGCGTGGCTTGAGC  
TGCGTGAACCTGGTCCGAATGGTACGTTTGAAAGACGGATCAACCAAATTATCTCCACA  
AATCCGTAAGGTATTCCTTCGTCCATTGGTCTTAAATCAAGACTATACTTTTGAGGCGGCAC  
AGACGGCCCTGGCTGAGGGCAAGGCGGACGCTATTGCGTTTTGGCCGTAAGTTCATTTCAA  
TCCAGACTTGCTGAGCGCTTTGCCCGTGGCATCGCACTGCAACCAGACGATATGAAAACA  
TGGTACTCCCAAGGCCAGAGGGTTACACAGACTATCCATCCGCAACTTCTGGGCCGAAC  
TGA.



Nicotinamide-dependent cyclohexanone reductase (**NCR**) from *Zymomonas mobilis*.

GenBank accession number: AAV90509.

NCR protein sequence

MPSLFDPIRFGAFTAKNRIWMAPLTRGRATRDHVPTEIMAEYYAQRASAGLIISEATGISQEGLG  
WPYAPGIWSDAQVEAWLPITQAVHDAGGLIFAQLWHMGRMVPSNVSGMQPVAPSASQAPGLG  
HTYDGGKKPYDVARALRLDEIPRLDDYEKAARHALKAGFDGVQIHAANGYLIDEFIRDSTNHR  
HDEYGGAVENRIRLLKDVTERVIATIGKERTAVRLSPNGEIQGTVDSHPEQVFIPAAMLSLDLI  
AFLGMREGAVDGTFGKTDQPKLSPEIRKVFKPPLVLNQDYTFETAQAALDSGVADAISFGRPFI  
GNPDLPRRFEEKAPLTKDVIETWYTQTPKGYTDYPLLGDHHHHHHH.

NCR DNA sequence

ATGCCGTCACTGTTTCGATCCAATCCGCTTTGGGGCTTTCACTGCAAAAAATCGTATCTGGAT  
GGCGCCGTTAACACGGGGTTCGGGCAACCCGTGACCATGTCCCAACAGAGATAATGGCTGA  
ATACTATGCCCAACGCGCATCCGCGGGCTTGATCATCAGCGAGGCGACCGGGATCAGCCAA  
GAGGGCCTGGGCTGGCCCTATGCACCAGGAATCTGGAGTGATGCGCAGGTTCGAGGCATGG  
TTACCATAACCCAAGCGGTACACGATGCCGGAGTTTGTATTTGCACAACCTGTGGCACAT  
GGGGCGTATGGTGCCTTCCAACGTTTCTGGAATGCAACCTGTCGCACCTAGCGCTTCACAA  
GCGCCCCGGCTTGGGCCATACTTATGATGGCAAAAAGCCATACGATGTAGCCAGAGCATTGA  
GACTTGACGAGATCCCACGGCTGCTGGACGACTATGAAAAGGCAGCTCGGCACGCACTGA  
AAGCTGGGTTTCGATGGAGTTCAGATTCATGCTGCCAACGGATACCTGATTGACGAGTTCATC  
CGGGATTCAACAAATCATAGACACGACGAATACGGGGGGGCGGTTGAGAACAGAATACGG  
TTATTGAAGGATGTCACTGAGCGGGTTATCGCAACCATCGGAAAGGAGCGCACAGCAGTGC  
GTTTAAGTCCGAATGGAGAGATAACAAGGCACAGTAGACTCGCATCCAGAACAGGTATTTAT  
CCCGGCTGCAAAGATGTTATCTGATTTAGATATCGCGTTCCTTGGGATGCGCGAGGGTGCTG  
TAGACGGGACATTTGGCAAAACAGACCAGCCCAAACCTTTCGCCCCGAGATCCGTAAAGTTTT  
CAAGCCACCCCTTGTTCTGAATCAAGATTACACTTTCGAGACTGCCCAGGCTGCGTTAGATT  
CGGGTGTAGCCGATGCAATCAGTTTTGGTCGTCCATTCATTGGGAATCCCGACTTACCGAGA  
AGATTCTTTGAAAAGGCACCGTTAACTAAGGACGTAATTGAGACTTGGTACACTCAGACTC  
CCAAAGGTTACACCGACTATCCACTGTTAGGTGATCTCGAGCACCACCATCACCACCACTG  
A.

NADH-dependent flavin oxidoreductase from *Lactocaseibacillus paracasei* (**LacER**).

GenBank accession number: WP\_013246060.1

LacER protein sequence

MSGYHFLKPFTFKHQITITLKNRIVIPPMTTRLSFEDGTVTRDEIRYYQQRAGGVGMFITGTANV  
NALGKGFEGELSVADDRFIPGLSKLAAAMKTGGTKAILQIFSAGRMSNSKILRGEQPVSASAVA  
APRAGYETPRALTSAEIEATIHDFGQAVRRAILAGFDGIELHGANTYLIQQFYSPNSNRRTDEWG  
GDRDKRMRFLAVVHEAEKVIATIADRPFLGYRISPEELEQPGITLDDTLALIDALKQTKIDYL  
HVSQSDVWRTSLRNPEDTAIMNEQIRDHVAGAFPVIVVGGIKTPADAEKAAESFDLVAIGHEMI  
REPHWVQKVLHDHEKAIRYQIAPADLEELGIAPTFLDFIESISGGAKGVPLTTAQSVTSSNVTQD  
LEHHHHHH.

LacER DNA sequence

ATGTCGGGCTACCACTTCCTGAAGCCATTTACTTTTAAGCACCAAACCTATAACGCTTAAAAA  
CCGCATCGTCATTCCACCCATGACTACGAGACTTTCCTTCGAGGATGGTACAGTTACCAGAG  
ACGAGATTAGATACTATCAGCAACGGGCGGGTGGCGTCCGGTATGTTTATAACTGGTACTGCA  
AACGTCAACGCTCTTGGAAGGCTTTGAAGGAGAATTATCGGTTCGCGGACGATCGGTTCA  
TTCCGGGCTTGAGCAAATTGGCTGCAGCCATGAAGACTGGAGGGACCAAGGCTATTCTGCA  
GATCTTTTCTGCCGGTTCGCATGTCTAACAGCAAATCTTGAGAGGGGAACAACCCGTGTCTG  
GCATCAGCTGTGGCGGGCCAAAGAGCCGGGTACGAAACACCTCGGGCGTTGACATCGGCT  
GAGATCGAAGCCACGATCCACGACTTTGGGCAAGCTGTCCGTAGAGCAATCTTGGCGGGCT  
TCGATGGGATAGAATTGCATGGCGCCAATACATATTTGATCCAGCAATTTTATCCCCTAACA  
GCAACCGGCGTACCGATGAATGGGGAGGGGATAGAGACAAACGCATGCGGTTTTCCCTTAGC  
AGTGGTCCACGAGGCTGAAAAGGTGATAGCAACCATCGCGGATCGCCCTTTCCTGCTTGGG  
TATCGGATCTCTCTGAAGAACTGGAGCAACCGGGGATAACTCTTGATGACACTCTGGCCTT  
AATTGACGCTCTGAAACAAACGAAGATCGATTATTTACACGTTTCCCAGTCAGATGTCTGGA  
GAACTTCACTGCGTAACCCCGAGGATACAGCTATTATGAATGAGCAAATCCGTGATCATGTC  
GCAGGCGCCTTCCCAGTTATCGTAGTAGGAGGAATCAAGACTCCAGCCGACGCTGAGAAA  
GCTGCGGAATCTTTTGATTTAGTTGCTATAGGTTCATGAAATGATACGTGAGCCTCACTGGGTT  
CAAAAAGTACTGGACCACS8GACGAAAAGGCTATCCGTTATCAAATTGCACCGGCGGACTT  
GGAAGAACTGGGCATCGCCCCTACGTTTTTATGATTTTATCGAGAGCATCTCTGGTGGAGCCA  
AGGGGGTGCCCTTGACGACGGCGCAGTCGGTCACTAGCAGTAACGTACACAAGACCTCG  
AGCACCACCATCACCACCACTGA.

### **CsER Protein Expression and Purification.**

*Caulobacter segnis* Alkene Reductase (CsER) was produced in *E. coli* BL21 with a plasmid encoding CsER. Transformed glycerol stocks were used to initiate a 5 mL overnight culture in Luria-Bertani (LB) media with ampicillin (100 µg/mL) at 37 °C and 250 rpm. Expression culture (500 mL in a 2 L baffled shake flask) containing ampicillin (100 µg/mL) was inoculated with 5 mL of the overnight culture and grown until the culture reached an OD<sub>600</sub> of 0.5-0.7 (37 °C, 250 rpm). Flasks were chilled on ice and protein expression was induced with 0.1 mM IPTG (25 °C, 24 h, 250 rpm). The cells were harvested by centrifugation (4000 x g, 20 min, 4 °C) and frozen at -20 °C for further purification.

Frozen cells were thawed on ice and resuspended in buffer A (20 mM KPi pH 7.0, 300 mM NaCl, 25 mM imidazole) to a final concentration of 2 mL/g of wet cells. The resuspended cells were supplemented with lysozyme (1 mg/mL), FMN (1 mg/mL), DNase I (0.1 mg/mL), phenylmethylsulfonyl fluoride (PMSF, 1 mM) and allowed to shake for 30 min at 25 °C. The cells were further disrupted by sonication (2 x 4 min, output control 5, 35% duty cycle, Sonicator QSonica Q500 Ultra Sonicator). Lysates were centrifuged (20,000 x g, 1 h, 4 °C) to pellet insoluble materials. Proteins were purified using a nickel-NTA column (5 mL HisTrap HP, GE Healthcare, Piscataway, NJ) via an AKTASTart purifier FPLC system (GE Healthcare). Enzymes were eluted with buffer B (20 mM KPi pH 7.0, 300 mM NaCl, 250 mM imidazole) over five column volumes. Yellow fractions containing CsER enzymes were pooled, concentrated, and subjected to three buffer exchanges into an imidazole-free storage buffer (100 mM KPi pH 8.0). Concentrated enzymes were aliquoted, flash-frozen in liquid N<sub>2</sub>, and then stored at -20 °C until later use. Protein purity was assessed with SDS-PAGE.

Protein concentrations were determined using the extinction coefficient (12.2 x mM<sup>-1</sup> cm<sup>-1</sup> at 446 nm) for free FMN released after protein denaturation. Extinction coefficient for CsER:  $\epsilon = 10.2 \times \text{mM}^{-1} \text{cm}^{-1}$  at 466 nm.

The detailed protein expression and purification of other tested 'ene'-reductases in this study, including old yellow enzyme 2 (OYE2), 12-oxophytodienoate reductase 1 (OPR1), morphinone reductase (MorB), *Gluconobacter oxydans* enoate reductase (GluER), Nicotinamide-dependent cyclohexanone reductase from *Zymomonas mobilis* (NCR), and NADH-dependent flavin oxidoreductase from *Lacticaseibacillus paracasei* (LacER), were reported elsewhere.<sup>2-4</sup>

## 2. Detailed experimental procedures

**Supplementary Table 1.** Initial panel of ‘ene’-reductases screened for cross-electrophile couplings.

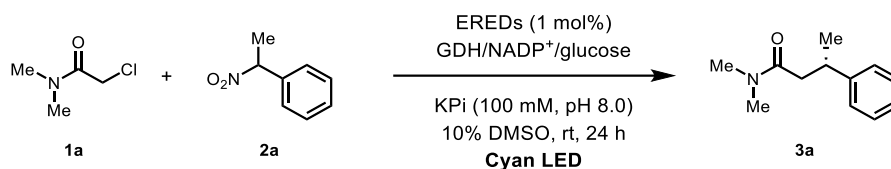

| Entry | ‘Ene’-reductases | Light    | Yield of <b>3a</b> <sup>a</sup> | er <sup>b</sup>   |
|-------|------------------|----------|---------------------------------|-------------------|
| 1     | MorB             | Cyan     | 20%                             | 80:20             |
| 2     | GluER-T36A       | Cyan     | 13%                             | 11:89             |
| 3     | CsER             | Cyan     | 28%                             | 95:5              |
| 4     | NCR              | Cyan     | 11%                             | 13:87             |
| 5     | OYE2             | Cyan     | 0%                              | n.d. <sup>c</sup> |
| 6     | OPR1             | Cyan     | 2%                              | n.d.              |
| 7     | LacER            | Cyan     | 7%                              | 46:54             |
| 8     | CsER             | No light | 0%                              | n.d.              |
| 9     | No enzyme        | Cyan     | 0%                              | n.d.              |

Reaction conditions:  $\alpha$ -chloroamide (**1a**, 1.2 mg, 10  $\mu$ mol, 2 equiv), 1-nitroethylbenzene (**2a**, 0.76 mg, 5  $\mu$ mol, 1 equiv), GDH (0.3 mg), NADP<sup>+</sup> (0.05  $\mu$ mol, 1 mol%), glucose (25  $\mu$ mol) and purified ‘ene’-reductases (0.05  $\mu$ mol, 1 mol% based on nitroalkane) in KPi buffer (100 mM, pH 8.0), with 10% DMSO as cosolvent, final total volume is 500  $\mu$ L. Reaction mixtures were irradiated with cyan LEDs under anaerobic conditions at room temperature for 24 h. <sup>a</sup> Yield (average of duplicate) determined *via* LCMS relative to an internal standard (TBB). <sup>b</sup> Enantiomeric ratio (er, *S*:*R*) determined by HPLC on a chiral stationary phase. <sup>c</sup> n.d., not determined.

**Supplementary Table 2.** Reaction optimization and control experiments.

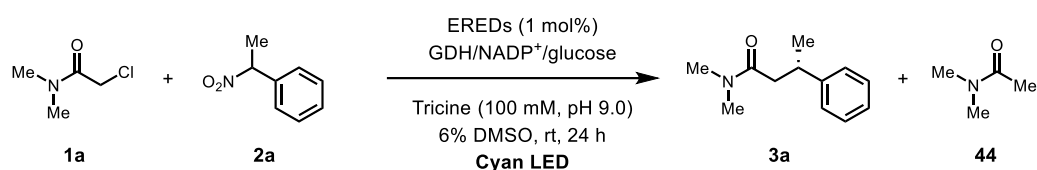

| Entry | 'Ene'-reductases             | Light    | Yield of <b>3a</b> <sup>a</sup> | er <sup>b</sup> | Yield of <b>44</b> <sup>c</sup> |
|-------|------------------------------|----------|---------------------------------|-----------------|---------------------------------|
| 1     | MorB                         | Cyan     | 23%                             | 83:17           | 13%                             |
| 2     | GluER-T36A                   | Cyan     | 51%                             | 10:90           | 9%                              |
| 3     | CsER                         | Cyan     | 92%                             | 95:5            | 15%                             |
| 4     | NCR                          | Cyan     | 39%                             | 10:90           | 8%                              |
| 5     | OYE2                         | Cyan     | 0%                              | n.d.            | 3%                              |
| 6     | OPR1                         | Cyan     | 3%                              | n.d.            | n.d.                            |
| 7     | LacER                        | Cyan     | 15%                             | 46:54           | 23%                             |
| 8     | CsER                         | 456 nm   | 33%                             | 91:9            | 6%                              |
| 9     | CsER                         | 390 nm   | 20%                             | 90:10           | 6%                              |
| 10    | CsER                         | No light | 0%                              | n.d.            | 0%                              |
| 11    | No enzyme                    | Cyan     | 0%                              | n.d.            | 0%                              |
| 12    | CsER without turnover system | Cyan     | 11%                             | 92:8            | 4%                              |

Reaction conditions:  $\alpha$ -chloroamide (**1a**, 1.2 mg, 10  $\mu$ mol, 2 equiv), 1-nitroethylbenzene (**2a**, 0.76 mg, 5  $\mu$ mol, 1 equiv), GDH (0.3 mg), NADP<sup>+</sup> (0.05  $\mu$ mol, 1 mol%), glucose (25  $\mu$ mol) and purified 'ene'-reductases (0.05  $\mu$ mol, 1 mol% based on nitroalkane) in Tricine buffer (100 mM, pH 9.0), with 6% DMSO as cosolvent, final total volume is 800  $\mu$ L. Reaction mixtures were irradiated with cyan LEDs under anaerobic conditions at room temperature for 24 h. <sup>a</sup> Yield (average of duplicate) of **3a** (based on nitroalkane **2a**) determined *via* LCMS relative to an internal standard (TBB). <sup>b</sup> Enantiomeric ratio (er, *S*:*R*) determined by HPLC on a chiral stationary phase. <sup>c</sup> Yield (average of duplicate) of **44** based on  $\alpha$ -chloroamide **1a**.

## Photoenzymatic cross-electrophile couplings of alkyl halides with nitroalkanes

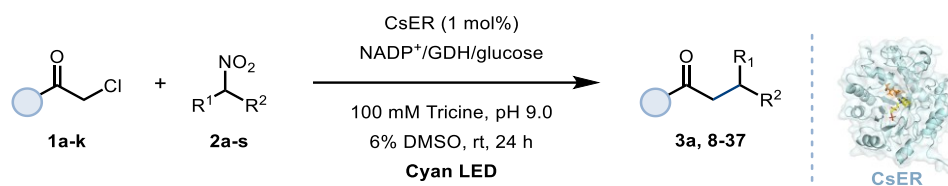

### General procedure 1.

In the Coy<sup>®</sup> chamber (Vinyl Anaerobic Chamber, Type A), a 1 dram shell vial (15 x 45 mm, Fisherbrand<sup>®</sup> 03-339-26B) was charged with GDH (100  $\mu$ L, 3 mg/mL stock solution in 100 mM Tricine buffer pH 9.0), glucose (100  $\mu$ L, 45 mg/mL stock solution in 100 mM Tricine buffer pH 9.0), NADP<sup>+</sup> (9.2  $\mu$ L, 5 mg/mL stock solution in 100 mM Tricine buffer pH 9.0, 1 mol%), CsER wild-type protein (1 mol% based on nitroalkane),  $\alpha$ -chloroamide (25  $\mu$ L, 400 mM stock in DMSO, 10  $\mu$ mol, 2 equiv) and nitroalkane (25  $\mu$ L, 200 mM stock in DMSO, 5  $\mu$ mol, 1 equiv). Tricine buffer (100 mM pH 9.0) was added to bring the total volume to 800  $\mu$ L with 6% DMSO (*v/v*) as cosolvent. The vial was sealed with a rubber septum and brought out of the Coy<sup>®</sup> chamber where it is placed on a stir plate at 200 rpm under a fan and irradiated with cyan LEDs for 24 hours (reaction setup see Supplementary Fig. 1A). The reaction mixture was placed approximately 10 cm away from the single light source (energy output 31.0 mW/cm<sup>2</sup>). Upon completion, the reaction was quenched with 1.6 mL of acetonitrile and 50  $\mu$ L of 2 mg/mL 1,3,5-tribromobenzene (TBB) in acetonitrile as the internal standard. The mixture was shaken for 30 min, centrifuged (12000 x g, 5 mins), and the supernatant was filtered and retained for LCMS analysis for yield calculation. After LCMS analysis, the supernatant was concentrated under reduced pressure, extracted with EtOAc, the combined organic layers were dried over Na<sub>2</sub>SO<sub>4</sub>, filtered, and concentrated under reduced pressure. The resulting crude residue was dissolved in 10% isopropanol/hexanes (*v/v*) for chiral HPLC analysis.

Note: The tested  $\alpha$ -chloroamide,  $\alpha$ -chloroketone,  $\alpha$ -bromoester and nitroalkane substrates are stable at room temperature (store at 4-degree fridge), we observed hydrolyzed products for  $\alpha$ -bromoesters after enzymatic reaction. All substrate stock solutions were freshly prepared using degassed DMSO in the Coy<sup>®</sup> chamber before setup of reactions.

### General procedure 2 for preparative scale reaction.

In the Coy<sup>®</sup> chamber (Vinyl Anaerobic Chamber, Type A), a 20 mL glass vial with screw cap was charged with GDH (2 mL, 3 mg/mL stock solution in 100 mM Tricine buffer pH 9.0), glucose (2 mL, 45 mg/mL stock solution in 100 mM Tricine buffer pH 9.0), NADP<sup>+</sup> (184  $\mu$ L, 5 mg/mL stock solution in 100 mM Tricine buffer pH 9.0), CsER wild-type protein (1 mol% based on nitroalkane),  $\alpha$ -chloroamide (500  $\mu$ L, 400 mM stock in DMSO, 0.20 mmol, 2 equiv) and nitroalkane (500  $\mu$ L, 200 mM stock in DMSO, 0.10 mmol, 1 equiv). Tricine buffer (100 mM pH 9.0) was added to bring the total volume to 16 mL with 6% DMSO (*v/v*) as cosolvent. The vial was sealed with a screw cap and brought out of the Coy<sup>®</sup> chamber where it is placed on a stir plate at 200 rpm under a fan and irradiated with cyan LEDs for 24 hours (reaction setup see Supplementary Fig. 1B). The reaction mixture was placed

approximately 10 cm away from the dual light source (energy output around 62.0 mW/cm<sup>2</sup>). Upon completion, the reaction was quenched with 32 mL of acetonitrile. The mixture was shaken for 30 min, centrifuged (12000 x g, 5 mins), and the supernatant was filtered, concentrated, and extracted with DCM (3 x 10 mL). The combined organic layers were dried over Na<sub>2</sub>SO<sub>4</sub>, filtered, and concentrated under reduced pressure to provide the crude product, which was purified by preparative TLC (EtOAc/Hexanes, 50%, v/v).

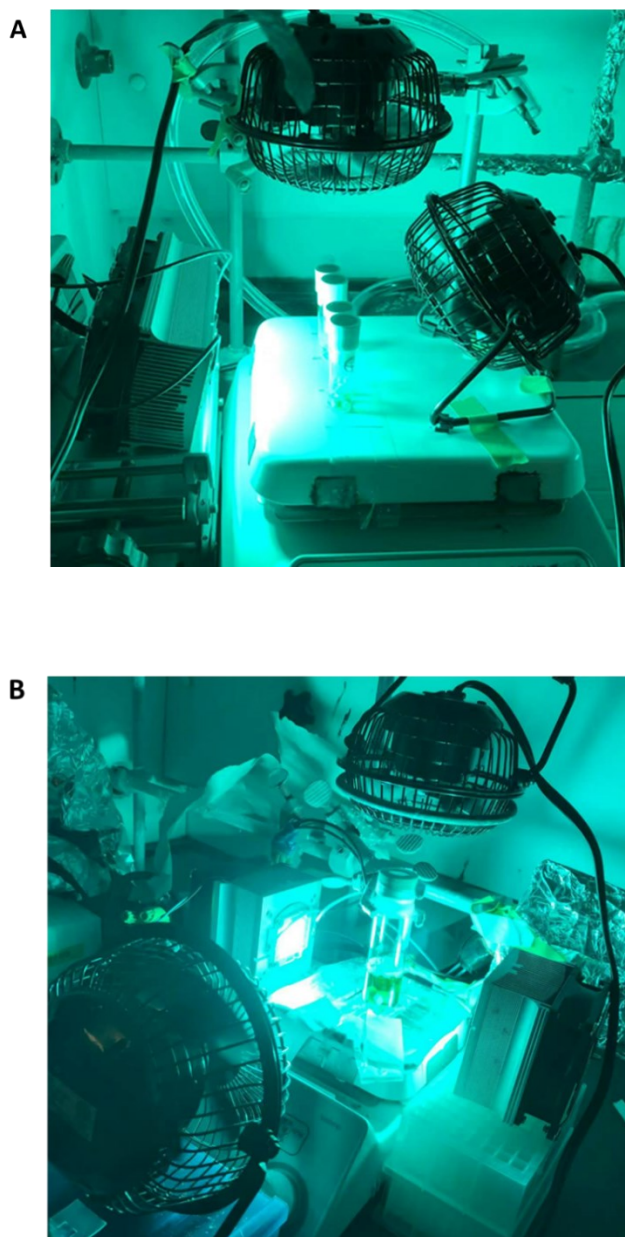

**Supplementary Fig. 1.** (A) Reaction light setup for general procedure 1. (B) Reaction light setup for general procedure 2.

(*S*)-*N,N*-Dimethyl-3-phenylbutanamide (**3a**)

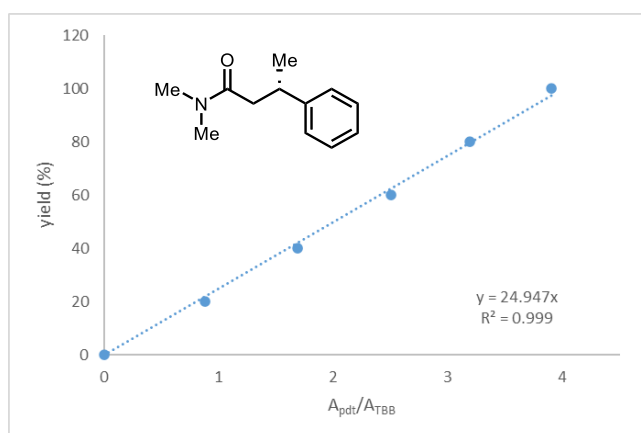

Prepared according to the general procedure 1 using  $\alpha$ -chloro-*N,N*-dimethylacetamide (**1a**, 10  $\mu\text{mol}$ , 2 equiv) and 1-nitroethylbenzene (**2a**, 5  $\mu\text{mol}$ , 1 equiv) catalyzed by CsER (1 mol%).

**Yields:** run 1: 94%, run 2: 90%, average yield 92%.

Preparative enzymatic synthesis was conducted according to the general procedure 2 using  $\alpha$ -chloro-*N,N*-dimethylacetamide (**1a**, 0.20 mmol, 2 equiv) and 1-nitroethylbenzene (**2a**, 0.10 mmol, 1 equiv) catalyzed by CsER (1 mol%). Isolated yield: 74% (clear oil, 14 mg).

**Enantioselectivity:** 95:5 er. Chiral HPLC method: OD-H column, 210 nm, 5% isopropanol/n-heptane, flow rate 0.5 mL/min, room temperature,  $t_{\text{R}}$  (major) = 20.64 min,  $t_{\text{R}}$  (minor) = 23.38 min. **Absolute configuration** of the enzymatic product **3a** is assigned as *S* by comparison with the previously reported chiral HPLC data.<sup>5</sup>

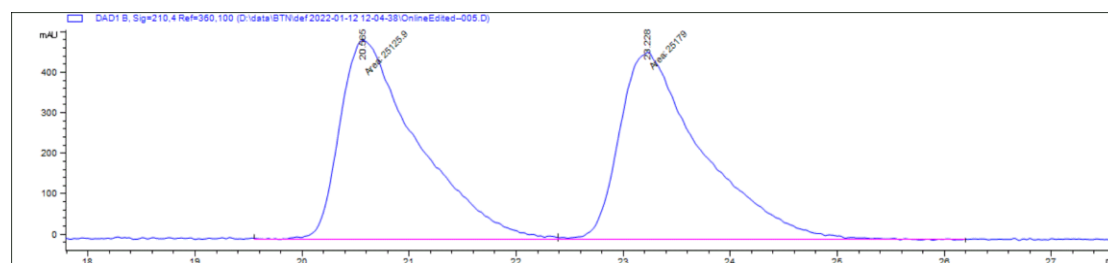

| # | Time   | Type | Area    | Height | Width  | Area%  | Symmetry |
|---|--------|------|---------|--------|--------|--------|----------|
| 1 | 20.565 | MF   | 24870.6 | 492.3  | 0.842  | 50.080 | 0.421    |
| 2 | 23.228 | FM   | 24791   | 462.8  | 0.8928 | 49.920 | 0.518    |

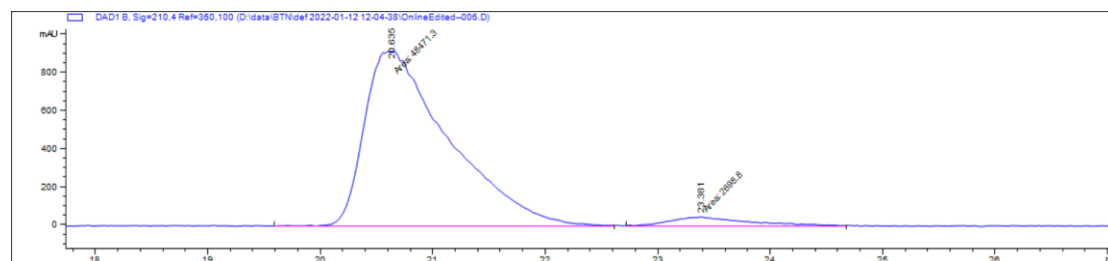

| # | Time   | Type | Area    | Height | Width  | Area%  | Symmetry |
|---|--------|------|---------|--------|--------|--------|----------|
| 1 | 20.635 | MM   | 48471.3 | 921.5  | 0.8767 | 94.726 | 0.475    |
| 2 | 23.381 | MM   | 2698.8  | 51.2   | 0.8777 | 5.274  | 0.617    |



(*S*)-3-(2-Fluorophenyl)-*N,N*-dimethylbutanamide (**8**)

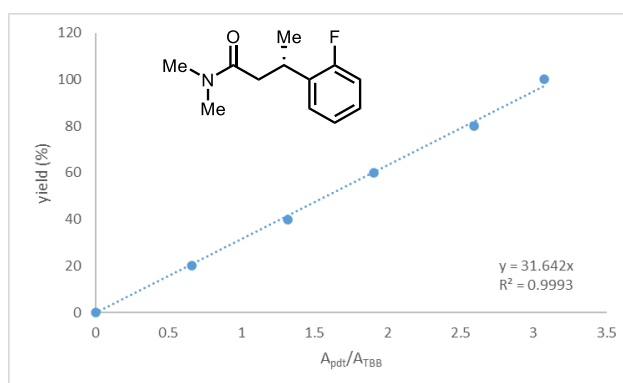

Prepared according to the general procedure 1 using  $\alpha$ -chloro-*N,N*-dimethylacetamide (**1a**, 10  $\mu$ mol, 2 equiv) and 1-fluoro-2-(1-nitroethyl)benzene (**2b**, 5  $\mu$ mol, 1 equiv) catalyzed by CsER (1 mol%).

**Yields:** run 1: 28%, run 2: 29%, average yield 28%.

**Enantioselectivity:** 94:6 er. Chiral HPLC method: OD-H column, 210 nm, 1% isopropanol/hexanes, flow rate 1.0 mL/min, room temperature,  $t_R$  (major) = 23.99 min,  $t_R$  (minor) = 26.80 min.

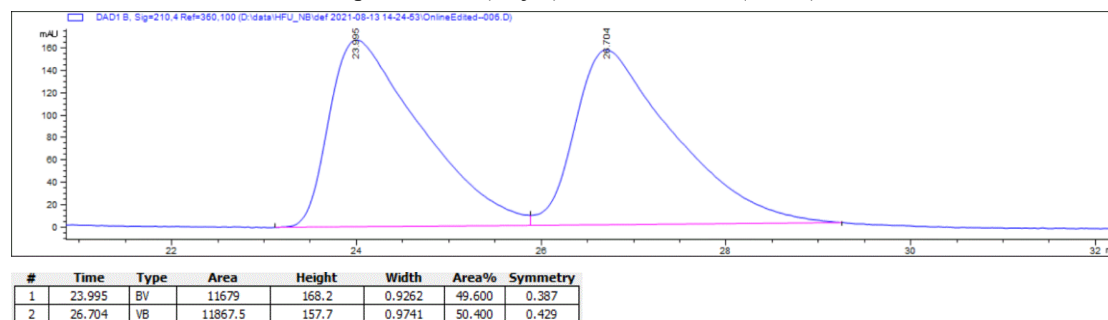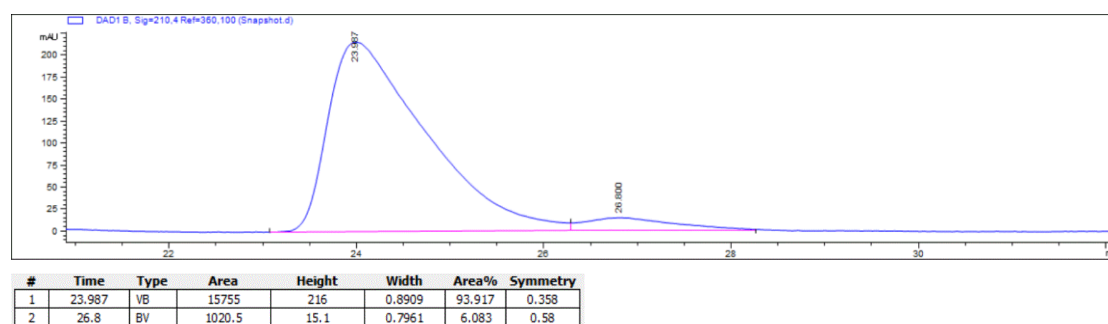

(*S*)-3-(3-Fluorophenyl)-*N,N*-dimethylbutanamide (**9**)

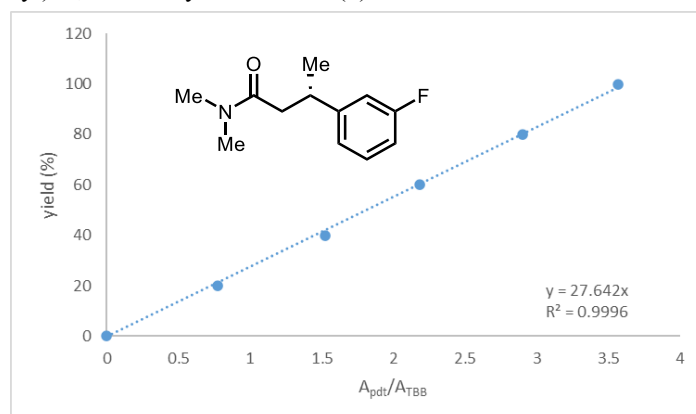

Prepared according to the general procedure 1 using  $\alpha$ -chloro-*N,N*-dimethylacetamide (**1a**, 10  $\mu\text{mol}$ , 2 equiv) and 1-fluoro-3-(1-nitroethyl)benzene (**2c**, 5  $\mu\text{mol}$ , 1 equiv) catalyzed by CsER (1 mol%).

**Yields:** run 1: 93%, run 2: 94%, average yield 93%.

**Enantioselectivity:** 99:1 er. Chiral HPLC method: OD-H column, 210 nm, 2% isopropanol/hexanes, flow rate 1.0 mL/min, room temperature,  $t_{\text{R}}$  (major) = 16.37 min,  $t_{\text{R}}$  (minor) = 18.63 min.

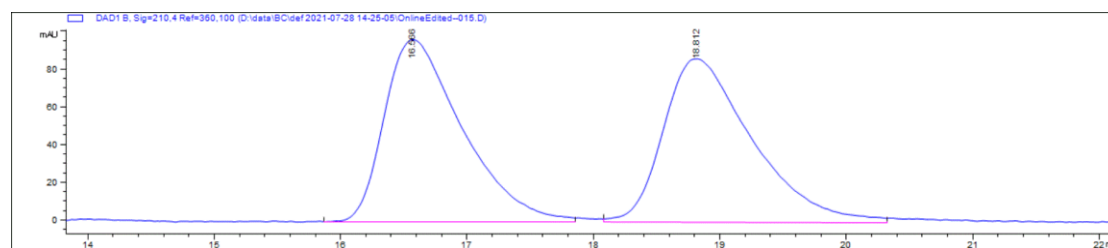

| # | Time   | Type | Area   | Height | Width  | Area%  | Symmetry |
|---|--------|------|--------|--------|--------|--------|----------|
| 1 | 16.566 | VV   | 4184.1 | 97     | 0.5935 | 49.355 | 0.54     |
| 2 | 18.812 | BB   | 4293.5 | 87.2   | 0.5907 | 50.645 | 0.592    |

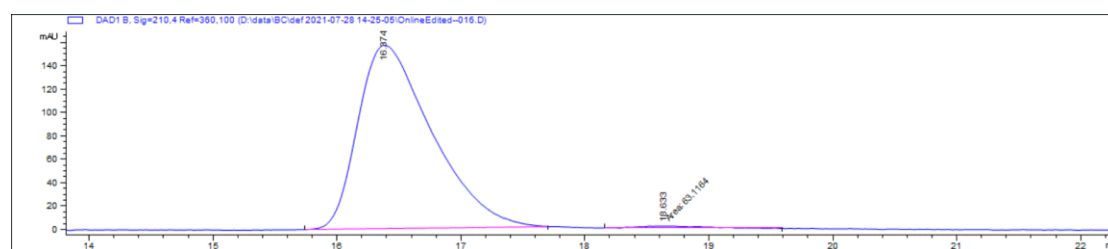

| # | Time   | Type | Area   | Height | Width  | Area%  | Symmetry |
|---|--------|------|--------|--------|--------|--------|----------|
| 1 | 16.374 | BB   | 6515.5 | 156.8  | 0.6027 | 99.041 | 0.526    |
| 2 | 18.633 | MM   | 63.1   | 1.7    | 0.6266 | 0.959  | 0.546    |

(*S*)-*N,N*-Dimethyl-3-(*m*-tolyl)butanamide (**10**)

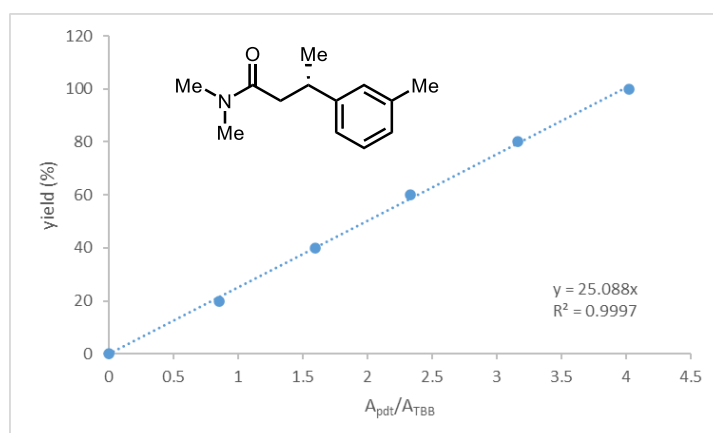

Prepared according to the general procedure 1 using  $\alpha$ -chloro-*N,N*-dimethylacetamide (**1a**, 10  $\mu$ mol, 2 equiv) and 1-methyl-3-(1-nitroethyl)benzene (**2d**, 5  $\mu$ mol, 1 equiv) catalyzed by CsER (1 mol%).

**Yields:** run 1: 89%, run 2: 81%, average yield 85%.

**Enantioselectivity:** 98:2 er. Chiral HPLC method: OD-H column, 210 nm, 5% isopropanol/hexanes, flow rate 1.0 mL/min, room temperature,  $t_R$  (major) = 9.02 min,  $t_R$  (minor) = 10.99 min.

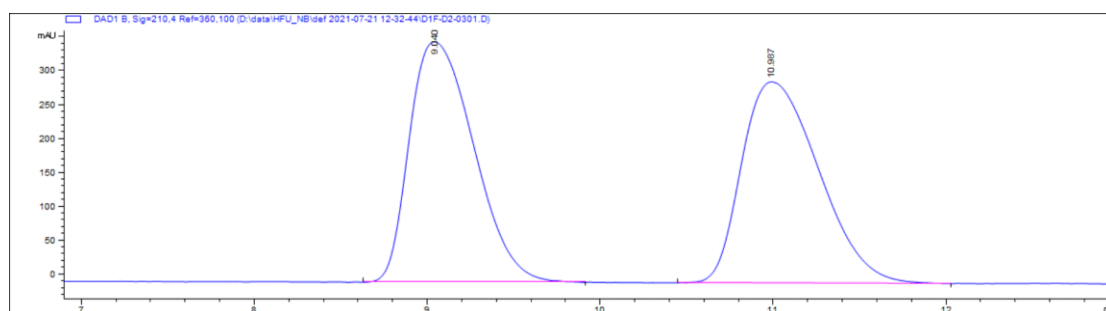

| # | Time   | Type | Area   | Height | Width  | Area%  | Symmetry |
|---|--------|------|--------|--------|--------|--------|----------|
| 1 | 9.04   | VB   | 9143.6 | 353.1  | 0.4101 | 49.961 | 0.606    |
| 2 | 10.987 | BV   | 9157.8 | 295.5  | 0.4916 | 50.039 | 0.601    |

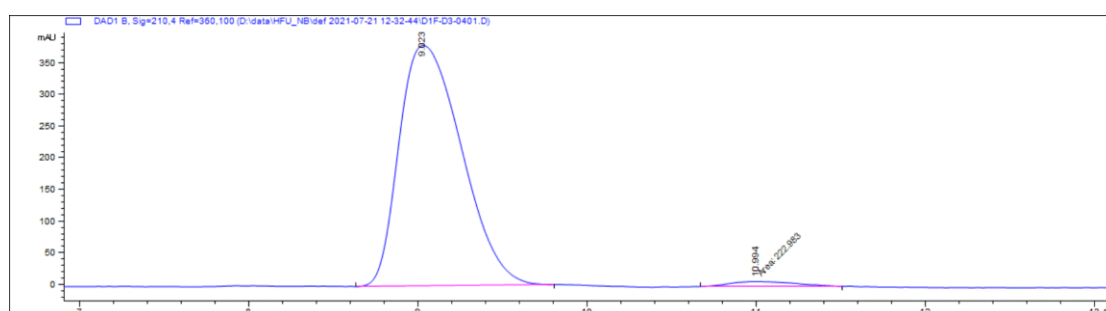

| # | Time   | Type | Area   | Height | Width  | Area%  | Symmetry |
|---|--------|------|--------|--------|--------|--------|----------|
| 1 | 9.023  | VB   | 9806.1 | 382.3  | 0.4133 | 97.777 | 0.595    |
| 2 | 10.994 | MM   | 223    | 8.1    | 0.4615 | 2.223  | 0.655    |

(S)-3-(3-Methoxyphenyl)-N,N-dimethylbutanamide (**11**)

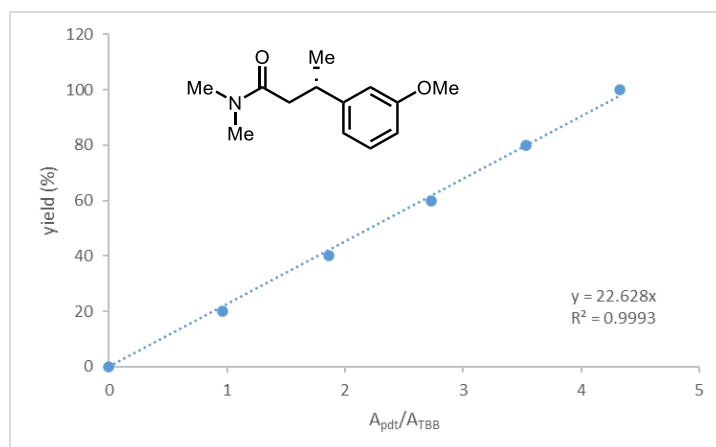

Prepared according to the general procedure 1 using  $\alpha$ -chloro-N,N-dimethylacetamide (**1a**, 10  $\mu$ mol, 2 equiv) and 1-methoxy-3-(1-nitroethyl)benzene (**2e**, 5  $\mu$ mol, 1 equiv) catalyzed by CsER (1 mol%).

**Yields:** run 1: 82%, run 2: 78%, average yield 80%.

**Enantioselectivity:** 99:1 er. Chiral HPLC method: OD-H column, 210 nm, 5% isopropanol/hexanes, flow rate 1.0 mL/min, room temperature,  $t_R$  (major) = 14.69 min,  $t_R$  (minor) = 16.88 min.

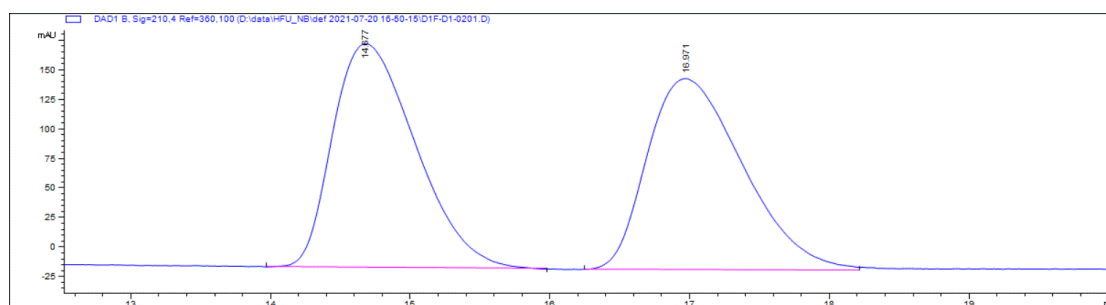

| # | Time   | Type | Area   | Height | Width  | Area%  | Symmetry |
|---|--------|------|--------|--------|--------|--------|----------|
| 1 | 14.677 | VB   | 7871.3 | 190.5  | 0.588  | 50.312 | 0.627    |
| 2 | 16.971 | BV   | 7773.5 | 162.6  | 0.6897 | 49.688 | 0.637    |

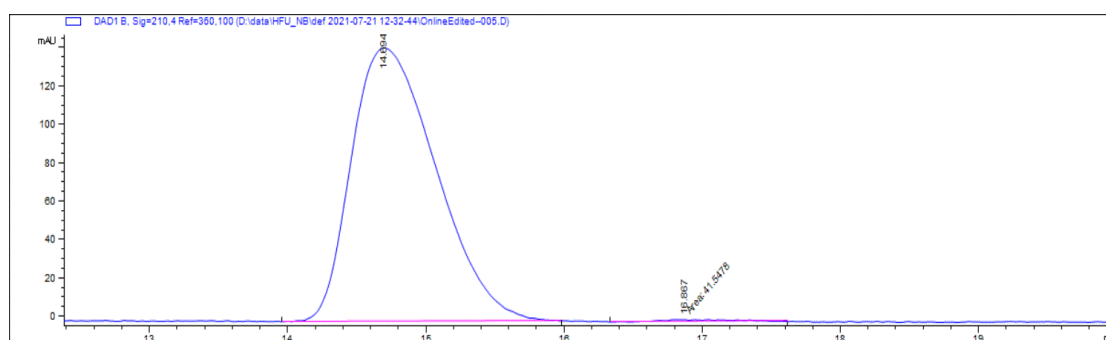

| # | Time   | Type | Area   | Height | Width  | Area%  | Symmetry |
|---|--------|------|--------|--------|--------|--------|----------|
| 1 | 14.694 | VB   | 6062.1 | 142.1  | 0.6057 | 99.319 | 0.599    |
| 2 | 16.867 | MM   | 41.5   | 1.1    | 0.64   | 0.681  | 0.488    |

(*S*)-*N,N*-Dimethyl-3-(*p*-tolyl)butanamide (**12**)

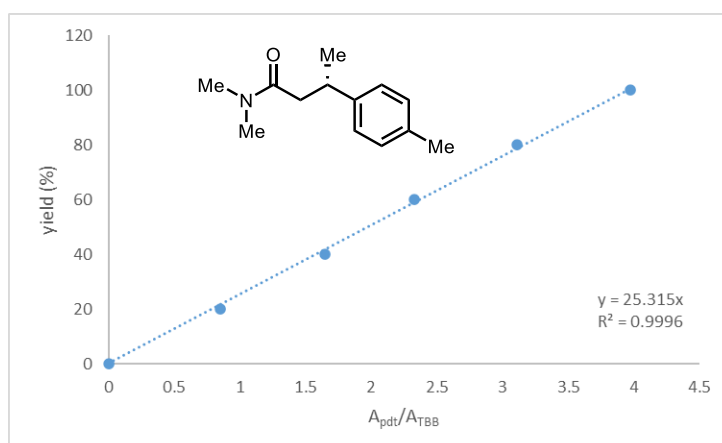

Prepared according to the general procedure 1 using  $\alpha$ -chloro-*N,N*-dimethylacetamide (**1a**, 10  $\mu\text{mol}$ , 2 equiv) and 1-methyl-4-(1-nitroethyl)benzene (**2f**, 5  $\mu\text{mol}$ , 1 equiv) catalyzed by CsER (1 mol%).

**Yields:** run 1: 98%, run 2: 94%, average yield 96%.

**Enantioselectivity:** 98:2 er. Chiral HPLC method: OD-H column, 210 nm, 5% isopropanol/n-heptane, flow rate 0.5 mL/min, room temperature,  $t_{\text{R}}$  (major) = 15.95 min,  $t_{\text{R}}$  (minor) = 18.68 min. **Absolute configuration** of the enzymatic product **12** is assigned as *S* by comparison with the previously reported chiral HPLC data <sup>5</sup>.

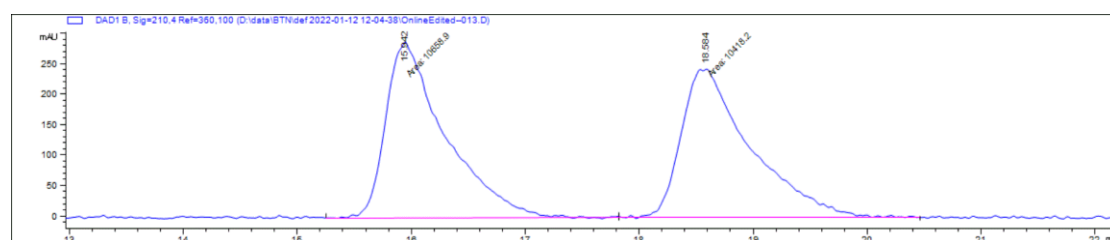

| # | Time   | Type | Area    | Height | Width  | Area%  | Symmetry |
|---|--------|------|---------|--------|--------|--------|----------|
| 1 | 15.942 | MF   | 10658.9 | 291.4  | 0.6096 | 50.571 | 0.476    |
| 2 | 18.584 | FM   | 10418.2 | 245.4  | 0.7074 | 49.429 | 0.556    |

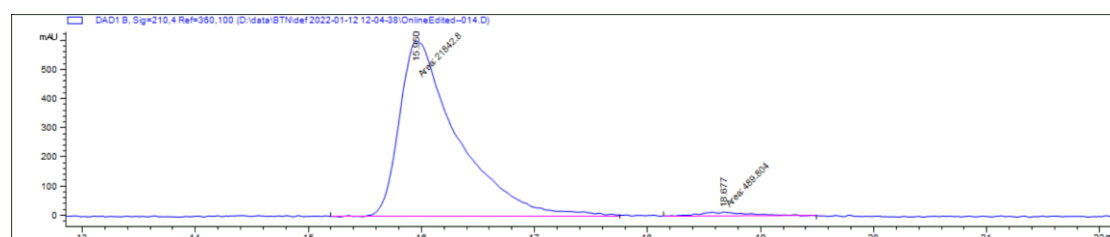

| # | Time   | Type | Area    | Height | Width  | Area%  | Symmetry |
|---|--------|------|---------|--------|--------|--------|----------|
| 1 | 15.95  | MH   | 21842.8 | 602.9  | 0.6038 | 97.807 | 0.386    |
| 2 | 18.677 | MM   | 489.8   | 14.9   | 0.5488 | 2.193  | 1.026    |

(*S*)-3-(4-Methoxyphenyl)-*N,N*-dimethylbutanamide (**13**)

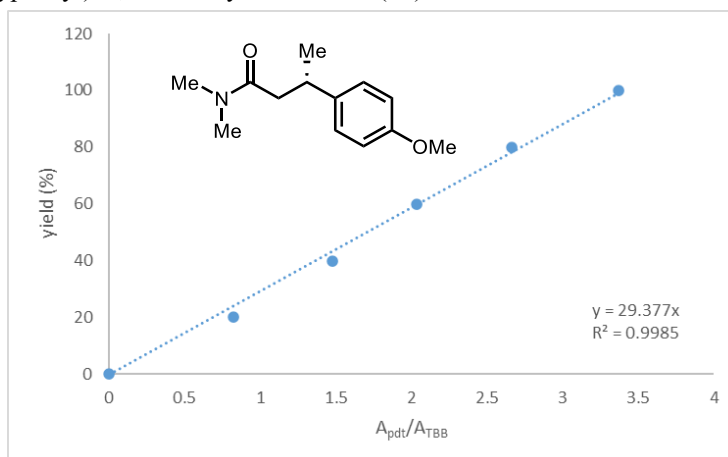

Prepared according to the general procedure 1 using  $\alpha$ -chloro-*N,N*-dimethylacetamide (**1a**, 10  $\mu$ mol, 2 equiv) and 1-methoxy-4-(1-nitroethyl)benzene (**2g**, 5  $\mu$ mol, 1 equiv) catalyzed by CsER (1 mol%).

**Yields:** run 1: 96%, run 2: 97%, average yield 96%.

**Enantioselectivity:** >99:1 er. Chiral HPLC method: OD-H column, 210 nm, 10% isopropanol/hexanes, flow rate 1.0 mL/min, room temperature,  $t_R$  (major) = 7.74 min.

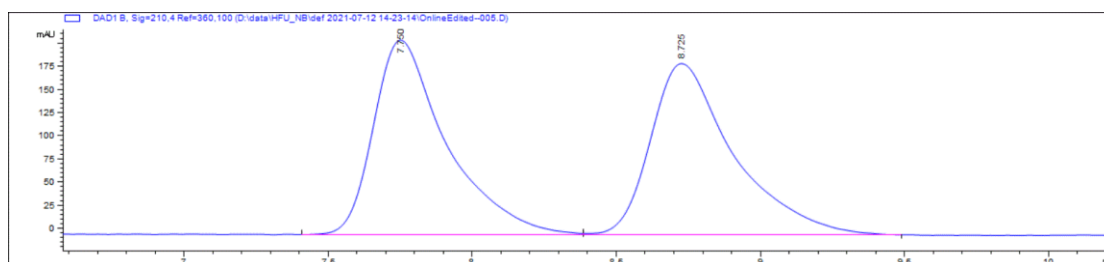

| # | Time  | Type | Area   | Height | Width  | Area%  | Symmetry |
|---|-------|------|--------|--------|--------|--------|----------|
| 1 | 7.75  | VV   | 3722.5 | 210.6  | 0.2582 | 49.908 | 0.548    |
| 2 | 8.725 | VV   | 3736.2 | 185.6  | 0.2949 | 50.092 | 0.558    |

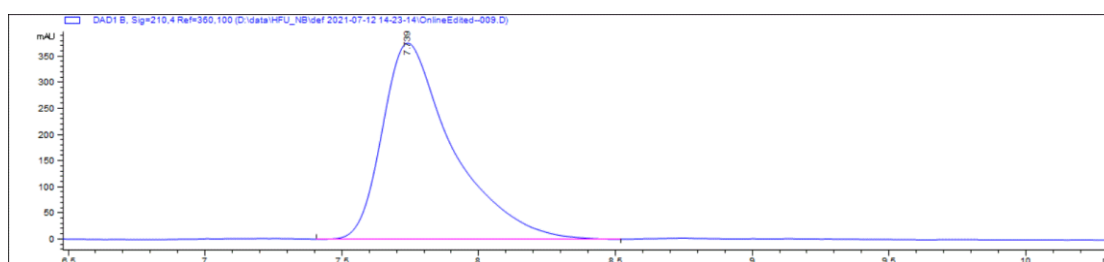

| # | Time  | Type | Area   | Height | Width | Area%   | Symmetry |
|---|-------|------|--------|--------|-------|---------|----------|
| 1 | 7.739 | VV   | 6794.7 | 379.3  | 0.261 | 100.000 | 0.523    |

(*S*)-3-(4-Chlorophenyl)-*N,N*-dimethylbutanamide (**14**)

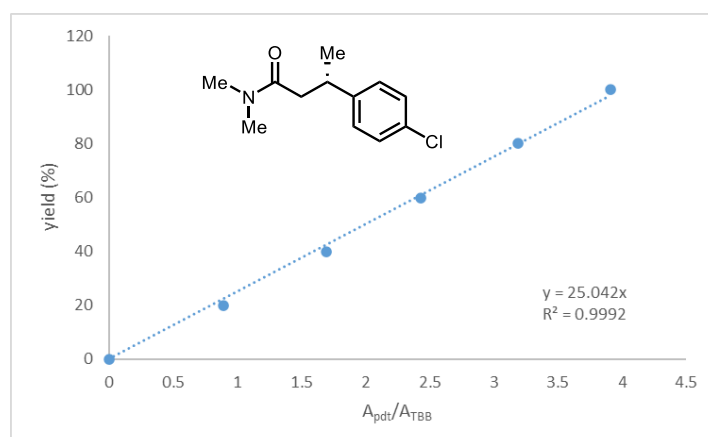

Prepared according to the general procedure 1 using  $\alpha$ -chloro-*N,N*-dimethylacetamide (**1a**, 10  $\mu\text{mol}$ , 2 equiv) and 1-chloro-4-(1-nitroethyl)benzene (**2h**, 5  $\mu\text{mol}$ , 1 equiv) catalyzed by CsER (1 mol%).

**Yields:** run 1: 98%, run 2: 96%, average yield 97%.

Preparative enzymatic synthesis was conducted according to the general procedure 2 using  $\alpha$ -chloro-*N,N*-dimethylacetamide (**1a**, 0.20 mmol, 2 equiv) and 1-chloro-4-(1-nitroethyl)benzene (**2h**, 0.10 mmol, 1 equiv) catalyzed by CsER (1 mol%). Isolated yield: 76% (white solid, 17 mg).

**Enantioselectivity:** 98:2 er. Chiral HPLC method: OD-H column, 210 nm, 5% isopropanol/hexanes, flow rate 1.0 mL/min, room temperature,  $t_{\text{R}}$  (major) = 9.50 min,  $t_{\text{R}}$  (minor) = 10.81 min.

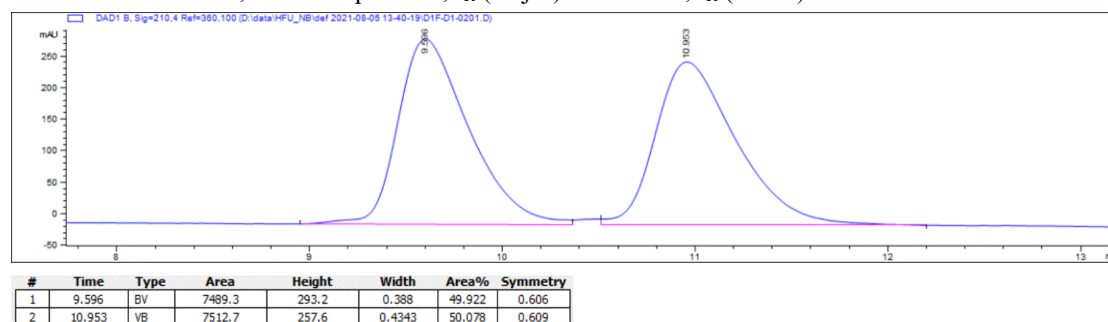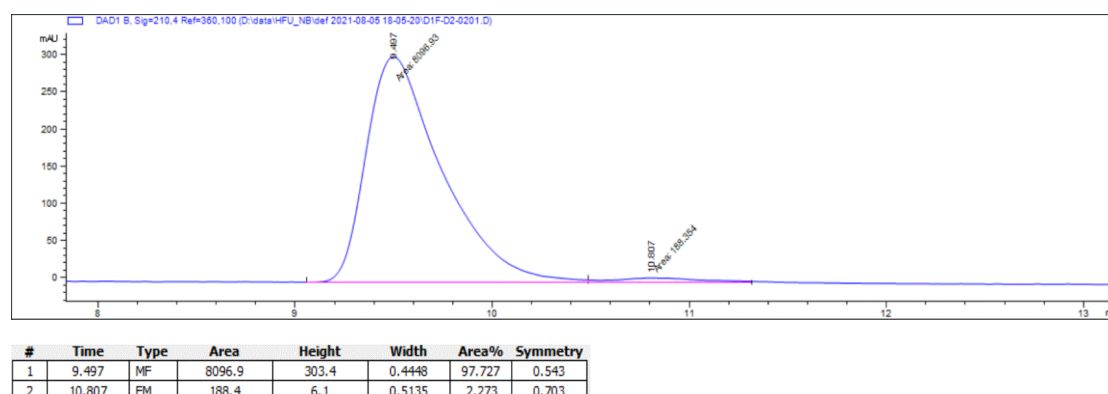

(S)-3-(4-Bromophenyl)-N,N-dimethylbutanamide (**15**)

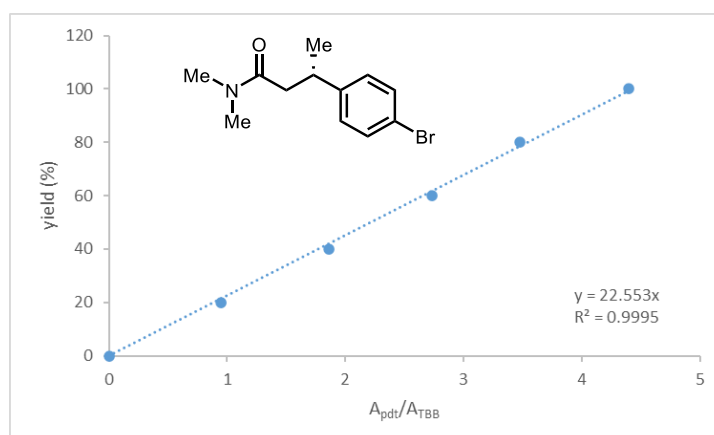

Prepared according to the general procedure 1 using  $\alpha$ -chloro-N,N-dimethylacetamide (**1a**, 10  $\mu$ mol, 2 equiv) and 1-bromo-4-(1-nitroethyl)benzene (**2i**, 5  $\mu$ mol, 1 equiv) catalyzed by CsER (1 mol%).

**Yields:** run 1: 94%, run 2: 93%, average yield 93%.

Preparative enzymatic synthesis was conducted according to the general procedure 2 using  $\alpha$ -chloro-N,N-dimethylacetamide (**1a**, 0.20 mmol, 2 equiv) and 1-bromo-4-(1-nitroethyl)benzene (**2i**, 0.10 mmol, 1 equiv) catalyzed by CsER (1 mol%). Isolated yield: 70% (white solid, 19 mg).

**Enantioselectivity:** 97:3 er. Chiral HPLC method: OD-H column, 210 nm, 5% isopropanol/hexanes, flow rate 1.0 mL/min, room temperature,  $t_R$  (major) = 9.96 min,  $t_R$  (minor) = 11.33 min.

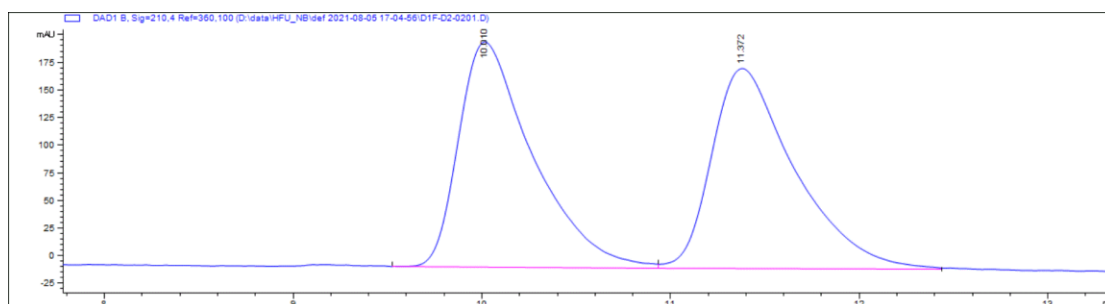

| # | Time   | Type | Area   | Height | Width  | Area%  | Symmetry |
|---|--------|------|--------|--------|--------|--------|----------|
| 1 | 10.01  | BV   | 5591.4 | 204.3  | 0.3993 | 50.123 | 0.508    |
| 2 | 11.372 | VV   | 5564   | 181.4  | 0.4377 | 49.877 | 0.552    |

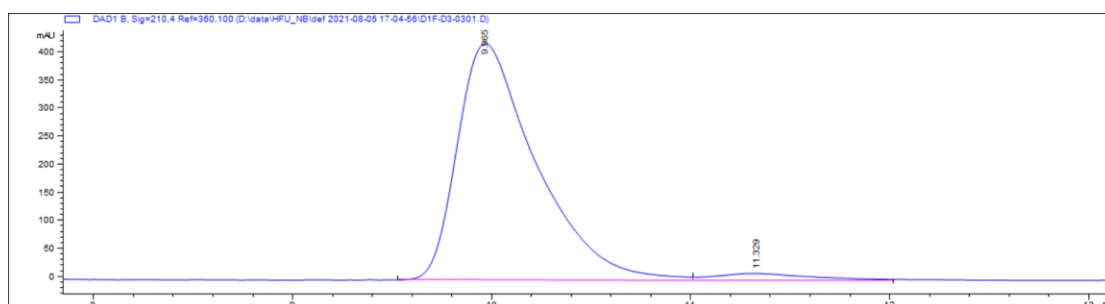

| # | Time   | Type | Area  | Height | Width  | Area%  | Symmetry |
|---|--------|------|-------|--------|--------|--------|----------|
| 1 | 9.965  | VV   | 11650 | 423.1  | 0.4012 | 96.552 | 0.518    |
| 2 | 11.329 | VV   | 416.1 | 12.4   | 0.4027 | 3.448  | 0.708    |



(*S*)-*N,N*-Dimethyl-3-[4-(trifluoromethyl)phenyl]butanamide (**16**)

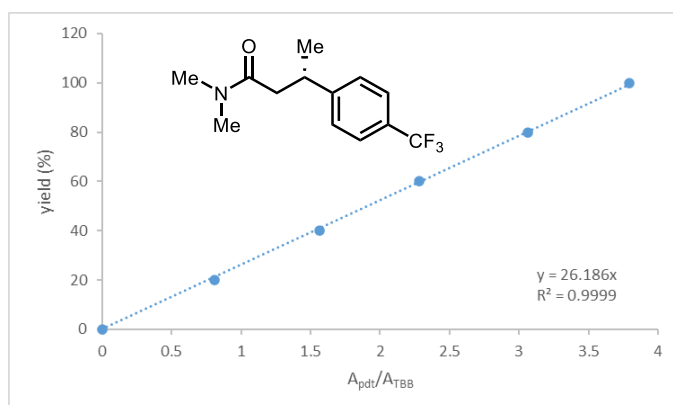

Prepared according to the general procedure 1 using  $\alpha$ -chloro-*N,N*-dimethylacetamide (**1a**, 10  $\mu$ mol, 2 equiv) and 1-(1-nitroethyl)-4-(trifluoromethyl)benzene (**2j**, 5  $\mu$ mol, 1 equiv) catalyzed by CsER (1 mol%). **Yields:** run 1: 98%, run 2: 97%, average yield 98%.

Preparative enzymatic synthesis was conducted according to the general procedure 2 using  $\alpha$ -chloro-*N,N*-dimethylacetamide (**1a**, 0.20 mmol, 2 equiv) and 1-(1-nitroethyl)-4-(trifluoromethyl)benzene (**2j**, 0.10 mmol, 1 equiv) catalyzed by CsER (1 mol%). Isolated yield: 77% (clear oil, 20 mg).

**Enantioselectivity:** 99:1 er. Chiral HPLC method: OD-H column, 210 nm, 5% isopropanol/hexanes, flow rate 1.0 mL/min, room temperature,  $t_R$  (major) = 8.71 min,  $t_R$  (minor) = 9.76 min.

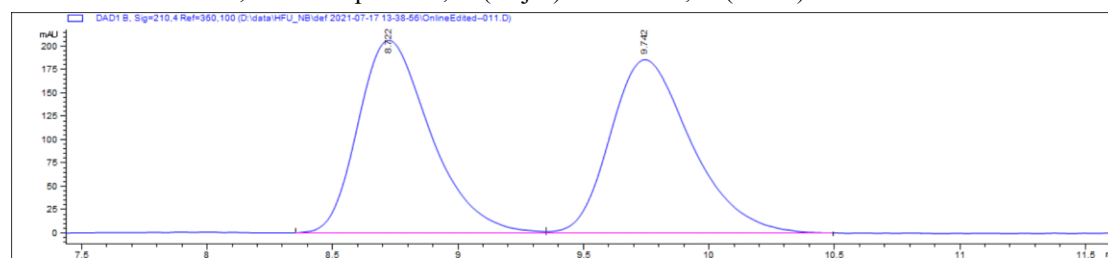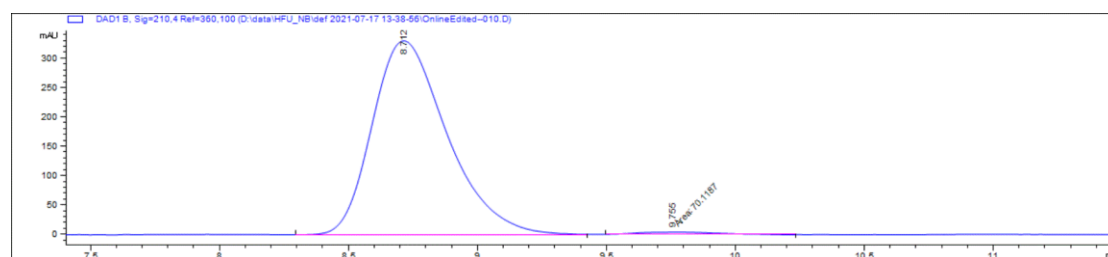

(*S*)-*N,N*-Dimethyl-3-(naphthalen-2-yl)butanamide (**17**)

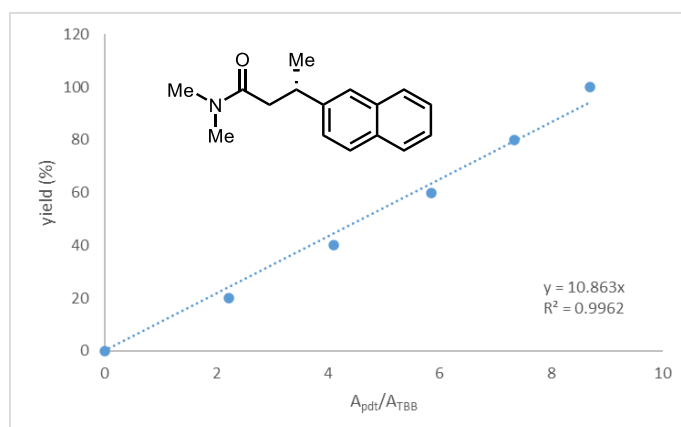

Prepared according to the general procedure 1 using  $\alpha$ -chloro-*N,N*-dimethylacetamide (**1a**, 10  $\mu$ mol, 2 equiv) and 2-(1-nitroethyl)naphthalene (**2k**, 5  $\mu$ mol, 1 equiv) catalyzed by CsER (1 mol%).

**Yields:** run 1: 58%, run 2: 58%, average yield 58%.

**Enantioselectivity:** 99:1 er. Chiral HPLC method: OD-H column, 210 nm, 5% isopropanol/hexanes, flow rate 1.0 mL/min, room temperature,  $t_R$  (major) = 14.69 min,  $t_R$  (minor) = 16.88 min.

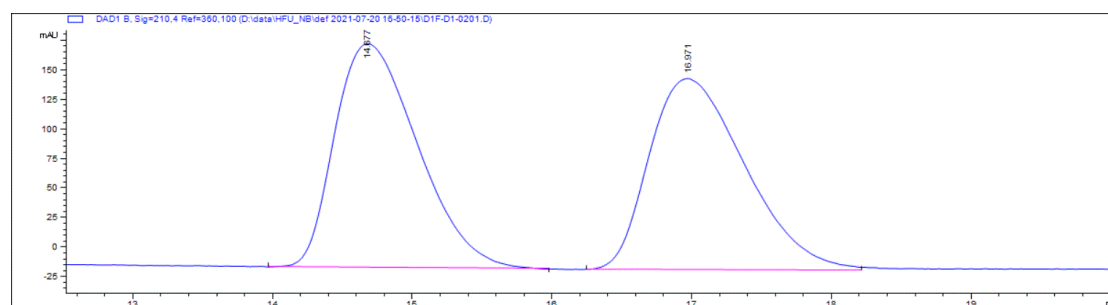

| # | Time   | Type | Area   | Height | Width  | Area%  | Symmetry |
|---|--------|------|--------|--------|--------|--------|----------|
| 1 | 14.677 | VB   | 7871.3 | 190.5  | 0.588  | 50.312 | 0.627    |
| 2 | 16.971 | BV   | 7773.5 | 162.6  | 0.6897 | 49.688 | 0.637    |

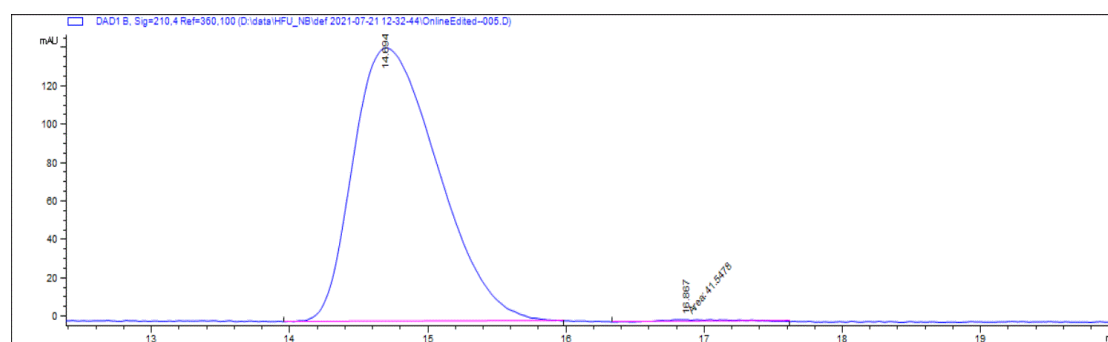

| # | Time   | Type | Area   | Height | Width  | Area%  | Symmetry |
|---|--------|------|--------|--------|--------|--------|----------|
| 1 | 14.694 | VB   | 6062.1 | 142.1  | 0.6057 | 99.319 | 0.599    |
| 2 | 16.867 | MM   | 41.5   | 1.1    | 0.64   | 0.681  | 0.488    |

*N,N*-Dimethyl-3-phenylpropanamide (**18**)

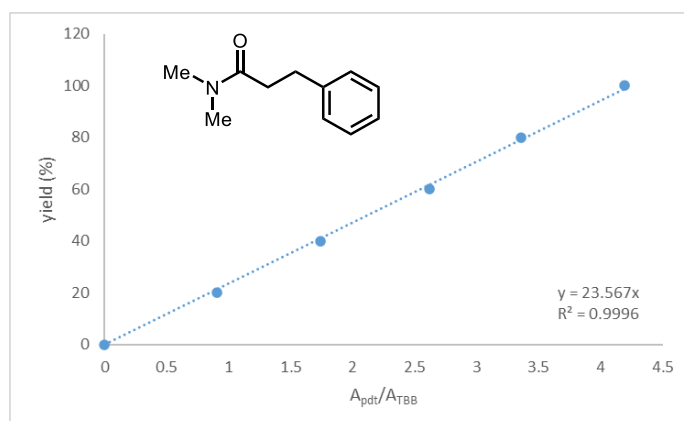

Prepared according to the general procedure 1 using  $\alpha$ -chloro-*N,N*-dimethylacetamide (**1a**, 10  $\mu\text{mol}$ , 2 equiv) and (nitromethyl)benzene (**2l**, 5  $\mu\text{mol}$ , 1 equiv) catalyzed by CsER (1 mol%).

**Yields:** run 1: 27%, run 2: 29%, average yield 28%.

*N,N*-Dimethyl-3-nitro-3-phenylpropanamide (**40**)

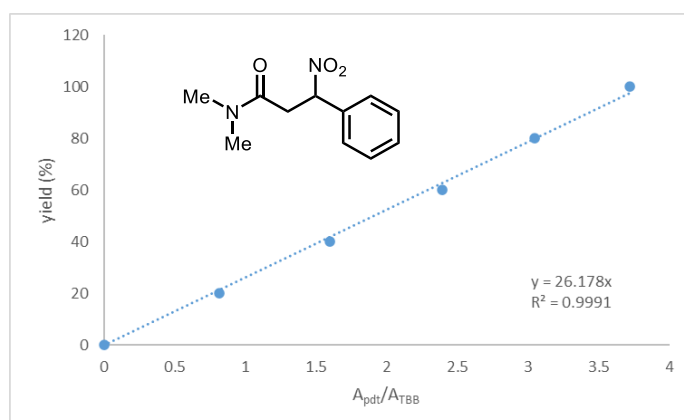

Prepared according to the general procedure 1 using  $\alpha$ -chloro-*N,N*-dimethylacetamide (**1a**, 10  $\mu\text{mol}$ , 2 equiv) and (nitromethyl)benzene (**2l**, 5  $\mu\text{mol}$ , 1 equiv) catalyzed by CsER (1 mol%).

**Yields:** run 1: 28%, run 2: 29%, average yield 29%.

(S)-N,N-Dimethyl-3-phenylpentanamide (**19**)

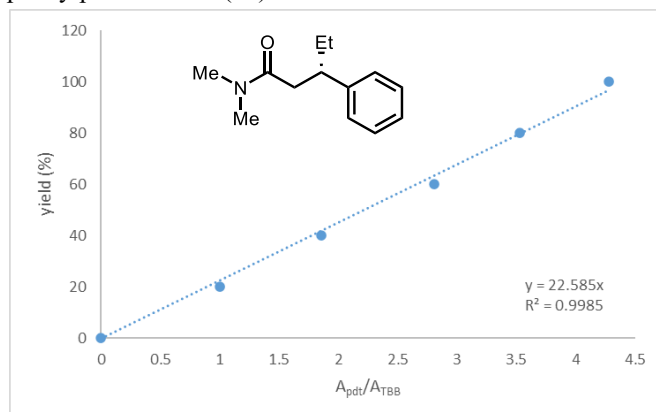

Prepared according to the general procedure 1 using  $\alpha$ -chloro-N,N-dimethylacetamide (**1a**, 10  $\mu$ mol, 2 equiv) and (1-nitropropyl)benzene (**2m**, 5  $\mu$ mol, 1 equiv) catalyzed by CsER (1 mol%).

**Yields:** run 1: 63%, run 2: 65%, average yield 64%.

**Enantioselectivity:** 98:2 er. Chiral HPLC method: OD-H column, 210 nm, 1% isopropanol/hexanes, flow rate 1.0 mL/min, room temperature,  $t_R$  (major) = 25.38 min,  $t_R$  (minor) = 30.96 min.

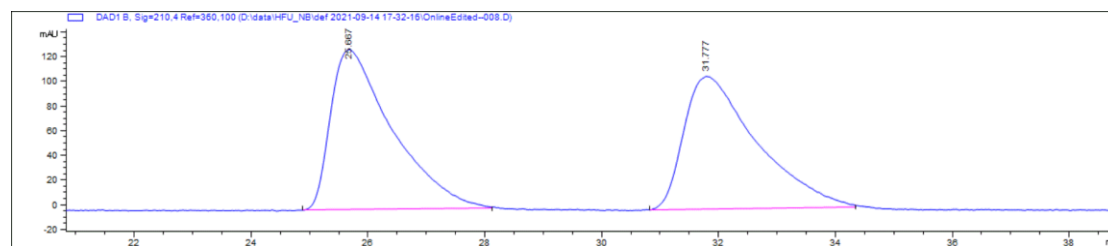

| # | Time   | Type | Area   | Height | Width  | Area%  | Symmetry |
|---|--------|------|--------|--------|--------|--------|----------|
| 1 | 25.667 | BB   | 9530   | 130.1  | 0.8708 | 50.440 | 0.412    |
| 2 | 31.777 | VV   | 9363.9 | 108    | 1.0254 | 49.560 | 0.436    |

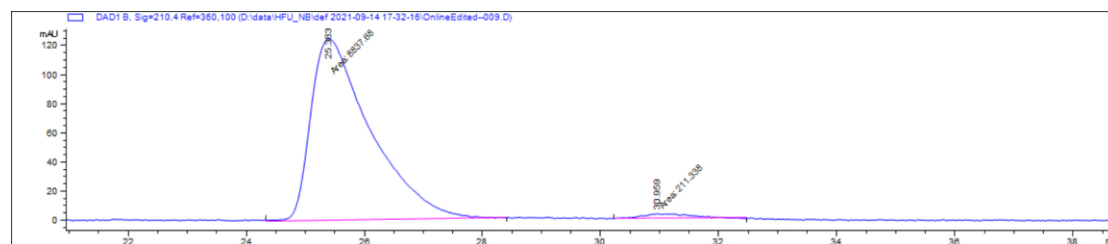

| # | Time   | Type | Area   | Height | Width  | Area%  | Symmetry |
|---|--------|------|--------|--------|--------|--------|----------|
| 1 | 25.383 | MM   | 8837.7 | 125.3  | 1.1757 | 97.665 | 0.411    |
| 2 | 30.959 | MM   | 211.3  | 3.5    | 1.0111 | 2.335  | 0.545    |

(S)-N,N-Dimethyl-3-phenylhexanamide (**20**)

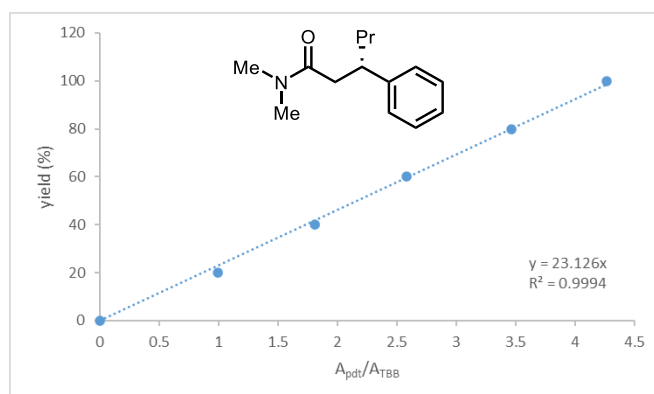

Prepared according to the general procedure 1 using  $\alpha$ -chloro-N,N-dimethylacetamide (**1a**, 10  $\mu$ mol, 2 equiv) and (1-nitrobutyl)benzene (**2n**, 5  $\mu$ mol, 1 equiv) catalyzed by CsER (2 mol%).

**Yields:** run 1: 14%, run 2: 16%, average yield 15%.

**Enantioselectivity:** 55:45 er. Chiral HPLC method: OD-H column, 210 nm, 1% isopropanol/hexanes, flow rate 1.0 mL/min, room temperature,  $t_R$  (minor) = 26.35min,  $t_R$  (major) = 28.70 min.

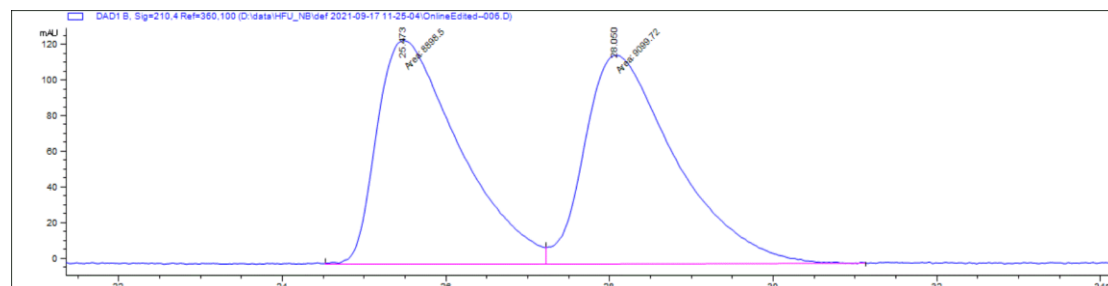

| # | Time   | Type | Area   | Height | Width  | Area%  | Symmetry |
|---|--------|------|--------|--------|--------|--------|----------|
| 1 | 25.473 | MF   | 8898.5 | 126.4  | 1.1734 | 49.441 | 0        |
| 2 | 28.05  | FM   | 9099.7 | 117.7  | 1.2888 | 50.559 | 0.479    |

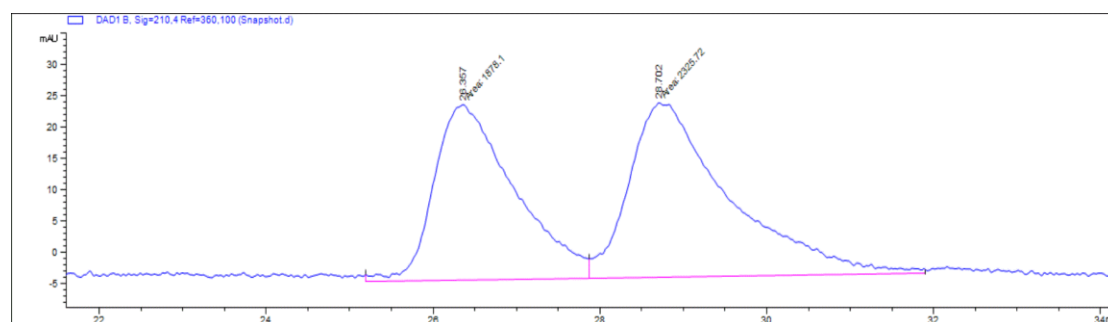

| # | Time   | Type | Area   | Height | Width  | Area%  | Symmetry |
|---|--------|------|--------|--------|--------|--------|----------|
| 1 | 26.357 | MF   | 1878.1 | 28     | 1.1181 | 44.676 | 0.564    |
| 2 | 28.702 | FM   | 2325.7 | 27.8   | 1.393  | 55.324 | 0.421    |

(*S*)-*N,N*-Dimethyl-3-(thiophen-3-yl)butanamide (**22**)

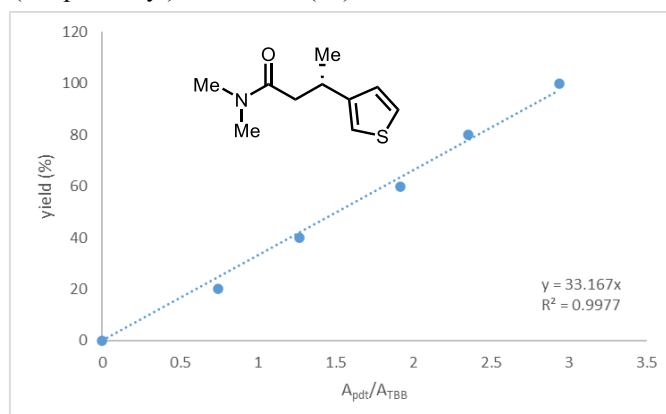

Prepared according to the general procedure 1 using  $\alpha$ -chloro-*N,N*-dimethylacetamide (**1a**, 10  $\mu$ mol, 2 equiv) and 3-(1-nitroethyl)thiophene (**2p**, 5  $\mu$ mol, 1 equiv) catalyzed by CsER (1 mol%).

**Yields:** run 1: 75%, run 2: 76%, average yield 76%.

**Enantioselectivity:** 94:6 er. Chiral HPLC method: OJ-H column, 210 nm, 1% isopropanol/hexanes, flow rate 1.0 mL/min, room temperature,  $t_R$  (minor) = 9.07 min,  $t_R$  (major) = 9.66 min.

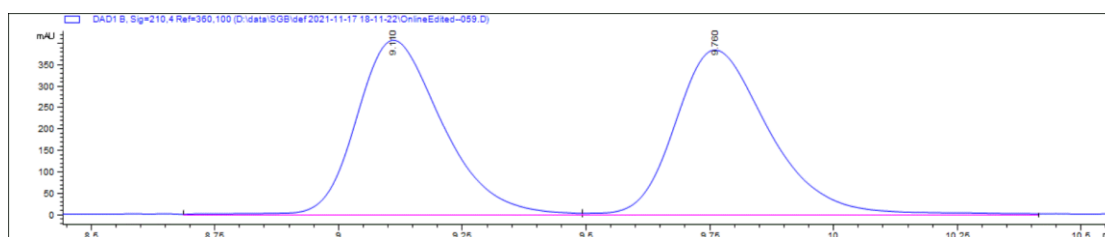

| # | Time | Type | Area   | Height | Width  | Area%  | Symmetry |
|---|------|------|--------|--------|--------|--------|----------|
| 1 | 9.11 | VV   | 5022.3 | 410    | 0.1889 | 49.102 | 0.723    |
| 2 | 9.76 | VB   | 5205.9 | 387.1  | 0.2029 | 50.898 | 0.681    |

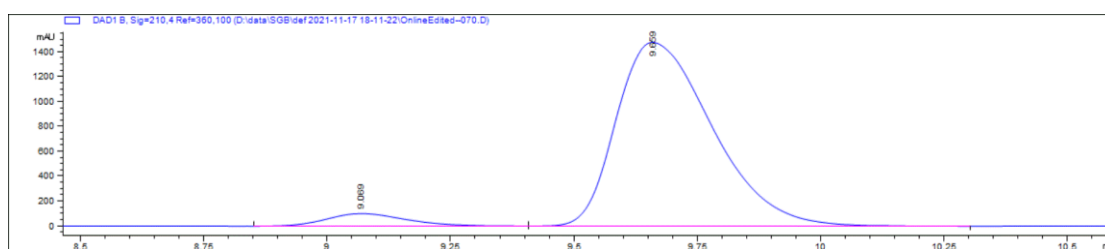

| # | Time  | Type | Area    | Height | Width  | Area%  | Symmetry |
|---|-------|------|---------|--------|--------|--------|----------|
| 1 | 9.069 | VV   | 1201    | 102.9  | 0.1762 | 5.617  | 0.733    |
| 2 | 9.659 | VV   | 20180.7 | 1488   | 0.2082 | 94.383 | 0.581    |

(*S*)-*N,N*-Dimethyl-3-(pyridin-3-yl)butanamide (**23**)

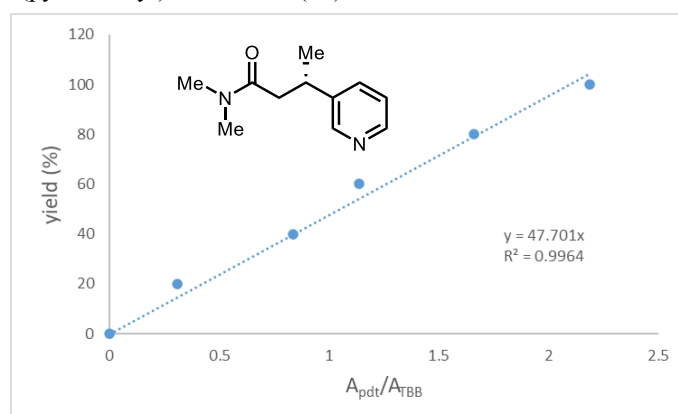

Prepared according to the general procedure 1 using  $\alpha$ -chloro-*N,N*-dimethylacetamide (**1a**, 10  $\mu$ mol, 2 equiv) and 3-(1-nitroethyl)pyridine (**2q**, 5  $\mu$ mol, 1 equiv) catalyzed by CsER (1 mol%). The product standard curve was made using a AS-H column, with 20% isopropanol/hexanes as mobile phase, due to the high polarity of the enzymatic product **23**.

**Yields:** run 1: 42%, run 2: 38%, average yield 40%.

**Enantioselectivity:** 80:20 er. Chiral HPLC method: AS-H column, 210 nm, 15% isopropanol/hexanes, flow rate 1.0 mL/min, room temperature,  $t_R$  (minor) = 14.76 min,  $t_R$  (major) = 15.73 min.

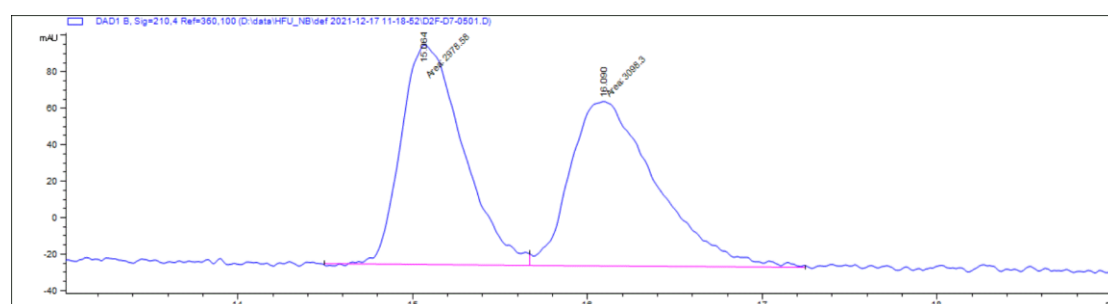

| # | Time   | Type | Area   | Height | Width  | Area%  | Symmetry |
|---|--------|------|--------|--------|--------|--------|----------|
| 1 | 15.064 | MF   | 2978.6 | 120.4  | 0.4123 | 49.015 | 0.593    |
| 2 | 16.09  | FM   | 3098.3 | 90.1   | 0.573  | 50.985 | 0.616    |

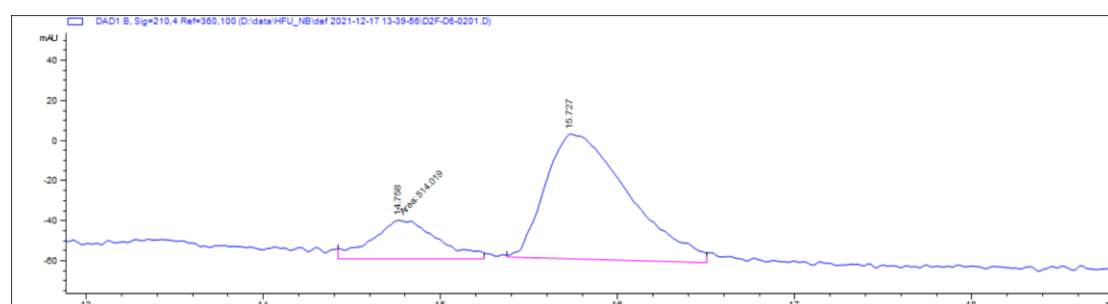

| # | Time   | Type | Area   | Height | Width  | Area%  | Symmetry |
|---|--------|------|--------|--------|--------|--------|----------|
| 1 | 14.758 | MM   | 514    | 19.7   | 0.4338 | 20.081 | 0.684    |
| 2 | 15.727 | VV   | 2045.7 | 62.6   | 0.3893 | 79.919 | 0.433    |

(*S*)-3-(6-Methoxypyridin-3-yl)-*N,N*-dimethylbutanamide (**24**)

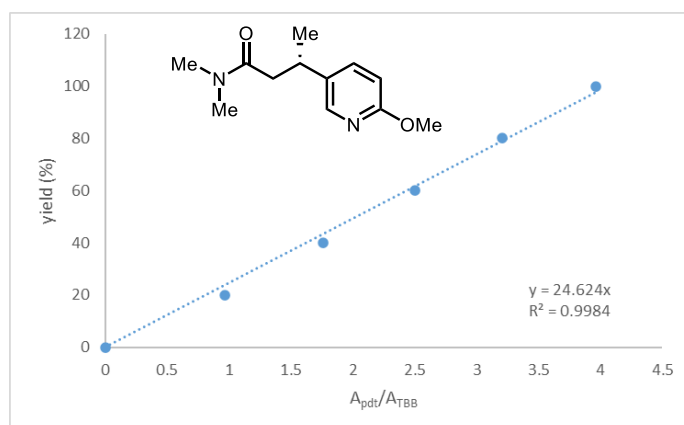

Prepared according to the general procedure 1 using  $\alpha$ -chloro-*N,N*-dimethylacetamide (**1a**, 10  $\mu$ mol, 2 equiv) and 2-methoxy-5-(1-nitroethyl)pyridine (**2r**, 5  $\mu$ mol, 1 equiv) catalyzed by CsER (1 mol%).

**Yields:** run 1: 96%, run 2: 95%, average yield 95%.

**Enantioselectivity:** 99:1 er. Chiral HPLC method: AS-H column, 210 nm, 15% isopropanol/hexanes, flow rate 1.0 mL/min, room temperature,  $t_R$  (major) = 12.43 min,  $t_R$  (minor) = 14.21 min.

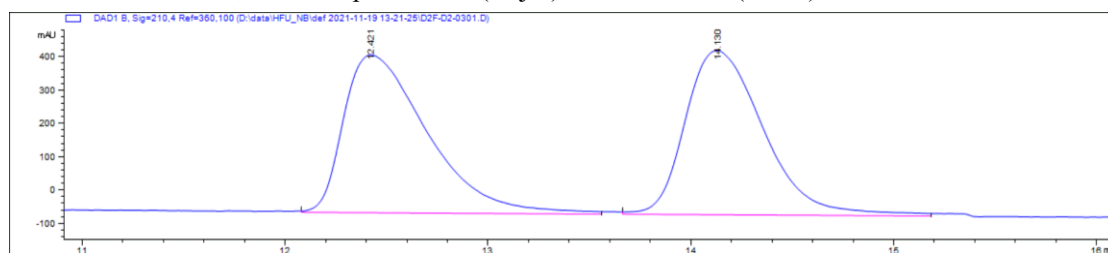

| # | Time   | Type | Area    | Height | Width  | Area%  | Symmetry |
|---|--------|------|---------|--------|--------|--------|----------|
| 1 | 12.421 | VV   | 13620   | 473.6  | 0.4035 | 50.556 | 0.451    |
| 2 | 14.13  | VV   | 13320.3 | 492.3  | 0.4237 | 49.444 | 0.639    |

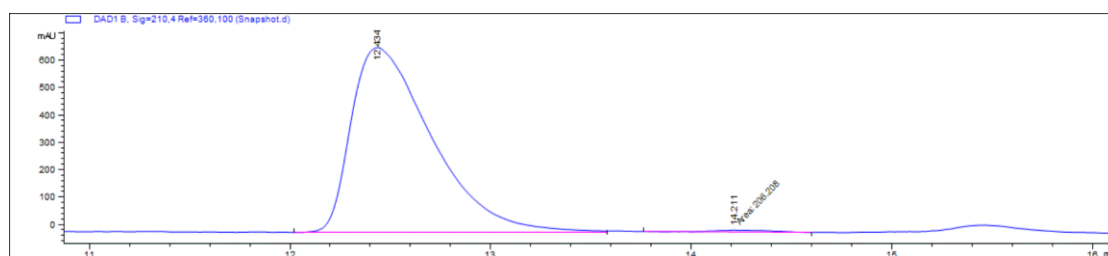

| # | Time   | Type | Area    | Height | Width  | Area%  | Symmetry |
|---|--------|------|---------|--------|--------|--------|----------|
| 1 | 12.434 | VV   | 18991.5 | 677.2  | 0.3952 | 98.926 | 0.458    |
| 2 | 14.211 | MM   | 206.2   | 8.2    | 0.419  | 1.074  | 0.648    |



(S)-Ethyl 4-(dimethylamino)-2-methyl-4-oxobutanoate (**25**)

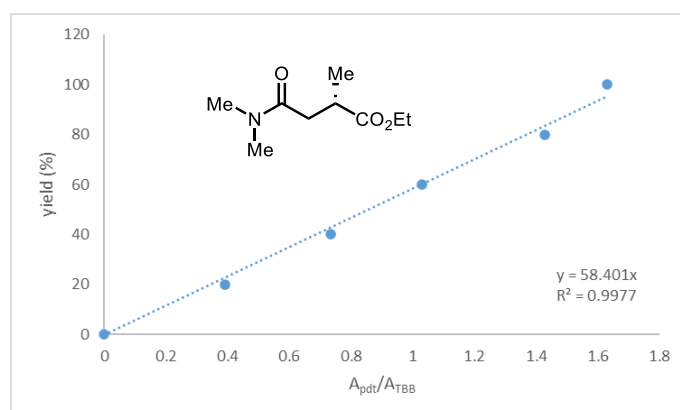

Prepared according to the general procedure 1 using  $\alpha$ -chloro-*N,N*-dimethylacetamide (**1a**, 10  $\mu$ mol, 2 equiv) and ethyl 2-nitropropanoate (**2s**, 5  $\mu$ mol, 1 equiv) catalyzed by CsER (1 mol%).

**Yields:** run 1: 97%, run 2: 95%, average yield 96%.

**Enantioselectivity:** 82:18 er. Chiral HPLC method: OJ-H column, 210 nm, 10% isopropanol/hexanes, flow rate 1.0 mL/min, room temperature,  $t_R$  (minor) = 6.82 min,  $t_R$  (major) = 7.38 min.

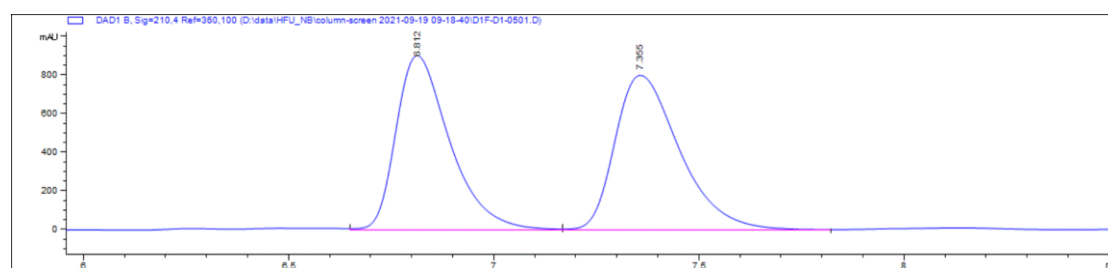

| # | Time  | Type | Area   | Height | Width  | Area%  | Symmetry |
|---|-------|------|--------|--------|--------|--------|----------|
| 1 | 6.812 | VV   | 8415.3 | 913.2  | 0.1395 | 48.308 | 0.603    |
| 2 | 7.355 | VB   | 9004.9 | 809.8  | 0.1697 | 51.692 | 0.601    |

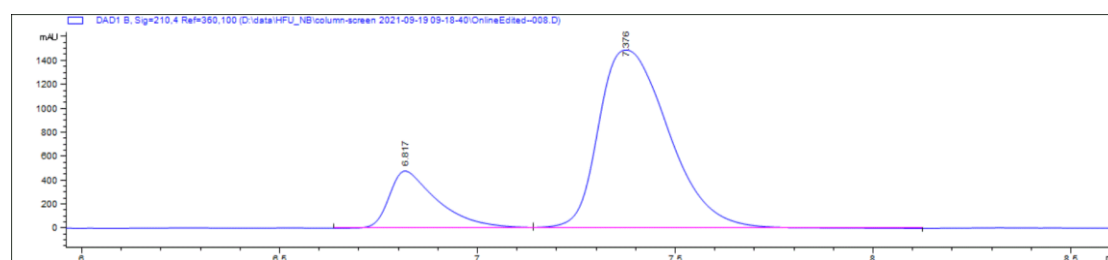

| # | Time  | Type | Area    | Height | Width  | Area%  | Symmetry |
|---|-------|------|---------|--------|--------|--------|----------|
| 1 | 6.817 | VV   | 4198.7  | 485.3  | 0.1249 | 18.374 | 0.461    |
| 2 | 7.376 | VB   | 18652.8 | 1503   | 0.1968 | 81.626 | 0.603    |

(*S*)-*N*-Methyl-3-[4-(trifluoromethyl)phenyl]butanamide (**26**)

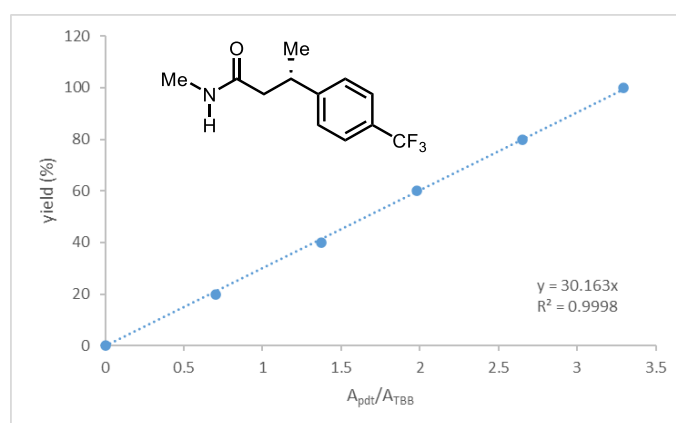

Prepared according to the general procedure 1 using  $\alpha$ -chloro-*N*-methylacetamide (**1b**, 10  $\mu$ mol, 2 equiv) and 1-(1-nitroethyl)-4-(trifluoromethyl)benzene (**2j**, 5  $\mu$ mol, 1 equiv) catalyzed by CsER (1 mol%).

**Yields:** run 1: 76%, run 2: 73%, average yield 75%.

**Enantioselectivity:** 95:5 er. Chiral HPLC method: AS-H column, 210 nm, 10% isopropanol/hexanes, flow rate 1.0 mL/min, room temperature,  $t_R$  (major) = 19.17 min,  $t_R$  (minor) = 20.88 min.

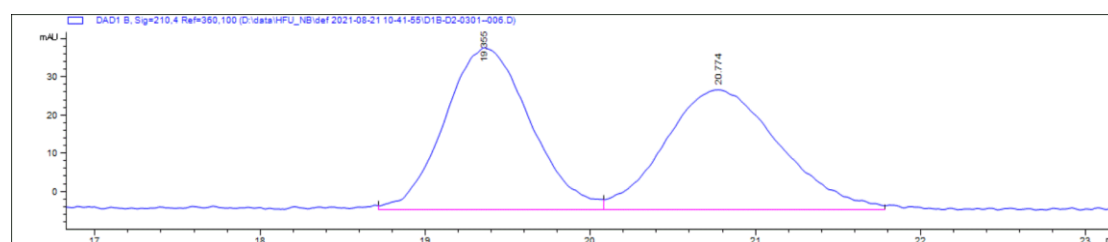

| # | Time   | Type | Area   | Height | Width  | Area%  | Symmetry |
|---|--------|------|--------|--------|--------|--------|----------|
| 1 | 19.355 | VV   | 1539.8 | 42.7   | 0.4351 | 50.082 | 0.846    |
| 2 | 20.774 | VV   | 1534.7 | 31.7   | 0.6035 | 49.918 | 0.837    |

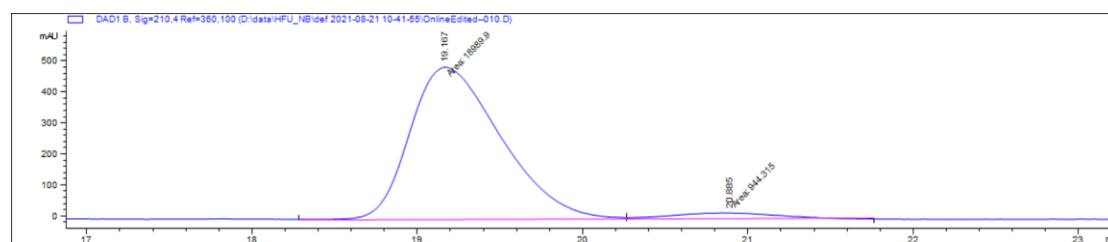

| # | Time   | Type | Area    | Height | Width  | Area%  | Symmetry |
|---|--------|------|---------|--------|--------|--------|----------|
| 1 | 19.167 | MF   | 18989.9 | 493.4  | 0.6415 | 95.263 | 0.621    |
| 2 | 20.885 | FM   | 944.3   | 20.3   | 0.7736 | 4.737  | 1.126    |

(*S*)-*N*-Benzyl-3-[4-(trifluoromethyl)phenyl]butanamide (**27**)

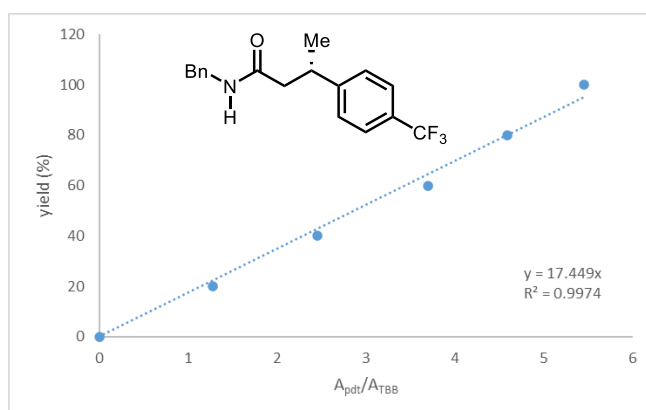

Prepared according to the general procedure 1 using  $\alpha$ -chloro-*N*-benzylacetamide (**1c**, 10  $\mu\text{mol}$ , 2 equiv) and 1-(1-nitroethyl)-4-(trifluoromethyl)benzene (**2j**, 5  $\mu\text{mol}$ , 1 equiv) catalyzed by CsER (1 mol%).

**Yields:** run 1: 55%, run 2: 51%, average yield 53%.

**Enantioselectivity:** 87:13 er. Chiral HPLC method: OJ-H column, 210 nm, 10% isopropanol/hexanes, flow rate 1.0 mL/min, room temperature,  $t_R$  (minor) = 9.17 min,  $t_R$  (major) = 10.99 min.

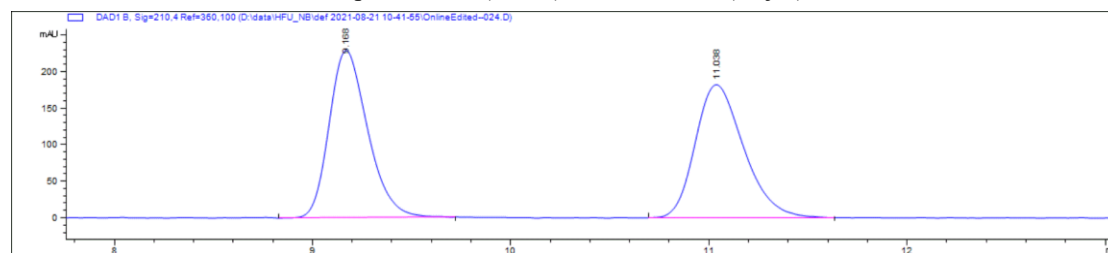

| # | Time   | Type | Area   | Height | Width  | Area%  | Symmetry |
|---|--------|------|--------|--------|--------|--------|----------|
| 1 | 9.168  | VB   | 3105.7 | 229.1  | 0.2082 | 49.827 | 0.739    |
| 2 | 11.038 | BB   | 3127.2 | 182.5  | 0.2619 | 50.173 | 0.73     |

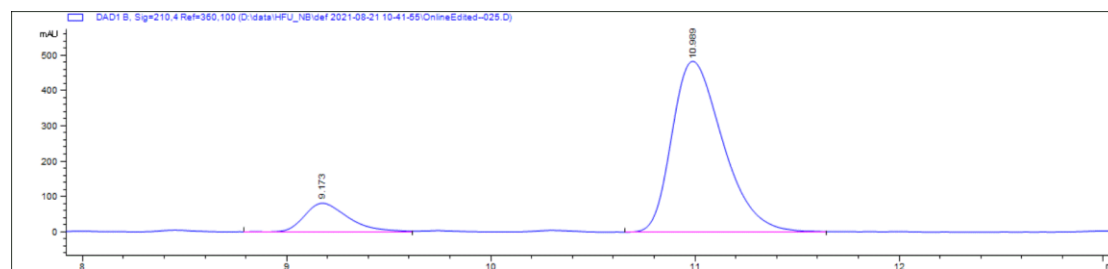

| # | Time   | Type | Area   | Height | Width  | Area%  | Symmetry |
|---|--------|------|--------|--------|--------|--------|----------|
| 1 | 9.173  | VV   | 1296.8 | 83     | 0.2382 | 13.278 | 0.662    |
| 2 | 10.989 | VV   | 8469.7 | 484.9  | 0.2678 | 86.722 | 0.652    |

(*S*)-*N*-Benzyl-*N*-methyl-3-phenylbutanamide (**28**)

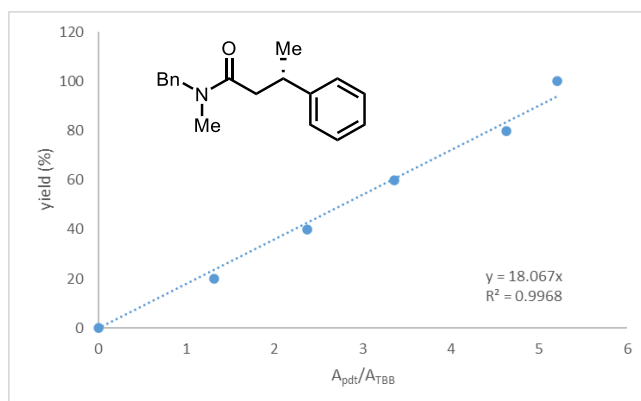

Prepared according to the general procedure 1 using  $\alpha$ -chloro-*N*-benzyl-*N*-methylacetamide (**1d**, 5  $\mu$ mol, 1 equiv) and 1-nitroethylbenzene (**2a**, 10  $\mu$ mol, 2 equiv) catalyzed by CsER (1 mol%).

**Yields:** run 1: 46%, run 2: 48%, average yield 47%.

**Enantioselectivity:** >99:1 er. Chiral HPLC method: OJ-H column, 210 nm, 10% isopropanol/hexanes, flow rate 1.0 mL/min, room temperature,  $t_R$  (major) = 15.64 min.

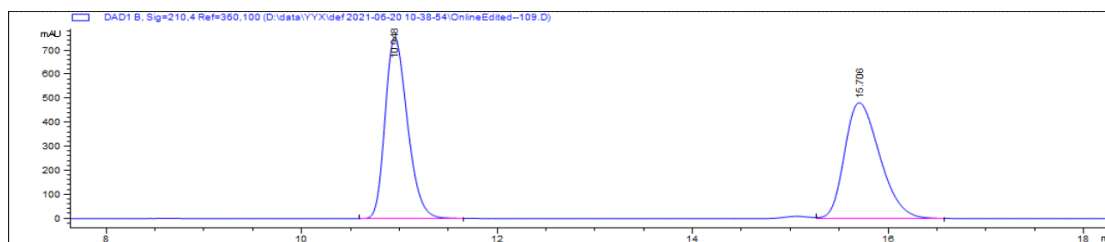

| # | Time   | Type | Area    | Height | Width  | Area%  | Symmetry |
|---|--------|------|---------|--------|--------|--------|----------|
| 1 | 10.948 | VB   | 11965.1 | 752.3  | 0.2476 | 49.816 | 0.714    |
| 2 | 15.706 | VB   | 12053.4 | 480.1  | 0.3889 | 50.184 | 0.677    |

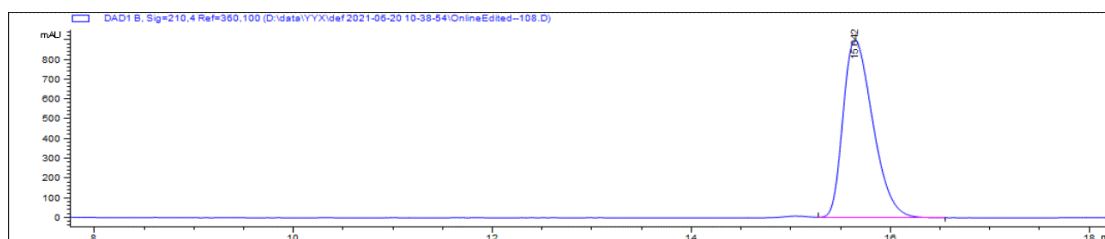

| # | Time   | Type | Area  | Height | Width  | Area%   | Symmetry |
|---|--------|------|-------|--------|--------|---------|----------|
| 1 | 15.642 | VB   | 18871 | 905.7  | 0.3251 | 100.000 | 0.638    |

(*S*)-*N*-Methoxy-*N*-methyl-3-phenylbutanamide (**29**)

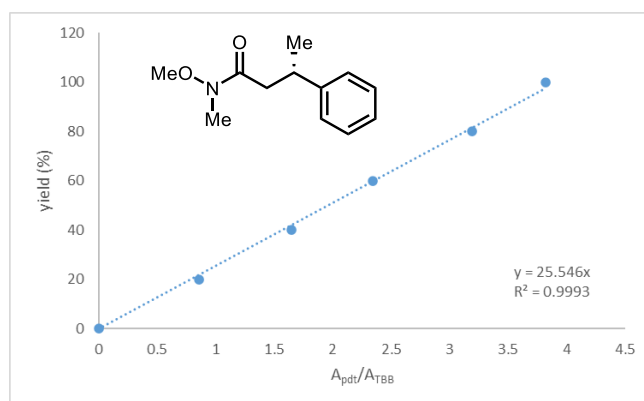

Prepared according to the general procedure 1 using  $\alpha$ -chloro-*N*-methoxy-*N*-methylacetamide (**1e**, 5  $\mu$ mol, 1 equiv) and 1-nitroethylbenzene (**2a**, 10  $\mu$ mol, 2 equiv) catalyzed by CsER (1 mol%).

**Yields:** run 1: 54%, run 2: 52%, average yield 53%.

**Enantioselectivity:** 61:39 er. Chiral HPLC method: OJ-H column, 220 nm, 10% isopropanol/hexanes, flow rate 1.0 mL/min, room temperature,  $t_R$  (minor) = 9.11 min,  $t_R$  (major) = 9.68 min.

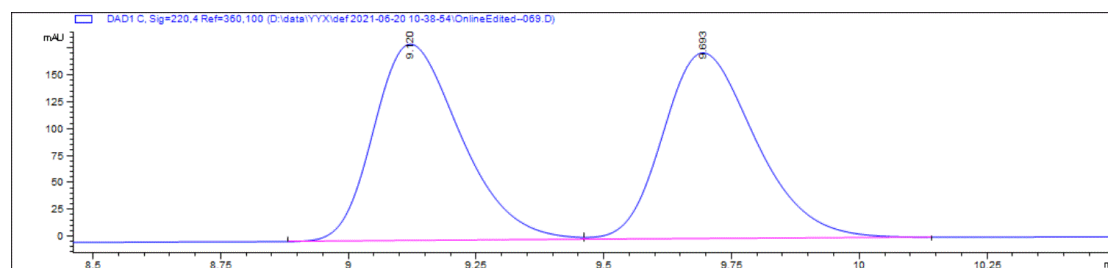

| # | Time  | Type | Area   | Height | Width  | Area%  | Symmetry |
|---|-------|------|--------|--------|--------|--------|----------|
| 1 | 9.12  | BV   | 2194.6 | 184.8  | 0.1846 | 49.766 | 0.688    |
| 2 | 9.693 | VB   | 2215.3 | 174.9  | 0.1938 | 50.234 | 0.727    |

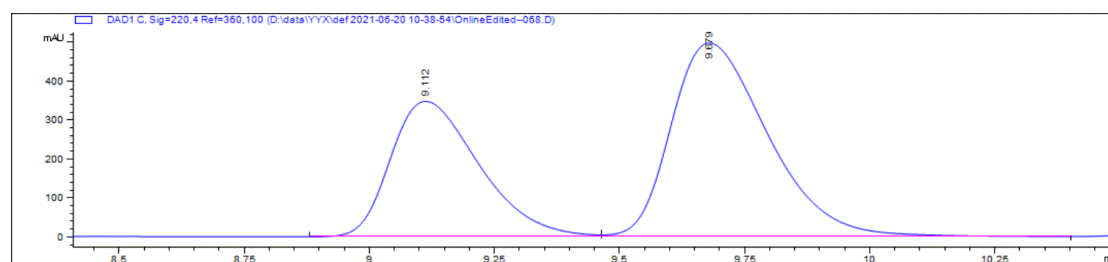

| # | Time  | Type | Area   | Height | Width  | Area%  | Symmetry |
|---|-------|------|--------|--------|--------|--------|----------|
| 1 | 9.112 | BV   | 4280   | 348.7  | 0.1912 | 38.949 | 0.621    |
| 2 | 9.679 | VB   | 6708.7 | 498.9  | 0.2089 | 61.051 | 0.615    |

(S)-3-Phenyl-1-(pyrrolidin-1-yl)butan-1-one (**30**)

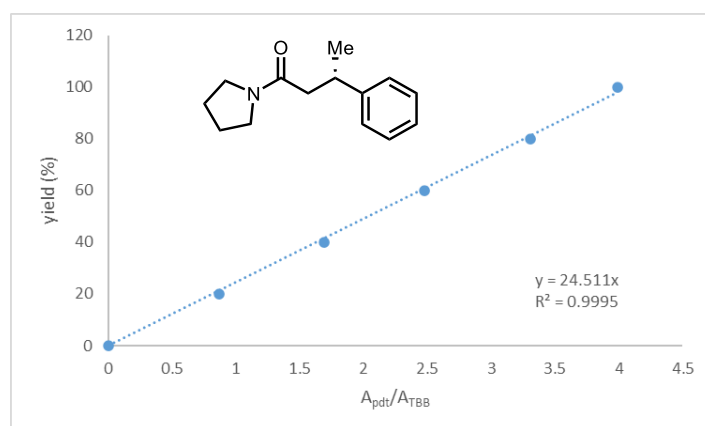

Prepared according to the general procedure 1 using  $\alpha$ -chloro-1-(pyrrolidin-1-yl)ethan-1-one (**1f**, 10  $\mu$ mol, 2 equiv) and 1-nitroethylbenzene (**2a**, 5  $\mu$ mol, 1 equiv) catalyzed by CsER (1 mol%).

**Yields:** run 1: 95%, run 2: 96%, average yield 95%.

**Enantioselectivity:** 84:16 er. Chiral HPLC method: OJ-H column, 220 nm, 10% isopropanol/hexanes, flow rate 1.0 mL/min, room temperature,  $t_R$  (minor) = 8.02 min,  $t_R$  (major) = 8.43 min.

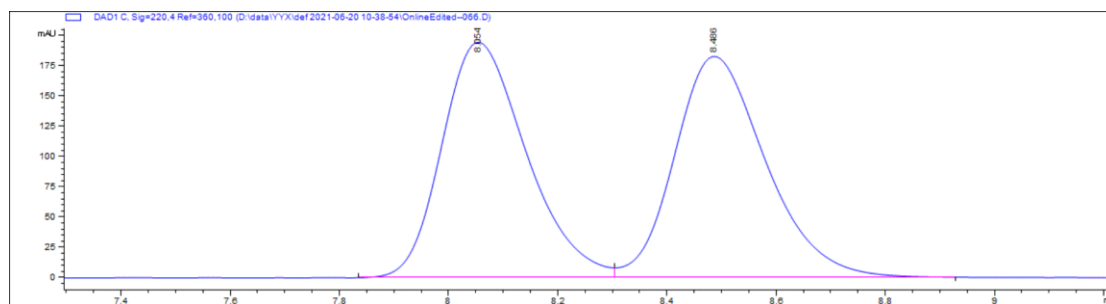

| # | Time  | Type | Area   | Height | Width  | Area%  | Symmetry |
|---|-------|------|--------|--------|--------|--------|----------|
| 1 | 8.054 | BV   | 2101.9 | 196    | 0.1671 | 49.643 | 0.719    |
| 2 | 8.486 | VB   | 2132.1 | 184.1  | 0.1791 | 50.357 | 0.734    |

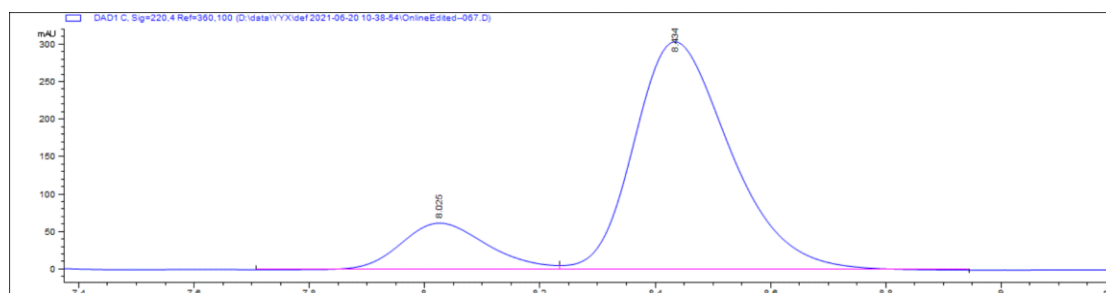

| # | Time  | Type | Area   | Height | Width  | Area%  | Symmetry |
|---|-------|------|--------|--------|--------|--------|----------|
| 1 | 8.025 | VV   | 662    | 62.7   | 0.1612 | 15.707 | 0.784    |
| 2 | 8.434 | VB   | 3552.4 | 305.9  | 0.1795 | 84.293 | 0.703    |

(S)-1-(Pyrrolidin-1-yl)-3-[4-(trifluoromethyl)phenyl]butan-1-one (**31**)

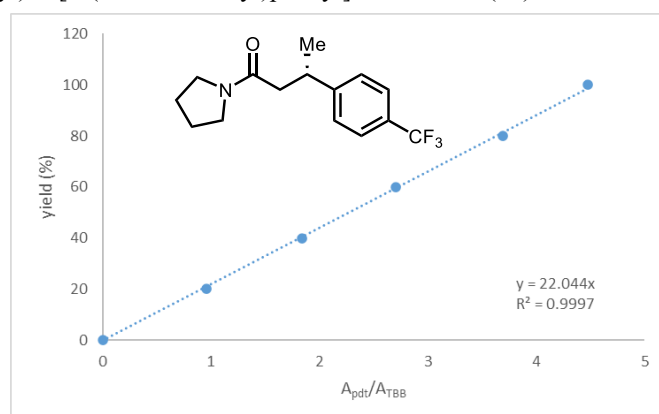

Prepared according to the general procedure 1 using  $\alpha$ -chloro-1-(pyrrolidin-1-yl)ethan-1-one (**1f**, 10  $\mu$ mol, 2 equiv) and 1-(1-nitroethyl)-4-(trifluoromethyl)benzene (**2j**, 5  $\mu$ mol, 1 equiv) catalyzed by CsER (1 mol%).

**Yields:** run 1: 87%, run 2: 87%, average yield 87%.

**Enantioselectivity:** 96:4 er. Chiral HPLC method: OD-H column, 210 nm, 5% isopropanol/hexanes, flow rate 1.0 mL/min, room temperature,  $t_R$  (major) = 10.40 min,  $t_R$  (minor) = 11.49 min.

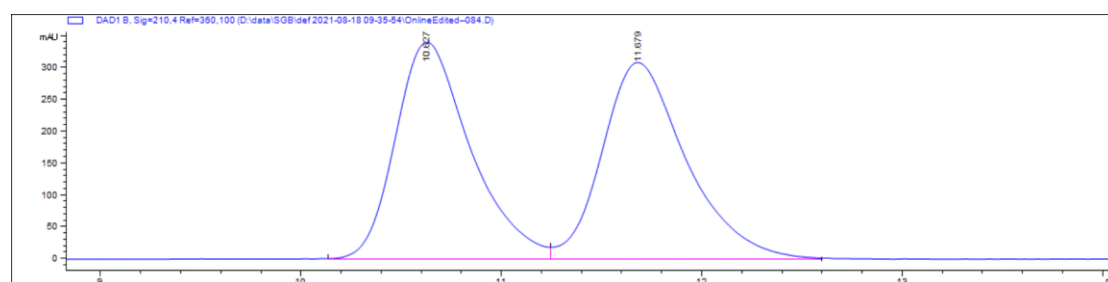

| # | Time   | Type | Area   | Height | Width  | Area%  | Symmetry |
|---|--------|------|--------|--------|--------|--------|----------|
| 1 | 10.627 | VV   | 8984.1 | 343.3  | 0.3953 | 49.643 | 0.689    |
| 2 | 11.679 | VV   | 9113.4 | 311.3  | 0.4396 | 50.357 | 0.693    |

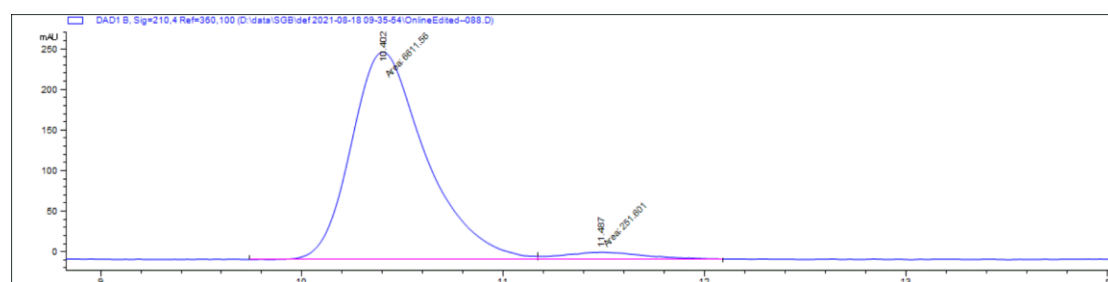

| # | Time   | Type | Area   | Height | Width  | Area%  | Symmetry |
|---|--------|------|--------|--------|--------|--------|----------|
| 1 | 10.402 | MF   | 6611.6 | 255.4  | 0.4314 | 96.334 | 0.716    |
| 2 | 11.487 | FM   | 251.6  | 8.8    | 0.4759 | 3.666  | 0.844    |

(S)-1-(Piperidin-1-yl)-3-(4-(trifluoromethyl)phenyl)butan-1-one (**32**)

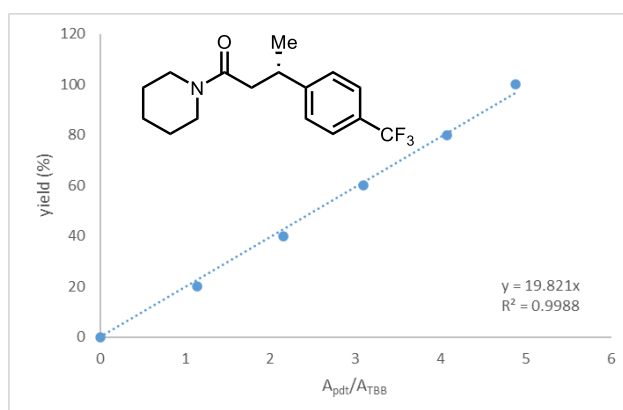

Prepared according to the general procedure 1 using  $\alpha$ -chloro-1-(piperidin-1-yl)ethan-1-one (**1g**, 10  $\mu\text{mol}$ , 2 equiv) and 1-(1-nitroethyl)-4-(trifluoromethyl)benzene (**2j** 5  $\mu\text{mol}$ , 1 equiv) catalyzed by CsER (1 mol%).

**Yields:** run 1: 41%, run 2: 42%, average yield 42%.

**Enantioselectivity:** 85:15 er. Chiral HPLC method: AS-H column, 210 nm, 10% isopropanol/hexanes, flow rate 1.0 mL/min, room temperature,  $t_R$  (minor) = 7.37 min,  $t_R$  (major) = 8.95 min.

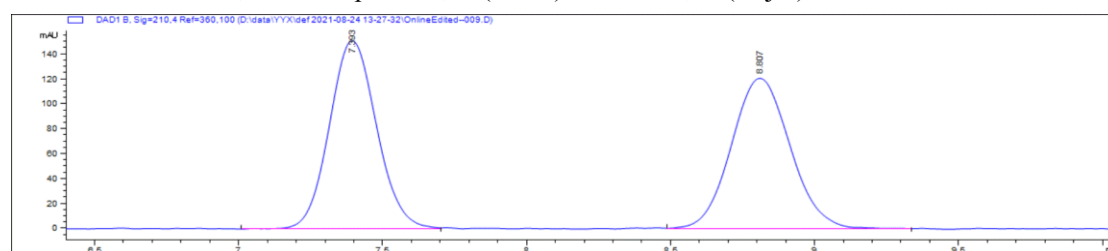

| # | Time  | Type | Area   | Height | Width  | Area%  | Symmetry |
|---|-------|------|--------|--------|--------|--------|----------|
| 1 | 7.393 | VV   | 1737.7 | 151.8  | 0.1755 | 49.905 | 0.902    |
| 2 | 8.807 | VB   | 1744.3 | 121.5  | 0.2256 | 50.095 | 0.9      |

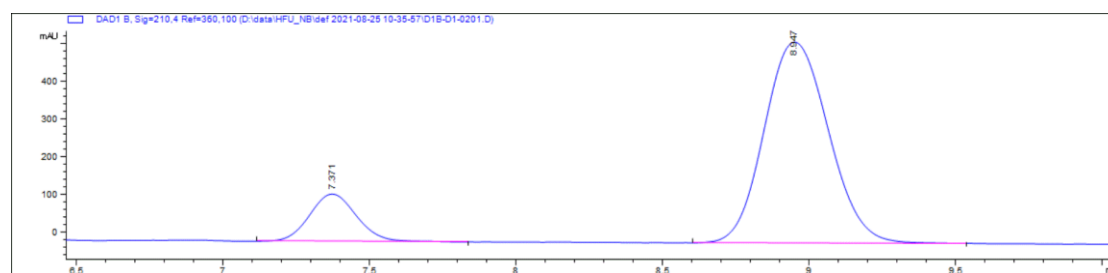

| # | Time  | Type | Area   | Height | Width  | Area%  | Symmetry |
|---|-------|------|--------|--------|--------|--------|----------|
| 1 | 7.371 | VB   | 1415.7 | 126    | 0.1751 | 14.816 | 0.879    |
| 2 | 8.947 | VB   | 8139.7 | 533.4  | 0.24   | 85.184 | 0.863    |



(S)-Morpholino-3-[4-(trifluoromethyl)phenyl]butan-1-one (**33**)

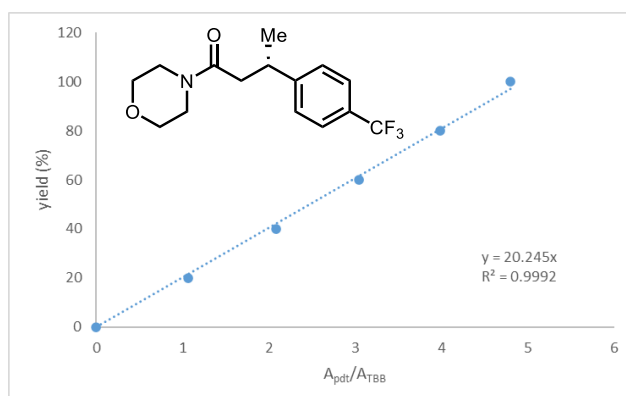

Prepared according to the general procedure 1 using  $\alpha$ -chloro-1-morpholinoethan-1-one (**1h**, 10  $\mu$ mol, 2 equiv) and 1-(1-nitroethyl)-4-(trifluoromethyl)benzene (**2j**, 5  $\mu$ mol, 1 equiv) catalyzed by CsER (1 mol%).

**Yields:** run 1: 77%, run 2: 68%, average yield 73%.

**Enantioselectivity:** 91:9 er. Chiral HPLC method: AS-H column, 210 nm, 10% isopropanol/hexanes, flow rate 1.0 mL/min, room temperature,  $t_R$  (minor) = 9.45 min,  $t_R$  (major) = 11.09 min.

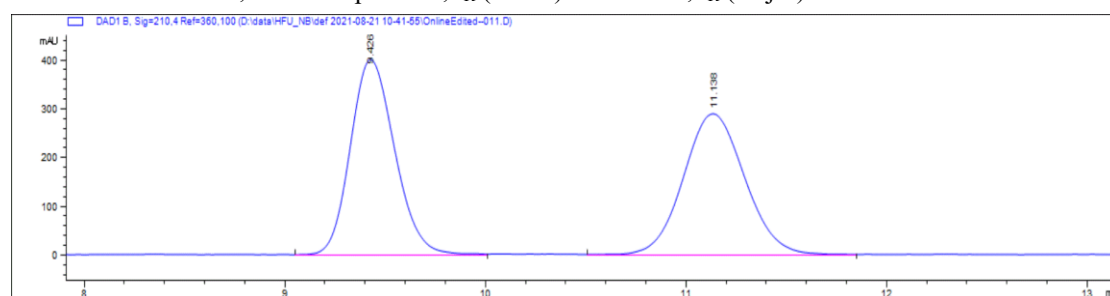

| # | Time   | Type | Area   | Height | Width  | Area%  | Symmetry |
|---|--------|------|--------|--------|--------|--------|----------|
| 1 | 9.426  | VV   | 6215.6 | 400.9  | 0.2429 | 49.867 | 0.801    |
| 2 | 11.138 | VV   | 6248.8 | 289.9  | 0.3315 | 50.133 | 0.911    |

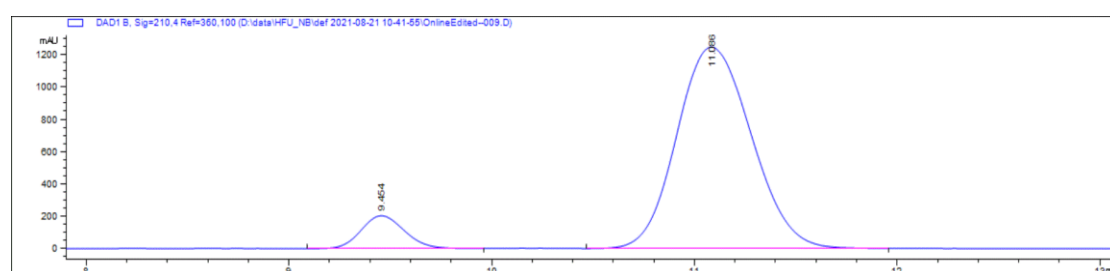

| # | Time   | Type | Area   | Height | Width  | Area%  | Symmetry |
|---|--------|------|--------|--------|--------|--------|----------|
| 1 | 9.454  | VV   | 3151.2 | 206.6  | 0.2379 | 8.879  | 0.841    |
| 2 | 11.086 | VV   | 32339  | 1257.6 | 0.398  | 91.121 | 0.84     |

(S)-Benzyl 3-phenylbutanoate (**34**)

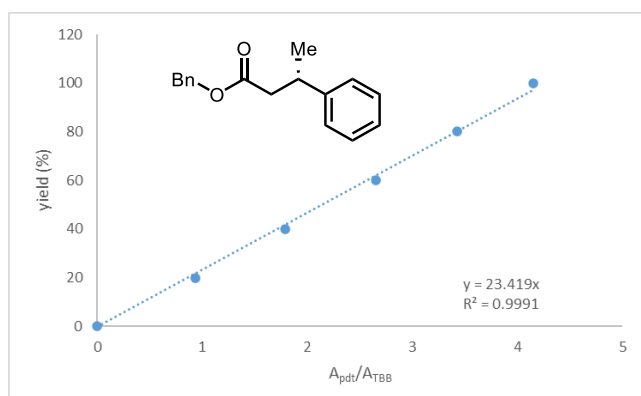

Prepared according to the general procedure 1 using benzyl 2-bromoacetate (**1i**, 15  $\mu\text{mol}$ , 3 equiv) and 1-nitroethylbenzene (**2a**, 5  $\mu\text{mol}$ , 1 equiv) catalyzed by CsER (1 mol%).

**Yields:** run 1: 37%, run 2: 39%, average yield 38%.

**Enantioselectivity:** 86:14 er. Chiral HPLC method: OD-H column, 210 nm, 5% isopropanol/hexanes, flow rate 1.0 mL/min, room temperature,  $t_R$  (major) = 5.74 min,  $t_R$  (minor) = 8.73 min.

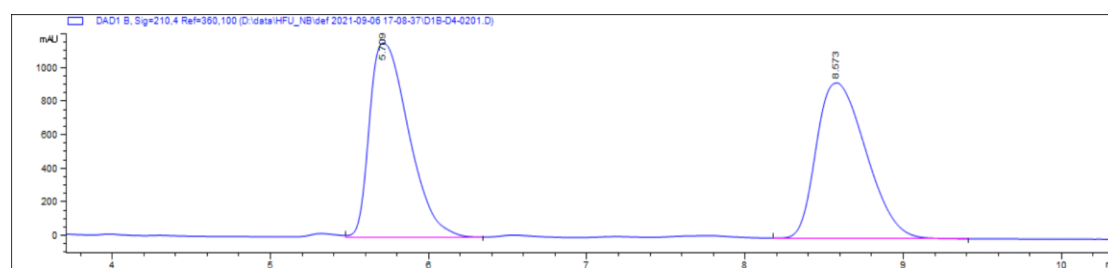

| # | Time  | Type | Area    | Height | Width  | Area%  | Symmetry |
|---|-------|------|---------|--------|--------|--------|----------|
| 1 | 5.709 | VV   | 20005.4 | 1154.7 | 0.2701 | 49.808 | 0.51     |
| 2 | 8.573 | VB   | 20159.7 | 924    | 0.3505 | 50.192 | 0.653    |

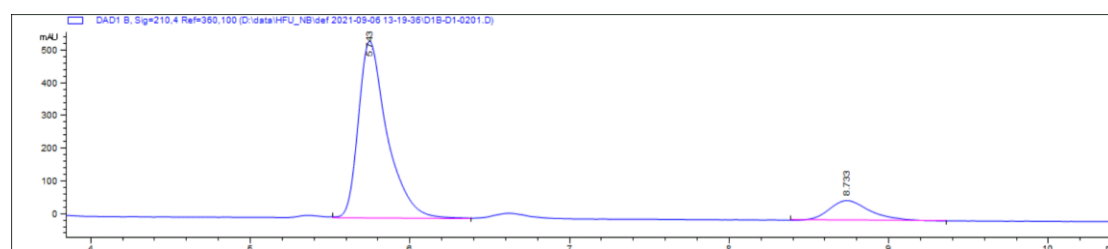

| # | Time  | Type | Area   | Height | Width  | Area%  | Symmetry |
|---|-------|------|--------|--------|--------|--------|----------|
| 1 | 5.743 | VV   | 6783   | 540.8  | 0.1863 | 85.976 | 0.594    |
| 2 | 8.733 | VV   | 1106.4 | 61.2   | 0.273  | 14.024 | 0.707    |

(S)-Benzyl 3-[4-(trifluoromethyl)phenyl]butanoate (**35**)

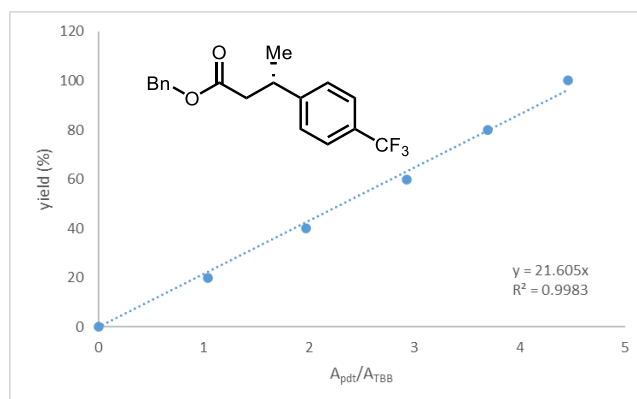

Prepared according to the general procedure 1 using benzyl 2-bromoacetate (**1i**, 15  $\mu$ mol, 3 equiv) and 1-(1-nitroethyl)-4-(trifluoromethyl)benzene (**2j**, 5  $\mu$ mol, 1 equiv) catalyzed by CsER (1 mol%).

**Yields:** run 1: 32%, run 2: 30%, average yield 31%.

**Enantioselectivity:** 88:12 er. Chiral HPLC method: OJ-H column, 210 nm, 10% isopropanol/hexanes, flow rate 1.0 mL/min, room temperature,  $t_R$  (minor) = 6.76 min,  $t_R$  (major) = 7.35 min.

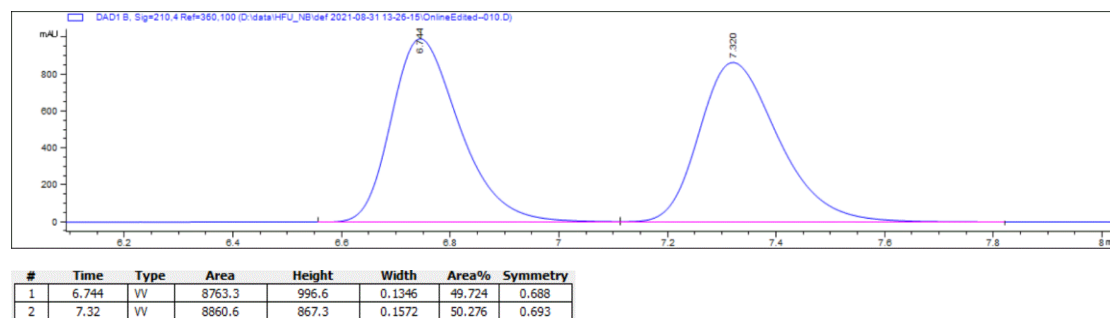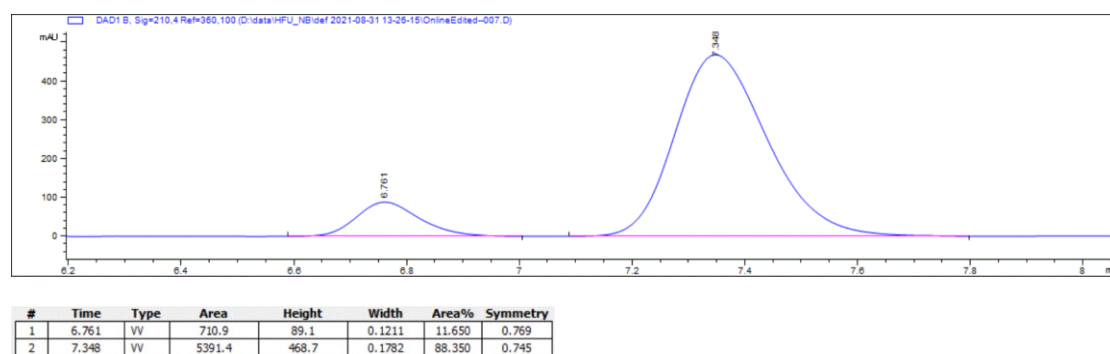

(S)-4-Phenylpentan-2-one (36)

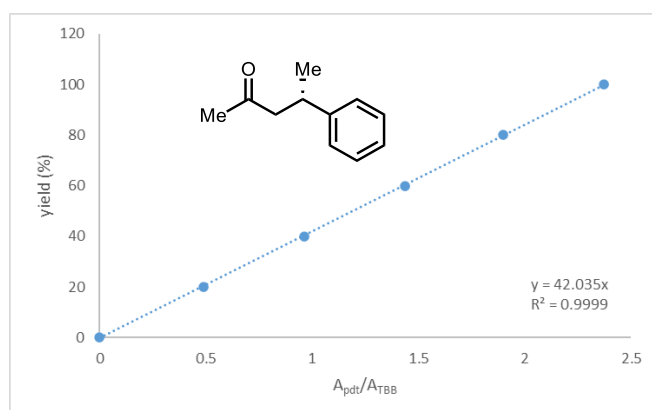

Prepared according to the general procedure 1 using chloroacetone (**1j**, 15  $\mu$ mol, 2 equiv) and 1-nitroethylbenzene (**2a**, 5  $\mu$ mol, 1 equiv) catalyzed by CsER (1 mol%).

**Yields:** run 1: 59%, run 2: 48%, average yield 54%.

**Enantioselectivity:** 96:4 er. Chiral HPLC method: AS-H column, 210 nm, 10% isopropanol/hexanes, flow rate 1.0 mL/min, room temperature,  $t_R$  (major) = 4.89 min,  $t_R$  (minor) = 5.42 min. **Absolute configuration** of the enzymatic product is assigned as *S* by comparison with the previously reported chiral HPLC data.<sup>6</sup>

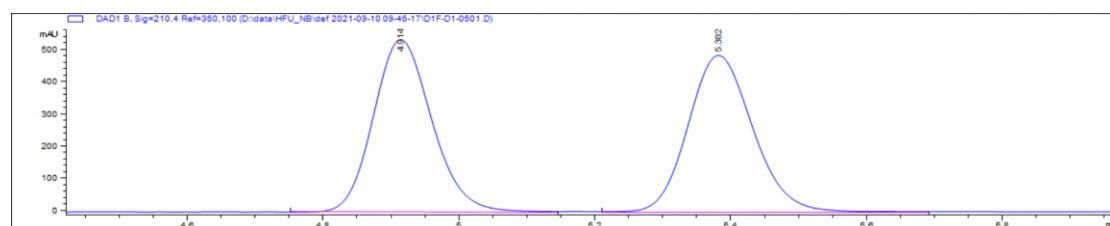

| # | Time  | Type | Area   | Height | Width  | Area%  | Symmetry |
|---|-------|------|--------|--------|--------|--------|----------|
| 1 | 4.914 | VV   | 3252.7 | 540.2  | 0.0942 | 49.771 | 0.833    |
| 2 | 5.382 | VV   | 3282.6 | 490.9  | 0.104  | 50.229 | 0.834    |

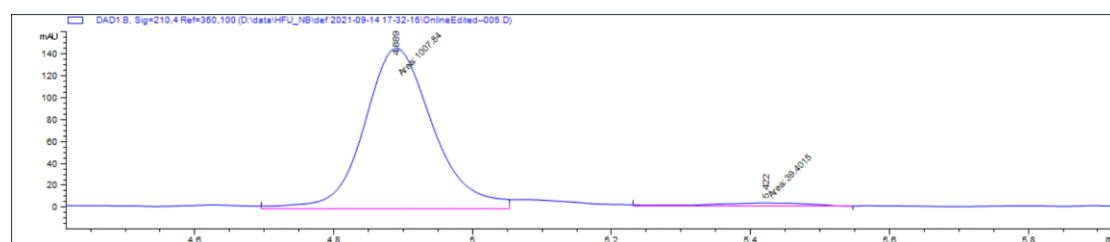

| # | Time  | Type | Area   | Height | Width  | Area%  | Symmetry |
|---|-------|------|--------|--------|--------|--------|----------|
| 1 | 4.889 | MF   | 1007.8 | 146.3  | 0.1148 | 96.238 | 0.855    |
| 2 | 5.422 | MM   | 39.4   | 3.4    | 0.1933 | 3.762  | 1.443    |

(S)-1,3-Diphenylbutan-1-one (**37**)

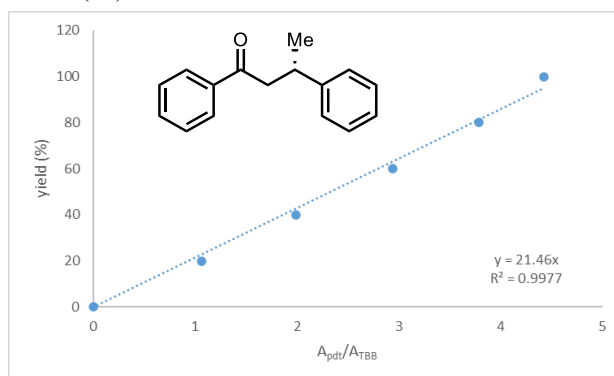

Prepared according to the general procedure 1 using 2-chloro-1-phenylethan-1-one (**1k**, 10  $\mu\text{mol}$ , 2 equiv) and 1-nitroethylbenzene (**2a**, 5  $\mu\text{mol}$ , 1 equiv) catalyzed by CsER (1 mol%).

**Yields:** run 1: 17%, run 2: 16%, average yield 16%.

**Enantioselectivity:** 65:35 er. Chiral HPLC method: OJ-H column, 210 nm, 5% isopropanol/hexanes, flow rate 1.0 mL/min, room temperature,  $t_R$  (major) = 12.31 min,  $t_R$  (minor) = 14.88 min.

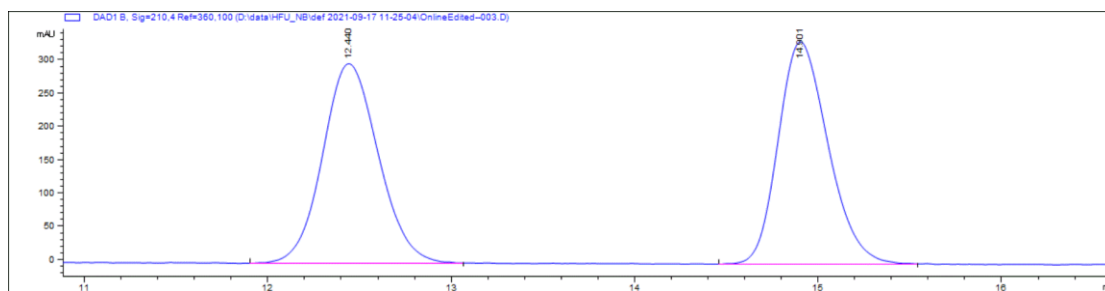

| # | Time   | Type | Area   | Height | Width  | Area%  | Symmetry |
|---|--------|------|--------|--------|--------|--------|----------|
| 1 | 12.44  | VB   | 6471.7 | 303    | 0.3272 | 50.307 | 0.856    |
| 2 | 14.901 | VV   | 6392.7 | 336.8  | 0.2915 | 49.693 | 0.761    |

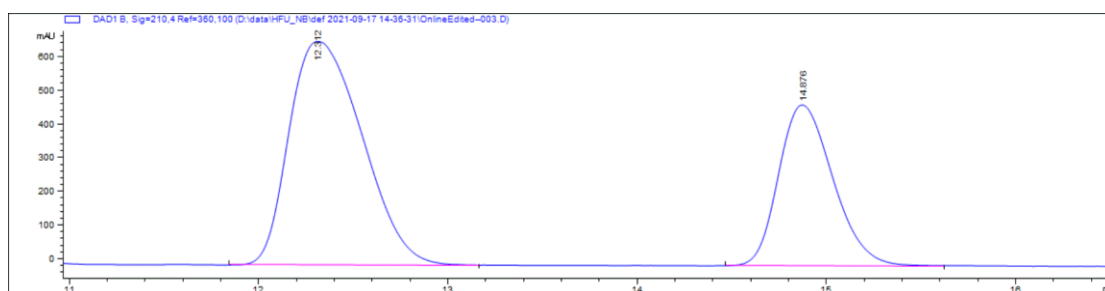

| # | Time   | Type | Area    | Height | Width  | Area%  | Symmetry |
|---|--------|------|---------|--------|--------|--------|----------|
| 1 | 12.312 | BV   | 17788.6 | 661    | 0.432  | 65.066 | 0.625    |
| 2 | 14.876 | VV   | 9550.7  | 476    | 0.3141 | 34.934 | 0.726    |

### Photoenzymatic reaction of $\alpha$ -chloroamide with nitron

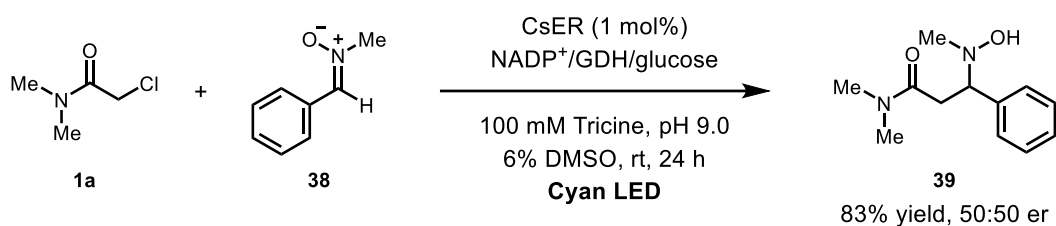

### 3-[Hydroxy(methyl)amino]-*N,N*-dimethyl-3-phenylpropanamide (**39**)

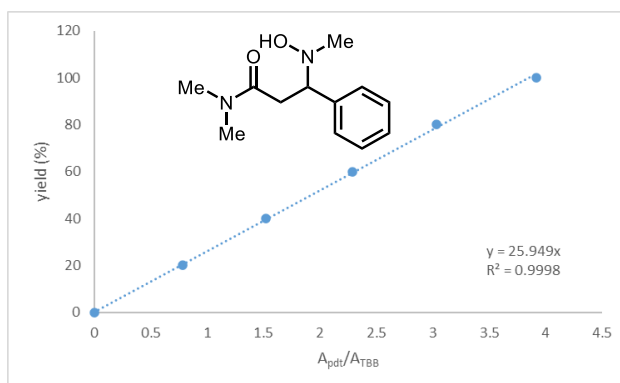

Prepared according to the general procedure 1 using  $\alpha$ -chloro-*N,N*-dimethylacetamide (**1a**, 10  $\mu\text{mol}$ , 2 equiv) and *C*-Phenyl-*N*-methyl-nitron (**38**, 5  $\mu\text{mol}$ , 1 equiv) catalyzed by CsER (1 mol%).

**Yields:** run 1: 84%, run 2: 82%, average yield 83%.

**Enantioselectivity:** 50:50 er. Chiral HPLC method: OJ-H column, 210 nm, 20% isopropanol/hexanes, flow rate 1.0 mL/min, room temperature,  $t_R$  (peak 1) = 5.95 min,  $t_R$  (peak 2) = 8.90 min.

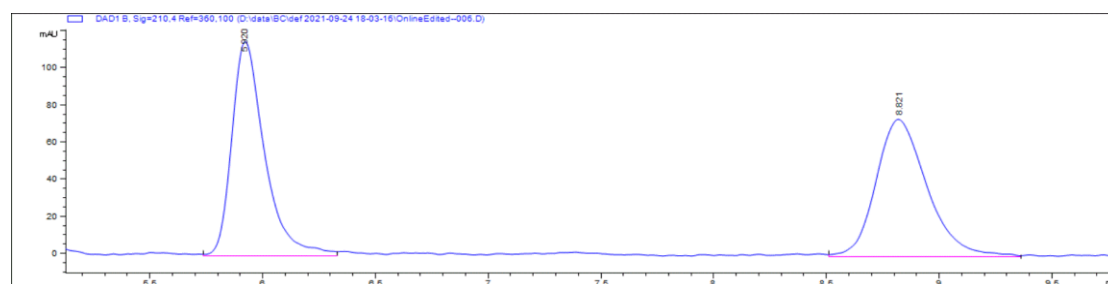

| # | Time  | Type | Area   | Height | Width  | Area%  | Symmetry |
|---|-------|------|--------|--------|--------|--------|----------|
| 1 | 5.92  | VV   | 1183   | 116.1  | 0.1509 | 49.881 | 0.636    |
| 2 | 8.821 | VV   | 1188.7 | 74.5   | 0.2441 | 50.119 | 0.737    |

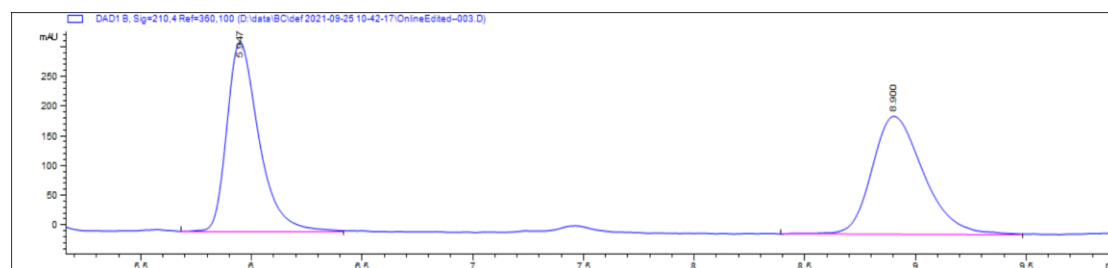

| # | Time  | Type | Area   | Height | Width  | Area%  | Symmetry |
|---|-------|------|--------|--------|--------|--------|----------|
| 1 | 5.947 | VV   | 3266.8 | 321.1  | 0.1547 | 50.082 | 0.638    |
| 2 | 8.9   | VV   | 3256.1 | 199.3  | 0.2526 | 49.918 | 0.712    |

## Derivatization of enzymatic products.

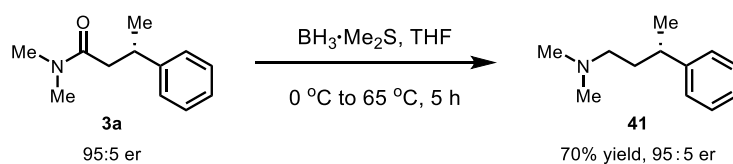

To a stirred solution of enzymatic product **3a** (16 mg, 0.08 mmol, 1 equiv) in dry THF (1 mL) was slowly added  $\text{BH}_3\cdot\text{Me}_2\text{S}$  (2 M solution in THF, 0.12 mL, 0.24 mmol, 3 equiv) under  $\text{N}_2$  atmosphere and cooling with ice bath. The reaction mixture was allowed to warm up to room temperature and then stirred at  $65\text{ }^{\circ}\text{C}$  for 5 hours. After completion of the reaction, the reaction mixture was quenched with saturated  $\text{NH}_4\text{Cl}$  aqueous solution (5 mL) and extracted with EtOAc (3 x 10 mL). The organic layer was collected and dried over  $\text{Na}_2\text{SO}_4$ , filtered and concentrated to give crude product **41**, which was purified by preparative thin layer chromatography (EtOAc/Hexanes, 20%, v/v). Clear oil. 10 mg, 70% yield.

**Enantioselectivity:** 95:5 er. Chiral HPLC method: OJ-H column, 210 nm, 5% isopropanol/hexanes, flow rate 1.0 mL/min, room temperature,  $t_R$  (major) = 12.35 min,  $t_R$  (minor) = 13.03 min.

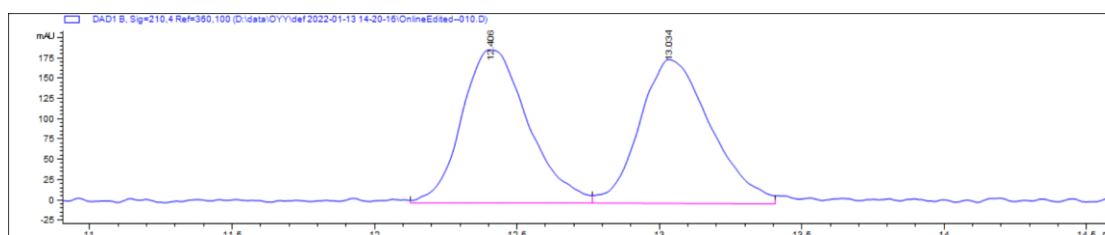

| # | Time   | Type | Area   | Height | Width  | Area%  | Symmetry |
|---|--------|------|--------|--------|--------|--------|----------|
| 1 | 12.406 | VV   | 3092.4 | 189.1  | 0.2427 | 49.986 | 0.749    |
| 2 | 13.034 | VV   | 3094.1 | 177.3  | 0.2216 | 50.014 | 0.696    |

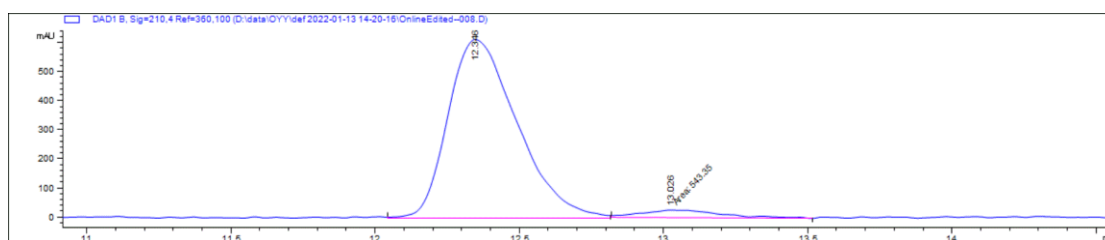

| # | Time   | Type | Area  | Height | Width  | Area%  | Symmetry |
|---|--------|------|-------|--------|--------|--------|----------|
| 1 | 12.346 | VV   | 10261 | 614.3  | 0.2449 | 94.971 | 0.627    |
| 2 | 13.026 | MM   | 543.3 | 26.6   | 0.3402 | 5.029  | 0.533    |

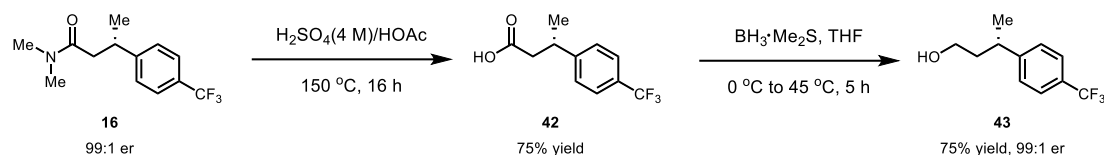

Adapted from the method by A. Link *et al.*<sup>7</sup> The enzymatic product **16** (18 mg, 0.07 mmol) was dissolved in 0.5 mL of mixed acid solution (0.25 mL of 4 M H<sub>2</sub>SO<sub>4</sub> and 0.25 mL of acetic acid) at room temperature. The reaction mixture was stirred at 150 °C for 16 hours. After completion of the reaction, the reaction mixture was diluted with water (2 mL) and basified with saturated Na<sub>2</sub>CO<sub>3</sub> solution, the mixture was extracted with DCM (2 mL). The aqueous layer was acidified using 1 M HCl to pH 2.0 and extracted with EtOAc (4 x 10 mL), the organic layers were collected and dried over Na<sub>2</sub>SO<sub>4</sub>, filtered and concentrated to give the acid product **42**. Light yellow solid. 12 mg, 75% yield.

To a stirred solution of acid **42** (12 mg, 0.05 mmol, 1 equiv) in dry THF (1 mL) was slowly added BH<sub>3</sub>·Me<sub>2</sub>S (2 M solution in THF, 0.15 mL, 0.15 mmol, 3 equiv) under N<sub>2</sub> atmosphere and cooling with an ice bath. The reaction mixture was allowed to warm up to room temperature and then stirred at 45 °C for 5 hours. After completion of the reaction, the reaction mixture was quenched with saturated NH<sub>4</sub>Cl aqueous solution (5 mL) and extracted with EtOAc (3 x 10 mL). The organic layer was collected and dried over Na<sub>2</sub>SO<sub>4</sub>, filtered and concentrated to give crude product **43**, which was purified by preparative thin layer chromatography (EtOAc/Hexanes, 50%, v/v). Clear oil. 8 mg, 75% yield.

**Enantioselectivity:** 99:1 er. Chiral HPLC method: OD-H column, 210 nm, 2% isopropanol/hexanes, flow rate 0.5 mL/min, room temperature, t<sub>R</sub> (major) = 26.39 min, t<sub>R</sub> (minor) = 28.57 min. **Absolute configuration** of the derivatized product **43** is assigned as *S* by comparison with the previously reported chiral HPLC data.<sup>8</sup>

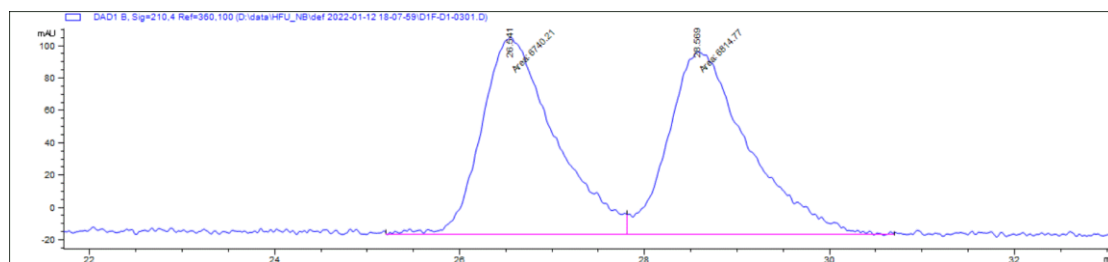

| # | Time   | Type | Area   | Height | Width  | Area%  | Symmetry |
|---|--------|------|--------|--------|--------|--------|----------|
| 1 | 26.541 | MF   | 6740.2 | 121.9  | 0.9214 | 49.725 | 0.633    |
| 2 | 28.569 | FM   | 6814.8 | 112.7  | 1.0074 | 50.275 | 0.571    |

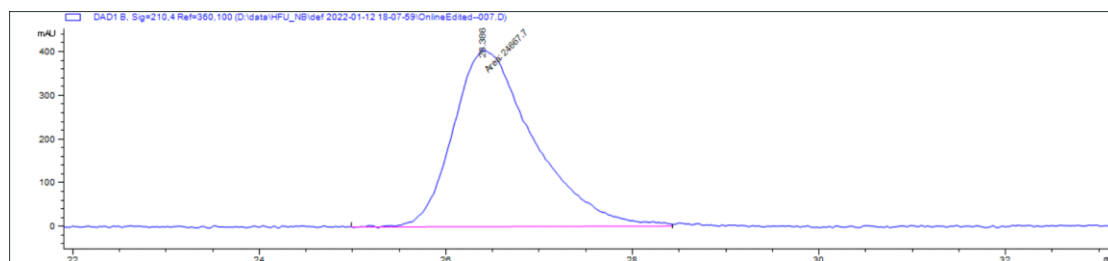

| # | Time   | Type | Area    | Height | Width  | Area%   | Symmetry |
|---|--------|------|---------|--------|--------|---------|----------|
| 1 | 26.386 | MM   | 24667.7 | 409.9  | 1.0029 | 100.000 | 0.56     |



### A. Alkyl halides

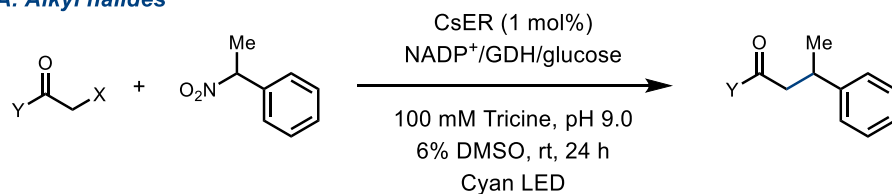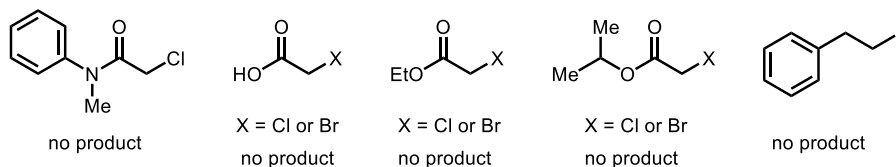

### B. Nitro compounds

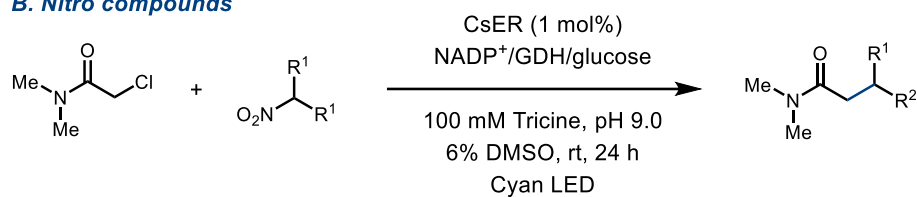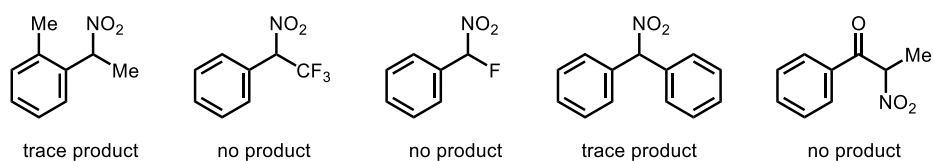

### C. Nitron

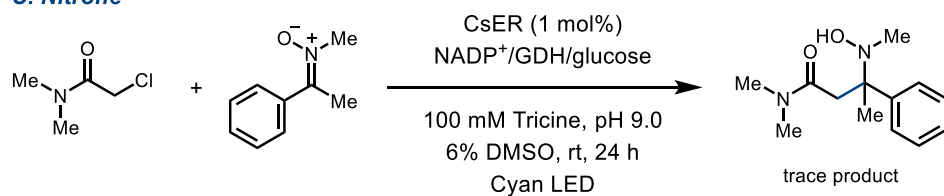

**Supplementary Fig. 2.** (A) Alkyl halides, (B) nitro compounds or (C) nitron substrates not accepted by CsER under standard conditions.

## **Protein crystallography and docking**

### **X-ray crystallographic data of CsER (PDB: 7TNB)**

The expression and purification of wild-type CsER was described above. The purified proteins were concentrated to a final concentration of 1.0 mM, approximately 40 mg/mL. Initial crystallization screens were carried out using Crystal Screen 1 in hanging drop vapor-diffusion crystallization trays (Hampton Research). Crystals grew in 0.15 M ammonium sulfate, 0.1 M sodium acetate, and 25% (w/v) PEG 4000 (Hampton Research). Initial crystals appeared after 7-10 days and continued to grow for the next 14 days. Crystals were cryoprotected in well solution (0.15 M ammonium sulfate, 0.1 M sodium acetate pH 4.6, 20-30% (w/v) PEG 4000) with an additional 20% glycerol and frozen in liquid nitrogen prior to data collection. Diffraction data for wild-type CsER was obtained at the 17-ID-1 (AMX) beamline of NSLS-II using 0.9201 Å wavelength at 100 K to a maximum resolution of 1.79 Å.

All data was integrated with the program XDS<sup>9</sup> and scaled with the program AIMLESS.<sup>10</sup> The structure for wild-type CsER was determined by the method of molecular replacement using the PDB entry 6MYW and the program PHASER.<sup>11</sup> There is one molecule in the asymmetric unit for wild-type CsER. Clear electron density was observed for amino acids 2-354. COOT was used for model building, while structure refinement was carried out with REFMAC 5.8.<sup>12</sup> The final model for wild-type CsER has excellent agreement with the data with an R-factor of 16.8% and an R-free of 19.7% for 3099 atoms. Ramachandran statistics for wild-type CsER show 96% (349) of residues favored, 3% (11) allowed, and less than 1% (2) as outliers. Outliers for wild-type CsER (E55, E286) are well supported by the density.

**Supplementary Table 3.** Data collection and refinement statistics (molecular replacement) of CsER.

|                                | wild-type CsER<br>PDB: 7TNB |
|--------------------------------|-----------------------------|
| <b>Data collection</b>         |                             |
| Data collection wavelength (Å) | 0.9201                      |
| Space group                    | C 2 2 2 <sub>1</sub>        |
| Unit cell dimensions           |                             |
| <i>a, b, c</i> (Å)             | 46.47, 104.18, 144.33       |
| <i>a, b, g</i> (°)             | 90.00, 90.00, 90.00         |
| <b>X-ray diffraction data</b>  |                             |
| Resolution range (Å)           | 30-1.79 (1.83-1.79)*        |
| No. of observed reflections    | 450763 (23517)              |
| No. of unique reflections      | 33499 (1909)                |
| Redundancy                     | 13.3 (12.3)                 |
| Completeness (%)               | 99.8 (97.3)                 |
| CC(1/2)                        | 0.998 (0.745)               |
| <i>R</i> <sub>merge</sub>      | 0.147 (1.390)               |
| <i>R</i> <sub>meas</sub>       | 0.159 (1.513)               |
| <i>R</i> <sub>pim</sub>        | 0.043 (0.425)               |
| <i>I</i> / <i>sI</i>           | 12.9 (1.9)                  |
| <b>Refinement</b>              |                             |
| Resolution (Å)                 | 30-1.8                      |
| Reflections used in refinement | 31797 (2315)                |
| Reflections used for R-free    | 1666 (92)                   |
| <i>R</i> <sub>work</sub>       | 0.168 (0.34)                |
| <i>R</i> <sub>free</sub>       | 0.197 (0.37)                |
| No. atoms                      |                             |
| Protein                        | 2723                        |
| Ligand/ion                     | 82                          |
| Water                          | 294                         |
| <i>B</i> -factors              |                             |
| All                            | 19.46                       |
| Protein                        | 18.97                       |
| Ligand/ion                     | 35.49                       |
| Water                          | 29.61                       |
| R.m.s. deviations              |                             |
| Bond lengths (Å)               | 0.011                       |
| Bond angles (°)                | 1.592                       |
| Ramachandran Statistics        |                             |
| Favored (%)                    | 96                          |
| Allowed (%)                    | 3                           |
| Outliers (%)                   | <1                          |
| Rotamer outliers (%)           | 2                           |
| Clashscore                     | 3                           |

\*One crystal was used to generate this structure. Values in parentheses are for highest-resolution shell.

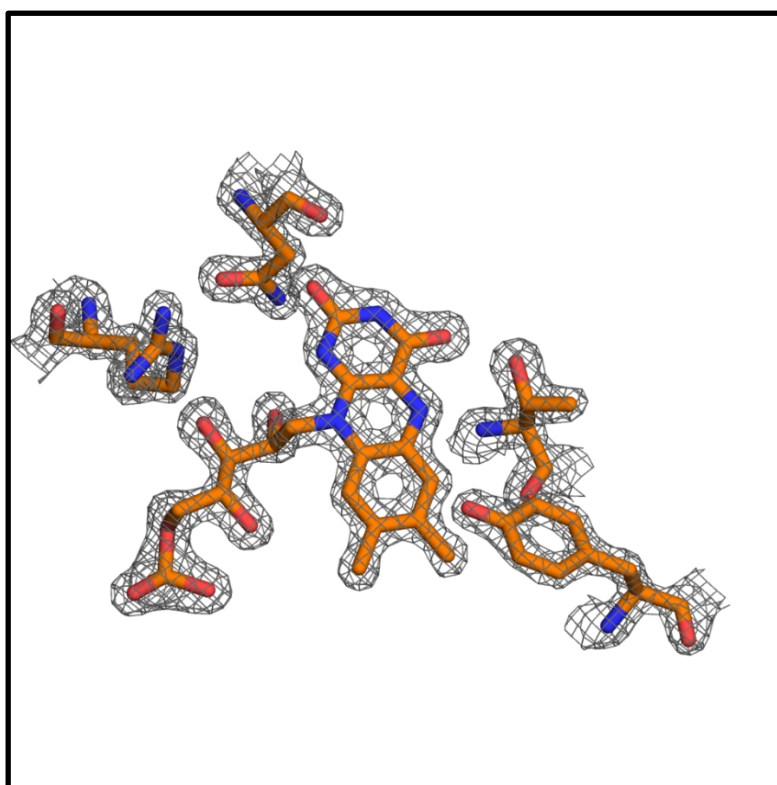

**Supplementary Fig. 3.** A sample electron density map (2FO-FC) for WT CsER (PDB: 7TNB). The quality of the map is high, and the FMN is well-supported by electron density.

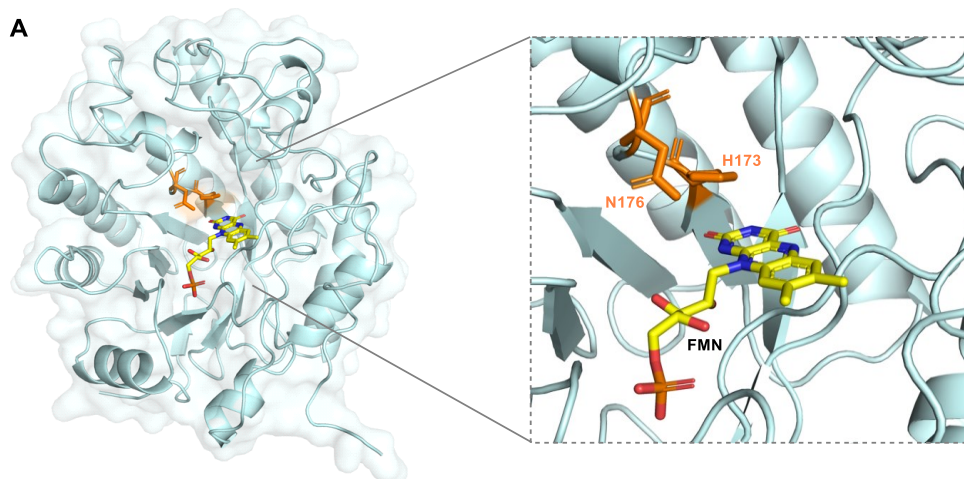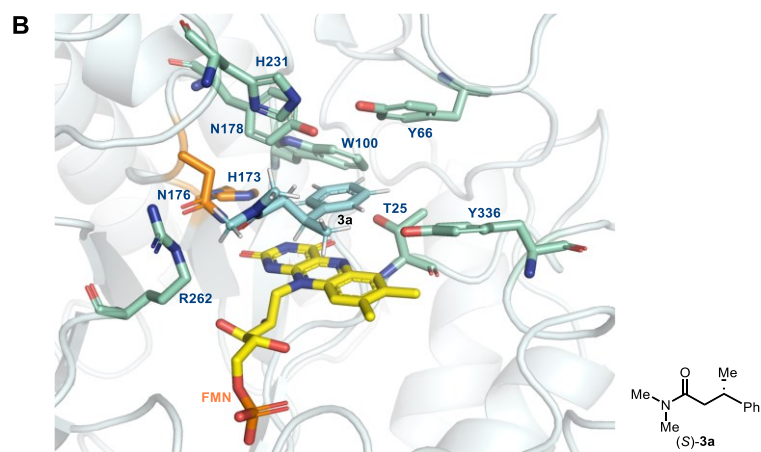

**Supplementary Fig. 4.** (A) Overall crystal structure and active site of wild-type CsER (PDB code: 7TNB). Residues H173 and N176 responsible for substrate binding and cofactor FMN are labeled. (B) A close-up of the active site of wild-type CsER using the docking model of CsER with the product (S)-3a. Docking was performed with AutoDock Vina.<sup>13</sup> PyMOL was used for graph preparation.

## Deuterium labeling experiments

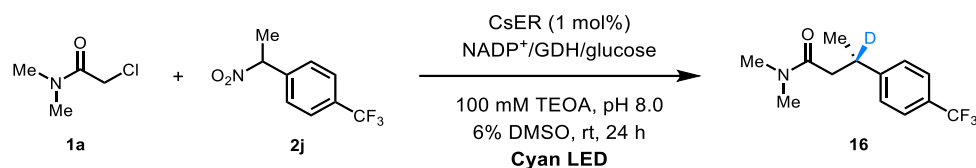

In the Coy<sup>®</sup> chamber (Vinyl Anaerobic Chamber, Type A), a 20 mL glass vial with screw cap was charged with GDH (3 mg), either *d*<sub>1</sub>-glucose or *h*<sub>1</sub>-glucose (45 mg), NADP<sup>+</sup> (0.5 mg), CsER (1 mol%),  $\alpha$ -chloroamide (**1a**, 250  $\mu$ L, 800 mM stock in DMSO, 0.20 mmol, 4 equiv) and 1-(1-nitroethyl)-4-(trifluoromethyl)benzene (**2j**, 250  $\mu$ L, 200 mM stock in DMSO, 0.05 mmol, 1 equiv). Triethanolamine (TEOA) buffer (100 mM pH 8.0, in either H<sub>2</sub>O or D<sub>2</sub>O) was added to bring the total volume to 8 mL with 6% DMSO (*v/v*) as cosolvent. The vial was sealed with a screw cap and brought out of the Coy<sup>®</sup> chamber where it is placed on a stir plate at 200 rpm under a fan and irradiated with cyan LEDs for 24 hours (reaction setup see Supplementary Fig. 1B). Upon completion, the reaction was quenched with 16 mL of acetonitrile. The mixture was shaken for 30 min, centrifuged (12000  $\times$  g, 5 mins), and the supernatant was filtered, concentrated, and extracted with DCM (3  $\times$  10 mL). The combined organic layers were dried over Na<sub>2</sub>SO<sub>4</sub>, filtered, and concentrated under reduced pressure to provide the crude product, which was purified by preparative TLC (EtOAc/Hexanes, 50%, *v/v*). The purified enzymatic product was dissolved in CDCl<sub>3</sub> for quantitative <sup>1</sup>H NMR analysis. The benzylic proton peaks were integrated from 3.42 – 3.49 ppm. Other aliphatic protons were used as references.

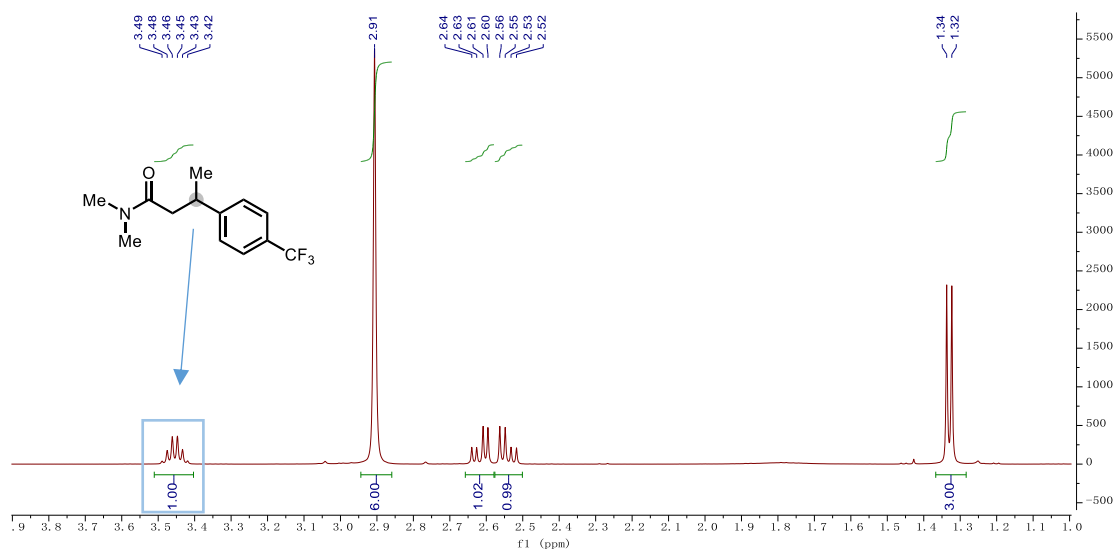

Supplementary Fig. 5. <sup>1</sup>H NMR of the aliphatic region of product standard.

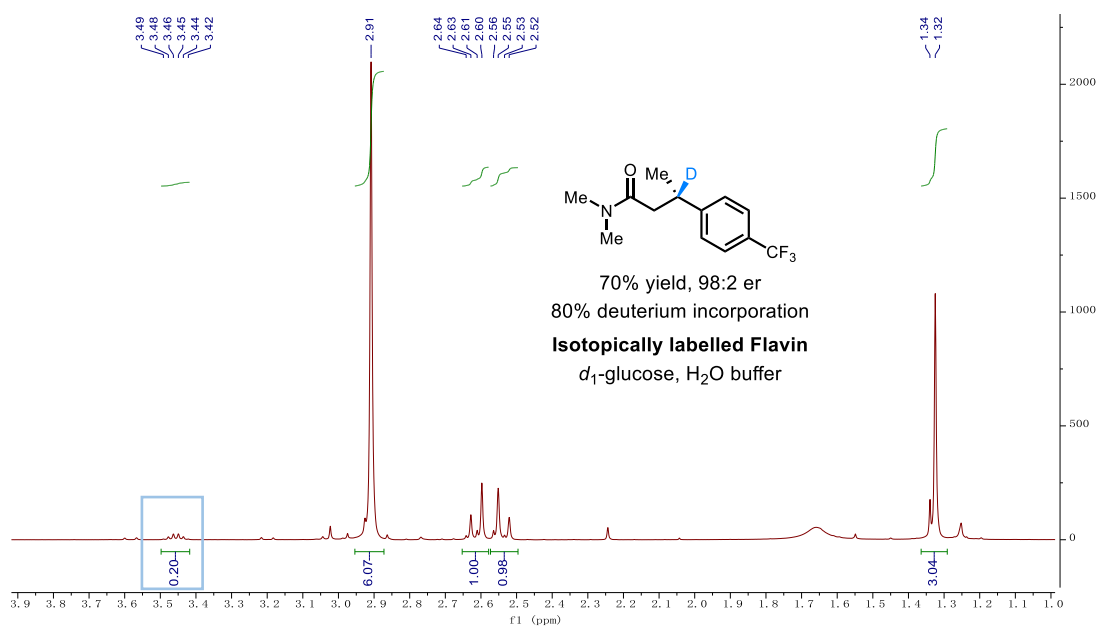

**Supplementary Fig. 6.**  $^1H$  NMR of the aliphatic region of the enzymatic product obtained from  $d_1$ -glucose in  $H_2O$  buffer (100 mM TEOA, pH 8.0). 80% deuterium incorporation was observed at the benzylic position.

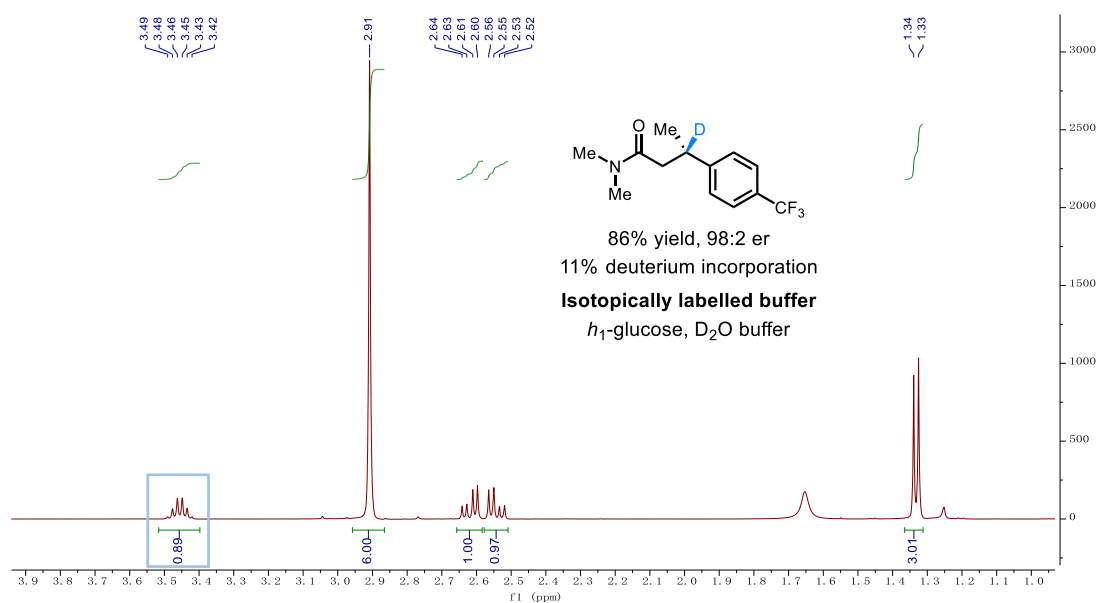

**Supplementary Fig. 7.**  $^1H$  NMR of the aliphatic region of the enzymatic product obtained from  $h_1$ -glucose in  $D_2O$  buffer (100 mM TEOA, pH 8.0). 11% deuterium incorporation was observed at the benzylic position.

### Summary and discussion of the results of deuterium labeling experiments

To elucidate the terminal hydrogen atom source, we conducted a set of deuterium-labeling experiments. When flavin was labeled *in situ* using *d*<sub>1</sub>-glucose with the turnover system, deuterium (80% incorporation) was labeled exclusively at the benzylic position of **16** with good yield and excellent enantioselectivity (70% yield, 98:2 er, Supplementary Fig. 6). In contrast, when the reaction was carried out with *h*<sub>1</sub>-glucose in deuterated buffer, only 11% deuterium incorporation at the benzylic position of **16** was observed with 86% yield, 98:2 er Supplementary Fig. 7). Collectively, these results suggest with CsER, the radical termination occurs primarily through hydrogen atom transfer (HAT) from flavin (FMN<sub>sq</sub>).

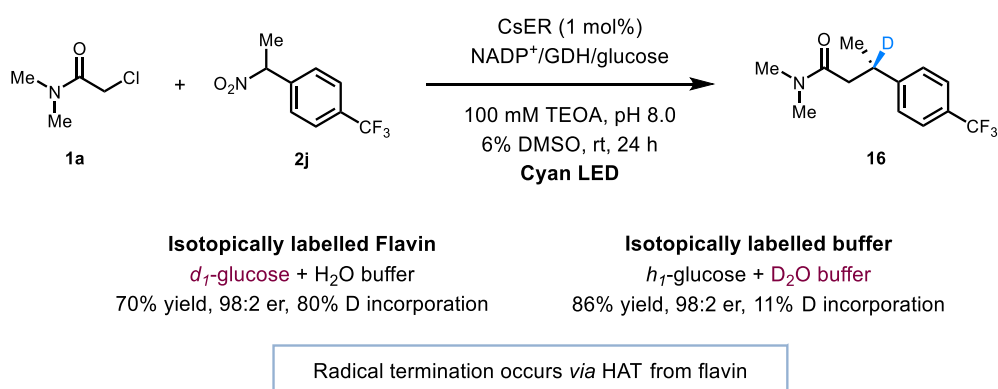

**Supplementary Fig. 8.** Summary of the results of deuterium labeling experiments.



## Spectroscopic experiments

**General comments.** All samples were prepared in an MBraun<sup>®</sup> glovebox with O<sub>2</sub> level less than 1 ppm. Custom designed quartz cuvettes with a 10 mm path length and a JY valve were used to maintain oxygen-free conditions for the duration of the experiments. At each distinct stage for measuring CT complexes, solutions were filtered through a 0.2 μm syringe filter. Spectra were obtained on a Cary 60 UV-Vis spectrophotometer.

### UV-Vis spectra of reduced CsER with $\alpha$ -chloroamide 1a + nitrone 38

A blank solution of degassed Tricine buffer (100 mM, pH 9.0) was prepared and used to obtain a baseline spectrum. A 50 μM solution of enzyme was prepared by mixing CsER (200 nmol, 1 equiv) with degassed Tricine buffer (the total volume is 4 mL) in an anaerobic chamber and filtered through a syringe filter before a spectrum was taken of the oxidized CsER. The oxidized FMN cofactor was reduced by the addition of 60 μL of 4 mM sodium dithionite (240 nmol, 1.2 equiv) in Tricine buffer (100 mM, pH 9.0). Following filtration through a syringe filter, a spectrum of the reduced CsER was obtained. To detect the presence of a charge-transfer complex, 100 μmol of  $\alpha$ -chloroamide (12.1 mg, 500 equiv) was added to the reduced CsER solution and filtered through a syringe filter. A spectrum of reduced CsER (FMN<sub>hq</sub>) with  $\alpha$ -chloroamide was then obtained. Subsequently, 40 μmol of nitrone (5.5 mg, 200 equiv) dissolved in isopropanol (150 μL) was added to the system and filtered through a syringe filter. A spectrum of reduced CsER (FMN<sub>hq</sub>) with both  $\alpha$ -chloroamide and nitrone was then obtained. The overlaid spectra are shown in the main text in Fig. 4a.

### UV-Vis spectra of reduced CsER with nitrone 38 + $\alpha$ -chloroamide 1a

A blank solution of degassed Tricine buffer (100 mM, pH 9.0) was prepared and used to obtain a baseline spectrum. A 50  $\mu$ M solution of enzyme was prepared by mixing CsER (200 nmol, 1 equiv) with degassed Tricine buffer (the total volume is 4 mL) in an anaerobic chamber and filtered through a syringe filter before a spectrum was taken of the oxidized CsER. The oxidized FMN cofactor was reduced by the addition of 60  $\mu$ L of 4 mM sodium dithionite (240 nmol, 1.2 equiv) in Tricine buffer (100 mM, pH 9.0). Following filtration through a syringe filter, a spectrum of the reduced CsER was obtained. To detect the presence of a charge transfer-complex, 40  $\mu$ mol of nitrone (5.5 mg, 200 equiv) dissolved in isopropanol (150  $\mu$ L) was added to the reduced CsER solution and filtered through a syringe filter. A spectrum of reduced CsER (FMN<sub>hq</sub>) with nitrone was then obtained. Subsequently, 100  $\mu$ mol of  $\alpha$ -chloroamide (12.1 mg, 500 equiv) was added to the system and filtered through a syringe filter. A spectrum of reduced CsER (FMN<sub>hq</sub>) with both nitrone and  $\alpha$ -chloroamide was then obtained. The overlaid spectra are shown in Supplementary Fig. 9. Although no CT complex was observed between reduced CsER<sub>hq</sub> with nitrone, a CT complex was observed between reduced CsER<sub>hq</sub> with both nitrone and  $\alpha$ -chloroamide.

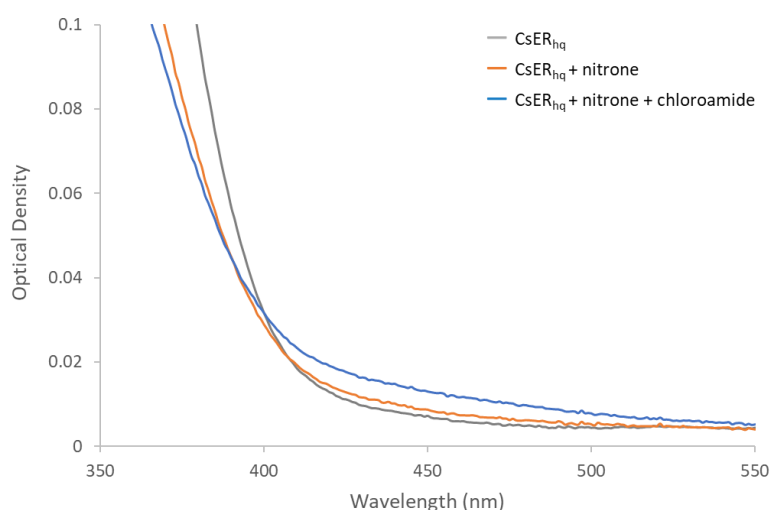

**Supplementary Fig. 9.** UV-Vis absorption traces of CsER in the presence of nitrone and  $\alpha$ -chloroamide.

### UV-Vis spectra of reduced CsER with nitroalkane 2a

A blank solution of degassed Tricine buffer (100 mM, pH 9.0) was prepared and used to obtain a baseline spectrum. A 50  $\mu$ M solution of enzyme was prepared by mixing CsER (200 nmol, 1 equiv) with degassed Tricine buffer (the total volume is 4 mL) in an anaerobic chamber and filtered through a syringe filter before and a spectrum was taken of the oxidized CsER. The oxidized FMN cofactor was reduced by the addition of 60  $\mu$ L of 4 mM sodium dithionite (240 nmol, 1.2 equiv) in Tricine buffer (100 mM, pH 9.0). Following filtration through a syringe filter, a spectrum of the reduced CsER was obtained. Subsequently, 20  $\mu$ mol of nitroalkane (**2a**, 3.0 mg, 100 equiv) dissolved in isopropanol (150  $\mu$ L) was added to the reduced CsER solution and filtered through a syringe filter. A spectrum of reduced CsER (FMN<sub>hq</sub>) with nitroalkane was then obtained. The overlaid spectra are shown in Supplementary Fig. 10. We attribute the absorption band around 450 nm – 500 nm of the reduced CsER with nitroalkane (blue line) to a mixture of flavin quinone and flavin semiquinone.

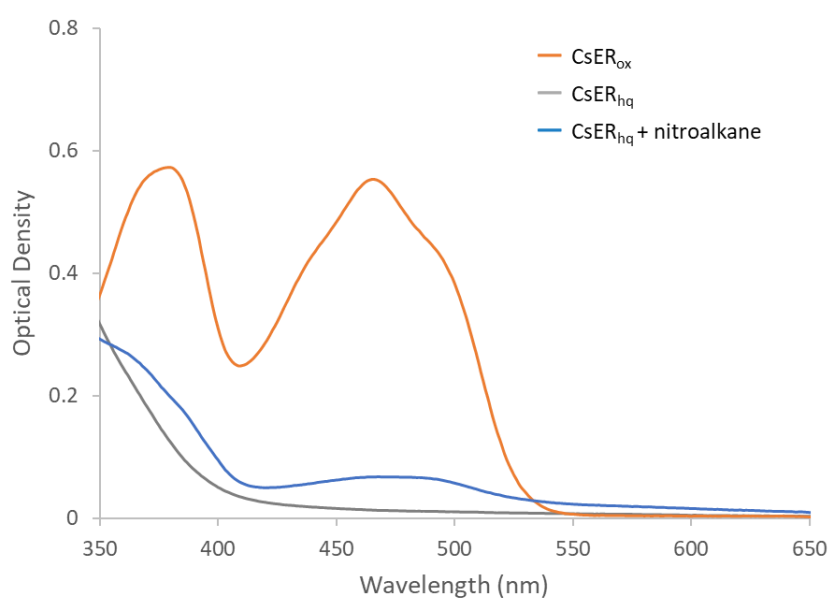

**Supplementary Fig. 10.** UV-Vis absorption traces of CsER in the presence of nitroalkane.

### UV-Vis spectra of free FMN with $\alpha$ -chloroamide 1a and nitrone 38

A blank solution of degassed Tricine buffer (100 mM, pH 9.0) was prepared and used to obtain a baseline spectrum. A 30  $\mu$ M solution of FMN was prepared by FMN (120 nmol, 1 equiv) with degassed Tricine buffer (the total volume is 4 mL) in an anaerobic chamber and filtered through a syringe filter before and a spectrum was taken of the oxidized FMN. The oxidized FMN cofactor was reduced by the addition of 36  $\mu$ L of 4 mM sodium dithionite (144 nmol, 1.2 equiv) in Tricine buffer (100 mM, pH 9.0). Following filtration through a syringe filter, a spectrum of the reduced FMN was obtained. To detect the presence of a charge-transfer complex, 100  $\mu$ mol of  $\alpha$ -chloroamide (11.7 mg, 800 equiv) was added to the reduced CsER solution and filtered through a syringe filter. A spectrum of reduced FMN<sub>hq</sub> with  $\alpha$ -chloroamide was then obtained. Subsequently, 40  $\mu$ mol of nitrone (5.0 mg, 300 equiv) dissolved in isopropanol (150  $\mu$ L) was added to the system and filtered through a syringe filter. A spectrum of reduced FMN<sub>hq</sub> with both  $\alpha$ -chloroamide and nitrone was then obtained. The overlaid spectra are shown in the main text in Supplementary Fig. 11. No CT complex was observed between reduced FMN<sub>hq</sub> with  $\alpha$ -chloroamide and nitrone.

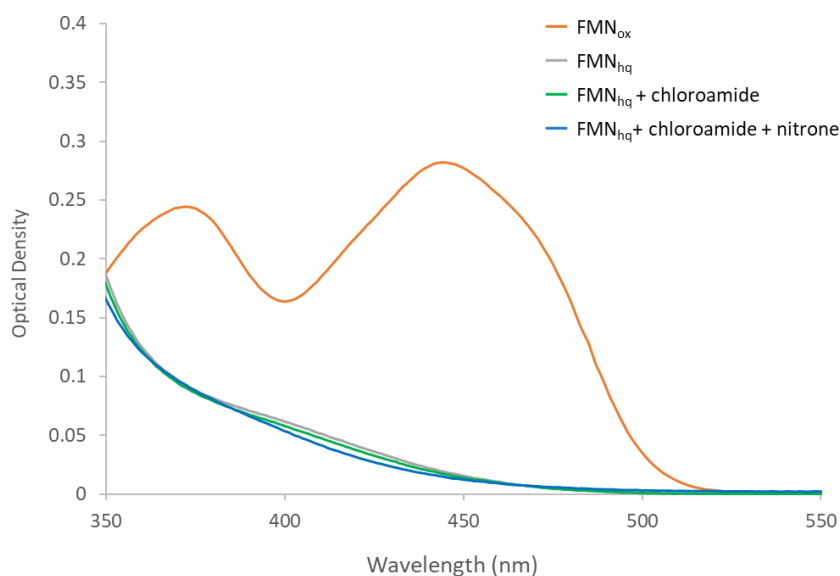

**Supplementary Fig. 11.** UV-Vis absorption traces of free FMN in the presence of  $\alpha$ -chloroamide and nitrone.

**Supplementary Table 4.** Direction reduction of  $\alpha$ -chloroamide by EREDs.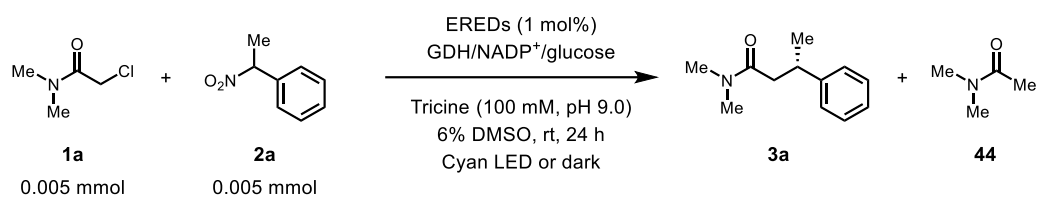

| Entry | ERED       | Substrate             | Light | Yield <sup>a</sup> of <b>3a</b> | Yield of <b>44</b> |
|-------|------------|-----------------------|-------|---------------------------------|--------------------|
| 1     | CsER       | <b>1a</b> + <b>2a</b> | cyan  | 51%                             | 21%                |
| 2     | CsER       | <b>1a</b> + <b>2a</b> | dark  | 0%                              | 0%                 |
| 3     | GluER-T36A | <b>1a</b> + <b>2a</b> | cyan  | 38%                             | 16%                |
| 4     | GluER-T36A | <b>1a</b> + <b>2a</b> | dark  | 0%                              | 0%                 |
| 5     | CsER       | <b>1a</b>             | cyan  | 0%                              | 48%                |
| 6     | CsER       | <b>1a</b>             | dark  | 0%                              | 0%                 |
| 7     | GluER-T36A | <b>1a</b>             | cyan  | 0%                              | 15%                |
| 8     | GluER-T36A | <b>1a</b>             | dark  | 0%                              | 0%                 |

Reaction conditions:  $\alpha$ -chloroamide (**1a**, 0.6 mg, 5  $\mu$ mol, 1 equiv), 1-nitroethylbenzene (**2a**, 0.76 mg, 5  $\mu$ mol, 1 equiv), GDH (0.3 mg), NADP<sup>+</sup> (0.05  $\mu$ mol, 1 mol%), glucose (25  $\mu$ mol) and purified enzyme (0.05  $\mu$ mol, 1 mol%) in tricine buffer (100 mM, pH 9.0), with 6% DMSO as cosolvent, final total volume is 800  $\mu$ L. Reaction mixtures were irradiated with cyan LEDs or covered by aluminum foil under anaerobic conditions at room temperature for 24 h. <sup>a</sup> Yields (average of duplicate) of **3a** and **44** were determined *via* LCMS relative to an internal standard (TBB).

**Supplementary Table 5.** Specific activity of CsER and GluER-T36A for the model reaction.

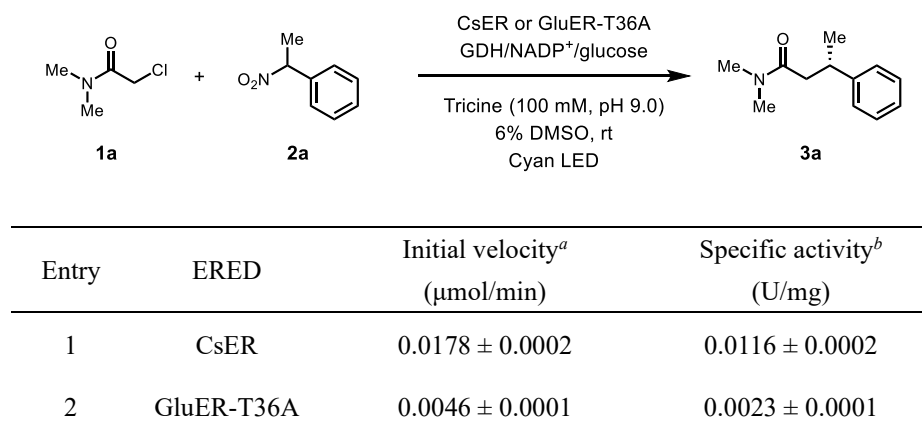

Reaction conditions:  $\alpha$ -chloroamide (**1a**, 0.12 mg, 10  $\mu\text{mol}$ , 2 equiv), 1-nitroethylbenzene (**2a**, 0.76 mg, 5  $\mu\text{mol}$ , 1 equiv), GDH (0.3 mg), NADP<sup>+</sup> (0.05  $\mu\text{mol}$ , 1 mol%), glucose (25  $\mu\text{mol}$ ) and purified CsER (0.04  $\mu\text{mol}$ , 0.8 mol%) or GluER-T36A (0.05  $\mu\text{mol}$ , 1 mol%) in tricine buffer (100 mM, pH 9.0), with 6% DMSO as cosolvent, final total volume is 800  $\mu\text{L}$ . Reaction mixtures were irradiated with cyan LEDs under anaerobic conditions at room temperature. Yield (triplicate) of **3a** was determined *via* LCMS relative to an internal standard (TBB).

**Note:** <sup>a</sup>Initial rate of the enzymatic reaction was calculated over the time period of 0–30 min for CsER and 0–20 min for GluER-T36A respectively. <sup>b</sup>For calculation of specific activity, one unit ( $\mu\text{mol}/\text{min}$ ) was defined as the amount of biocatalyst required for forming 1  $\mu\text{mol}$  of product **3a** per minute.

### Synthesis of substrates

Substrates 2-chloro-*N*-methylacetamide (**1b**), benzyl 2-bromoacetate (**1i**), 1-chloropropan-2-one (**1j**), 2-chloro-1-phenylethan-1-one (**1k**), (nitromethyl)benzene (**2l**), ethyl 2-nitropropanoate (**2s**) are commercially available from Sigma-Aldrich.

### Synthesis of $\alpha$ -chloroamide substrates

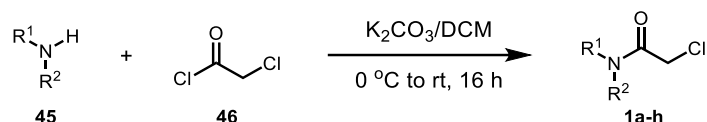

**General procedure.** To a stirred solution of amine (**45**, 5 mmol, 1 equiv) in dry DCM (20 mL) was added  $\text{K}_2\text{CO}_3$  (15 mmol, 3 equiv), then  $\alpha$ -chloroacetyl chloride (**46**, 6 mmol, 1.2 equiv) was added dropwise to the reaction mixture under nitrogen atmosphere at 0 °C, the reaction mixture was warmed up to room temperature and further stirred over 16 hours. After completion of the reaction, the mixture was filtered, and the filtrate was collected and concentrated *in vacuo* to give a crude product, which was further purified by flash chromatography (EtOAc/Hexanes, 30–70%, *v/v*).

#### 2-Chloro-*N,N*-dimethylacetamide (**1a**)

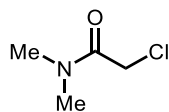

Clear oil. 540 mg, 89% yield.

$^1\text{H NMR}$  (500 MHz,  $\text{CDCl}_3$ )  $\delta$  4.07 (s, 2H), 3.09 (s, 3H), 2.98 (s, 3H).

$^{13}\text{C NMR}$  (126 MHz,  $\text{CDCl}_3$ )  $\delta$  166.6, 41.3, 37.7, 36.1.

The NMR spectra is in agreement with published data.<sup>14</sup>

#### *N*-Benzyl-2-chloroacetamide (**1c**)

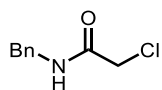

White solid. 730 mg, 80% yield.

$^1\text{H NMR}$  (500 MHz,  $\text{CDCl}_3$ )  $\delta$  7.39 – 7.33 (m, 2H), 7.33 – 7.27 (m, 3H), 6.90 (s, 1H), 4.49 (d,  $J$  = 5.8 Hz, 2H), 4.09 (s, 2H).

$^{13}\text{C NMR}$  (126 MHz,  $\text{CDCl}_3$ )  $\delta$  165.9, 137.4, 129.0, 127.9, 127.9, 44.0, 42.7.

The NMR spectra is in agreement with published data.<sup>15</sup>

#### *N*-Benzyl-2-chloro-*N*-methylacetamide (**1d**)

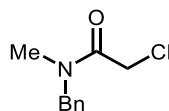

White solid. 837 mg, 85% yield.

$^1\text{H}$  NMR (500 MHz,  $\text{CDCl}_3$ )  $\delta$  7.41 – 7.28 (m, 3H), 7.26 – 7.17 (m, 2H), 4.61 (s, 2H), 4.15 (s, 1.2H), 4.11 (s, 0.8H), 3.00 (s, 1.8H), 2.97 (s, 1.2H). Major rotamer:minor rotamer = 1.5:1.

$^{13}\text{C}$  NMR (126 MHz,  $\text{CDCl}_3$ )  $\delta$  167.1, 166.8, 136.6, 135.9, 129.2, 128.9, 128.2, 128.1, 127.8, 126.6, 53.8, 51.5, 41.5, 41.2, 35.2, 34.5.

The NMR spectra is in agreement with published data.<sup>16</sup>

#### 2-Chloro-*N*-methoxy-*N*-methylacetamide (**1e**)

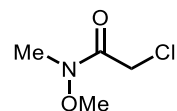

Clear oil. 356 mg, 52% yield.

$^1\text{H}$  NMR (500 MHz,  $\text{CDCl}_3$ )  $\delta$  4.23 (s, 2H), 3.74 (s, 3H), 3.22 (s, 3H).

$^{13}\text{C}$  NMR (126 MHz,  $\text{CDCl}_3$ )  $\delta$  167.7, 61.8, 40.9, 32.7.

The NMR spectra is in agreement with published data.<sup>16</sup>

#### 2-Chloro-1-(pyrrolidin-1-yl)ethan-1-one (**1f**)

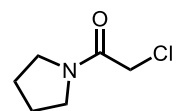

Clear oil. 478 mg, 65% yield.

$^1\text{H}$  NMR (500 MHz,  $\text{CDCl}_3$ )  $\delta$  4.01 (s, 2H), 3.51 (dt,  $J = 9.2, 6.9$  Hz, 4H), 1.99 (p,  $J = 6.9$  Hz, 2H), 1.88 (p,  $J = 6.9$  Hz, 2H).

$^{13}\text{C}$  NMR (126 MHz,  $\text{CDCl}_3$ )  $\delta$  164.9, 46.8, 46.5, 42.2, 26.3, 24.3.

The NMR spectra is in agreement with published data.<sup>16</sup>

#### 2-Chloro-1-(piperidin-1-yl)ethan-1-one (**1g**)

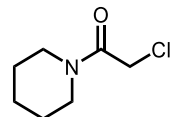

White solid. 603 mg, 75% yield.

$^1\text{H}$  NMR (500 MHz,  $\text{CDCl}_3$ )  $\delta$  4.06 (s, 2H), 3.59 – 3.52 (m, 2H), 3.48 – 3.39 (m, 2H), 1.69 – 1.60 (m, 4H), 1.60 – 1.53 (m, 2H).

$^{13}\text{C}$  NMR (126 MHz,  $\text{CDCl}_3$ )  $\delta$  165.0, 47.6, 43.4, 41.3, 26.5, 25.5, 24.4.

The NMR spectra is in agreement with published data.<sup>17</sup>

#### 2-Chloro-1-morpholinoethan-1-one (**1h**)

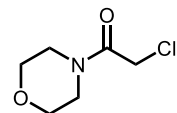



White solid. 570 mg, 70% yield.

$^1\text{H}$  NMR (500 MHz,  $\text{CDCl}_3$ )  $\delta$  4.06 (s, 2H), 3.71 (dt,  $J = 12.9, 4.8$  Hz, 4H), 3.63 (t,  $J = 4.8$  Hz, 2H), 3.53 (t,  $J = 4.8$  Hz, 2H).

$^{13}\text{C}$  NMR (126 MHz,  $\text{CDCl}_3$ )  $\delta$  165.4, 66.8, 66.6, 46.9, 42.6, 40.7.

The NMR spectra is in agreement with published data.<sup>17</sup>

### Synthesis of nitroalkane substrates

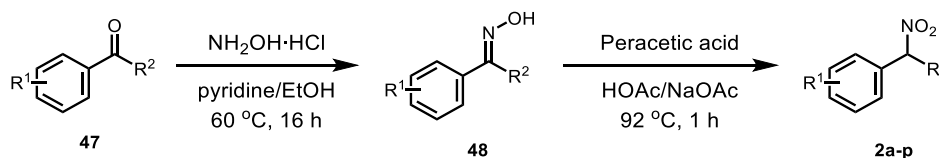

**General procedure.** Adapted from the method by S.V. Tsukanov *et al.*<sup>18</sup> To a stirred solution of ketone (47, 10 mmol, 1 equiv) in dry ethanol (10 mL) was added hydroxylamine hydrochloride (15 mmol, 1.5 equiv) and pyridine (20 mmol, 2 equiv), the reaction mixture was stirred at  $60\text{ }^\circ\text{C}$  for 16 hours. After completion of the reaction, the solvent was removed under reduced pressure. The resulting mixture was dissolved in EtOAc (50 mL), washed with aqueous 1 M HCl (50 mL), saturated aqueous  $\text{NaHCO}_3$  (50 mL), and brine (50 mL). The organic layer was collected and dried over  $\text{Na}_2\text{SO}_4$ , filtered and concentrated to give the oxime product 48, which was used in the next step without further purification.

The oxime (48, 5 mmol, 1 equiv) was dissolved in glacial acetic acid (5 mL) and the reaction mixture was heated to  $92\text{ }^\circ\text{C}$ . Sodium acetate (2 mmol, 0.4 equiv) was dissolved in a solution of peracetic acid (3.0 equiv), and the mixture was added to the oxime solution in a dropwise manner over 20 min. The temperature of the reaction was maintained carefully around  $92\text{ }^\circ\text{C}$  for 1 hour. After completion of the reaction, the reaction mixture was cooled to room temperature and diluted with water (50 mL). The resulting solution was extracted with DCM (2 x 30 mL). The combined organic layers were washed with water (50 mL), saturated aqueous  $\text{NaHCO}_3$  (50 mL), saturated aqueous  $\text{Na}_2\text{SO}_3$  (50 mL), and brine (50 mL). The resulting solution was dried over  $\text{Na}_2\text{SO}_4$ , filtered, and concentrated to provide a crude product, which was further purified by flash chromatography (EtOAc/Hexanes, 5%, *v/v*) to provide the pure nitro compounds 2a-q.

### 1-Nitroethylbenzene (2a)

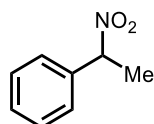

Clear oil. 340 mg, 45% yield.

$^1\text{H}$  NMR (500 MHz,  $\text{CDCl}_3$ )  $\delta$  7.50 – 7.44 (m, 2H), 7.44 – 7.37 (m, 3H), 5.62 (q,  $J = 7.0$  Hz, 1H), 1.90 (d,  $J = 7.0$  Hz, 3H).

$^{13}\text{C}$  NMR (126 MHz,  $\text{CDCl}_3$ )  $\delta$  135.7, 129.9, 129.2, 127.5, 86.3, 19.6.

The NMR spectra is in agreement with published data.<sup>18</sup>

1-Fluoro-2-(1-nitroethyl)benzene (**2b**)

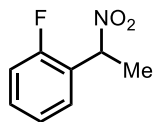

Clear oil. 296 mg, 35% yield.

$^1\text{H}$  NMR (500 MHz,  $\text{CDCl}_3$ )  $\delta$  7.48 – 7.37 (m, 2H), 7.24 – 7.18 (m, 1H), 7.15 – 7.08 (m, 1H), 5.92 (q,  $J = 7.0$  Hz, 1H), 1.92 (d,  $J = 7.0$  Hz, 3H).

$^{13}\text{C}$  NMR (126 MHz,  $\text{CDCl}_3$ )  $\delta$  160.4 (d,  $J = 249.7$  Hz), 131.6 (d,  $J = 8.6$  Hz), 128.2 (d,  $J = 2.7$  Hz), 124.9 (d,  $J = 3.7$  Hz), 123.2 (d,  $J = 13.6$  Hz), 116.1 (d,  $J = 21.7$  Hz), 79.1 (d,  $J = 3.7$  Hz), 19.0.

$^{19}\text{F}$  NMR (470 MHz,  $\text{CDCl}_3$ )  $\delta$  -117.3.

HRMS (DART-MS):  $m/z$  calcd for  $\text{C}_8\text{H}_8\text{F} [\text{M}-\text{NO}_2]^+$ : 123.0604, found 123.0606.

IR: 2995, 1731, 1616, 1492, 1458, 1386, 1356, 1236, 757, 741( $\text{cm}^{-1}$ ).

1-Fluoro-3-(1-nitroethyl)benzene (**2c**)

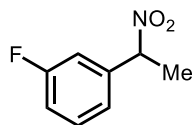

Clear oil. 304 mg, 36% yield.

$^1\text{H}$  NMR (500 MHz,  $\text{CDCl}_3$ )  $\delta$  7.45 – 7.37 (m, 1H), 7.30 – 7.18 (m, 2H), 7.17 – 7.11 (m, 1H), 5.63 (q,  $J = 7.0$  Hz, 1H), 1.92 (d,  $J = 7.0$  Hz, 3H).

$^{13}\text{C}$  NMR (126 MHz,  $\text{CDCl}_3$ )  $\delta$  163.0 (d,  $J = 247.9$  Hz), 137.7 (d,  $J = 7.5$  Hz), 130.8 (d,  $J = 8.2$  Hz), 123.4 (d,  $J = 3.1$  Hz), 117.0 (d,  $J = 21.0$  Hz), 114.7 (d,  $J = 22.7$  Hz), 85.6, 19.5.

$^{19}\text{F}$  NMR (470 MHz,  $\text{CDCl}_3$ )  $\delta$  -111.4.

The NMR spectra is in agreement with published data.<sup>19</sup>

1-Methyl-3-(1-nitroethyl)benzene (**2d**)

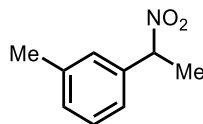

Light yellow oil. 313 mg, 38% yield.

$^1\text{H}$  NMR (500 MHz,  $\text{CDCl}_3$ )  $\delta$  7.35 – 7.23 (m, 4H), 5.62 (q,  $J = 6.9$  Hz, 1H), 2.41 (s, 3H), 1.92 (d,  $J = 7.0$  Hz, 3H).

$^{13}\text{C}$  NMR (126 MHz,  $\text{CDCl}_3$ )  $\delta$  139.0, 135.7, 130.6, 129.0, 128.1, 124.5, 86.3, 21.5, 19.6.

The NMR spectra is in agreement with published data.<sup>20</sup>

1-Methoxy-3-(1-nitroethyl)benzene (**2e**)

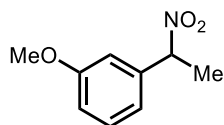

Light yellow oil. 298 mg, 33% yield.

$^1\text{H NMR}$  (500 MHz,  $\text{CDCl}_3$ )  $\delta$  7.32 (t,  $J = 8.0$  Hz, 1H), 7.03 (d,  $J = 7.7$  Hz, 1H), 7.00 – 6.97 (m, 1H), 6.96 – 6.91 (m, 1H), 5.58 (q,  $J = 6.9$  Hz, 1H), 3.82 (s, 3H), 1.88 (d,  $J = 6.9$  Hz, 3H).

$^{13}\text{C NMR}$  (126 MHz,  $\text{CDCl}_3$ )  $\delta$  160.1, 137.1, 130.2, 119.7, 115.2, 113.2, 86.2, 55.5, 19.6.

The NMR spectra is in agreement with published data.<sup>20</sup>

1-Methyl-4-(1-nitroethyl)benzene (**2f**)

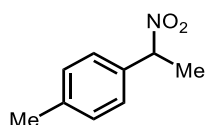

Light yellow oil. 247 mg, 30% yield.

$^1\text{H NMR}$  (500 MHz,  $\text{CDCl}_3$ )  $\delta$  7.35 (d,  $J = 8.1$  Hz, 2H), 7.21 (d,  $J = 7.8$  Hz, 2H), 5.59 (q,  $J = 7.0$  Hz, 1H), 2.37 (s, 3H), 1.88 (d,  $J = 6.9$  Hz, 3H).

$^{13}\text{C NMR}$  (126 MHz,  $\text{CDCl}_3$ )  $\delta$  140.0, 132.8, 129.8, 127.4, 86.1, 21.3, 19.5.

The NMR spectra is in agreement with published data.<sup>20</sup>

1-Methoxy-4-(1-nitroethyl)benzene (**2g**)

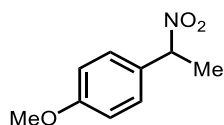

Yellow oil. 153 mg, 17% yield.

$^1\text{H NMR}$  (500 MHz,  $\text{CDCl}_3$ )  $\delta$  7.40 (d,  $J = 8.9$  Hz, 2H), 6.92 (d,  $J = 8.8$  Hz, 2H), 5.57 (q,  $J = 7.0$  Hz, 1H), 3.82 (s, 3H), 1.88 (d,  $J = 7.0$  Hz, 3H).

$^{13}\text{C NMR}$  (126 MHz,  $\text{CDCl}_3$ )  $\delta$  160.8, 129.1, 127.8, 114.4, 85.9, 55.5, 19.5.

The NMR spectra is in agreement with published data.<sup>20</sup>

1-Chloro-4-(1-nitroethyl)benzene (**2h**)

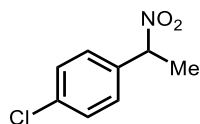

Light yellow oil. 315 mg, 38% yield.

$^1\text{H NMR}$  (500 MHz,  $\text{CDCl}_3$ )  $\delta$  7.42 – 7.37 (m, 4H), 5.59 (q,  $J = 7.0$  Hz, 1H), 1.88 (d,  $J = 7.0$  Hz, 3H).

$^{13}\text{C NMR}$  (126 MHz,  $\text{CDCl}_3$ )  $\delta$  136.0, 134.0, 129.4, 129.0, 85.5, 19.5.

The NMR spectra is in agreement with published data.<sup>20</sup>

1-Bromo-4-(1-nitroethyl)benzene (**2i**)

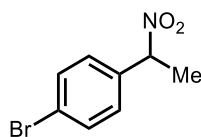

Light yellow oil. 483 mg, 42% yield.

$^1\text{H}$  NMR (500 MHz,  $\text{CDCl}_3$ )  $\delta$  7.55 (d,  $J = 8.5$  Hz, 2H), 7.34 (d,  $J = 8.5$  Hz, 2H), 5.57 (q,  $J = 7.0$  Hz, 1H), 1.88 (d,  $J = 7.0$  Hz, 3H).

$^{13}\text{C}$  NMR (126 MHz,  $\text{CDCl}_3$ )  $\delta$  134.5, 132.4, 129.2, 124.2, 85.6, 19.5.

HRMS (DART-MS):  $m/z$  calcd for  $\text{C}_8\text{H}_8\text{Br} [\text{M}-\text{NO}_2]^+$ : 182.9804, found 182.9804.

IR: 2991, 1593, 1546, 1489, 1408, 1385, 1355, 1284, 1073, 1011, 863, 747, 702 ( $\text{cm}^{-1}$ ).

1-(1-Nitroethyl)-4-(trifluoromethyl)benzene (**2j**)

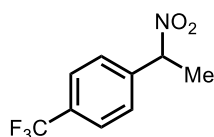

Clear oil. 330 mg, 30% yield.

$^1\text{H}$  NMR (500 MHz,  $\text{CDCl}_3$ )  $\delta$  7.68 (d,  $J = 8.1$  Hz, 2H), 7.59 (d,  $J = 8.1$  Hz, 2H), 5.67 (q,  $J = 6.9$  Hz, 1H), 1.93 (d,  $J = 7.0$  Hz, 3H).

$^{13}\text{C}$  NMR (126 MHz,  $\text{CDCl}_3$ )  $\delta$  139.2 (d,  $J = 1.5$  Hz), 132.1 (q,  $J = 32.8$  Hz), 128.0, 126.2 (q,  $J = 3.8$  Hz), 123.8 (q,  $J = 272.4$  Hz), 85.6, 19.6.

$^{19}\text{F}$  NMR (470 MHz,  $\text{CDCl}_3$ )  $\delta$  -62.9.

HRMS (DART-MS):  $m/z$  calcd for  $\text{C}_9\text{H}_9\text{NO}_2\text{F}_3 [\text{M}+\text{H}]^+$ : 220.0580, found 220.0578.

IR: 2981, 1690, 1556, 1428, 1410, 1361, 1262, 1125, 1060, 837, 718, 607 ( $\text{cm}^{-1}$ ).

2-(1-nitroethyl)naphthalene (**2k**)

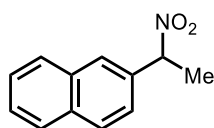

Clear oil. 281 mg, 28% yield.

$^1\text{H}$  NMR (500 MHz,  $\text{CDCl}_3$ )  $\delta$  7.95 – 7.82 (m, 4H), 7.59 – 7.50 (m, 3H), 5.79 (q,  $J = 6.9$  Hz, 1H), 2.00 (d,  $J = 6.9$  Hz, 3H).

$^{13}\text{C}$  NMR (126 MHz,  $\text{CDCl}_3$ )  $\delta$  133.8, 133.1, 133.0, 129.2, 128.4, 127.9, 127.5, 127.2, 126.9, 124.3, 86.5, 19.7.

The NMR spectra is in agreement with published data.<sup>20</sup>

1-Nitropropylbenzene (**2m**)

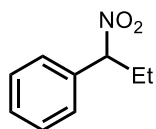

Clear oil. 255 mg, 31% yield.

$^1\text{H}$  NMR (500 MHz,  $\text{CDCl}_3$ )  $\delta$  7.50 – 7.45 (m, 2H), 7.43 – 7.37 (m, 3H), 5.37 (dd,  $J$  = 8.8, 6.4 Hz, 1H), 2.58 – 2.46 (m, 1H), 2.19 – 2.05 (m, 1H), 0.99 (t,  $J$  = 7.4 Hz, 3H).

$^{13}\text{C}$  NMR (126 MHz,  $\text{CDCl}_3$ )  $\delta$  134.6, 129.9, 129.1, 127.9, 93.2, 27.5, 10.8.

The NMR spectra is in agreement with published data.<sup>21</sup>

1-Nitrobutylbenzene (**2n**)

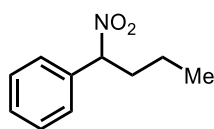

Clear oil. 134 mg, 15% yield.

$^1\text{H}$  NMR (500 MHz,  $\text{CDCl}_3$ )  $\delta$  7.49 – 7.44 (m, 2H), 7.42 – 7.38 (m, 3H), 5.46 (dd,  $J$  = 8.8, 6.4 Hz, 1H), 2.54 – 2.42 (m, 1H), 2.11 – 1.99 (m, 1H), 1.43 – 1.30 (m, 2H), 0.98 (t,  $J$  = 7.4 Hz, 3H).

$^{13}\text{C}$  NMR (126 MHz,  $\text{CDCl}_3$ )  $\delta$  134.8, 129.9, 129.1, 127.9, 91.5, 36.0, 19.5, 13.6.

HRMS (DART-MS):  $m/z$  calcd for  $\text{C}_{10}\text{H}_{14}\text{NO}_2$   $[\text{M}+\text{H}]^+$ : 180.1019, found 180.1019.

IR: 2970, 1552, 1491, 1457, 1363, 1073, 951, 750, 695 ( $\text{cm}^{-1}$ ).

(2,2,2-Trifluoro-1-nitroethyl)benzene (**2o**)

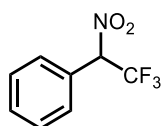

White solid. 380 mg, 37% yield.

$^1\text{H}$  NMR (500 MHz,  $\text{CDCl}_3$ )  $\delta$  8.86 (s, 1H), 7.57 – 7.46 (m, 5H).

$^{13}\text{C}$  NMR (126 MHz,  $\text{CDCl}_3$ )  $\delta$  148.0 (q,  $J$  = 32.5 Hz), 130.8, 128.8, 128.7, 126.0, 120.7 (q,  $J$  = 274.8 Hz).

$^{19}\text{F}$  NMR (376 MHz,  $\text{CDCl}_3$ )  $\delta$  -66.8.

The NMR spectra is in agreement with published data.<sup>18</sup>

3-(1-Nitroethyl)thiophene (**2p**)

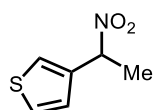

Clear oil. 87 mg, 11% yield.

$^1\text{H}$  NMR (500 MHz,  $\text{CDCl}_3$ )  $\delta$  7.47 – 7.42 (m, 1H), 7.36 (dd,  $J = 5.1, 3.0$  Hz, 1H), 7.20 (dd,  $J = 5.0, 1.4$  Hz, 1H), 5.72 (q,  $J = 7.0$  Hz, 1H), 1.91 (d,  $J = 6.9$  Hz, 3H).

$^{13}\text{C}$  NMR (126 MHz,  $\text{CDCl}_3$ )  $\delta$  136.4, 127.1, 126.3, 125.1, 81.6, 19.6.

HRMS (DART-MS):  $m/z$  calcd for  $\text{C}_6\text{H}_8\text{NO}_2\text{S}$   $[\text{M}+\text{H}]^+$ : 158.0270, found 158.0271.

IR: 3108, 2991, 1546, 1546, 1416, 1408, 1383, 1312, 1164, 1084, 916, 829, 756, 670 ( $\text{cm}^{-1}$ ).

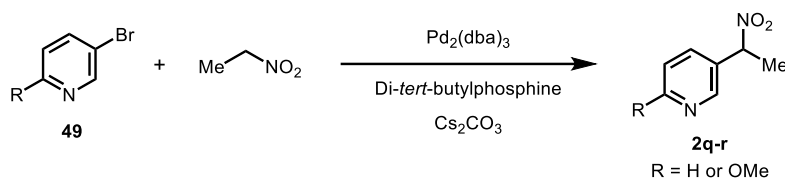

**General procedure.** Adapted from the method by E. M. Vogl *et al.*<sup>22</sup> In a flame-dried round bottle flask equipped with a stir bar under nitrogen was charged with the aryl bromide **49** (3 mmol, 1 equiv), nitroethane (6 mmol, 450 mg, 2 equiv),  $\text{Pd}_2(\text{dba})_3$  (0.09 mmol, 82 mg, 3 mol%), di-tert-butylphosphine ligand (0.18 mmol, 26 mg, 6 mol%),  $\text{Cs}_2\text{CO}_3$  (3.6 mmol, 1.17 g, 1.2 equiv) in dry dioxane. The reaction mixture was purged with  $\text{N}_2$  for 15 min and heated at 60 °C for 24 hours. After completion of the reaction, the reaction mixture was filtered through Celite and washed with DCM (15 mL). The filtrate was concentrated under vacuum to provide the crude product, which was purified by flash chromatography. For compound **2q**, additional reverse phase C18 flash chromatography was needed.

### 3-(1-Nitroethyl)pyridine (**2q**)

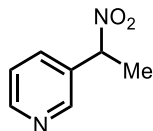

Clear oil. 80 mg, 17% yield.

$^1\text{H}$  NMR (500 MHz,  $\text{CDCl}_3$ )  $\delta$  8.71 (s, 1H), 8.67 (d,  $J = 4.8$  Hz, 1H), 7.84 (dd,  $J = 7.7, 2.1$  Hz, 1H), 7.38 (dd,  $J = 8.1, 4.9$  Hz, 1H), 5.65 (q,  $J = 7.0$  Hz, 1H), 1.94 (d,  $J = 7.0$  Hz, 3H).

$^{13}\text{C}$  NMR (126 MHz,  $\text{CDCl}_3$ )  $\delta$  151.1, 149.1, 135.1, 131.4, 124.1, 83.9, 19.5.

HRMS (DART-MS):  $m/z$  calcd for  $\text{C}_7\text{H}_9\text{N}_2\text{O}_2$   $[\text{M}+\text{H}]^+$ : 153.0658, found 153.0659.

IR: 2993, 1688, 1547, 1428, 1360, 1273, 1091, 1064, 863 ( $\text{cm}^{-1}$ ).

### 2-Methoxy-5-(1-nitroethyl)pyridine (**2r**)

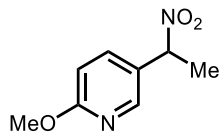

Clear oil. 218 mg, 40% yield.

$^1\text{H}$  NMR (500 MHz,  $\text{CDCl}_3$ )  $\delta$  8.22 (d,  $J = 2.5$  Hz, 1H), 7.70 (dd,  $J = 8.7, 2.6$  Hz, 1H), 6.77 (d,  $J = 8.7$

Hz, 1H), 5.56 (q,  $J = 7.0$  Hz, 1H), 3.93 (s, 3H), 1.87 (d,  $J = 7.0$  Hz, 3H).

$^{13}\text{C}$  NMR (126 MHz,  $\text{CDCl}_3$ )  $\delta$  165.2, 146.8, 137.4, 124.3, 111.6, 83.6, 53.8, 19.3.

HRMS (DART-MS):  $m/z$  calcd for  $\text{C}_8\text{H}_{11}\text{N}_2\text{O}_3$   $[\text{M}+\text{H}]^+$ : 183.0764, found 183.0767.

IR: 2980, 1610, 1554, 1385, 1135, 904, 724, 649 ( $\text{cm}^{-1}$ ).

### Synthesis of nitrone **38**

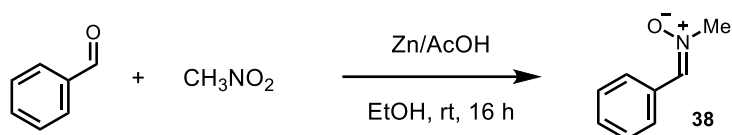

To a solution of benzyl aldehyde (1.06 g, 10 mmol, 1.0 equiv),  $\text{CH}_3\text{NO}_2$  (2.44 g, 40 mmol, 4.0 equiv) and zinc powder (3.93 g, 60 mmol 6 equiv) in 95% ethanol (20 mL) was added glacial acetic acid (4 mL, 70 mmol, 7 equiv) dropwise at 0 °C. The reaction mixture was allowed to stir at room temperature for 16 h. The suspension was filtered, and the filtrate was collected and concentrated under vacuum, the crude mixture was purified by flash column chromatography using EtOAc as eluent to give the nitrone product.

### C-Phenyl-N-methyl-nitron (**38**)

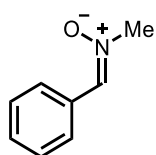

White solid. 590 mg, 44% yield.

$^1\text{H}$  NMR (500 MHz,  $\text{CDCl}_3$ )  $\delta$  8.24 – 8.18 (m, 2H), 7.46 – 7.39 (m, 3H), 7.37 (s, 1H), 3.88 (s, 3H).

$^{13}\text{C}$  NMR (126 MHz,  $\text{CDCl}_3$ )  $\delta$  135.3, 130.6, 128.6, 128.5, 54.6.

The NMR spectra is in agreement with published data.<sup>23</sup>

### Synthesis of reference compounds

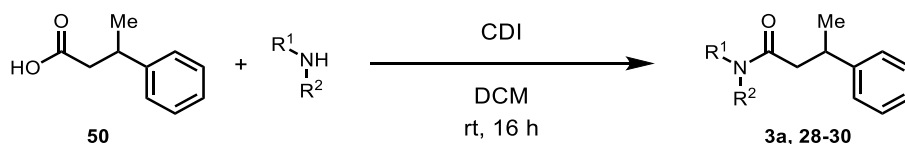

**General procedure.** To a stirred solution of acid **50** (328 mg, 2 mmol, 1 equiv) in dry DCM (10 mL) was added carbonyldiimidazole (CDI, 356 mg, 2.2 mmol, 1.2 equiv) under  $\text{N}_2$  atmosphere and the reaction mixture was stirred at room temperature for 1 hour. Amine (2.6 mmol, 1.3 equiv) was added to the reaction mixture, and the mixture was further stirred at room temperature for 16 h. After completion of the reaction, the reaction mixture was diluted with DCM (10 mL), washed with aqueous 1 M HCl (10 mL), saturated aqueous  $\text{NaHCO}_3$  (20 mL) and brine (20 mL). The organic layer was collected and dried

over Na<sub>2</sub>SO<sub>4</sub>, filtered and concentrated to give crude amide product, which was purified by flash chromatography (EtOAc/Hexanes, 30–50%, v/v).

*N,N*-Dimethyl-3-phenylbutanamide (**3a**)

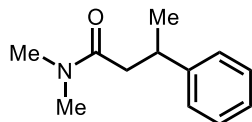

Clear oil. 263 mg, 69% yield.

<sup>1</sup>H NMR (500 MHz, CDCl<sub>3</sub>) δ 7.35 – 7.19 (m, 5H), 3.38 (h, *J* = 7.0 Hz, 1H), 2.92 (s, 3H), 2.89 (s, 3H), 2.63 (dd, *J* = 15.0, 6.2 Hz, 1H), 2.53 (dd, *J* = 15.0, 8.1 Hz, 1H), 1.35 (d, *J* = 6.9 Hz, 3H).

<sup>13</sup>C NMR (126 MHz, CDCl<sub>3</sub>) δ 171.9, 146.7, 128.5, 127.0, 126.3, 42.0, 37.4, 36.6, 35.5, 21.7.

The NMR spectra is in agreement with published data <sup>24</sup>.

HRMS (DART-MS): *m/z* calcd for C<sub>12</sub>H<sub>18</sub>NO [M+H]<sup>+</sup>: 192.1383, found 192.1379.

IR: 3026, 2929, 1638, 1493, 1395, 1264, 1143, 1016, 763, 700 (cm<sup>-1</sup>).

*N*-Benzyl-*N*-methyl-3-phenylbutanamide (**28**)

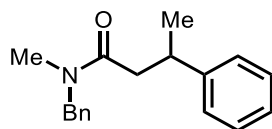

Clear oil. 402 mg, 75% yield.

<sup>1</sup>H NMR (500 MHz, CDCl<sub>3</sub>) δ 7.37 – 7.21 (m, 8H), 7.10 (dd, *J* = 19.3, 7.1 Hz, 2H), 4.66 (d, *J* = 14.7 Hz, 0.6H), 4.50 (d, *J* = 14.7 Hz, 0.6H), 4.46 (d, *J* = 17.2 Hz, 0.4H), 4.41 (d, *J* = 16.8 Hz, 0.4H), 3.52 – 3.42 (m, 1H), 2.92 (s, 1.2H), 2.83 (s, 1.8H), 2.77 – 2.67 (m, 1H), 2.64 – 2.56 (m, 1H), 1.40 (d, *J* = 6.9 Hz, 1.8H), 1.34 (d, *J* = 6.9 Hz, 1.2H). Two rotamers, major rotamer : minor rotamer = 1.5:1.

<sup>13</sup>C NMR (126 MHz, CDCl<sub>3</sub>) δ 172.1, 171.8, 146.5, 146.4, 137.4, 136.6, 128.9, 128.5, 127.9, 127.6, 127.2, 127.0, 126.9, 126.3, 53.2, 50.8, 41.8, 41.6, 36.7, 36.5, 35.0, 33.9, 21.8, 21.6. Observed complexity is due to rotamers.

HRMS (DART-MS): *m/z* calcd for C<sub>18</sub>H<sub>22</sub>NO [M+H]<sup>+</sup>: 268.1596, found 268.1693.

IR: 3027, 2961, 1638, 1493, 1451, 1356, 1181, 1121, 1016, 733, 698 (cm<sup>-1</sup>).

*N*-Methoxy-*N*-methyl-3-phenylbutanamide (**29**)

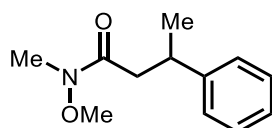

Clear oil. 190 mg, 46% yield.

<sup>1</sup>H NMR (500 MHz, CDCl<sub>3</sub>) δ 7.32 – 7.24 (m, 4H), 7.22 – 7.17 (m, 1H), 3.58 (s, 3H), 3.42 – 3.33 (m, 1H), 3.14 (s, 3H), 2.74 (dd, *J* = 10.2 Hz, 1H), 2.65 (dd, *J* = 15.1, 8.3 Hz, 1H), 1.32 (d, *J* = 7.0 Hz, 3H).



$^{13}\text{C}$  NMR (126 MHz,  $\text{CDCl}_3$ )  $\delta$  173.3, 146.7, 128.6, 127.0, 126.4, 61.3, 40.5, 35.9, 32.2, 21.8.

HRMS (DART-MS):  $m/z$  calcd for  $\text{C}_{12}\text{H}_{18}\text{NO}_2$   $[\text{M}+\text{H}]^+$ : 208.1332, found 208.1330.

IR: 3027, 2958, 1603, 1451, 1389, 1196, 909, 761, 699 ( $\text{cm}^{-1}$ ).

### 3-Phenyl-1-(pyrrolidin-1-yl)butan-1-one (**30**)

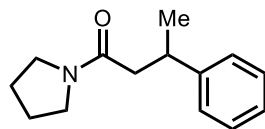

Clear oil. 262 mg, 60% yield.

$^1\text{H}$  NMR (500 MHz,  $\text{CDCl}_3$ )  $\delta$  7.32 – 7.26 (m, 4H), 7.23 – 7.18 (m, 1H), 3.50 – 3.37 (m, 3H), 3.36 – 3.30 (m, 1H), 3.19 – 3.09 (m, 1H), 2.55 (dd,  $J = 14.7, 6.5$  Hz, 1H), 2.49 (dd,  $J = 14.7, 7.9$  Hz, 1H), 1.90 – 1.74 (m, 4H), 1.36 (d,  $J = 6.9$  Hz, 3H).

$^{13}\text{C}$  NMR (126 MHz,  $\text{CDCl}_3$ )  $\delta$  170.4, 146.7, 128.5, 127.0, 126.3, 46.8, 45.7, 43.8, 36.5, 26.2, 24.5, 21.5.

HRMS (DART-MS):  $m/z$  calcd for  $\text{C}_{14}\text{H}_{20}\text{NO}$   $[\text{M}+\text{H}]^+$ : 218.1339, found 218.1334.

IR: 3026, 2964, 2871, 1631, 1425, 1339, 1252, 1087, 761, 700 ( $\text{cm}^{-1}$ ).

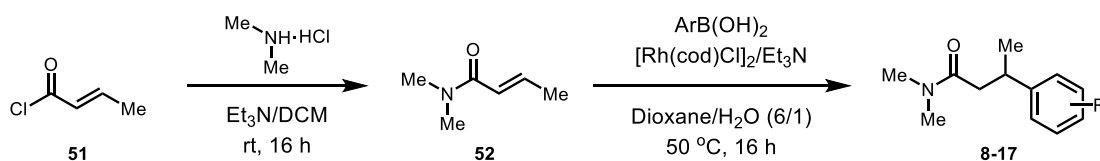

### General procedure.

(*E*)-*N,N*-dimethylbut-2-enamide **52** was prepared according to published procedure.<sup>25</sup> Adapted from the method by R. Itooka *et al.*<sup>26</sup> To a stirred solution of  $\text{ArB}(\text{OH})_2$  (2.25 mmol, 1.5 equiv) and  $[\text{Rh}(\text{cod})\text{Cl}]_2$  (1 mol%) in degassed dioxane/ $\text{H}_2\text{O}$  (6/1, v/v, 3 mL) was added the  $\alpha,\beta$ -unsaturated amide (**52**, 1.5 mmol, 1.0 equiv) and triethylamine (1.5 mmol, 1.0 equiv) under  $\text{N}_2$  atmosphere. The reaction mixture was heated at 50 °C for 16 hours. After completion of the reaction, the mixture was concentrated *in vacuo*, the resulting mixture was dissolved in DCM (20 mL), washed with aqueous 1 M HCl (10 mL), saturated aqueous  $\text{NaHCO}_3$  (20 mL) and brine (20 mL). The organic layer was collected and dried over  $\text{Na}_2\text{SO}_4$ , filtered and concentrated to give the crude product, which was purified by flash chromatography (EtOAc/Hexanes, 30–50%, v/v).

### 3-(2-Fluorophenyl)-*N,N*-dimethylbutanamide (**8**)

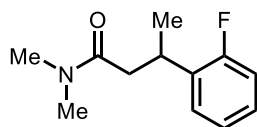

Clear oil. 49 mg, 16% yield.

$^1\text{H NMR}$  (500 MHz,  $\text{CDCl}_3$ )  $\delta$  7.27 – 7.23 (m, 2H), 7.20 – 7.14 (m, 1H), 7.10 – 7.05 (m, 1H), 7.03 – 6.97 (m, 1H), 3.59 (h,  $J = 13.9, 7.0$  Hz, 1H), 2.96 (s, 3H), 2.92 (s, 3H), 2.70 (dd,  $J = 15.2, 5.8$  Hz, 1H), 2.56 (dd,  $J = 15.2, 8.5$  Hz, 1H), 1.35 (d,  $J = 7.0$  Hz, 3H).

$^{13}\text{C NMR}$  (126 MHz,  $\text{CDCl}_3$ )  $\delta$  171.6, 161.0 (d,  $J = 245.2$  Hz), 133.2 (d,  $J = 14.0$  Hz), 128.8 (d,  $J = 5.4$  Hz), 127.8 (d,  $J = 8.4$  Hz), 124.3 (d,  $J = 3.4$  Hz), 115.7 (d,  $J = 22.8$  Hz), 40.2, 37.4, 35.6, 31.10, 20.4.

$^{19}\text{F NMR}$  (470 MHz,  $\text{CDCl}_3$ )  $\delta$  -117.8.

HRMS (DART-MS):  $m/z$  calcd for  $\text{C}_{13}\text{H}_{17}\text{NOF}$   $[\text{M}+\text{H}]^+$ : 210.1289, found 210.1284.

IR: 2970, 2883, 2871, 1636, 1466, 1340, 1159, 950, 816 ( $\text{cm}^{-1}$ ).

### 3-(3-Fluorophenyl)-*N,N*-dimethylbutanamide (**9**)

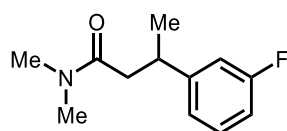

Clear oil. 120 mg, 38% yield.

$^1\text{H NMR}$  (500 MHz,  $\text{CDCl}_3$ )  $\delta$  7.26 – 7.21 (m, 1H), 7.02 (dd,  $J = 7.5, 1.5$  Hz, 1H), 6.97 – 6.84 (m, 2H), 3.38 (h,  $J = 7.0$  Hz, 1H), 2.90 (s, 6H), 2.60 (dd,  $J = 15.2, 6.3$  Hz, 1H), 2.50 (dd,  $J = 15.2, 7.8$  Hz, 1H), 1.31 (d,  $J = 6.9$  Hz, 3H).

$^{13}\text{C NMR}$  (126 MHz,  $\text{CDCl}_3$ )  $\delta$  171.5, 163.1 (d,  $J = 245.3$  Hz), 149.5 (d,  $J = 6.7$  Hz), 130.0 (d,  $J = 8.3$  Hz), 122.8 (d,  $J = 2.7$  Hz), 113.8 (d,  $J = 21.0$  Hz), 113.2 (d,  $J = 21.0$  Hz), 41.6, 37.4, 36.3, 35.6, 21.7.

$^{19}\text{F NMR}$  (470 MHz,  $\text{CDCl}_3$ )  $\delta$  -113.4.

HRMS (DART-MS):  $m/z$  calcd for  $\text{C}_{13}\text{H}_{17}\text{NOF}$   $[\text{M}+\text{H}]^+$ : 210.1289, found 210.1286.

IR: 2931, 1638, 1587, 1486, 1397, 1139, 869, 783, 698 ( $\text{cm}^{-1}$ ).

### *N,N*-Dimethyl-3-(*m*-tolyl)butanamide (**10**)

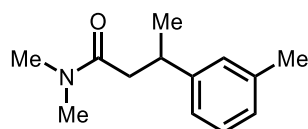

Light yellow oil. 141 mg, 45% yield.

$^1\text{H NMR}$  (500 MHz,  $\text{CDCl}_3$ )  $\delta$  7.18 (t,  $J = 7.5$  Hz, 1H), 7.08 – 6.99 (m, 3H), 3.32 (h,  $J = 6.9$  Hz, 1H), 2.91 (s, 3H), 2.88 (s, 3H), 2.60 (dd,  $J = 14.9, 6.0$  Hz, 1H), 2.50 (dd,  $J = 15.0, 8.3$  Hz, 1H), 2.33 (s, 3H), 1.32 (d,  $J = 7.0$  Hz, 3H).

$^{13}\text{C NMR}$  (126 MHz,  $\text{CDCl}_3$ )  $\delta$  172.0, 146.7, 138.1, 128.5, 127.8, 127.1, 123.9, 42.0, 37.4, 36.6, 35.6, 21.7, 21.6.

HRMS (DART-MS):  $m/z$  calcd for  $\text{C}_{13}\text{H}_{20}\text{NO}$   $[\text{M}+\text{H}]^+$ : 206.1539, found 206.1538.

IR: 2925, 1638, 1489, 1395, 1261, 1142, 783, 704 ( $\text{cm}^{-1}$ ).

3-(3-Methoxyphenyl)-*N,N*-dimethylbutanamide (**11**)

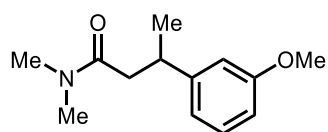

Light yellow oil. 105 mg, 31% yield.

$^1\text{H}$  NMR (500 MHz,  $\text{CDCl}_3$ )  $\delta$  7.21 (t,  $J = 7.9$  Hz, 1H), 6.84 (d,  $J = 7.6$  Hz, 1H), 6.81 – 6.77 (m, 1H), 6.76 – 6.72 (m, 1H), 3.79 (s, 3H), 3.34 (h,  $J = 6.9$  Hz, 1H), 2.91 (s, 3H), 2.89 (s, 3H), 2.60 (dd,  $J = 15.0$ , 6.0 Hz, 1H), 2.50 (dd,  $J = 15.0$ , 8.3 Hz, 1H), 1.32 (d,  $J = 6.9$  Hz, 3H).

$^{13}\text{C}$  NMR (126 MHz,  $\text{CDCl}_3$ )  $\delta$  171.9, 159.8, 148.6, 129.5, 119.4, 113.0, 111.4, 55.3, 41.9, 37.4, 36.7, 35.6, 21.7.

HRMS (DART-MS):  $m/z$  calcd for  $\text{C}_{13}\text{H}_{20}\text{NO}_2$   $[\text{M}+\text{H}]^+$ : 222.1489, found 222.1486.

IR: 2932, 2835, 1637, 1583, 1486, 1396, 1260, 1144, 780, 700 ( $\text{cm}^{-1}$ ).

*N,N*-Dimethyl-3-(*p*-tolyl)butanamide (**12**)

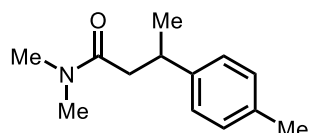

Clear oil. 95 mg, 31% yield.

$^1\text{H}$  NMR (500 MHz,  $\text{CDCl}_3$ )  $\delta$  7.17 – 7.12 (m, 2H), 7.12 – 7.08 (m, 2H), 3.32 (h,  $J = 6.9$  Hz, 1H), 2.90 (s, 3H), 2.88 (s, 3H), 2.59 (dd,  $J = 15.0$ , 6.1 Hz, 1H), 2.50 (dd,  $J = 15.0$ , 8.2 Hz, 1H), 2.31 (s, 3H), 1.31 (d,  $J = 6.9$  Hz, 3H).

$^{13}\text{C}$  NMR (126 MHz,  $\text{CDCl}_3$ )  $\delta$  172.0, 143.8, 135.8, 129.2, 126.8, 42.1, 37.4, 36.2, 35.5, 21.8, 21.1.

HRMS (DART-MS):  $m/z$  calcd for  $\text{C}_{13}\text{H}_{20}\text{NO}$   $[\text{M}+\text{H}]^+$ : 206.1539, found 206.1536.

IR: 2925, 1638, 1514, 1455, 1395, 1264, 1143, 1017, 816, 721 ( $\text{cm}^{-1}$ ).

3-(4-Methoxyphenyl)-*N,N*-dimethylbutanamide (**13**)

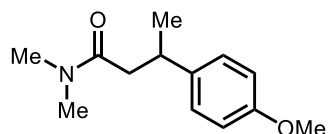

Light yellow oil. 135 mg, 41% yield.

$^1\text{H}$  NMR (500 MHz,  $\text{CDCl}_3$ )  $\delta$  7.16 (d,  $J = 8.7$  Hz, 2H), 6.83 (d,  $J = 8.7$  Hz, 2H), 3.78 (s, 3H), 3.32 (h,  $J = 7.0$  Hz, 1H), 2.89 (s, 3H), 2.87 (s, 3H), 2.58 (dd,  $J = 14.9$ , 6.5 Hz, 1H), 2.49 (dd,  $J = 14.9$ , 7.9 Hz, 1H), 1.30 (d,  $J = 7.0$  Hz, 3H).

$^{13}\text{C}$  NMR (126 MHz,  $\text{CDCl}_3$ )  $\delta$  172.0, 158.1, 138.8, 127.9, 113.9, 55.4, 42.2, 37.5, 35.9, 35.5, 21.9.

HRMS (DART-MS):  $m/z$  calcd for  $\text{C}_{13}\text{H}_{20}\text{NO}_2$   $[\text{M}+\text{H}]^+$ : 222.1489, found 222.1488.

IR: 2957, 1636, 1511, 1369, 1244, 1264, 1178, 1035, 830, 703 ( $\text{cm}^{-1}$ ).

3-(4-Chlorophenyl)-*N,N*-dimethylbutanamide (**14**)

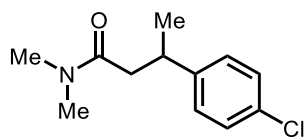

White solid. 140 mg, 41% yield.

$^1\text{H}$  NMR (500 MHz,  $\text{CDCl}_3$ )  $\delta$  7.28 (d,  $J = 8.3$  Hz, 2H), 7.20 (d,  $J = 8.3$  Hz, 2H), 3.38 (h,  $J = 7.0$  Hz, 1H), 2.92 (s, 6H), 2.60 (dd,  $J = 15.2, 6.7$  Hz, 1H), 2.52 (dd,  $J = 15.2, 7.5$  Hz, 1H), 1.32 (d,  $J = 6.9$  Hz, 3H).

$^{13}\text{C}$  NMR (126 MHz,  $\text{CDCl}_3$ )  $\delta$  171.5, 145.2, 131.9, 128.6, 128.4, 41.8, 37.4, 36.0, 35.6, 21.8.

HRMS (DART-MS):  $m/z$  calcd for  $\text{C}_{12}\text{H}_{17}\text{NOCl}$   $[\text{M}+\text{H}]^+$ : 226.0993, found 226.0991.

IR: 2960, 1638, 1492, 1396, 1263, 1144, 1092, 1012, 825, 719 ( $\text{cm}^{-1}$ ).

3-(4-Bromophenyl)-*N,N*-dimethylbutanamide (**15**)

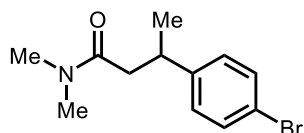

Light yellow solid. 121 mg, 30% yield.

$^1\text{H}$  NMR (500 MHz,  $\text{CDCl}_3$ )  $\delta$  7.40 (d,  $J = 8.5$  Hz, 2H), 7.12 (d,  $J = 8.2$  Hz, 2H), 3.35 (h,  $J = 7.0$  Hz, 1H), 2.89 (s, 6H), 2.57 (dd,  $J = 15.2, 6.6$  Hz, 1H), 2.49 (dd,  $J = 15.2, 7.5$  Hz, 1H), 1.30 (d,  $J = 7.0$  Hz, 3H).

$^{13}\text{C}$  NMR (126 MHz,  $\text{CDCl}_3$ )  $\delta$  171.5, 145.8, 131.6, 128.8, 120.0, 41.7, 37.4, 36.0, 35.6, 21.8.

HRMS (DART-MS):  $m/z$  calcd for  $\text{C}_{12}\text{H}_{17}\text{NOBr}$   $[\text{M}+\text{H}]^+$ : 270.0488, found 270.0484.

IR: 2960, 2929, 1637, 1488, 1396, 1263, 1106, 1008, 821, 716 ( $\text{cm}^{-1}$ ).

*N,N*-Dimethyl-3-[4-(trifluoromethyl)phenyl]butanamide (**16**)

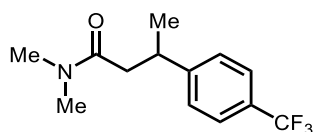

White solid. 140 mg, 36% yield.

$^1\text{H}$  NMR (500 MHz,  $\text{CDCl}_3$ )  $\delta$  7.54 (d,  $J = 8.0$  Hz, 2H), 7.36 (d,  $J = 8.0$  Hz, 2H), 3.45 (h,  $J = 7.0$  Hz, 1H), 2.91 (s, 6H), 2.62 (dd,  $J = 15.4, 6.7$  Hz, 1H), 2.54 (dd,  $J = 15.4, 7.5$  Hz, 1H), 1.33 (d,  $J = 7.0$  Hz, 3H).

$^{13}\text{C}$  NMR (126 MHz,  $\text{CDCl}_3$ )  $\delta$  171.3, 150.9 (d,  $J = 1.5$  Hz), 128.6 (q,  $J = 32.3$  Hz), 127.4, 125.5 (q,  $J = 3.8$  Hz), 124.4 (q,  $J = 273.4$  Hz), 41.5, 37.4, 36.4, 35.6, 21.8.

$^{19}\text{F}$  NMR (470 MHz,  $\text{CDCl}_3$ )  $\delta$  -62.4.

HRMS (DART-MS):  $m/z$  calcd for  $\text{C}_{13}\text{H}_{17}\text{NOF}_3$   $[\text{M}+\text{H}]^+$ : 260.1257, found 260.1254.

IR: 2933, 1641, 1496, 1398, 1323, 1266, 1160, 1111, 1066, 840, 733 ( $\text{cm}^{-1}$ ).

*N,N*-Dimethyl-3-(naphthalen-2-yl)butanamide (**17**)

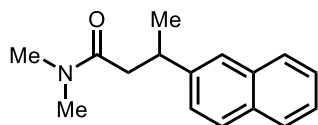

White solid. 146 mg, 40% yield.

<sup>1</sup>H NMR (500 MHz, CDCl<sub>3</sub>) δ 7.82 – 7.77 (m, 3H), 7.68 (d, *J* = 1.7 Hz, 1H), 7.48 – 7.39 (m, 3H), 3.55 (h, *J* = 6.9 Hz, 1H), 2.90 (s, 3H), 2.88 (s, 3H), 2.72 (dd, *J* = 15.0, 6.2 Hz, 1H), 2.60 (dd, *J* = 15.0, 7.9 Hz, 1H), 1.43 (d, *J* = 6.9 Hz, 3H).

<sup>13</sup>C NMR (126 MHz, CDCl<sub>3</sub>) δ 171.8, 144.2, 133.7, 132.4, 128.1, 127.8, 127.7, 126.0, 125.9, 125.4, 125.0, 41.9, 37.5, 36.7, 35.6, 21.8.

HRMS (DART-MS): *m/z* calcd for C<sub>16</sub>H<sub>20</sub>NO [M+H]<sup>+</sup>: 242.1539, found 242.1537.

IR: 2926, 1632, 1491, 1370, 1269, 1143, 1010, 826, 751 (cm<sup>-1</sup>).

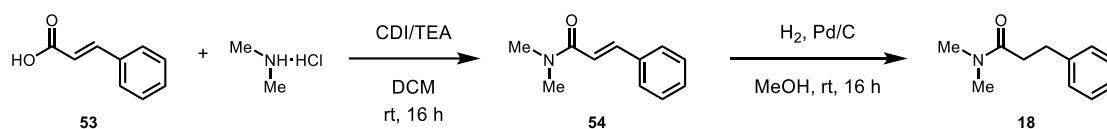

To a stirred solution of cinnamic acid **53** (740 mg, 5 mmol, 1 equiv) in dry DCM (10 mL) was added carbonyldiimidazole (CDI, 972 mg, 6 mmol, 1.2 equiv) under N<sub>2</sub> atmosphere and the reaction mixture was stirred at room temperature for 1 hour. Dimethylamine hydrochloride (530 mg, 6.5 mmol, 1.3 equiv) and triethylamine (760 mg, 1.5 equiv) were added to the reaction mixture, and the mixture was further stirred at room temperature for 16 hours. After completion of the reaction, the reaction mixture was diluted with DCM (20 mL), washed with aqueous 1 M HCl (20 mL), saturated aqueous NaHCO<sub>3</sub> (30 mL) and brine (30 mL). The organic layer was collected and dried over Na<sub>2</sub>SO<sub>4</sub>, filtered and concentrated to give crude product **54**, which was purified by flash chromatography (EtOAc/Hexanes, 40%, *v/v*).

The *N,N*-dimethylcinnamamide **54** (350 mg, 2 mmol) was dissolved in MeOH (10 mL), followed by the addition of Pd/C (10 wt%, 20 mg), and the reaction was stirred under H<sub>2</sub> atmosphere (balloon) for 16 h at room temperature. After completion of the reaction, the reaction mixture was filtered through Celite and washed with MeOH (5 mL). The filtrate was concentrated under vacuum to provide the product **18**.

*N,N*-Dimethylcinnamamide (**54**)

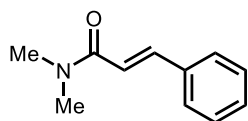

White solid. 620 mg, 71% yield.

<sup>1</sup>H NMR (500 MHz, CDCl<sub>3</sub>) δ 7.69 (d, *J* = 15.4 Hz, 1H), 7.57 – 7.52 (m, 2H), 7.42 – 7.34 (m, 3H), 6.91 (d, *J* = 15.4 Hz, 1H), 3.19 (s, 3H), 3.10 (s, 3H).

$^{13}\text{C}$  NMR (126 MHz,  $\text{CDCl}_3$ )  $\delta$  166.8, 142.4, 135.5, 129.6, 128.9, 127.9, 117.6, 37.5, 36.0.

The NMR spectra is in agreement with published data.<sup>27</sup>

#### *N,N*-Dimethyl-3-phenylpropanamide (**18**)

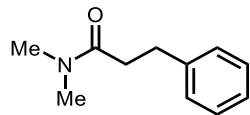

Clear oil. 310 mg, 87% yield.

$^1\text{H}$  NMR (500 MHz,  $\text{CDCl}_3$ )  $\delta$  7.32 – 7.27 (m, 2H), 7.24 – 7.18 (m, 3H), 2.97 (t,  $J = 7.7$  Hz, 2H), 2.95 (s, 3H), 2.93 (s, 3H), 2.62 (t,  $J = 7.7$  Hz, 2H).

$^{13}\text{C}$  NMR (126 MHz,  $\text{CDCl}_3$ )  $\delta$  172.3, 141.6, 128.6, 128.6, 126.2, 37.3, 35.6, 35.4, 31.5.

The NMR spectra is in agreement with published data.<sup>28</sup>

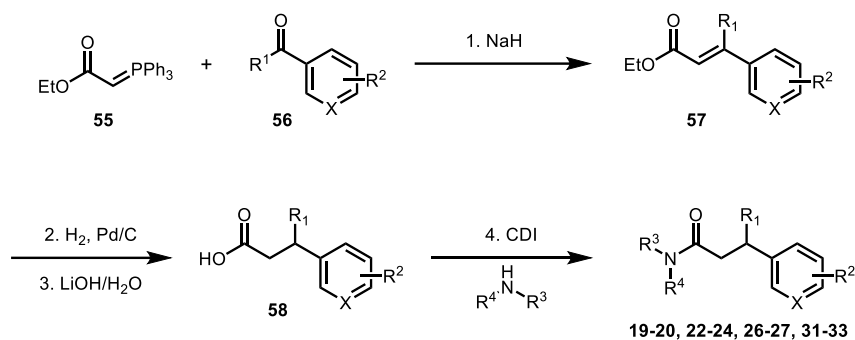

**General procedure.** In a round bottle flask equipped with a stir bar under nitrogen was charged with the 60% NaH in mineral oil (7.5 mmol, 300 mg, 1.5 equiv) and ethyl (triphenylphosphoranylidene)acetate **55** (7.5 mmol, 2.61 g, 1.5 equiv) in dry THF (25 mL) and cooled to 0 °C. Acetophenone derivatives **56** (5 mmol, 1 equiv) are dissolved in dry THF (5 mL) and added dropwise to the reaction and stirred the resulting mixture overnight at room temperature. Upon completion, the reaction mixture was filtered, and the filtrate was concentrated under vacuum. The residue was purified by silica gel column chromatography to afford the ester products **57** (82~95% yield).

The ester **57** was dissolved in MeOH (10 mL), followed by the addition of Pd/C (10 wt%, 30 mg), and the reaction was stirred under  $\text{H}_2$  atmosphere (balloon) for 16 hours at room temperature. After completion of the reaction, the reaction mixture was filtered through Celite and washed with MeOH (5 mL). The filtrate was concentrated under vacuum to provide the crude product, which was purified by flash chromatography (EtOAc/Hexanes, 50%, v/v).

In a round bottle flask equipped with a stir bar was charged with the hydrogenation products from the previous step. Aqueous LiOH (1 M, 50 mL) and THF (10% v/v) were added via syringe. The reaction mixture was allowed to stir at room temperature overnight. Upon completion as determined by TLC

analysis, concentrated HCl was added (until pH = 1) under ice-bath. The aqueous layer was extracted with DCM (35 mL x 3). The combined organic layers were dried over Na<sub>2</sub>SO<sub>4</sub>, filtered and concentrated to give crude product. The residue was purified by silica gel column chromatography to afford the free acid product **58** (90~95% yield).

To a stirred solution of acid **58** (5 mmol, 1 equiv) in dry DCM (30 mL) was added carbonyldiimidazole (CDI, 892 mg, 5.5 mmol, 1.1 equiv) under N<sub>2</sub> atmosphere and the reaction mixture was stirred at room temperature for 1 hour. Amine (6.5 mmol, 1.3 equiv) was added to the reaction mixture, and the mixture was further stirred at room temperature for 16 hours. After completion of the reaction, the reaction mixture was washed with aqueous 1 M HCl (30 mL), saturated aqueous NaHCO<sub>3</sub> (30 mL) and brine (30 mL). The organic layer was collected and dried over Na<sub>2</sub>SO<sub>4</sub>, filtered, and concentrated to give crude product. Then it was purified by silica gel column chromatography to afford the amide product (65~95% yield).

*N,N*-Dimethyl-3-phenylpentanamide (**19**)

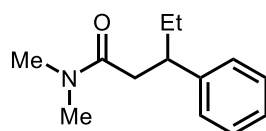

Colorless oil. 234 mg, 42% yield.

<sup>1</sup>H NMR (500 MHz, CDCl<sub>3</sub>) δ 7.32 – 7.25 (m, 2H), 7.23 – 7.16 (m, 3H), 3.18 – 2.99 (m, 1H), 2.87 (s, 3H), 2.84 (s, 3H), 2.64 – 2.51 (m, 2H), 1.86 – 1.73 (m, 1H), 1.68 – 1.55 (m, 1H), 0.79 (t, *J* = 7.3 Hz, 3H).

<sup>13</sup>C NMR (126 MHz, CDCl<sub>3</sub>) δ 171.9, 144.8, 128.3, 127.7, 126.2, 44.1, 40.5, 37.3, 35.4, 28.8, 12.1.

HRMS (DART-MS): *m/z* calcd for C<sub>13</sub>H<sub>20</sub>NO [M+H]<sup>+</sup>: 206.1539, found 206.1537.

IR: 3026, 2960, 1638, 1493, 1452, 1395, 1264, 1142, 1076, 700 (cm<sup>-1</sup>).

*N,N*-Dimethyl-3-phenylhexanamide (**20**)

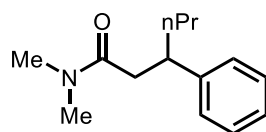

White solid. 198 mg, 38% yield.

<sup>1</sup>H NMR (500 MHz, CDCl<sub>3</sub>) δ 7.31 – 7.24 (m, 2H), 7.23 – 7.14 (m, 3H), 3.23 – 3.12 (m, 1H), 2.87 (s, 3H), 2.83 (s, 3H), 2.57 (h, *J* = 7.8, 7.4 Hz, 2H), 1.76 – 1.67 (m, 1H), 1.65 – 1.54 (m, 1H), 1.26 – 1.08 (m, 2H), 0.84 (t, *J* = 7.3 Hz, 3H).

<sup>13</sup>C NMR (126 MHz, CDCl<sub>3</sub>) δ 171.9, 145.0, 128.3, 127.6, 126.2, 42.1, 40.8, 38.1, 37.3, 35.4, 20.7, 14.0.

HRMS (DART-MS): *m/z* calcd for C<sub>14</sub>H<sub>22</sub>NO [M+H]<sup>+</sup>: 220.1696, found 220.1694.

IR: 2965, 2924, 1630, 1494, 1450, 1420, 1394, 1360, 1335, 1147, 772, 735 (cm<sup>-1</sup>).

*N,N*-Dimethyl-3-(thiophen-3-yl)butanamide (**22**)

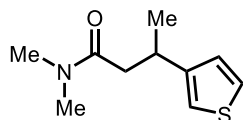

Colorless oil. 135 mg, 40% yield.

$^1\text{H NMR}$  (500 MHz,  $\text{CDCl}_3$ )  $\delta$  7.30 – 7.24 (m, 1H), 7.04 – 6.98 (m, 2H), 3.51 (h,  $J = 6.9$  Hz, 1H), 2.94 (s, 3H), 2.90 (s, 3H), 2.63 (dd,  $J = 14.9, 6.2$  Hz, 1H), 2.49 (dd,  $J = 15.0, 7.9$  Hz, 1H), 1.35 (d,  $J = 6.9$  Hz, 3H).

$^{13}\text{C NMR}$  (126 MHz,  $\text{CDCl}_3$ )  $\delta$  171.7, 147.5, 126.9, 125.4, 119.2, 41.7, 37.3, 35.5, 32.0, 21.4.

HRMS (DART-MS):  $m/z$  calcd for  $\text{C}_{10}\text{H}_{16}\text{NOS}$   $[\text{M}+\text{H}]^+$ : 198.0947, found 198.0946.

IR: 2966, 1629, 1457, 1398, 1320, 1265, 1140, 1100, 1061, 953, 961, 777, 654 ( $\text{cm}^{-1}$ ).

*N,N*-Dimethyl-3-(pyridin-3-yl)butanamide (**23**)

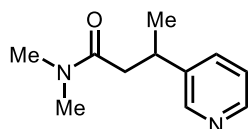

Yellow oil. 98 mg, 16% yield.

$^1\text{H NMR}$  (400 MHz,  $\text{CDCl}_3$ )  $\delta$  8.45 (d,  $J = 30.9$  Hz, 2H), 7.54 (d,  $J = 7.8$  Hz, 1H), 7.19 (dd,  $J = 7.9, 4.7$  Hz, 1H), 3.38 (h,  $J = 7.1$  Hz, 1H), 2.89 (s, 3H), 2.87 (s, 3H), 2.63 – 2.45 (m, 2H), 1.31 (d,  $J = 7.0$  Hz, 3H).

$^{13}\text{C NMR}$  (126 MHz,  $\text{CDCl}_3$ )  $\delta$  171.0, 148.7, 147.7, 141.8, 134.6, 123.4, 41.3, 37.2, 35.4, 34.1, 21.6.

HRMS (DART-MS):  $m/z$  calcd for  $\text{C}_{11}\text{H}_{17}\text{N}_2\text{O}$   $[\text{M}+\text{H}]^+$ : 193.1335, found 193.1333.

IR: 2962, 1698, 1637, 1575, 1396, 1329, 1262, 1146, 1107, 716, 657 ( $\text{cm}^{-1}$ ).

3-(6-Methoxypyridin-3-yl)-*N,N*-dimethylbutanamide (**24**)

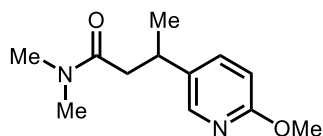

Colorless oil. 112 mg, 34% yield.

$^1\text{H NMR}$  (500 MHz,  $\text{CDCl}_3$ )  $\delta$  8.01 – 7.89 (m, 1H), 7.47 – 7.33 (m, 1H), 6.60 (dd,  $J = 8.6, 1.6$  Hz, 1H), 3.82 (s, 3H), 3.26 (h,  $J = 7.0$  Hz, 1H), 2.84 (s, 3H), 2.82 (s, 3H), 2.54 – 2.37 (m, 2H), 1.22 (d,  $J = 7.0$  Hz, 3H).

$^{13}\text{C NMR}$  (126 MHz,  $\text{CDCl}_3$ )  $\delta$  171.2, 162.8, 144.9, 137.5, 134.4, 110.4, 53.2, 41.5, 37.2, 35.3, 33.2, 21.7.

HRMS (DART-MS):  $m/z$  calcd for  $\text{C}_{12}\text{H}_{19}\text{N}_2\text{O}_2$   $[\text{M}+\text{H}]^+$ : 223.1440, found 223.1431.

IR: 2945, 1699, 1639, 1606, 1573, 1490, 1393, 1325, 1285, 1144, 1062, 830 ( $\text{cm}^{-1}$ ).



*N*-Methyl-3-[4-(trifluoromethyl)phenyl]butanamide (**26**)

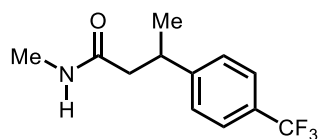

White solid. 150 mg, 42% yield.

$^1\text{H}$  NMR (500 MHz,  $\text{CDCl}_3$ )  $\delta$  7.54 (d,  $J = 8.0$  Hz, 2H), 7.33 (d,  $J = 8.0$  Hz, 2H), 5.41 (brs, 1H), 3.40 (h,  $J = 7.1$  Hz, 1H), 2.72 (d,  $J = 4.8$  Hz, 3H), 2.47 – 2.31 (m, 2H), 1.31 (d,  $J = 6.9$  Hz, 3H).

$^{13}\text{C}$  NMR (126 MHz,  $\text{CDCl}_3$ )  $\delta$  171.7, 150.1, 128.7 (q,  $J = 32.3$  Hz), 127.2, 125.5 (q,  $J = 3.8$  Hz), 124.2 (q,  $J = 271.7$  Hz), 45.2, 36.6, 26.3, 21.4.

$^{19}\text{F}$  NMR (470 MHz,  $\text{CDCl}_3$ )  $\delta$  -62.2.

HRMS (DART-MS):  $m/z$  calcd for  $\text{C}_{12}\text{H}_{15}\text{F}_3\text{NO}$   $[\text{M}+\text{H}]^+$ : 246.1100, found 246.1099.

IR: 3306, 2964, 1637, 1560, 1330, 1286, 1216, 1183, 1156, 1111, 897 ( $\text{cm}^{-1}$ ).

*N*-Benzyl-3-[4-(trifluoromethyl)phenyl]butanamide (**27**)

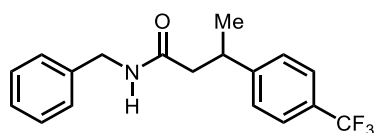

White solid. 122 mg, 29% yield.

$^1\text{H}$  NMR (500 MHz,  $\text{CDCl}_3$ )  $\delta$  7.55 (d,  $J = 8.0$  Hz, 2H), 7.35 (d,  $J = 8.0$  Hz, 2H), 7.31 – 7.22 (m, 3H), 7.11 – 6.97 (m, 2H), 5.71 (brs, 1H), 4.42 (dd,  $J = 14.8, 6.1$  Hz, 1H), 4.28 (dd,  $J = 14.8, 5.3$  Hz, 1H), 3.45 (h,  $J = 7.2$  Hz, 1H), 2.51 (dd,  $J = 14.1, 6.9$  Hz, 1H), 2.45 (dd,  $J = 14.1, 8.2$  Hz, 1H), 1.35 (d,  $J = 7.0$  Hz, 3H).

$^{13}\text{C}$  NMR (126 MHz,  $\text{CDCl}_3$ )  $\delta$  170.9, 149.8 (d,  $J = 1.5$  Hz), 138.0, 130.9 (q,  $J = 3.7$  Hz), 128.7, 127.6, 127.5, 127.3, 125.5 (q,  $J = 3.7$  Hz), 124.3 (d,  $J = 271.8$  Hz), 45.4, 43.5, 36.9, 21.6.

$^{19}\text{F}$  NMR (470 MHz,  $\text{CDCl}_3$ )  $\delta$  -62.3.

HRMS (DART-MS):  $m/z$  calcd for  $\text{C}_{18}\text{H}_{19}\text{F}_3\text{NO}$   $[\text{M}+\text{H}]^+$ : 322.1413, found 322.1412.

IR: 3258, 3080, 2980, 1644, 1564, 1496, 1366, 1175, 1152, 1116, 1014 ( $\text{cm}^{-1}$ ).

1-(Pyrrolidin-1-yl)-3-[4-(trifluoromethyl)phenyl]butan-1-one (**31**)

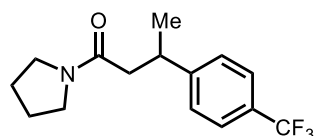

Colorless oil. 166 mg, 41% yield.

$^1\text{H}$  NMR (500 MHz,  $\text{CDCl}_3$ )  $\delta$  7.45 (d,  $J = 8.1$  Hz, 2H), 7.30 (d,  $J = 8.1$  Hz, 2H), 3.45 – 3.21 (m, 4H), 3.18 – 3.05 (m, 1H), 2.46 (h,  $J = 7.8, 7.4$  Hz, 2H), 1.88 – 1.59 (m, 4H), 1.26 (d,  $J = 7.0$  Hz, 3H).

$^{13}\text{C}$  NMR (126 MHz,  $\text{CDCl}_3$ )  $\delta$  169.6, 150.8, 128.3 (q,  $J = 32.2$  Hz), 127.3, 125.2 (q,  $J = 3.8$  Hz), 124.5 (q,  $J = 271.7$  Hz), 46.5, 45.5, 42.9, 36.0, 25.9, 24.2, 21.4.

$^{19}\text{F}$  NMR (470 MHz,  $\text{CDCl}_3$ )  $\delta$  -62.4.

HRMS (DART-MS):  $m/z$  calcd for  $\text{C}_{15}\text{H}_{19}\text{F}_3\text{NO}$   $[\text{M}+\text{H}]^+$ : 286.1413, found 286.1406.

IR: 2969, 2876, 1627, 1436, 1325, 1155, 1114, 1066, 1014, 840, 637 ( $\text{cm}^{-1}$ ).

1-(Piperidin-1-yl)-3-[4-(trifluoromethyl)phenyl]butan-1-one (**32**)

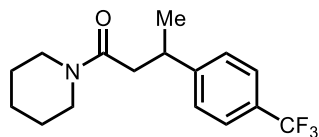

Colorless oil. 145 mg, 38% yield.

$^1\text{H}$  NMR (500 MHz,  $\text{CDCl}_3$ )  $\delta$  7.54 (d,  $J = 8.1$  Hz, 2H), 7.36 (d,  $J = 8.0$  Hz, 2H), 3.59 – 3.51 (m, 1H), 3.50 – 3.39 (m, 2H), 3.36 – 3.23 (m, 2H), 2.62 (dd,  $J = 15.1, 6.8$  Hz, 1H), 2.53 (dd,  $J = 15.1, 7.5$  Hz, 1H), 1.63 – 1.55 (m, 2H), 1.54 – 1.42 (m, 3H), 1.36 – 1.29 (m, 4H).

$^{13}\text{C}$  NMR (126 MHz,  $\text{CDCl}_3$ )  $\delta$  169.6, 150.8, 150.8, 128.53 (q,  $J = 32.3$  Hz), 127.3, 125.40 (q,  $J = 3.8$  Hz), 124.5 (q,  $J = 271.7$  Hz), 46.5, 45.5, 42.9, 36.0, 25.9, 24.2, 21.4.

$^{19}\text{F}$  NMR (470 MHz,  $\text{CDCl}_3$ )  $\delta$  -62.4.

HRMS (DART-MS):  $m/z$  calcd for  $\text{C}_{16}\text{H}_{21}\text{F}_3\text{NO}$   $[\text{M}+\text{H}]^+$ : 300.1570, found 300.1565.

IR: 2936, 2857, 1634, 1438, 1323, 1267, 1217, 1160, 1112, 1067, 837 ( $\text{cm}^{-1}$ ).

1-Morpholino-3-[4-(trifluoromethyl)phenyl]butan-1-one (**33**)

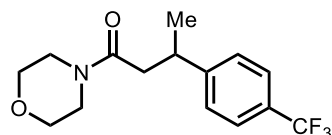

Colorless oil. 151 mg, 37% yield.

$^1\text{H}$  NMR (500 MHz,  $\text{CDCl}_3$ )  $\delta$  7.54 (d,  $J = 8.0$  Hz, 2H), 7.34 (d,  $J = 7.9$  Hz, 2H), 3.66 – 3.49 (m, 5H), 3.47 – 3.35 (m, 3H), 3.34 – 3.24 (m, 1H), 2.61 (dd,  $J = 15.2, 7.0$  Hz, 1H), 2.52 (dd,  $J = 15.2, 7.3$  Hz, 1H), 1.33 (d,  $J = 7.0$  Hz, 3H).

$^{13}\text{C}$  NMR (126 MHz,  $\text{CDCl}_3$ )  $\delta$  169.8, 150.4, 128.7 (q,  $J = 32.3$  Hz), 127.3, 125.5 (q,  $J = 3.8$  Hz), 124.2 (q,  $J = 271.9$  Hz), 66.9, 66.5, 46.1, 41.9, 40.9, 36.4, 21.7.

$^{19}\text{F}$  NMR (470 MHz,  $\text{CDCl}_3$ )  $\delta$  -62.4.

HRMS (DART-MS):  $m/z$  calcd for  $\text{C}_{15}\text{H}_{19}\text{F}_3\text{NO}_2$   $[\text{M}+\text{H}]^+$ : 302.1362, found 302.1360.

IR: 2966, 2858, 1638, 1421, 1360, 1324, 1273, 1161, 1110, 1015, 840 ( $\text{cm}^{-1}$ ).

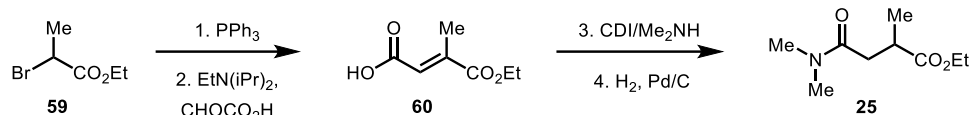

(*E*)-4-ethoxy-3-methyl-4-oxobut-2-enoic acid **60** was prepared according to the published procedure.<sup>29</sup> To a stirred solution of acid **60** (475 mg, 3 mmol, 1 equiv) in dry DCM (15 mL) was added carbonyldiimidazole (CDI, 535 mg, 3.3 mmol, 1.1 equiv) under N<sub>2</sub> atmosphere and the reaction mixture was stirred at room temperature for 1 hour. Dimethylamine solution (1.95 mL, 2 M in THF, 3.9 mmol, 1.3 equiv) was added to the reaction mixture, and the mixture was further stirred at room temperature for 16 hours. After completion of the reaction, the reaction mixture was washed with aqueous 1 M HCl (15 mL), saturated aqueous NaHCO<sub>3</sub> (20 mL) and brine (20 mL). The organic layer was collected and dried over Na<sub>2</sub>SO<sub>4</sub>, filtered and concentrated to give crude amide product, which was used in the next step.

The crude material was dissolved in MeOH (10 mL), followed by the addition of Pd/C (10 wt%, 20 mg), and the reaction was stirred under H<sub>2</sub> atmosphere (balloon) for 16 hours at room temperature. After completion of the reaction, the reaction mixture was filtered through Celite and washed with MeOH (5 mL). The filtrate was concentrated under vacuum to provide the crude product, which was purified by flash chromatography (EtOAc/Hexanes, 70%, v/v).

Ethyl 4-(dimethylamino)-2-methyl-4-oxobutanoate (**25**)

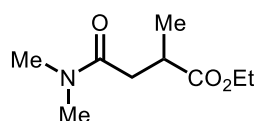

Clear oil. 360 mg, 65% yield over two steps.

<sup>1</sup>H NMR (500 MHz, CDCl<sub>3</sub>) δ 4.21 – 4.07 (m, 2H), 3.08 – 2.83 (m, 7H), 2.77 (dd, *J* = 16.2, 8.5 Hz, 1H), 2.31 (dd, *J* = 16.2, 5.4 Hz, 1H), 1.25 (t, *J* = 7.1 Hz, 3H), 1.21 (d, *J* = 7.2 Hz, 3H).

<sup>13</sup>C NMR (126 MHz, CDCl<sub>3</sub>) δ 176.5, 171.1, 60.6, 37.2, 36.8, 36.1, 35.5, 17.6, 14.3.

HRMS (DART-MS): *m/z* calcd for C<sub>9</sub>H<sub>18</sub>NO<sub>3</sub> [M+H]<sup>+</sup>: 188.1281, found 188.1291.

IR: 2980, 1729, 1644, 1461, 1398, 1372, 1176, 1149, 1025, 805, 755 (cm<sup>-1</sup>).

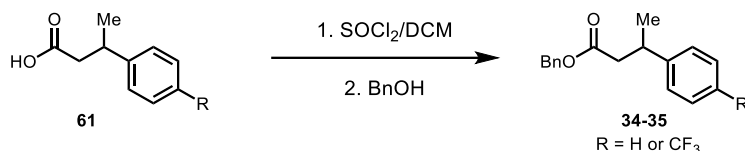

**General procedure.** To a stirred solution of acid **61** (1 mmol, 1 equiv) in dry DCM (10 mL) was added thionyl chloride (2 mmol, 236 mg) and one drop of DMF under N<sub>2</sub> atmosphere and the reaction mixture was stirred at room temperature for 3 hours. The solvent was evaporated to provide acid chloride, which was directly used in the next step. The resulting crude oil was dissolved in dry DCM (10 mL), triethylamine (121 mg, 1.2 mmol, 1.2 equiv) and benzyl alcohol (130 mg, 1.2 mmol, 1.2 equiv) were added at 0 °C, and the reaction mixture was further stirred at room temperature for 16 hours. After completion of the reaction, the reaction mixture was washed with aqueous 1 M HCl (10 mL), saturated aqueous NaHCO<sub>3</sub> (10 mL) and brine (10 mL). The organic layer was collected and dried over Na<sub>2</sub>SO<sub>4</sub>, filtered and concentrated to give crude ester product, which was purified by flash chromatography (EtOAc/Hexanes, 20%, v/v).

#### Benzyl 3-phenylbutanoate (**34**)

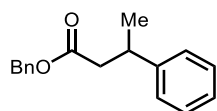

Colorless oil. 95 mg, 37% yield.

<sup>1</sup>H NMR (500 MHz, CDCl<sub>3</sub>) δ 7.42 – 7.16 (m, 10H), 5.08 (s, 2H), 3.33 (h, *J* = 7.2 Hz, 1H), 2.75 – 2.58 (m, 2H), 1.33 (d, *J* = 7.0 Hz, 3H).

<sup>13</sup>C NMR (126 MHz, CDCl<sub>3</sub>) δ 172.2, 145.6, 135.9, 128.5, 128.5, 128.2, 126.8, 126.4, 66.2, 42.9, 36.6, 21.9. The NMR spectra is in agreement with published data.<sup>30</sup>

HRMS (DART-MS): *m/z* calcd for C<sub>17</sub>H<sub>18</sub>O<sub>2</sub> [M+H]<sup>+</sup>: 255.1379, found 255.1378.

IR: 2980, 2253, 1731, 1456, 1380, 1265, 1161, 1086, 904, 727 (cm<sup>-1</sup>).

#### Benzyl 3-[4-(trifluoromethyl)phenyl]butanoate (**35**)

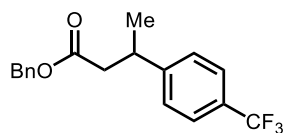

Colorless oil. 104 mg, 32% yield.

<sup>1</sup>H NMR (500 MHz, CDCl<sub>3</sub>) δ 7.56 (d, *J* = 8.1 Hz, 2H), 7.38 – 7.31 (m, 5H), 7.24 (dd, *J* = 6.6, 2.7 Hz, 2H), 5.08 (s, 2H), 3.39 (h, *J* = 7.2 Hz, 1H), 2.76 – 2.62 (m, 2H), 1.34 (d, *J* = 7.1 Hz, 3H).

<sup>13</sup>C NMR (126 MHz, CDCl<sub>3</sub>) δ 171.7, 149.5, 135.7, 128.8 (q, *J* = 32.4 Hz), 128.5, 128.3, 128.2, 127.2, 125.5 (q, *J* = 3.8 Hz), 124.2 (q, *J* = 271.8 Hz), 66.3, 42.5, 36.5, 21.9.

<sup>19</sup>F NMR (470 MHz, CDCl<sub>3</sub>) δ -62.4.

HRMS (DART-MS): *m/z* calcd for C<sub>18</sub>H<sub>17</sub>O<sub>2</sub>F<sub>3</sub> [M+H]<sup>+</sup>: 323.1253, found 323.1253.

IR: 2970, 1731, 1619, 1498, 1456, 1421, 1324, 1161, 1115, 907, 729 (cm<sup>-1</sup>).

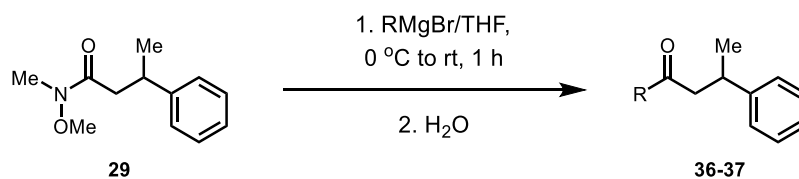

To a stirred solution of Weinreb amide **29** (0.4 mmol, 1.0 equiv) in dry THF (5 mL) was added Grignard reagent (MeMgBr or PhMgBr, 0.44 mmol, 1.1 equiv) dropwise at 0 °C. The reaction mixture was allowed to stir at room temperature for 1 hour. After completion of the reaction, the reaction mixture was quenched with saturated aqueous NH<sub>4</sub>Cl followed by extraction with Et<sub>2</sub>O (3 x 10 mL). The combined organic layers were washed with brine, dried over Na<sub>2</sub>SO<sub>4</sub>, filtered and concentrated to give the crude product, which was purified by flash chromatography (EtOAc/Hexanes, 10%, v/v).

#### 4-Phenylpentan-2-one (**36**)

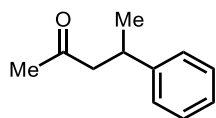

Clear oil. 45 mg, 69% yield.

<sup>1</sup>H NMR (500 MHz, CDCl<sub>3</sub>) δ 7.35 – 7.14 (m, 5H), 3.31 (h, *J* = 7.0 Hz, 1H), 2.76 (dd, *J* = 16.3, 6.5 Hz, 1H), 2.66 (dd, *J* = 16.3, 7.8 Hz, 1H), 2.07 (s, 3H), 1.27 (d, *J* = 6.9 Hz, 3H).

<sup>13</sup>C NMR (126 MHz, CDCl<sub>3</sub>) δ 208.0, 146.3, 128.7, 126.9, 126.5, 52.1, 35.6, 30.7, 22.1.

The NMR spectra is in agreement with published data.<sup>6</sup>

HRMS (DART-MS): *m/z* calcd for C<sub>11</sub>H<sub>15</sub>O [M+H]<sup>+</sup>: 163.1117, found 163.1116.

IR: 2962, 1714, 1494, 1452, 1357, 1161, 1025, 758, 699 (cm<sup>-1</sup>).

#### 1,3-Diphenylbutan-1-one (**37**)

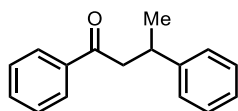

Light yellow solid. 60 mg, 67% yield.

<sup>1</sup>H NMR (500 MHz, CDCl<sub>3</sub>) δ 7.94 (dd, *J* = 8.3, 1.4 Hz, 2H), 7.58 – 7.53 (m, 1H), 7.48 – 7.42 (m, 2H), 7.34 – 7.27 (m, 4H), 7.24 – 7.18 (m, 1H), 3.52 (h, *J* = 6.9 Hz, 1H), 3.31 (dd, *J* = 16.5, 5.7 Hz, 1H), 3.20 (dd, *J* = 16.5, 8.4 Hz, 1H), 1.36 (d, *J* = 6.9 Hz, 3H).

<sup>13</sup>C NMR (126 MHz, CDCl<sub>3</sub>) δ 199.2, 146.7, 137.3, 133.1, 128.7, 128.7, 128.2, 127.0, 126.4, 47.2, 35.7, 22.0.

The NMR spectra is in agreement with published data.<sup>31</sup>

HRMS (DART-MS): *m/z* calcd for C<sub>16</sub>H<sub>17</sub>O [M+H]<sup>+</sup>: 225.1274, found 225.1275.

IR: 2970, 1662, 1597, 1581, 1449, 1270, 1202, 990, 753, 690 (cm<sup>-1</sup>).

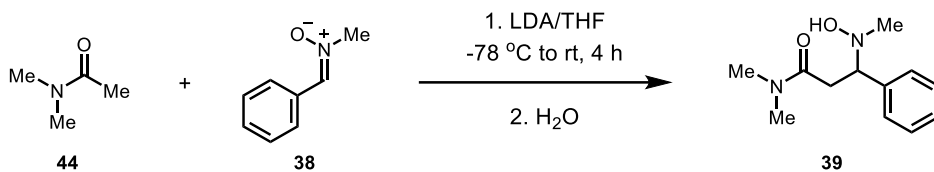

To a stirred solution of *N,N*-dimethylacetamide **44** (261 mg, 3 mmol, 1.5 equiv) in dry THF (5 mL) was added lithium diisopropylamide (LDA, 3 mmol, 1.5 equiv) under N<sub>2</sub> atmosphere and cooling with dry ice/acetone bath, the reaction mixture was stirred at -78 °C for 20 min. *C*-Phenyl-*N*-methyl-nitrone **38** (270 mg, 1 mmol, 1 equiv) was added to the reaction mixture, the mixture was then warmed up to room temperature and further stirred for 4 hours. After completion of the reaction, the reaction mixture was quenched with saturated NH<sub>4</sub>Cl aqueous solution, and then the organic solvents were evaporated under reduced pressure. The resulting mixture was extracted with DCM and washed with brine. The organic layer was collected and dried over Na<sub>2</sub>SO<sub>4</sub>, filtered and concentrated to give crude product **39**, which was purified by flash chromatography (MeOH/DCM, 5%, v/v).

### 3-[Hydroxy(methyl)amino]-*N,N*-dimethyl-3-phenylpropanamide (**39**)

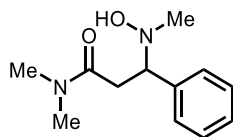

White solid. 240 mg, 54% yield.

<sup>1</sup>H NMR (500 MHz, CDCl<sub>3</sub>) δ 7.38 – 7.26 (m, 5H), 6.30 (s, 1H), 4.07 (t, *J* = 6.1 Hz, 1H), 3.10 (dd, *J* = 15.0, 6.3 Hz, 1H), 2.91 (s, 3H), 2.85 – 2.76 (m, 4H), 2.50 (s, 3H).

<sup>13</sup>C NMR (126 MHz, CDCl<sub>3</sub>) δ 171.6, 128.6, 128.4, 127.9, 70.7, 46.3, 38.3, 37.6, 35.7.

HRMS (DART-MS): *m/z* calcd for C<sub>12</sub>H<sub>19</sub>N<sub>2</sub>O<sub>2</sub> [M+H]<sup>+</sup>: 223.1441, found 223.1439.

IR: 2964, 2876, 1634, 1394, 1142, 1046, 837, 778, 617 (cm<sup>-1</sup>).

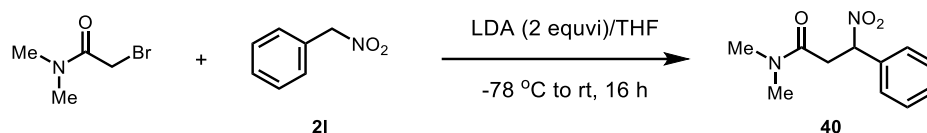

To a stirred solution of (nitromethyl)benzene **21** (69 mg, 0.5 mmol, 1 equiv) in dry THF (2 mL) was added lithium diisopropylamide (LDA, 1 mmol, 2 equiv) under N<sub>2</sub> atmosphere and cooling with dry ice/acetone bath, the reaction mixture was stirred at -78 °C for 1 hour. 2-Bromo-*N,N*-dimethylacetamide (83 mg, 0.5 mmol, 1 equiv) was added to the reaction mixture, the mixture was then warmed up to room temperature and further stirred for 16 hours. After completion of the reaction, the reaction mixture was quenched with acetic acid (120 mg, 4 equiv). Solvents were evaporated under reduced pressure to give a crude oil, which was purified by flash chromatography (EtOAc/Hexanes, 50%, v/v).

*N,N*-Dimethyl-3-nitro-3-phenylpropanamide (**40**)

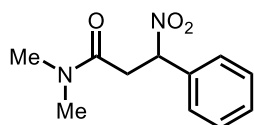

Light yellow oil. 25 mg, 23% yield.

<sup>1</sup>H NMR (500 MHz, CDCl<sub>3</sub>) δ 7.46 – 7.36 (m, 5H), 6.05 (dd, *J* = 10.4, 3.4 Hz, 1H), 3.72 (dd, *J* = 17.0, 10.4 Hz, 1H), 3.05 (s, 3H), 2.95 (s, 3H), 2.80 (dd, *J* = 17.0, 3.5 Hz, 1H).

<sup>13</sup>C NMR (126 MHz, CDCl<sub>3</sub>) δ 168.1, 134.7, 130.0, 129.3, 127.5, 86.6, 37.6, 37.1, 35.6.

HRMS (DART-MS): *m/z* calcd for C<sub>11</sub>H<sub>14</sub>NO [M-HNO<sub>2</sub>+H]<sup>+</sup>: 176.1070, found 176.1069.

IR: 2933, 1642, 1549, 1497, 1419, 1369, 1266, 1146, 860, 719, 695 (cm<sup>-1</sup>).

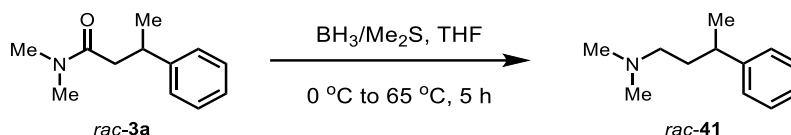

To a stirred solution of *N,N*-Dimethyl-3-phenylbutanamide (50 mg, 0.26 mmol, 1 equiv) in dry THF (3 mL) was slowly added  $\text{BH}_3 \cdot \text{Me}_2\text{S}$  (2 M solution in THF, 0.39 mL, 0.78 mmol, 3 equiv) under  $\text{N}_2$  atmosphere and cooling with an ice bath. The reaction mixture was allowed to warm up to room temperature and then stirred at 65 °C for 5 hours. After completion of the reaction, the reaction mixture was quenched with saturated  $\text{NH}_4\text{Cl}$  aqueous solution (10 mL) and extracted with EtOAc (3 x 15 mL). The organic layer was collected and dried over  $\text{Na}_2\text{SO}_4$ , filtered and concentrated to give the crude product, which was purified by preparative thin layer chromatography (EtOAc/Hexanes, 20%, *v/v*).

*N,N*-Dimethyl-3-phenylbutan-1-amine (*rac-41*)

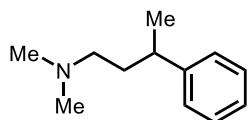

Clear oil. 35 mg, 76% yield.

$^1\text{H NMR}$  (500 MHz,  $\text{CDCl}_3$ )  $\delta$  7.31 (t,  $J = 7.6$  Hz, 2H), 7.24 – 7.16 (m, 3H), 2.78 – 2.62 (m, 2H), 2.55 – 2.49 (m, 1H), 2.51 (s, 3H), 2.50 (s, 3H), 2.09 – 1.96 (m, 2H), 1.30 (d,  $J = 7.0$  Hz, 3H).

$^{13}\text{C NMR}$  (126 MHz,  $\text{CDCl}_3$ )  $\delta$  145.9, 128.8, 126.9, 126.6, 63.5, 51.9, 51.2, 38.5, 32.0, 23.0.

HRMS (DART-MS):  $m/z$  calcd for  $\text{C}_{12}\text{H}_{20}\text{N}$   $[\text{M}+\text{H}]^+$ : 178.1590, found 178.1592.

IR: 2969, 1630, 1494, 1453, 1378, 1246, 1166, 1024, 763, 701 ( $\text{cm}^{-1}$ ).

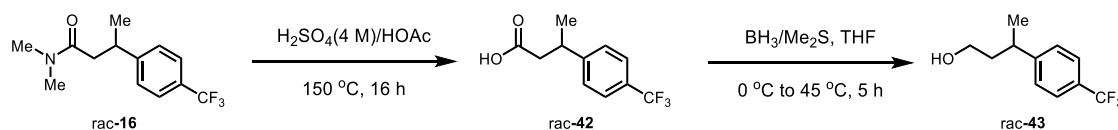

Adapted from the method by A. Link *et al.*<sup>7</sup> The amide *rac-16* (130 mg, 0.5 mmol) was dissolved in 2 mL of mixed acid solution (1 mL of 4 M  $\text{H}_2\text{SO}_4$  and 1 mL of acetic acid) at room temperature. The reaction mixture was stirred at 150 °C for 16 hours. After completion of the reaction, the reaction mixture was diluted with water (5 mL) and basified with saturated  $\text{Na}_2\text{CO}_3$  solution, the mixture was extracted with DCM (5 mL). The aqueous layer was acidified using 1 M HCl to pH 2.0 and extracted with EtOAc (3 x 10 mL), the organic layers were collected and dried over  $\text{Na}_2\text{SO}_4$ , filtered and concentrated to give the acid product *rac-42*.

To a stirred solution of acid *rac-42* (52 mg, 0.2 mmol, 1 equiv) in dry THF (3 mL) was slowly added  $\text{BH}_3 \cdot \text{Me}_2\text{S}$  (2 M solution in THF, 0.3 mL, 0.6 mmol, 3 equiv) under  $\text{N}_2$  atmosphere and cooling with an ice bath. The reaction mixture was allowed to warm up to room temperature and then stirred at 45 °C for 5 hours. After completion of the reaction, the reaction mixture was quenched with saturated  $\text{NH}_4\text{Cl}$



aqueous solution (10 mL) and extracted with EtOAc (3 x 15 mL). The organic layer was collected and dried over Na<sub>2</sub>SO<sub>4</sub>, filtered and concentrated to give crude product *rac*-**43**, which was purified by preparative thin layer chromatography (EtOAc/Hexanes, 50%, v/v).

3-[4-(Trifluoromethyl)phenyl]butanoic acid (*rac*-**42**)

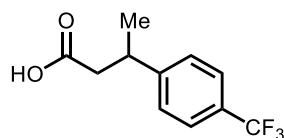

White solid. 82 mg, 71% yield.

<sup>1</sup>H NMR (500 MHz, CDCl<sub>3</sub>) δ 7.56 (d, *J* = 8.1 Hz, 2H), 7.34 (d, *J* = 8.0 Hz, 2H), 3.34 (h, *J* = 7.2 Hz, 1H), 2.65 (qd, *J* = 15.9, 7.5 Hz, 2H), 1.33 (d, *J* = 7.0 Hz, 3H).

<sup>13</sup>C NMR (126 MHz, CDCl<sub>3</sub>) δ 177.7 (d, *J* = 7.4 Hz), 149.5, 129.0 (q, *J* = 32.4 Hz), 127.3, 125.7 (q, *J* = 3.8 Hz), 124.3 (q, *J* = 271.9 Hz), 42.2, 36.2, 21.9.

<sup>19</sup>F NMR (470 MHz, CDCl<sub>3</sub>) δ -62.43.

HRMS (DART-MS): *m/z* calcd for C<sub>11</sub>H<sub>12</sub>O<sub>2</sub>F<sub>3</sub> [M+H]<sup>+</sup>: 233.0784, found 233.0788.

IR: 2981, 1704, 1618, 1436, 1327, 1285, 1121, 1017, 940, 876, 836, 693 (cm<sup>-1</sup>).

3-[4-(Trifluoromethyl)phenyl]butan-1-ol (*rac*-**43**)

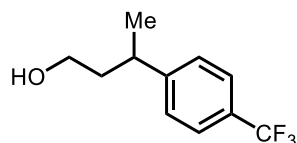

Clear oil. 32 mg, 73% yield.

<sup>1</sup>H NMR (500 MHz, CDCl<sub>3</sub>) δ 7.55 (d, *J* = 8.1 Hz, 2H), 7.32 (d, *J* = 8.0 Hz, 2H), 3.63 – 3.48 (m, 2H), 3.04 – 2.93 (m, 1H), 1.94 – 1.78 (m, 2H), 1.29 (d, *J* = 7.0 Hz, 3H), 1.28 (brs, 1H).

<sup>13</sup>C NMR (126 MHz, CDCl<sub>3</sub>) δ 151.1 (d, *J* = 1.5 Hz), 128.6 (q, *J* = 32.3 Hz), 127.5, 125.6 (q, *J* = 3.7 Hz), 124.4 (q, *J* = 272.1 Hz), 60.9, 40.8, 36.4, 22.2.

<sup>19</sup>F NMR (470 MHz, CDCl<sub>3</sub>) δ -62.3.

The NMR spectra is in agreement with published data.<sup>8</sup>

HRMS (DART-MS): *m/z* calcd for C<sub>11</sub>H<sub>14</sub>OF<sub>3</sub> [M+H]<sup>+</sup>: 219.0991, found 219.0993.

IR: 2970, 1619, 1420, 1379, 1323, 1161, 1117, 1016, 837, 606 (cm<sup>-1</sup>).

### Density functional theory (DFT) calculations

All DFT computations were carried out using the Gaussian 16, Revision C.01 program<sup>32</sup> and the  $\omega$ B97X-D functional.<sup>33</sup> All structures were optimized at the  $\omega$ B97X-D/6-311+G(d,p) level of theory.<sup>33</sup> Higher level of theory single point calculations were performed at the  $\omega$ B97X-D/6-311+G(d,p) level of theory<sup>33</sup> with polarizable continuum model (IEFPCM) in water.<sup>34-36</sup> Computed structures were illustrated with CYLview20.<sup>37</sup> Simplified model of FMN<sub>sq</sub> and FMN were used as previous computational works.<sup>38,39</sup>

For the photoenzymatic reactions showed in Supplementary Fig. 12 (the model reaction,  $\alpha$ -chloroamide **1a** couple with nitroalkane **2a**) and Supplementary Fig. 13 ( $\alpha$ -chloroamide **1a** couple with nitroalkane **2l**), the common radical species **Int-1** was initiated via SET from the photoexcited FMN<sub>hq</sub> in the enzyme active-site by forming a CT complex (Supplementary Fig. 4a).<sup>16</sup> For the model reaction, the addition step of radical **Int-1** to nitronate **5** give rise to the key intermediate radical anion **Int-2** with a free energy barrier of 9.9 kcal mol<sup>-1</sup>. Subsequently, the radical anion **Int-2** could readily undergo a rapid and irreversible C–N bond cleavage to generate a nitrite ion and a benzylic radical **Int-3** (free energy barrier 9.6 kcal/mol), which is then terminated through HAT by FMN<sub>sq</sub> to provide the final product **3a** (Supplementary Fig. 12).

For the enzymatic reaction of  $\alpha$ -chloroamide **1a** with nitroalkane **2l** (Supplementary Fig. 13), the radical addition of **Int-1** to nitronate **2l'** provide the key intermediate radical anion **Int-2'** with a free energy barrier of 10.0 kcal mol<sup>-1</sup>, which is very close to that of the model reaction. Similarly, the radical anion **Int-2'** undergo irreversible C–N bond cleavage to generate a nitrite ion and a benzylic radical **Int-3'** with a free energy barrier of 13.4 kcal/mol, which is higher than that of the corresponding step (9.6 kcal/mol) in the model reaction, indicating a relative slower denitration step when compared to the model reaction. The resulting radical **Int-3'** is then quenched through HAT by FMN<sub>sq</sub> to provide the cross-coupling product **18**. Alternatively, due to the relative slower denitration step of **Int-2'**, the radical anion **Int-2'** could also be partially oxidized by FMN<sub>sq</sub> to provide the other product **40**.

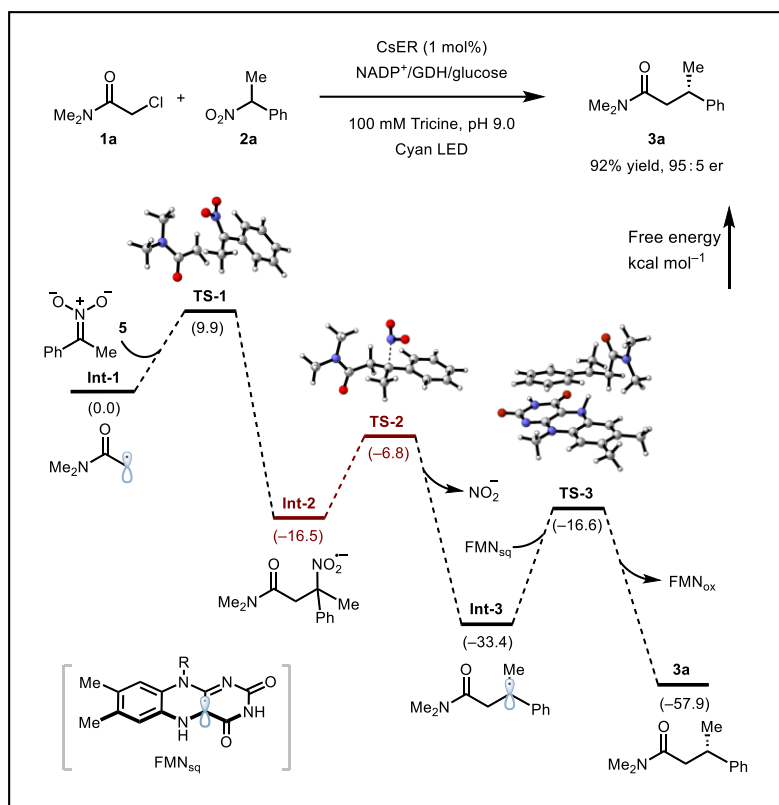

Supplementary Fig. 12. Energy diagram of the model reaction (**1a** reacts with **2a**).

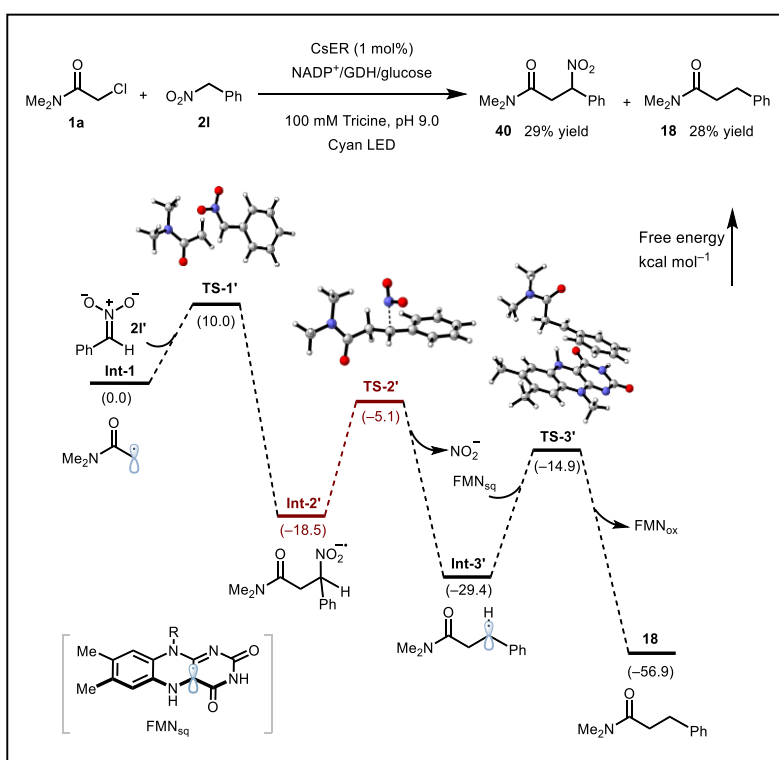

Supplementary Fig. 13. Energy diagram of **1a** reacts with **2l**.

**Atomic coordinates**

Note: energies reported below are in units of hartrees.

**Int-1**

Electronic Energy: -287.161196

Thermal correction to Enthalpy: 0.125355

Thermal correction to Gibbs Free Energy: 0.084403

|   |             |             |             |
|---|-------------|-------------|-------------|
| C | 0.78351800  | -0.18928000 | -0.02121800 |
| O | 1.24359700  | -1.32928100 | -0.01084500 |
| N | -0.56842600 | 0.05163200  | -0.07091100 |
| C | -1.48471900 | -1.06659600 | 0.04155900  |
| H | -2.00588400 | -1.05048300 | 1.00630100  |
| H | -2.22917400 | -1.02633600 | -0.75927500 |
| H | -0.91864900 | -1.99162200 | -0.03875600 |
| C | -1.14798700 | 1.37964500  | -0.00992800 |
| H | -2.18246600 | 1.32125100  | -0.35159400 |
| H | -1.15024100 | 1.79001600  | 1.00772100  |
| H | -0.62794000 | 2.07274100  | -0.67275300 |
| C | 1.68714400  | 0.95230000  | 0.02901700  |
| H | 2.74273900  | 0.72302000  | -0.01430800 |
| H | 1.37409100  | 1.97781900  | 0.16922000  |

**5**

Electronic Energy: -514.871271

Thermal correction to Enthalpy: 0.156779

Thermal correction to Gibbs Free Energy: 0.110289

|   |             |             |             |
|---|-------------|-------------|-------------|
| C | -1.07151700 | 0.46059500  | 0.00125400  |
| C | 0.34040500  | 0.14796000  | 0.00053200  |
| C | 1.26906600  | 1.22324100  | -0.00187800 |
| C | 0.91680500  | -1.14945100 | 0.00229500  |
| C | 2.64122200  | 1.02371100  | -0.00237900 |
| H | 0.90658700  | 2.24336700  | -0.00376700 |
| C | 2.29149500  | -1.33369100 | 0.00181400  |
| H | 0.25243000  | -1.99878300 | 0.00396900  |
| C | 3.17811700  | -0.25979300 | -0.00048800 |
| H | 3.29922400  | 1.88896800  | -0.00440000 |
| H | 2.67759300  | -2.34991300 | 0.00333300  |
| H | 4.25186600  | -0.41789600 | -0.00089700 |
| C | -1.51686600 | 1.89479800  | 0.00315800  |
| H | -1.14891200 | 2.43793200  | 0.88538800  |
| H | -1.15788100 | 2.43827100  | -0.88266100 |
| H | -2.60334500 | 1.92989800  | 0.00836300  |
| N | -2.05503700 | -0.48601400 | -0.00081500 |

|   |             |             |             |
|---|-------------|-------------|-------------|
| O | -1.77722800 | -1.71641600 | -0.00166400 |
| O | -3.27085600 | -0.13533000 | -0.00202100 |

**TS-1**

Electronic Energy: -802.041681

Thermal correction to Enthalpy: 0.284632

Thermal correction to Gibbs Free Energy: 0.219639

|   |             |             |             |
|---|-------------|-------------|-------------|
| C | -1.97042800 | -1.15547200 | -0.68982800 |
| O | -2.14746300 | -2.31080900 | -0.27060700 |
| N | -3.03533900 | -0.26374000 | -0.71932500 |
| C | -4.23398200 | -0.60611100 | 0.00877900  |
| H | -4.28211600 | -0.06392200 | 0.96462200  |
| H | -5.12199200 | -0.34258700 | -0.57940900 |
| H | -4.23225200 | -1.67605300 | 0.20645200  |
| C | -2.91165000 | 1.14388600  | -1.04421000 |
| H | -3.85568100 | 1.48289400  | -1.48694400 |
| H | -2.69002800 | 1.75067500  | -0.15827100 |
| H | -2.12361800 | 1.31321200  | -1.77427800 |
| C | -0.66873700 | -0.71056600 | -1.11987200 |
| H | 0.05926100  | -1.50064800 | -1.24451500 |
| H | -0.49505800 | 0.21311700  | -1.65365000 |
| C | 0.38699600  | 0.19840800  | 0.77964700  |
| C | 1.75504800  | 0.03902200  | 0.25911000  |
| C | 2.56003600  | -0.99437900 | 0.77771000  |
| C | 2.32362600  | 0.82160200  | -0.76604400 |
| C | 3.84687800  | -1.22857000 | 0.31299100  |
| H | 2.17732700  | -1.62789800 | 1.56715000  |
| C | 3.61222600  | 0.58335200  | -1.22409600 |
| H | 1.73603200  | 1.62234700  | -1.18700600 |
| C | 4.39009300  | -0.44050900 | -0.69460300 |
| H | 4.42881600  | -2.03559200 | 0.74823500  |
| H | 4.01074200  | 1.21104900  | -2.01583100 |
| H | 5.39542500  | -0.62202500 | -1.06066800 |
| C | -0.11126600 | -0.74419800 | 1.83679400  |
| H | 0.04765600  | -1.77916900 | 1.52872800  |
| H | 0.37852400  | -0.57406600 | 2.80570500  |
| H | -1.17999400 | -0.60310600 | 1.97854100  |
| N | -0.20813900 | 1.44928400  | 0.79136800  |
| O | 0.11074000  | 2.32292200  | -0.05638100 |
| O | -1.14099500 | 1.67465900  | 1.60680900  |

**Int-2**

Electronic Energy: -802.087790

Thermal correction to Enthalpy: 0.287803

Thermal correction to Gibbs Free Energy: 0.223776

|   |             |             |             |
|---|-------------|-------------|-------------|
| C | -2.06453100 | -0.85551700 | -0.39178700 |
| O | -2.46795800 | -1.85514100 | 0.18825100  |
| N | -2.94511100 | 0.00605700  | -1.00494100 |
| C | -4.34725700 | -0.19979700 | -0.70199500 |
| H | -4.61100200 | 0.25206900  | 0.26381700  |
| H | -4.95311600 | 0.26281700  | -1.48696200 |
| H | -4.56055100 | -1.26576900 | -0.65200500 |
| C | -2.62321400 | 1.38441700  | -1.33076100 |
| H | -3.22770900 | 1.69182800  | -2.19237000 |
| H | -2.80961500 | 2.03468900  | -0.47137000 |
| H | -1.57317300 | 1.49941200  | -1.58454400 |
| C | -0.57476400 | -0.66576800 | -0.61978300 |
| H | -0.21436800 | -1.64651900 | -0.94432700 |
| H | -0.36662300 | 0.03124900  | -1.43172100 |
| C | 0.27920100  | -0.25026300 | 0.60566700  |
| C | 1.71122900  | -0.15001000 | 0.08200200  |
| C | 2.54127500  | -1.26798000 | 0.03570500  |
| C | 2.19080000  | 1.04603100  | -0.45961200 |
| C | 3.81256100  | -1.20253700 | -0.53022800 |
| H | 2.19786600  | -2.20938300 | 0.44929300  |
| C | 3.45512300  | 1.11472800  | -1.02724900 |
| H | 1.56841400  | 1.92939500  | -0.39527200 |
| C | 4.27615500  | -0.00961300 | -1.06660800 |
| H | 4.43908300  | -2.08911500 | -0.54759000 |
| H | 3.80920200  | 2.05844700  | -1.43062400 |
| H | 5.26738500  | 0.04793900  | -1.50537400 |
| C | 0.14032300  | -1.23823400 | 1.76940500  |
| H | 0.28824200  | -2.27393800 | 1.45311400  |
| H | 0.86303700  | -0.97571800 | 2.54469200  |
| H | -0.86885400 | -1.15284000 | 2.17121300  |
| N | -0.17223700 | 1.08922700  | 1.09571500  |
| O | 0.65047200  | 1.67713300  | 1.90118000  |
| O | -1.45853900 | 1.16622100  | 1.27757900  |

## TS-2

Electronic Energy: -802.069332

Thermal correction to Enthalpy: 0.285368

Thermal correction to Gibbs Free Energy: 0.220736

|   |             |             |             |
|---|-------------|-------------|-------------|
| C | -2.16443100 | -1.10121200 | -0.28335500 |
| O | -2.39799200 | -2.25278100 | 0.07034900  |
| N | -3.15239300 | -0.15357700 | -0.28023000 |
| C | -4.45496800 | -0.50524000 | 0.23997900  |
| H | -4.65943800 | 0.04410600  | 1.16825200  |

|   |             |             |             |
|---|-------------|-------------|-------------|
| H | -5.23419600 | -0.24735200 | -0.48724800 |
| H | -4.48121800 | -1.57374800 | 0.44166000  |
| C | -2.99055600 | 1.24895400  | -0.61234300 |
| H | -3.78701500 | 1.54725300  | -1.30534100 |
| H | -3.06653800 | 1.86813500  | 0.28946600  |
| H | -2.02553900 | 1.45861000  | -1.06743200 |
| C | -0.76966900 | -0.71763900 | -0.74202100 |
| H | -0.36034200 | -1.64900700 | -1.14312200 |
| H | -0.78256400 | 0.01578200  | -1.55533800 |
| C | 0.14933000  | -0.19730400 | 0.35918000  |
| C | 1.57126700  | -0.38322400 | 0.11072600  |
| C | 2.08233800  | -0.47601900 | -1.20249900 |
| C | 2.51776300  | -0.37687200 | 1.15664900  |
| C | 3.44158800  | -0.58797000 | -1.44605500 |
| H | 1.40324100  | -0.43054300 | -2.04465100 |
| C | 3.87623800  | -0.49270700 | 0.90723300  |
| H | 2.18187000  | -0.27848700 | 2.18089300  |
| C | 4.35607700  | -0.60628200 | -0.39533200 |
| H | 3.79382900  | -0.65088900 | -2.47164900 |
| H | 4.57148400  | -0.48829800 | 1.74188600  |
| H | 5.42034000  | -0.69374900 | -0.58840300 |
| C | -0.33210600 | -0.32295200 | 1.77995500  |
| H | -0.16968800 | -1.33104700 | 2.18159900  |
| H | 0.18324900  | 0.40695400  | 2.40841300  |
| H | -1.40028000 | -0.10329800 | 1.84863000  |
| N | 0.01288700  | 1.76786600  | 0.13979000  |
| O | 0.08436900  | 2.11196500  | -1.06546200 |
| O | 0.65013700  | 2.38036100  | 1.01420800  |

## Int-3

Electronic Energy: -596.833152

Thermal correction to Enthalpy: 0.271720

Thermal correction to Gibbs Free Energy: 0.211307

|   |             |             |             |
|---|-------------|-------------|-------------|
| C | -1.84181400 | 0.26914800  | 0.29670300  |
| O | -1.54086100 | 0.61948000  | 1.42259900  |
| N | -3.02336900 | -0.36078100 | 0.01635300  |
| C | -3.89616800 | -0.74483600 | 1.11078900  |
| H | -3.52249600 | -0.30039300 | 2.03004400  |
| H | -4.91421500 | -0.39055700 | 0.92281600  |
| H | -3.91955500 | -1.83493100 | 1.22395300  |
| C | -3.37277600 | -0.88687600 | -1.28868300 |
| H | -3.00734000 | -1.91209900 | -1.43133300 |
| H | -4.46100100 | -0.89998300 | -1.38150700 |
| H | -2.98434600 | -0.26151800 | -2.09086400 |

|   |             |             |             |   |             |             |             |
|---|-------------|-------------|-------------|---|-------------|-------------|-------------|
| C | -0.90860300 | 0.54075900  | -0.89277900 | H | 5.30682400  | 1.10603300  | 0.87973300  |
| H | -0.77782300 | -0.37337800 | -1.47693800 | H | 5.30668700  | 1.10617700  | -0.87991900 |
| H | -1.41280800 | 1.25402000  | -1.55652300 | H | 4.53032600  | 2.42743800  | 0.00007200  |
| C | 1.53509600  | 0.27568600  | -0.22117400 | C | 4.69940800  | -1.59002100 | -0.00009200 |
| C | 2.79919200  | 0.83313300  | 0.09967700  | H | 5.30384400  | -1.35055900 | -0.88015100 |
| C | 1.46164900  | -1.13925600 | -0.27913100 | H | 5.30394100  | -1.35057200 | 0.87990500  |
| C | 3.90492900  | 0.03408800  | 0.32529800  | H | 4.51749900  | -2.66567000 | -0.00008900 |
| H | 2.90766200  | 1.90881700  | 0.16580800  | N | -0.24762300 | 1.30592300  | 0.00013300  |
| C | 2.57214900  | -1.93006500 | -0.04878000 | C | -0.24794100 | 2.76158000  | -0.00004900 |
| H | 0.51530300  | -1.62540800 | -0.48341500 | H | 0.25624000  | 3.13915400  | 0.89309300  |
| C | 3.80548400  | -1.35405700 | 0.25096900  | H | 0.25655700  | 3.13891800  | -0.89311100 |
| H | 4.85698200  | 0.49576600  | 0.56395200  | H | -1.28289200 | 3.09154200  | -0.00027000 |
| H | 2.47691900  | -3.00959800 | -0.09437700 | N | -2.56892300 | 1.31296700  | -0.00006600 |
| H | 4.67343500  | -1.97763800 | 0.43101600  | C | -3.77246800 | 0.64859300  | -0.00005600 |
| C | 0.40521700  | 1.11038900  | -0.45827900 | O | -4.84718100 | 1.20295100  | 0.00009600  |
| C | 0.46961000  | 2.58554800  | -0.21075300 | N | -3.74373700 | -0.76625700 | -0.00027300 |
| H | -0.50856800 | 3.04907400  | -0.34838700 | H | -4.64286800 | -1.22674100 | 0.00003100  |
| H | 0.78933000  | 2.80008200  | 0.81440800  | N | -0.22424600 | -1.45388800 | 0.00006600  |
| H | 1.17521000  | 3.08540400  | -0.88705400 | H | -0.28282800 | -2.46567100 | 0.00012000  |
|   |             |             |             | O | -2.63585500 | -2.77800000 | 0.00010300  |

### NO<sub>2</sub><sup>-</sup>

Electronic Energy: -205.253707

Thermal correction to Enthalpy: 0.012047

Thermal correction to Gibbs Free Energy: -0.015457

|   |             |             |            |
|---|-------------|-------------|------------|
| N | 0.00000000  | 0.45604800  | 0.00000000 |
| O | 1.06261900  | -0.19961700 | 0.00000000 |
| O | -1.06261900 | -0.19942500 | 0.00000000 |

### FMN<sub>sq</sub>

Electronic Energy: -872.679196

Thermal correction to Enthalpy: 0.270196

Thermal correction to Gibbs Free Energy: 0.208394

|   |             |             |             |
|---|-------------|-------------|-------------|
| C | 3.40675900  | 0.58772000  | 0.00000900  |
| C | 2.19865900  | 1.27540900  | 0.00007900  |
| C | 0.97003200  | 0.61355900  | 0.00008000  |
| C | 0.98475000  | -0.79096400 | 0.00005500  |
| C | 2.19300500  | -1.48414600 | 0.00001100  |
| C | 3.40768600  | -0.81900000 | -0.00002500 |
| C | -1.40023900 | -0.78472400 | 0.00002700  |
| C | -1.45438900 | 0.63173500  | -0.00002600 |
| C | -2.62361100 | -1.55490300 | -0.00001400 |
| H | 2.22189600  | 2.35691300  | 0.00013300  |
| H | 2.16857500  | -2.56958300 | 0.00000100  |
| C | 4.70371400  | 1.35045900  | -0.00002600 |

### TS-3

Electronic Energy: -1469.513468

Thermal correction to Enthalpy: 0.542288

Thermal correction to Gibbs Free Energy: 0.447655

|   |             |             |             |
|---|-------------|-------------|-------------|
| C | -2.92561600 | -2.32560400 | 0.12104400  |
| O | -2.62868800 | -3.44896600 | 0.48101500  |
| N | -4.10470600 | -1.72527900 | 0.46126000  |
| C | -5.01979900 | -2.41256100 | 1.35598400  |
| H | -4.59855800 | -3.38353400 | 1.60540100  |
| H | -5.99232600 | -2.55513100 | 0.87485000  |
| H | -5.16171000 | -1.83548600 | 2.27565900  |
| C | -4.46722500 | -0.37966900 | 0.04974400  |
| H | -3.92166000 | 0.39162500  | 0.60851500  |
| H | -5.53313600 | -0.24007400 | 0.23334700  |
| H | -4.29511600 | -0.22023000 | -1.01648800 |
| C | -1.99361400 | -1.49249800 | -0.76696200 |
| H | -2.09504700 | -0.43734700 | -0.51717800 |
| H | -2.34885900 | -1.60119700 | -1.79841200 |
| C | 0.17011600  | -1.63071200 | 0.51422600  |
| C | 1.51726400  | -2.03572400 | 0.67925500  |
| C | -0.37208200 | -0.79628400 | 1.53104000  |
| C | 2.25448400  | -1.67674100 | 1.80238800  |
| H | 1.97404400  | -2.68670900 | -0.05358900 |

|   |             |             |             |
|---|-------------|-------------|-------------|
| C | 0.37418400  | -0.42747100 | 2.62660300  |
| H | -1.39844600 | -0.45693600 | 1.46792000  |
| C | 1.69892500  | -0.85739700 | 2.76830800  |
| H | 3.28066900  | -2.01192600 | 1.89731400  |
| H | -0.07295600 | 0.20182800  | 3.38868800  |
| H | 2.28327000  | -0.55590400 | 3.62950300  |
| C | -0.55269700 | -1.91642900 | -0.68044000 |
| C | -0.17881900 | -3.04202600 | -1.60692900 |
| H | -0.48459300 | -2.81705700 | -2.63267600 |
| H | -0.72821100 | -3.93532600 | -1.28366800 |
| H | 0.88500500  | -3.25898100 | -1.63375700 |
| C | -1.83691400 | 3.23103000  | 0.00163600  |
| C | -0.57940400 | 3.02948700  | 0.55127300  |
| C | 0.31039600  | 2.07776100  | 0.03774000  |
| C | -0.11025100 | 1.30358400  | -1.05291500 |
| C | -1.36012400 | 1.53914800  | -1.62704800 |
| C | -2.23687200 | 2.48193600  | -1.12173100 |
| C | 1.95228100  | 0.18352600  | -1.06525500 |
| C | 2.45097000  | 0.99423500  | -0.00381600 |
| C | 2.86076100  | -0.76472600 | -1.69489700 |
| H | -0.28472500 | 3.62979900  | 1.40168900  |
| H | -1.63166300 | 0.95102800  | -2.49775800 |
| C | -2.76016600 | 4.25954200  | 0.59658200  |
| H | -3.70182300 | 3.80596000  | 0.92174500  |
| H | -3.01431200 | 5.03271500  | -0.13484100 |
| H | -2.30643500 | 4.74878400  | 1.45947500  |
| C | -3.58109400 | 2.70036400  | -1.76203100 |
| H | -3.68586100 | 3.72477900  | -2.13217400 |
| H | -4.39663200 | 2.53434900  | -1.05038200 |
| H | -3.72799700 | 2.02502700  | -2.60680200 |
| N | 1.58098100  | 1.90242800  | 0.56576300  |
| C | 2.01701900  | 2.70798100  | 1.69579400  |
| H | 1.34187500  | 2.55776600  | 2.54166200  |
| H | 2.03851300  | 3.76749400  | 1.42590400  |
| H | 3.01848200  | 2.38357300  | 1.96297900  |
| N | 3.66766400  | 0.93198500  | 0.46669700  |
| C | 4.55354100  | 0.02278600  | -0.05456700 |
| O | 5.67606600  | -0.14336600 | 0.37119500  |
| N | 4.12194600  | -0.75301600 | -1.14677000 |
| H | 4.79332800  | -1.40927900 | -1.51925000 |
| N | 0.70397500  | 0.29877900  | -1.58010800 |
| H | 0.17698800  | -0.66537900 | -1.60560800 |
| O | 2.53853300  | -1.52138600 | -2.59597300 |

### 3a

Electronic Energy: -597.482722

Thermal correction to Enthalpy: 0.285611

Thermal correction to Gibbs Free Energy: 0.226755

|   |             |             |             |
|---|-------------|-------------|-------------|
| C | -2.14609900 | -0.36033600 | -0.21807900 |
| O | -2.33832200 | -1.55638300 | -0.36288100 |
| N | -3.16891600 | 0.54634000  | -0.25386900 |
| C | -4.53699900 | 0.07141300  | -0.34590100 |
| H | -4.52447900 | -1.00694800 | -0.48470100 |
| H | -5.04523700 | 0.54006000  | -1.19435400 |
| H | -5.09047100 | 0.31040500  | 0.56935200  |
| C | -3.00122000 | 1.96871000  | -0.02629300 |
| H | -3.05487000 | 2.22488200  | 1.03946700  |
| H | -3.80194600 | 2.50173600  | -0.54337700 |
| H | -2.05569700 | 2.33068900  | -0.42719100 |
| C | -0.74259200 | 0.20273100  | -0.01946800 |
| H | -0.73832000 | 0.92175100  | 0.80686700  |
| H | -0.47631600 | 0.76939600  | -0.91943700 |
| C | 1.70361500  | -0.31362700 | 0.03581200  |
| C | 2.51102900  | -0.76397100 | -1.00717200 |
| C | 2.20845900  | 0.67862500  | 0.87923400  |
| C | 3.78542700  | -0.24260200 | -1.20557100 |
| H | 2.13647700  | -1.53590500 | -1.67243700 |
| C | 3.47924600  | 1.20430700  | 0.68514600  |
| H | 1.60380400  | 1.04485900  | 1.70327400  |
| C | 4.27401900  | 0.74472400  | -0.35982600 |
| H | 4.39676500  | -0.61047700 | -2.02236500 |
| H | 3.85221000  | 1.97339900  | 1.35284700  |
| H | 5.26703800  | 1.15275700  | -0.51107500 |
| C | 0.31187600  | -0.88268500 | 0.23306800  |
| C | 0.14480700  | -1.52025000 | 1.61646600  |
| H | -0.83644100 | -1.99036300 | 1.70011100  |
| H | 0.24265900  | -0.77344700 | 2.41141700  |
| H | 0.90847000  | -2.28387800 | 1.78175900  |
| H | 0.15593100  | -1.66445900 | -0.51453100 |

### FMN<sub>ox</sub>

Electronic Energy: -872.073647

Thermal correction to Enthalpy: 0.258414

Thermal correction to Gibbs Free Energy: 0.197996

|   |            |             |             |
|---|------------|-------------|-------------|
| C | 3.39001800 | -0.56629700 | 0.00001500  |
| C | 2.20320200 | -1.27879900 | 0.00000800  |
| C | 0.96666600 | -0.62049900 | 0.00000200  |
| C | 0.94704500 | 0.78466300  | -0.00000100 |

|   |             |             |             |
|---|-------------|-------------|-------------|
| C | 2.15803300  | 1.49429700  | 0.00000900  |
| C | 3.37490400  | 0.85120300  | 0.00001600  |
| C | -1.33224000 | 0.83176800  | -0.00003000 |
| C | -1.43223000 | -0.62711700 | -0.00002100 |
| C | -2.62174200 | 1.59828100  | 0.00000100  |
| H | 2.24455900  | -2.35988200 | 0.00000500  |
| H | 2.09194400  | 2.57664600  | 0.00000800  |
| C | 4.70074400  | -1.30246800 | 0.00002300  |
| H | 5.29672200  | -1.04020800 | -0.87914500 |
| H | 5.29669200  | -1.04023700 | 0.87922200  |
| H | 4.55223400  | -2.38286200 | 0.00000300  |
| C | 4.66083200  | 1.63210300  | 0.00002500  |
| H | 5.26768900  | 1.40016400  | 0.88044300  |
| H | 5.26769700  | 1.40017300  | -0.88038900 |
| H | 4.46468700  | 2.70484000  | 0.00003000  |
| N | -0.23835800 | -1.30273800 | 0.00000200  |
| C | -0.24764600 | -2.76367400 | 0.00001800  |
| H | 0.25697400  | -3.13617200 | -0.89337300 |
| H | 0.25700300  | -3.13615100 | 0.89340000  |
| H | -1.28342800 | -3.08927600 | 0.00003700  |
| N | -2.54215100 | -1.30056900 | -0.00003900 |
| C | -3.74864100 | -0.63364200 | -0.00013000 |
| O | -4.81617200 | -1.19516700 | 0.00001400  |
| N | -3.72300200 | 0.77650000  | 0.00008500  |
| H | -4.62822200 | 1.22691000  | 0.00009000  |
| N | -0.22686700 | 1.48826200  | -0.00001400 |
| O | -2.69452600 | 2.80103600  | -0.00003700 |

## 2I'

Electronic Energy: -475.562387

Thermal correction to Enthalpy: 0.127513

Thermal correction to Gibbs Free Energy: 0.085563

|   |             |             |             |
|---|-------------|-------------|-------------|
| C | 1.14762900  | -0.76327200 | 0.00018800  |
| C | -0.21405900 | -0.32321900 | 0.00007300  |
| C | -1.22141600 | -1.32163200 | -0.00001800 |
| C | -0.66416400 | 1.01867700  | 0.00009100  |
| C | -2.56886900 | -1.00931800 | -0.00007500 |
| H | -0.91721400 | -2.36501200 | -0.00005900 |
| C | -2.02027000 | 1.31758200  | 0.00002300  |
| H | 0.07848300  | 1.80328500  | 0.00013100  |
| C | -2.99196000 | 0.32051700  | -0.00005300 |
| H | -3.30126300 | -1.81250400 | -0.00014900 |
| H | -2.32339600 | 2.36159700  | 0.00003900  |
| H | -4.04831700 | 0.56906000  | -0.00009800 |

|   |            |             |             |
|---|------------|-------------|-------------|
| N | 2.25799400 | 0.01208700  | -0.00001500 |
| O | 2.17906000 | 1.26941900  | -0.00008700 |
| O | 3.38774900 | -0.55153400 | -0.00008100 |
| H | 1.36993400 | -1.82011600 | 0.00021400  |

## TS-1'

Electronic Energy: -762.730258

Thermal correction to Enthalpy: 0.255118

Thermal correction to Gibbs Free Energy: 0.192571

|   |             |             |             |
|---|-------------|-------------|-------------|
| C | -1.95836300 | -1.25419000 | -0.39622600 |
| O | -2.08855600 | -2.26823800 | 0.30520100  |
| N | -3.03781200 | -0.40286600 | -0.59536700 |
| C | -4.12298300 | -0.46462800 | 0.35938100  |
| H | -3.99185900 | 0.29601900  | 1.14153200  |
| H | -5.07944800 | -0.29191000 | -0.14824400 |
| H | -4.12906900 | -1.45053500 | 0.81943000  |
| C | -2.92041600 | 0.86452100  | -1.29108000 |
| H | -3.92436700 | 1.18364500  | -1.59020700 |
| H | -2.47489300 | 1.64590300  | -0.66434500 |
| H | -2.33019000 | 0.75383400  | -2.20094000 |
| C | -0.68613200 | -0.91599500 | -0.98685500 |
| H | 0.04350800  | -1.71390200 | -1.00184100 |
| H | -0.54195900 | -0.09390200 | -1.67356500 |
| C | 0.36743500  | 0.21609600  | 0.76423500  |
| C | 1.74716500  | 0.04866400  | 0.33906100  |
| C | 2.38360800  | -1.15023200 | 0.71731100  |
| C | 2.48640400  | 0.95258800  | -0.44339900 |
| C | 3.68870600  | -1.42866800 | 0.34761100  |
| H | 1.82646700  | -1.87247200 | 1.30649500  |
| C | 3.79849700  | 0.66781400  | -0.80414800 |
| H | 2.01234800  | 1.87339300  | -0.75099700 |
| C | 4.41399800  | -0.51720500 | -0.41732200 |
| H | 4.14450100  | -2.36409700 | 0.65804000  |
| H | 4.34627000  | 1.38851700  | -1.40448200 |
| H | 5.43722700  | -0.73110100 | -0.70848800 |
| N | -0.30540000 | 1.40928300  | 0.76936100  |
| O | 0.03900800  | 2.35023100  | 0.00769200  |
| O | -1.33848200 | 1.50376700  | 1.48232700  |
| H | -0.01931600 | -0.46698400 | 1.50648700  |

## Int-2'

Electronic Energy: -762.780306

Thermal correction to Enthalpy: 0.258910

Thermal correction to Gibbs Free Energy: 0.197134



|   |             |             |             |   |             |             |             |
|---|-------------|-------------|-------------|---|-------------|-------------|-------------|
| C | 2.04819900  | -1.08376500 | 0.14395900  | H | 3.39503200  | 1.85372400  | 0.37215700  |
| O | 2.15880300  | -2.18073500 | -0.39994500 | H | 2.02146500  | 1.22389300  | 1.25781300  |
| N | 3.12093700  | -0.25726400 | 0.29561800  | C | 0.79171100  | -0.89398200 | 0.52758900  |
| C | 4.41130000  | -0.69246900 | -0.19194100 | H | 0.46906600  | -1.90194100 | 0.81355700  |
| H | 4.71494800  | -0.09936500 | -1.06351400 | H | 0.80996900  | -0.28276300 | 1.43471600  |
| H | 5.16700400  | -0.56146400 | 0.59175000  | C | -0.19255800 | -0.29691800 | -0.44698400 |
| H | 4.35299700  | -1.74069400 | -0.47720400 | C | -1.60091800 | -0.41809900 | -0.19094400 |
| C | 3.09416500  | 1.08802900  | 0.84498700  | C | -2.12145900 | -0.70320300 | 1.08998600  |
| H | 3.64060800  | 1.11606600  | 1.79777700  | C | -2.53276900 | -0.14303500 | -1.21697800 |
| H | 3.59250400  | 1.76603500  | 0.14396400  | C | -3.48892500 | -0.74607300 | 1.31632100  |
| H | 2.07763200  | 1.46981400  | 0.97710000  | H | -1.44198400 | -0.88219100 | 1.91580000  |
| C | 0.69002200  | -0.65029600 | 0.66760800  | C | -3.89482600 | -0.18445900 | -0.98271300 |
| H | 0.20354900  | -1.57826800 | 0.97032500  | H | -2.15608700 | 0.12300600  | -2.19872900 |
| H | 0.73409100  | 0.02155400  | 1.52511500  | C | -4.39156300 | -0.49423500 | 0.28553400  |
| C | -0.16859400 | 0.03259300  | -0.41481100 | H | -3.85703800 | -0.97042400 | 2.31356100  |
| C | -1.65327500 | -0.16576900 | -0.13726700 | H | -4.58326600 | 0.03376500  | -1.79410600 |
| C | -2.46790700 | 0.87850900  | 0.29676300  | H | -5.46083100 | -0.52558600 | 0.46763400  |
| C | -2.22034500 | -1.42546000 | -0.33298000 | N | 0.12942000  | 1.66258100  | -0.24538500 |
| C | -3.82038400 | 0.65730500  | 0.53352000  | O | 0.04245200  | 2.03839200  | 0.94596200  |
| H | -2.01588200 | 1.85371600  | 0.44489100  | O | -0.40605100 | 2.31034800  | -1.15648600 |
| C | -3.57173700 | -1.64757100 | -0.09386300 | H | 0.09480800  | -0.33381800 | -1.49228300 |
| H | -1.59169600 | -2.24094500 | -0.68154000 |   |             |             |             |
| C | -4.37894000 | -0.60277600 | 0.34363900  |   |             |             |             |
| H | -4.44448700 | 1.48033900  | 0.86797900  |   |             |             |             |
| H | -3.99485800 | -2.63448700 | -0.25482100 |   |             |             |             |
| H | -5.43558000 | -0.76863900 | 0.52983400  |   |             |             |             |
| N | 0.19880300  | 1.45288200  | -0.55480400 |   |             |             |             |
| O | 0.21475000  | 2.14296100  | 0.56165500  |   |             |             |             |
| O | -0.13137500 | 1.99257900  | -1.67796700 |   |             |             |             |
| H | 0.04853600  | -0.42140500 | -1.38498600 |   |             |             |             |

### TS-2'

Electronic Energy: -762.754746

Thermal correction to Enthalpy: 0.255719

Thermal correction to Gibbs Free Energy: 0.192936

|   |            |             |             |
|---|------------|-------------|-------------|
| C | 2.16343100 | -1.09252000 | -0.09158200 |
| O | 2.36042400 | -2.04984800 | -0.83316700 |
| N | 3.16961300 | -0.21481000 | 0.20355100  |
| C | 4.47325800 | -0.42916900 | -0.38563200 |
| H | 4.68210600 | 0.32688000  | -1.15328200 |
| H | 5.24629600 | -0.35400500 | 0.38825000  |
| H | 4.50230400 | -1.41591800 | -0.84242000 |
| C | 3.04983600 | 1.00718900  | 0.97626600  |
| H | 3.67901700 | 0.94687800  | 1.87451800  |

### Int-3'

Electronic Energy: -557.517499

Thermal correction to Enthalpy: 0.242257

Thermal correction to Gibbs Free Energy: 0.186215

|   |             |             |             |
|---|-------------|-------------|-------------|
| C | -2.32219000 | -0.60428400 | -0.33299800 |
| O | -3.14752100 | -1.49980100 | -0.27905100 |
| N | -2.52353600 | 0.61634200  | 0.24331400  |
| C | -3.80809000 | 0.90747300  | 0.85230300  |
| H | -3.67020200 | 1.23046800  | 1.88887600  |
| H | -4.32124400 | 1.70488800  | 0.30299500  |
| H | -4.41910800 | 0.00826100  | 0.83216400  |
| C | -1.60222000 | 1.73303400  | 0.14633500  |
| H | -1.82978400 | 2.37399800  | -0.71481900 |
| H | -1.68957000 | 2.33821500  | 1.05157600  |
| H | -0.56917000 | 1.39825100  | 0.08169600  |
| C | -0.98286400 | -0.83648500 | -1.03807100 |
| H | -1.15315400 | -1.71397900 | -1.66927800 |
| H | -0.73697500 | -0.00146900 | -1.69657400 |
| C | 0.10328600  | -1.12018200 | -0.05182400 |
| C | 1.39112300  | -0.54281100 | -0.02469000 |
| C | 1.84956000  | 0.40014900  | -0.98168100 |
| C | 2.29621500  | -0.90535400 | 1.00909200  |

|   |             |             |             |
|---|-------------|-------------|-------------|
| C | 3.11891000  | 0.94204900  | -0.89788700 |
| H | 1.20451200  | 0.69864900  | -1.80002800 |
| C | 3.56108200  | -0.35847400 | 1.08183300  |
| H | 1.97437500  | -1.62743100 | 1.75245000  |
| C | 3.98493500  | 0.57220700  | 0.13075000  |
| H | 3.44367700  | 1.65893600  | -1.64407000 |
| H | 4.22871200  | -0.65458400 | 1.88339800  |
| H | 4.97861400  | 1.00059200  | 0.18927200  |
| H | -0.13424800 | -1.85471100 | 0.71257500  |

**TS-3'**

Electronic Energy: -1430.198859

Thermal correction to Enthalpy: 0.512782

Thermal correction to Gibbs Free Energy: 0.419880

|   |             |             |             |
|---|-------------|-------------|-------------|
| C | 3.18614400  | -2.29184900 | 0.08254500  |
| O | 2.84022400  | -3.28845800 | 0.68434200  |
| N | 4.48019800  | -1.84575000 | 0.06926600  |
| C | 5.46608300  | -2.51782400 | 0.89735900  |
| H | 5.02993300  | -3.43586900 | 1.28373300  |
| H | 6.35371700  | -2.75880700 | 0.30540100  |
| H | 5.76538300  | -1.88366600 | 1.73973900  |
| C | 4.88911600  | -0.59418400 | -0.54026400 |
| H | 4.65788200  | 0.27321600  | 0.09195000  |
| H | 5.96868700  | -0.62050600 | -0.69655400 |
| H | 4.42255000  | -0.44889100 | -1.51511300 |
| C | 2.19172500  | -1.45336600 | -0.73366700 |
| H | 2.33838200  | -0.39828200 | -0.48681600 |
| H | 2.45366800  | -1.56188200 | -1.79231300 |
| C | 0.04758500  | -1.52910200 | 0.64717300  |
| C | -1.25434400 | -2.06146400 | 0.82911400  |
| C | 0.49487700  | -0.56352100 | 1.59190800  |
| C | -2.04483000 | -1.68689400 | 1.90921500  |
| H | -1.59828300 | -2.83138000 | 0.14815100  |
| C | -0.30756400 | -0.18476900 | 2.64274400  |
| H | 1.48410600  | -0.13113100 | 1.49688900  |
| C | -1.58802000 | -0.73336400 | 2.80282400  |
| H | -3.03145600 | -2.11866800 | 2.02953100  |
| H | 0.05477300  | 0.55010900  | 3.35376200  |
| H | -2.21316200 | -0.42193400 | 3.63157100  |
| C | 0.76813200  | -1.85286400 | -0.51904200 |
| C | 1.32470600  | 3.41689400  | 0.09228500  |
| C | 0.04192700  | 3.09178200  | 0.50571800  |
| C | -0.66102300 | 2.01080000  | -0.03937900 |
| C | -0.02951400 | 1.24945300  | -1.03277000 |

|   |             |             |             |
|---|-------------|-------------|-------------|
| C | 1.24753600  | 1.60200400  | -1.47122300 |
| C | 1.94452500  | 2.66234100  | -0.92355200 |
| C | -1.90798000 | -0.14816200 | -1.15723600 |
| C | -2.61906200 | 0.63191700  | -0.19912600 |
| C | -2.57087000 | -1.29749700 | -1.75259700 |
| H | -0.41964000 | 3.69163000  | 1.27860300  |
| H | 1.68567700  | 1.01640800  | -2.27267900 |
| C | 2.04357500  | 4.57995800  | 0.71998900  |
| H | 2.98262800  | 4.26150000  | 1.18310000  |
| H | 2.29664500  | 5.33773200  | -0.02777800 |
| H | 1.43326800  | 5.05610100  | 1.48846100  |
| C | 3.32859800  | 3.00042900  | -1.40761200 |
| H | 3.37360100  | 4.01480100  | -1.81543300 |
| H | 4.05975400  | 2.95101700  | -0.59421400 |
| H | 3.64919700  | 2.31163100  | -2.19114500 |
| N | -1.94807800 | 1.69178300  | 0.37319100  |
| C | -2.61090800 | 2.50223600  | 1.38491300  |
| H | -2.02334400 | 2.50307900  | 2.30536800  |
| H | -2.73868000 | 3.52767000  | 1.02750500  |
| H | -3.58489700 | 2.06010700  | 1.57313100  |
| N | -3.84976200 | 0.40030500  | 0.16828300  |
| C | -4.52508500 | -0.67779500 | -0.35003700 |
| O | -5.65073200 | -0.98445300 | -0.02499400 |
| N | -3.85943500 | -1.46861000 | -1.30876900 |
| H | -4.37391800 | -2.26141100 | -1.66516400 |
| N | -0.66388400 | 0.14252300  | -1.59098200 |
| H | -0.02828100 | -0.73973600 | -1.62282300 |
| O | -2.02036300 | -2.05463100 | -2.53560800 |
| H | 0.40351900  | -2.69521700 | -1.09939800 |

**18**

Electronic Energy: -558.169844

Thermal correction to Enthalpy: 0.255988

Thermal correction to Gibbs Free Energy: 0.199523

|   |             |             |             |
|---|-------------|-------------|-------------|
| C | -2.14939200 | -0.47720300 | -0.01520400 |
| O | -2.37320200 | -1.66394400 | -0.18340400 |
| N | -3.15682000 | 0.43722100  | 0.13401600  |
| C | -4.53206800 | 0.00478100  | -0.03072800 |
| H | -4.56122600 | -1.08203000 | -0.03883700 |
| H | -5.14327300 | 0.38057000  | 0.79513600  |
| H | -4.94889100 | 0.37974700  | -0.97316200 |
| C | -2.95124500 | 1.87108200  | 0.18400800  |
| H | -2.99971000 | 2.32493800  | -0.81436000 |
| H | -3.73506000 | 2.31999500  | 0.79891800  |

|   |             |             |             |
|---|-------------|-------------|-------------|
| H | -1.99382000 | 2.12354200  | 0.63501500  |
| C | -0.72259500 | 0.05237500  | 0.05276800  |
| H | -0.58357600 | 0.83391800  | -0.70250400 |
| H | -0.55830900 | 0.53567400  | 1.02250200  |
| C | 1.71646800  | -0.49884200 | -0.07699600 |
| C | 2.38977100  | -0.41791000 | 1.14193200  |
| C | 2.35343200  | -0.01377900 | -1.21927800 |
| C | 3.66322100  | 0.13370300  | 1.21972400  |
| H | 1.91183200  | -0.79885900 | 2.03981400  |
| C | 3.62670500  | 0.53897100  | -1.14763900 |
| H | 1.84673400  | -0.07702000 | -2.17794100 |
| C | 4.28586000  | 0.61553600  | 0.07396100  |
| H | 4.17247700  | 0.18262200  | 2.17602200  |
| H | 4.10725900  | 0.90567500  | -2.04810500 |
| H | 5.28061400  | 1.04279500  | 0.13179300  |
| C | 0.31541200  | -1.05230200 | -0.15018200 |
| H | 0.16980800  | -1.82594500 | 0.60671100  |
| H | 0.14508100  | -1.53308600 | -1.11607900 |

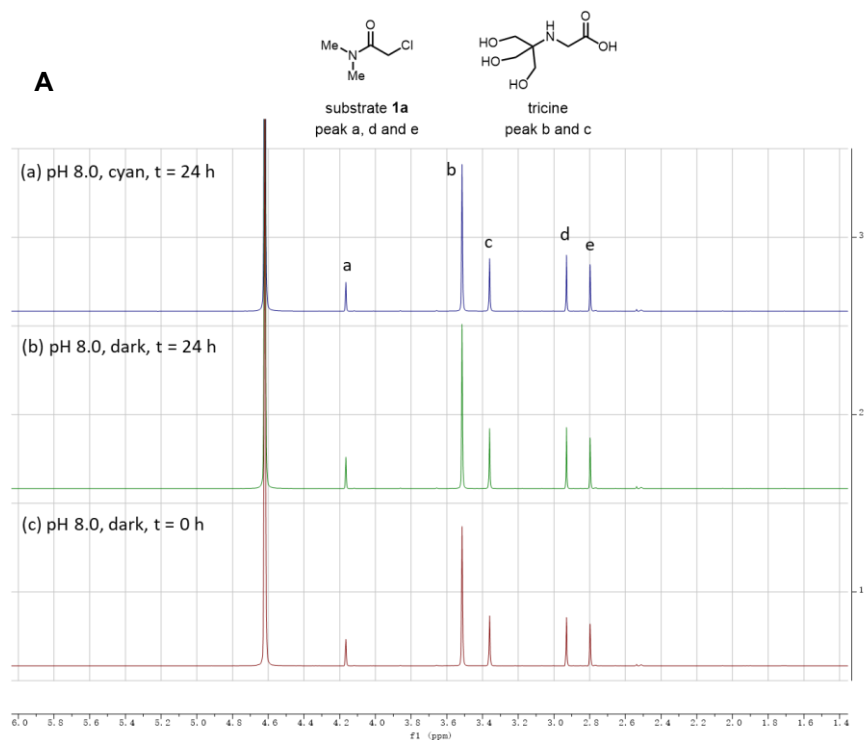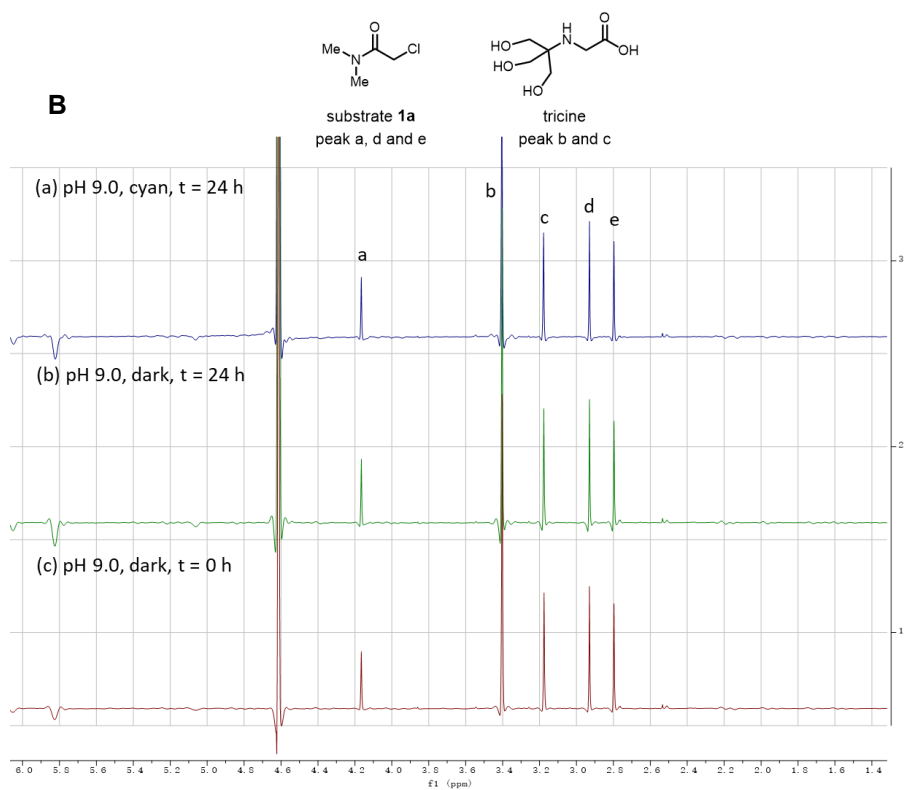

**Supplementary Fig. 14.** Stability of the model substrate **1a**. (A)  $^1\text{H}$  NMR (water suppression, 500 MHz) comparison of substrate **1a** in pH 8.0 tricine buffer (100 mM). (B)  $^1\text{H}$  NMR comparison of substrate **1a** in pH 9.0 tricine buffer (100 mM). (a) Cyan light irradiation, t = 24 h. (b) Dark condition, t = 24 h. (c) Dark condition, t = 0 h. **Note:** Higher pH (9.0) value does not affect model substrate's stability.

**Supplementary Table 6.** Reduction potential of CsER (FMN<sub>hq</sub>/FMN<sub>ox</sub>) at different pH value.

| Entry | pH  | $E^{red}$ (mV vs SCE) |
|-------|-----|-----------------------|
| 1     | 7.0 | -504 ± 2              |
| 2     | 8.0 | -516 ± 2              |
| 3     | 9.0 | -524 ± 2              |

**Note:** pH value has minor effect on the reduction potential of CsER, indicating pH value has minor effect on flavin electron transfer rate.

Procedure was adapted from a literature example.<sup>40,41</sup> Prepare stock solutions of 20  $\mu$ M benzyl viologen dichloride (communicator dye), 150  $\mu$ M of phenosaphranin (reference dye), and 150  $\mu$ M of CsER in 100 mM tricine buffer (pH 7.0, 8.0 and 9.0). Prepare 1.0 mM of xanthine in 0.1 mM NaOH. Mix 200  $\mu$ L of benzyl viologen stock, 200  $\mu$ L of phenosaphranin stock, 200  $\mu$ L of CsER stock, 200  $\mu$ L of xanthine, and 1.2 mL of tricine buffer in the bulb portion of a freeze-pump-thaw cuvette and degas. Import into an anaerobic chamber (MBraun® glovebox with O<sub>2</sub> level less than 1 ppm) and transfer the CsER solution into the cuvette portion of the freeze-pump-thaw cuvette. In anaerobic chamber, prepare 200 nM of xanthine oxidase and place 200  $\mu$ L of xanthine oxidase stock in the bulb portion of the freeze-pump-thaw cuvette, ensuring that the CsER solution and xanthine oxidase solution do not mix. The cuvette was sealed and removed from the anaerobic chamber. The cuvette was brought to the UV-Vis spectrophotometer, and the two solutions were mixed and spectra were taken from 250–650 nm every 30 seconds for 2 hours. Calculation of reduction potential of CsER was adapted from literature example.<sup>41</sup>

### 3. NMR spectra

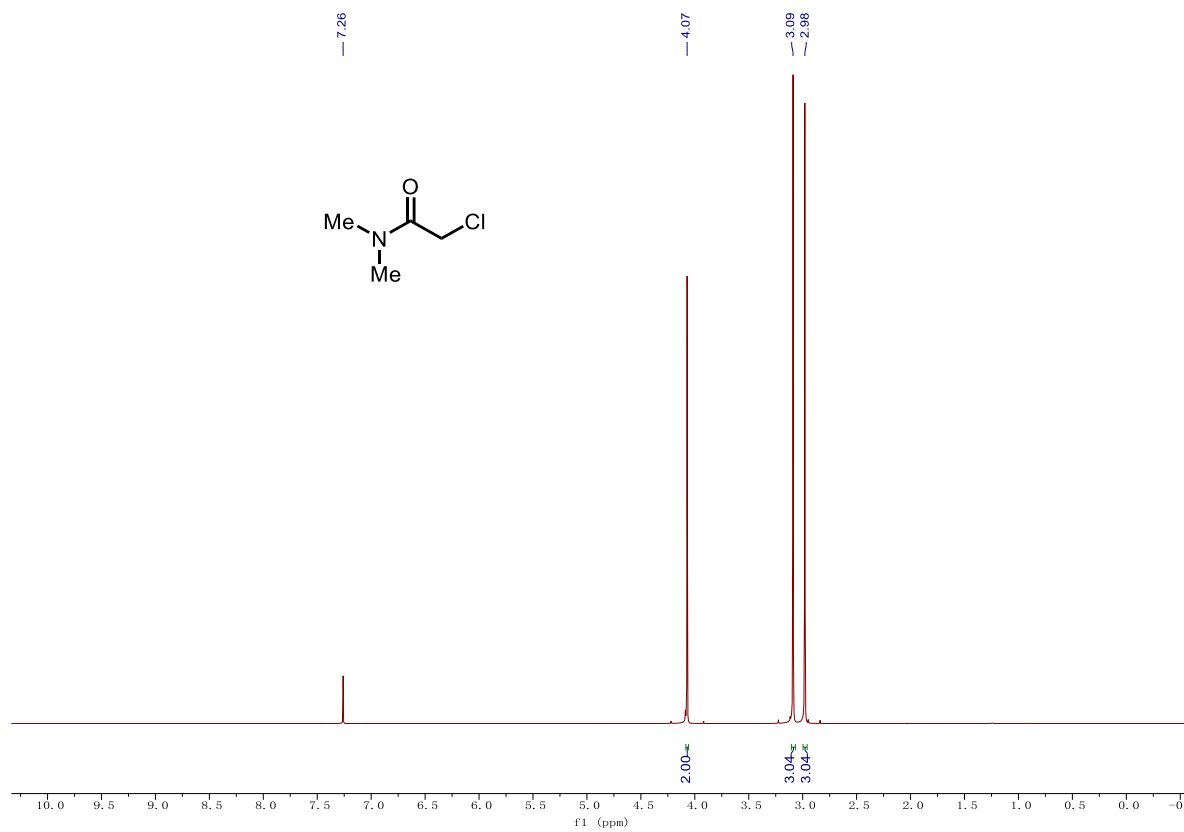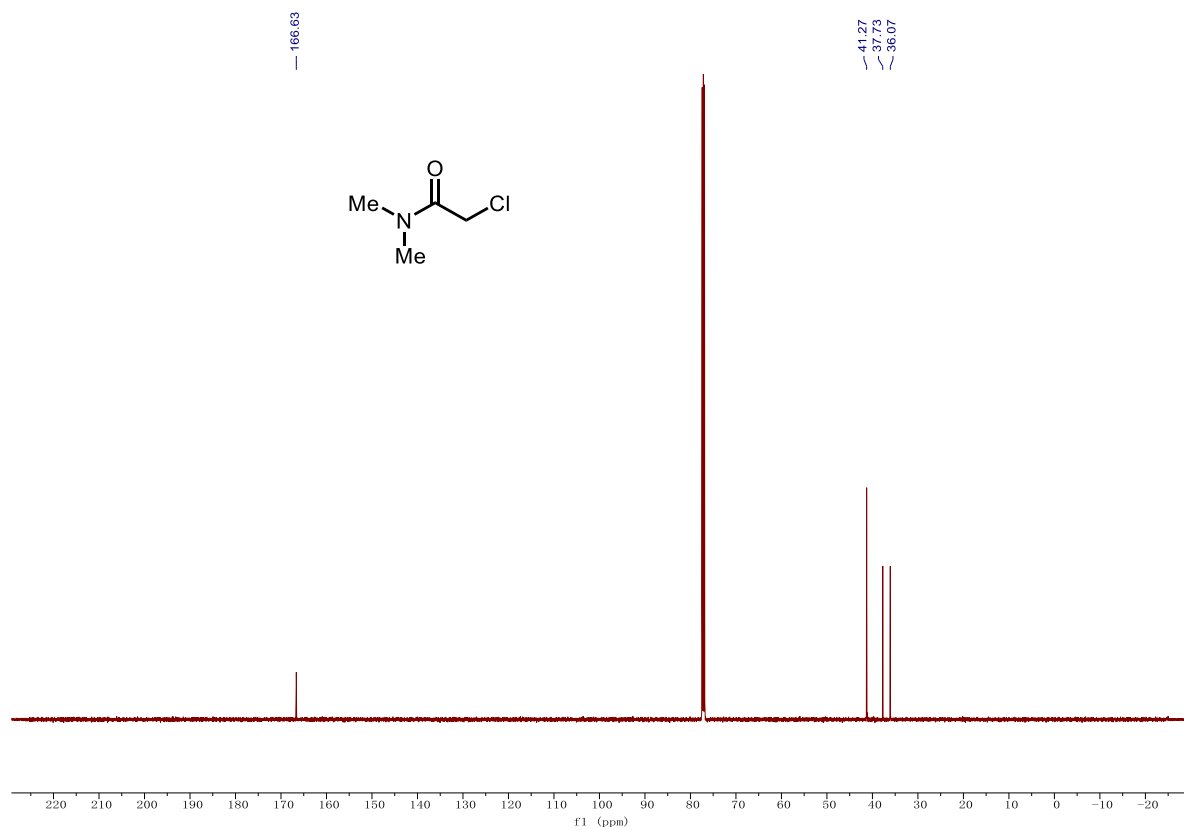

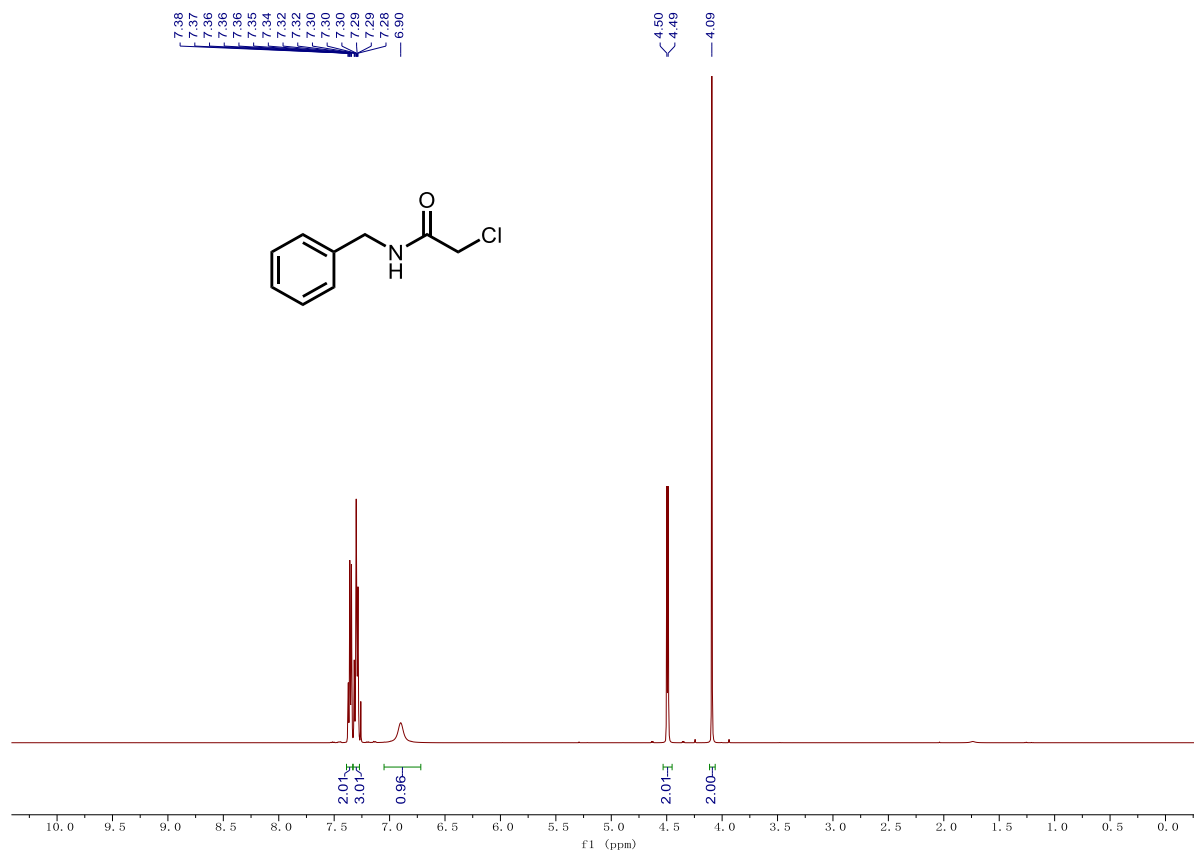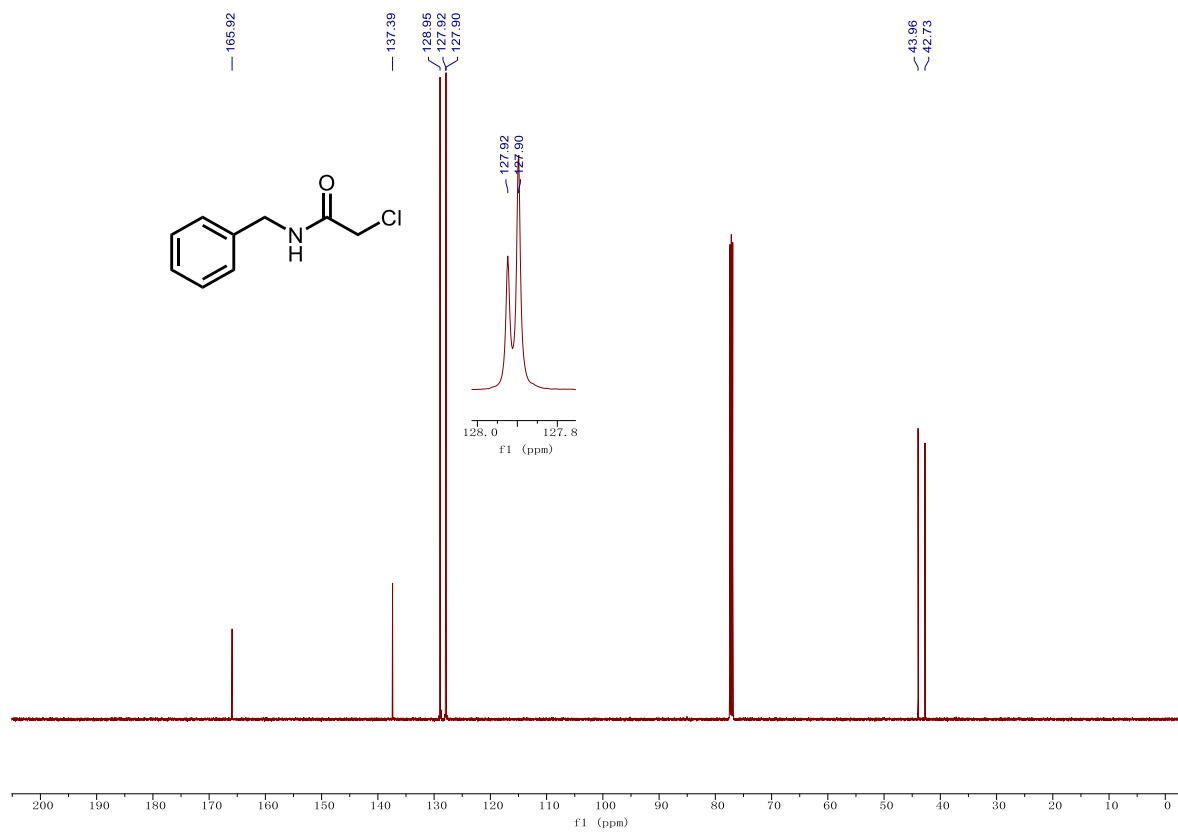

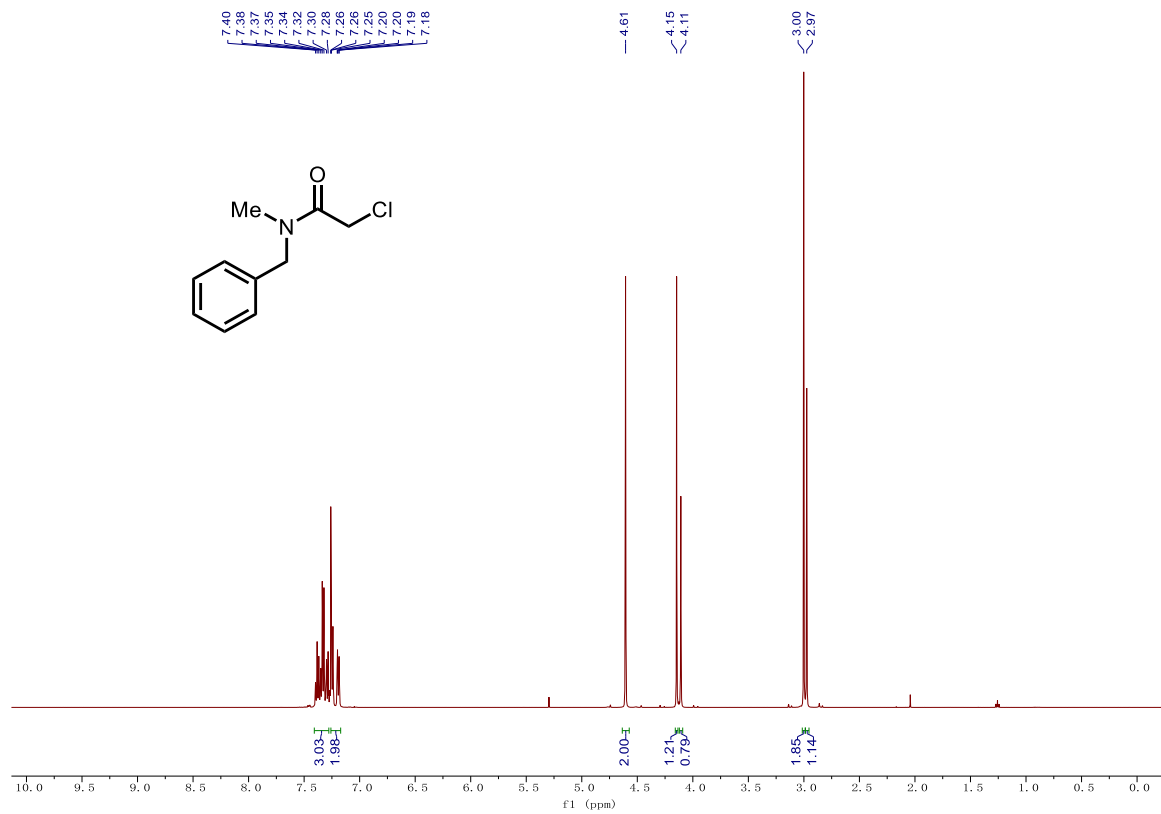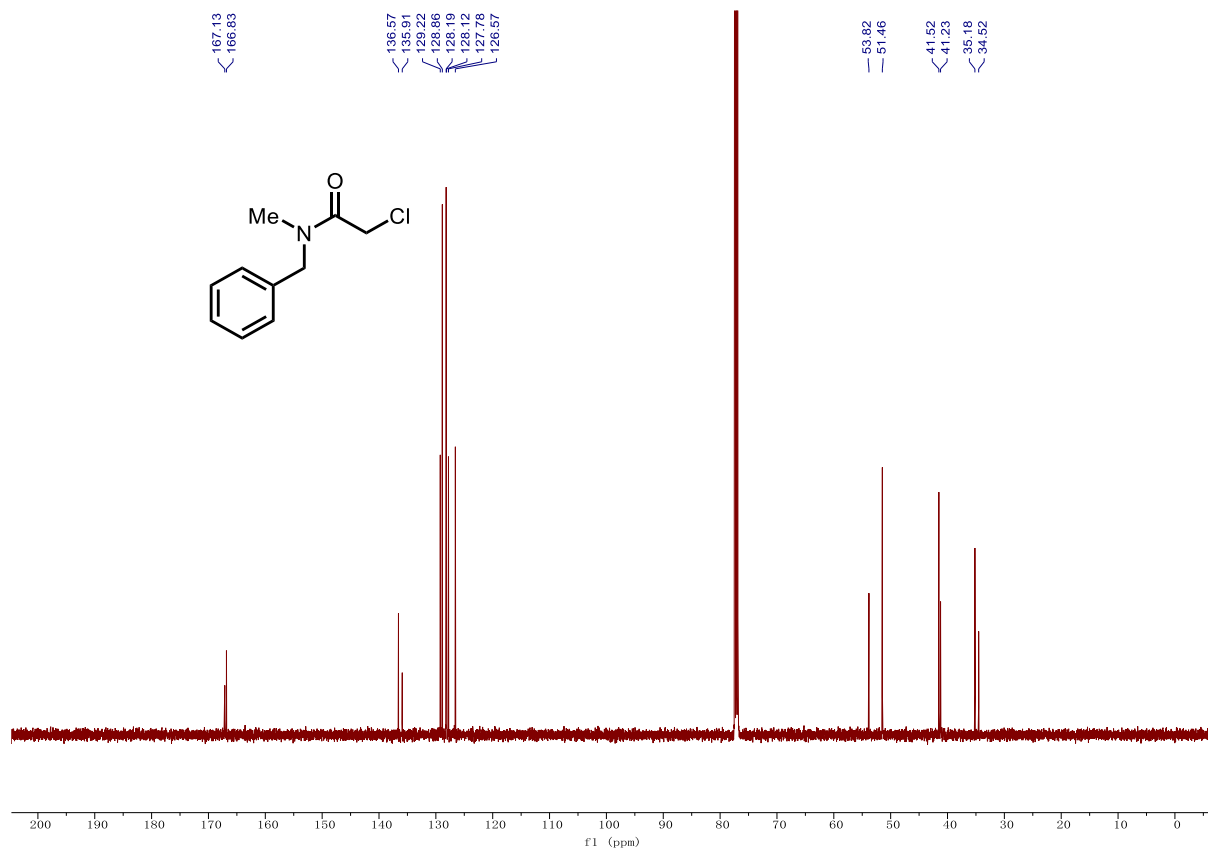



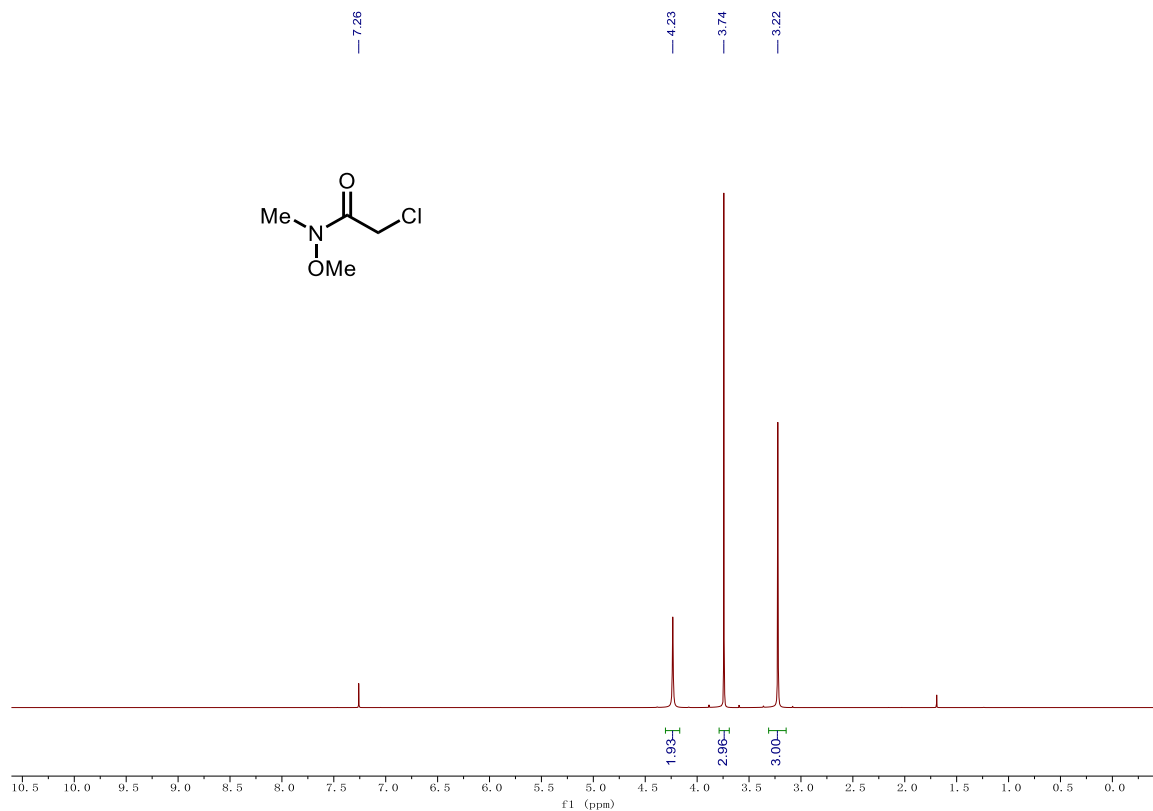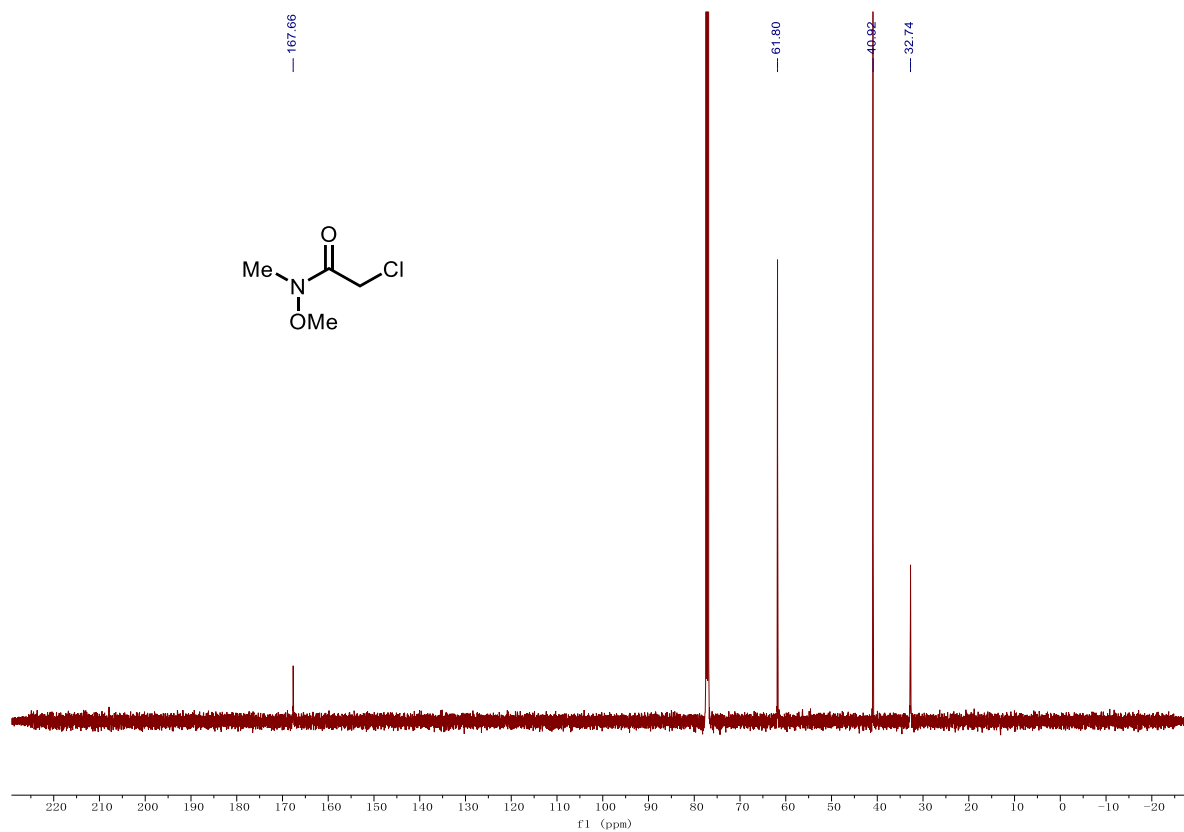

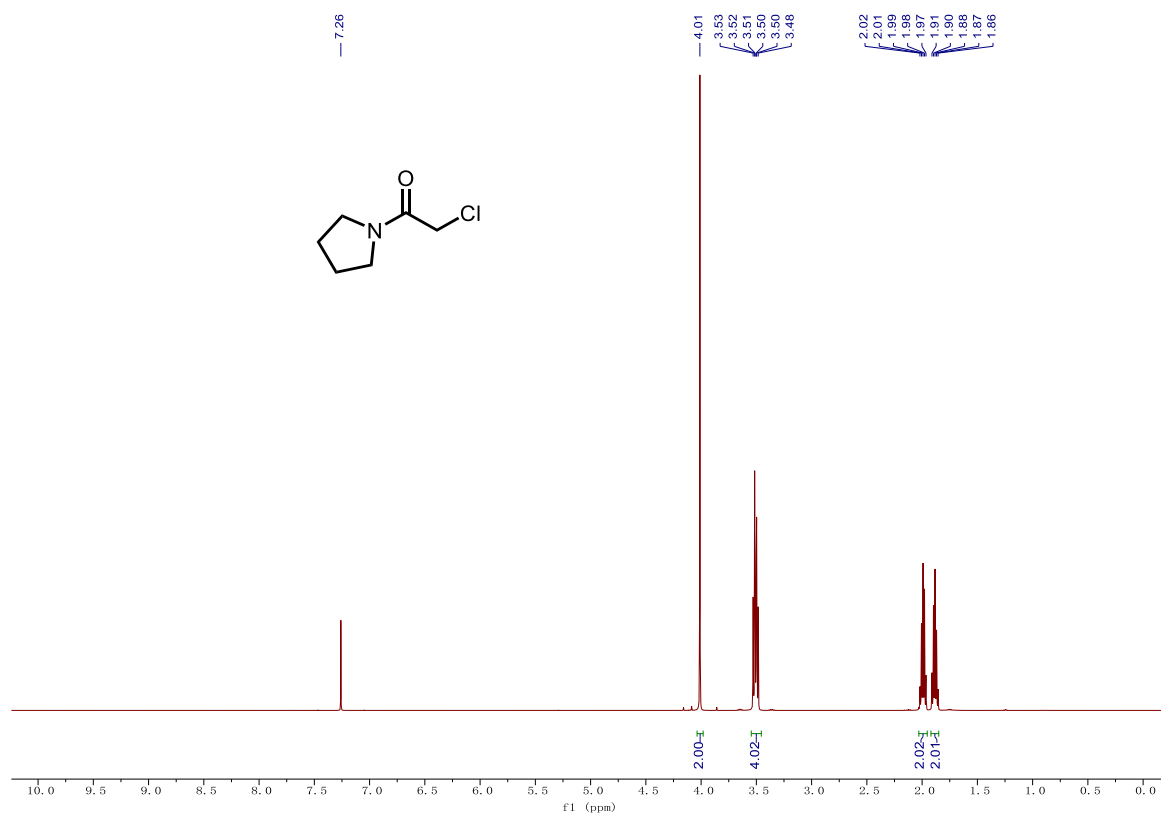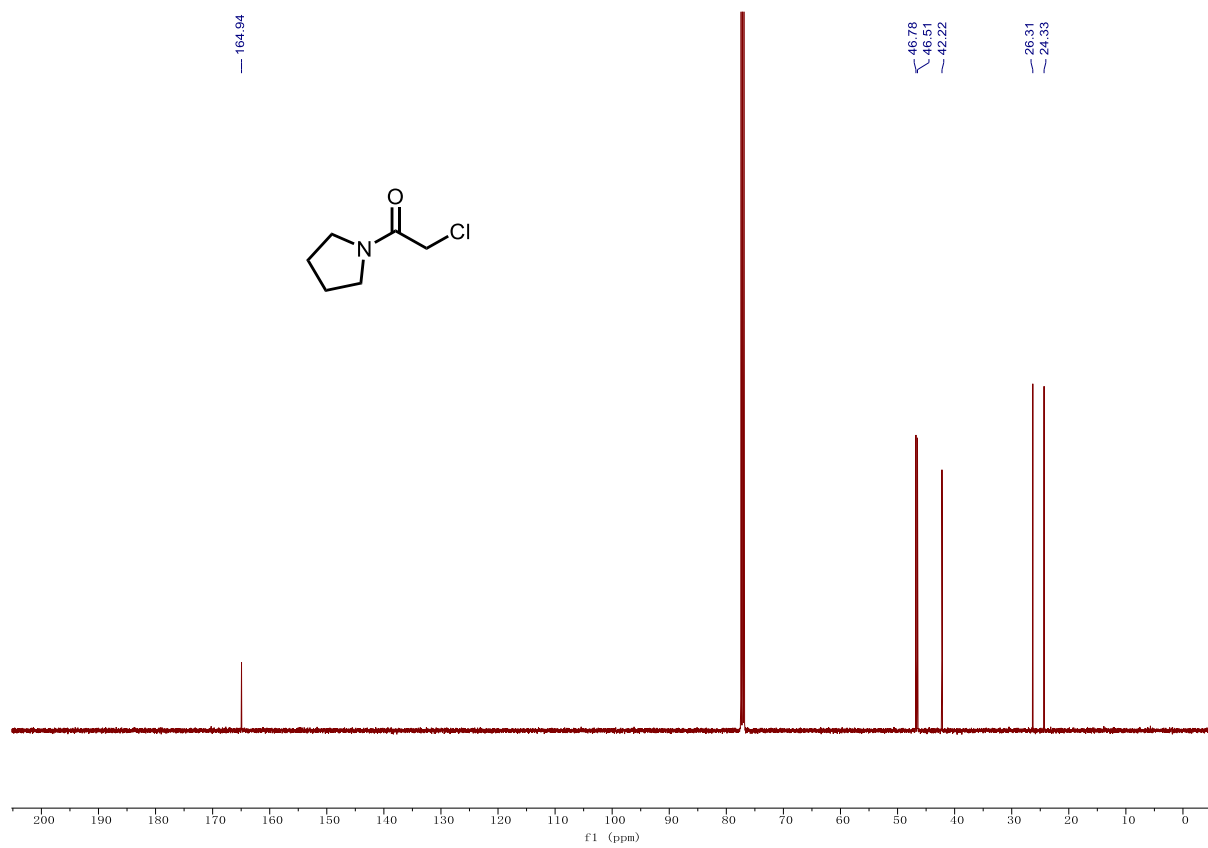

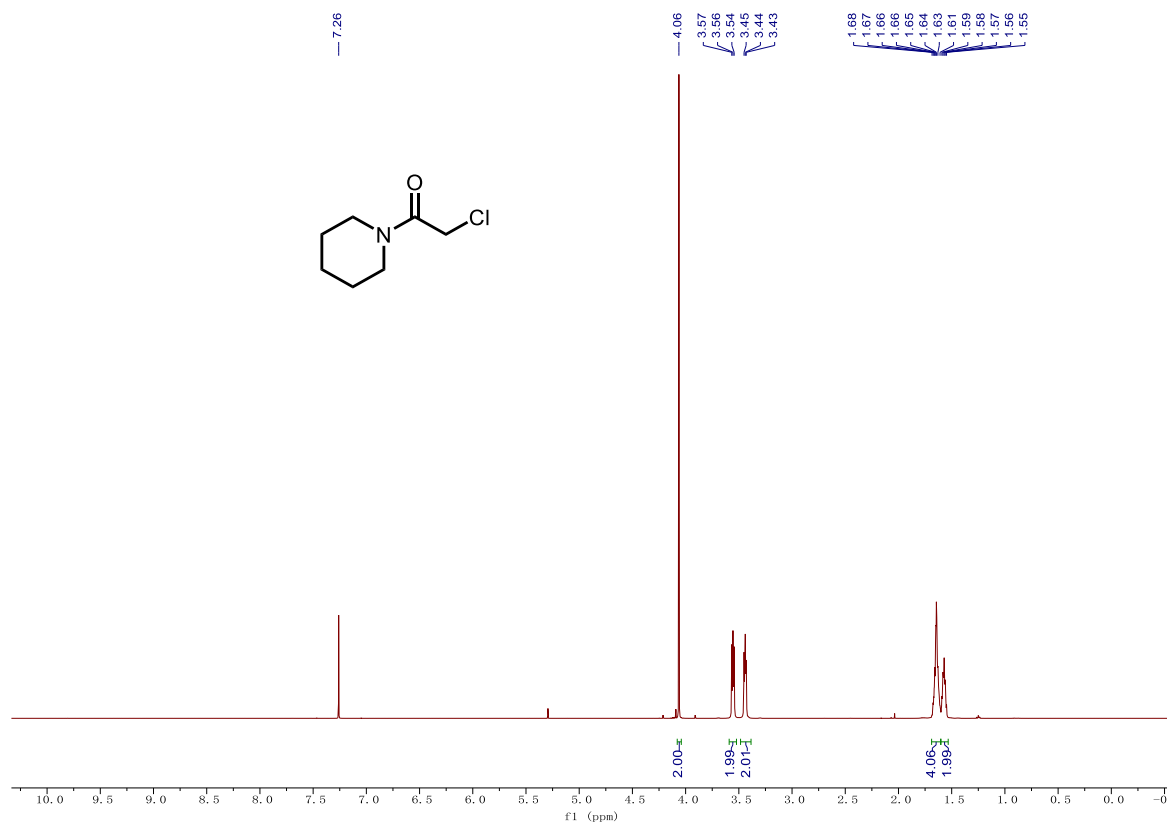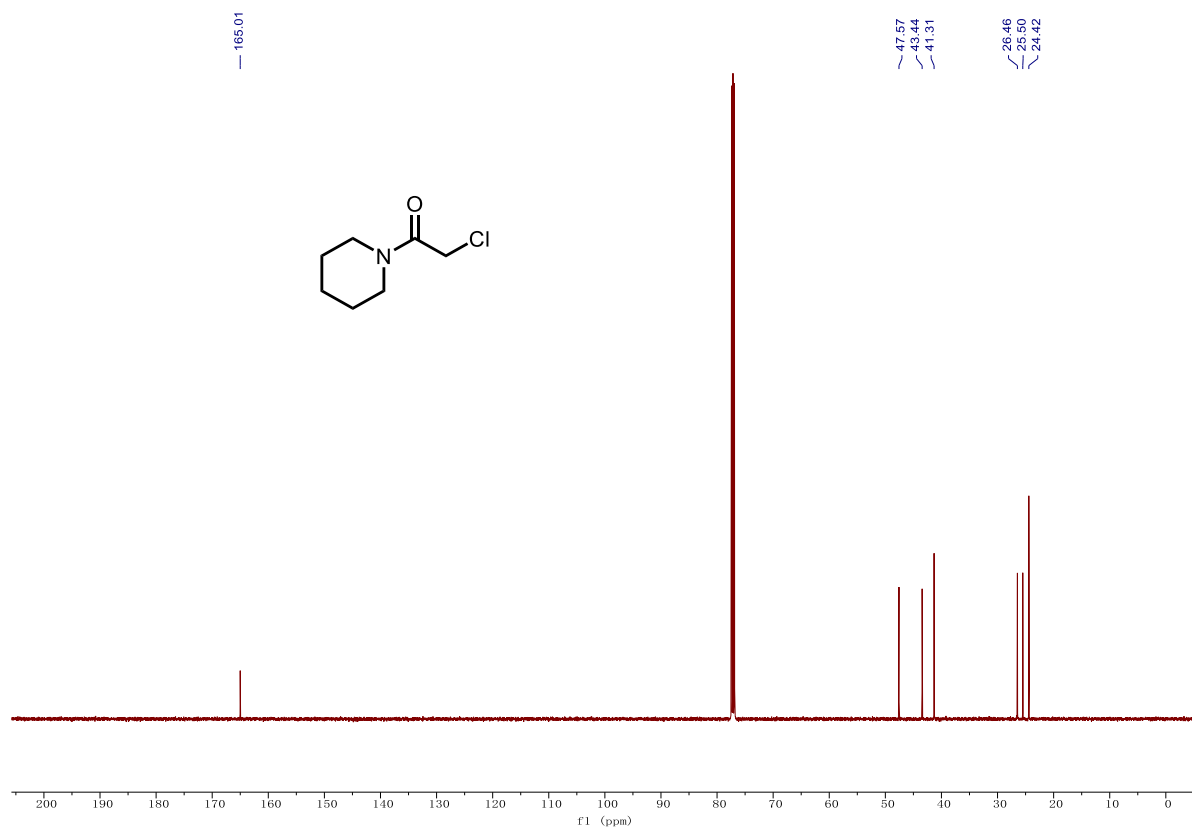

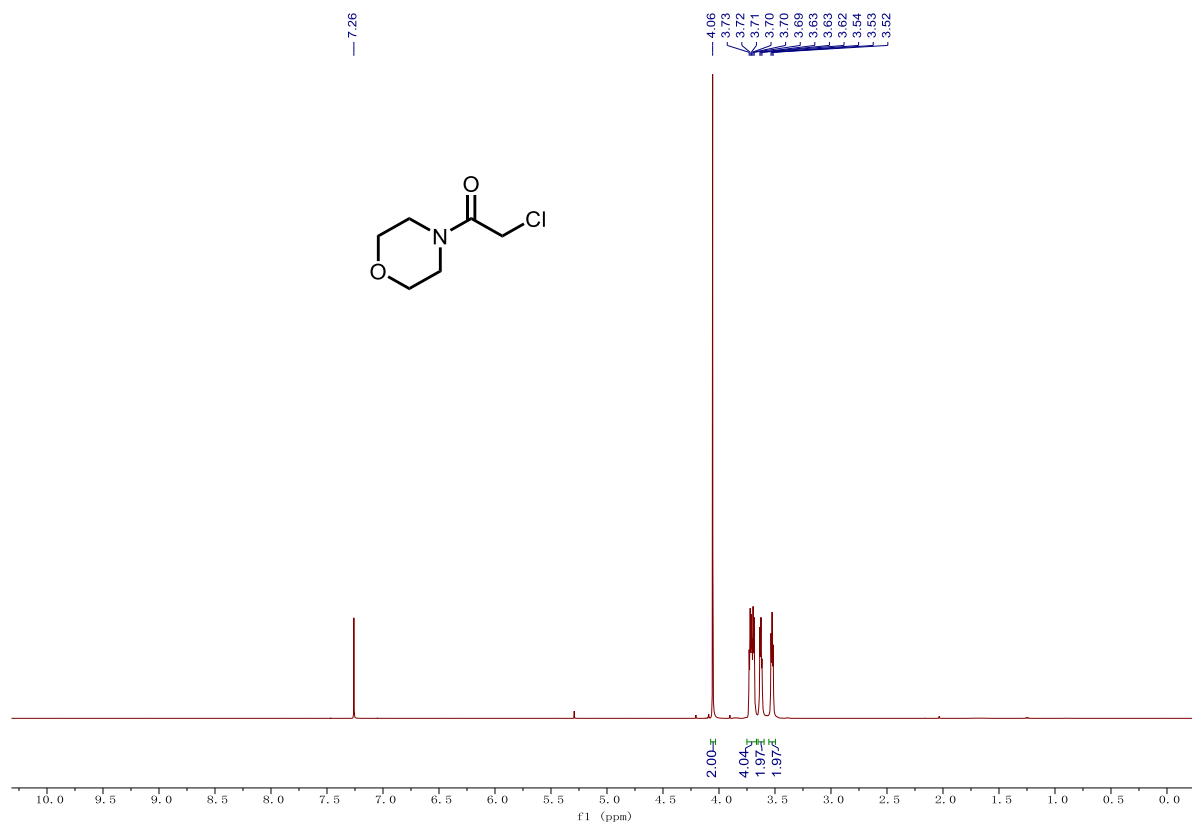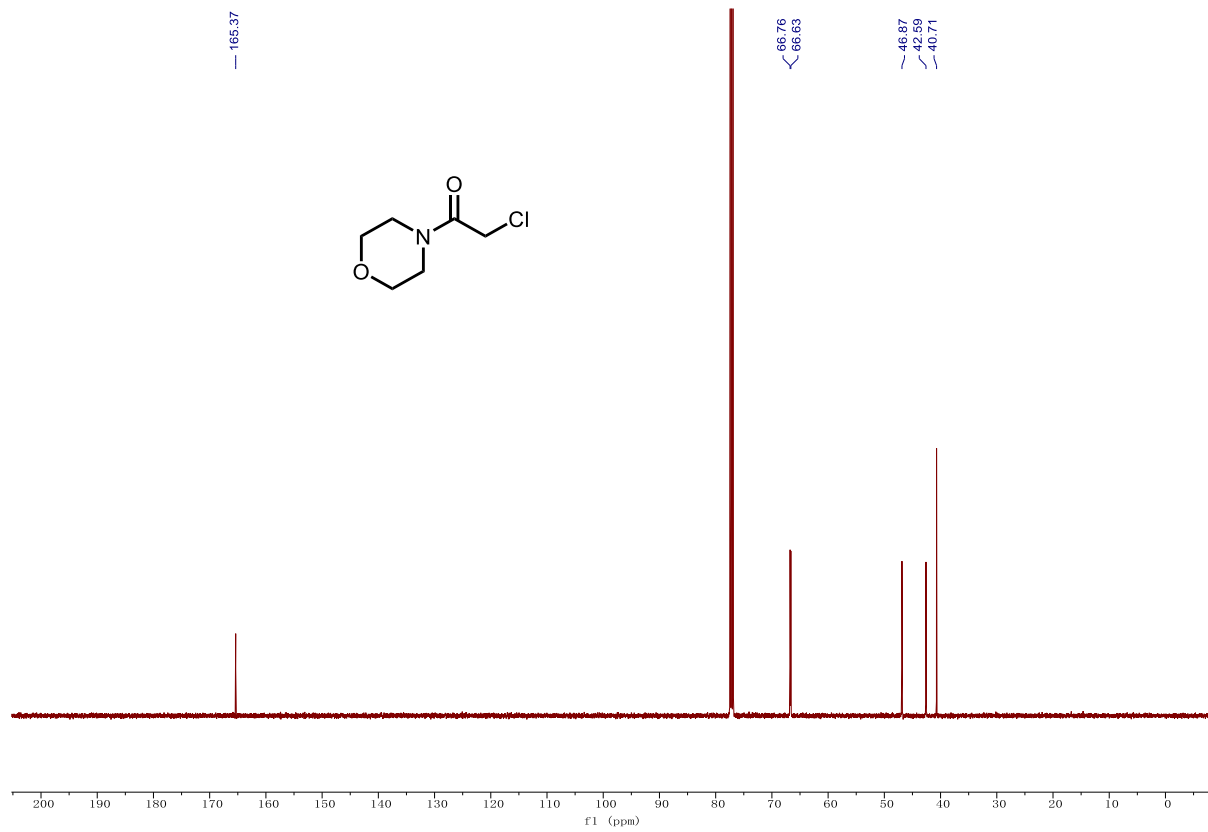

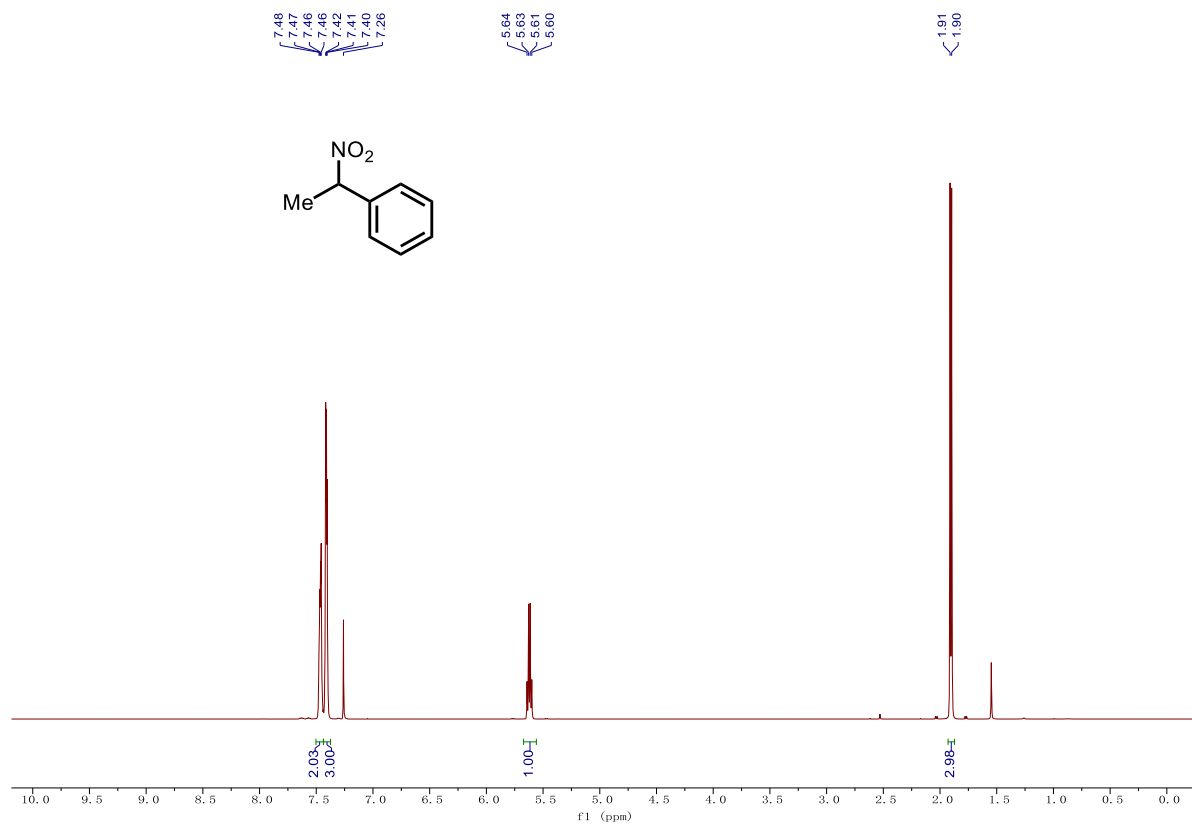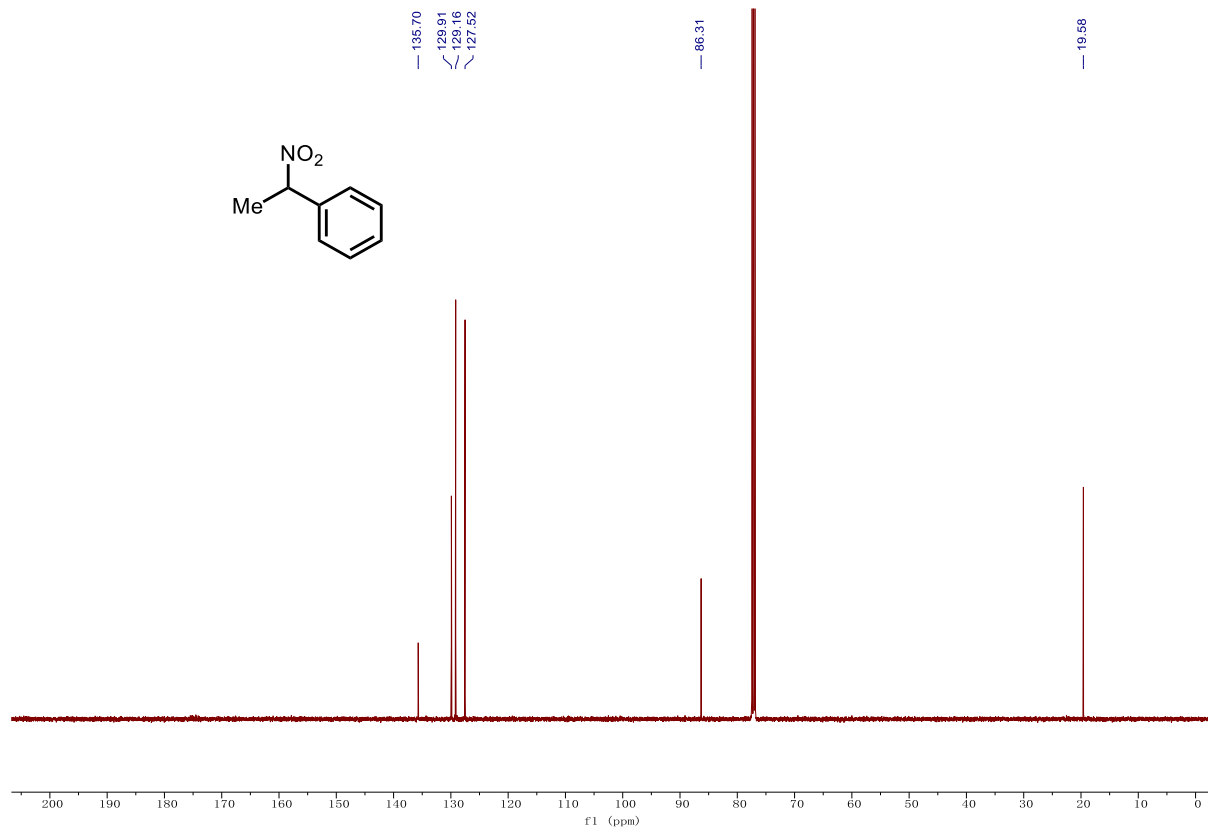

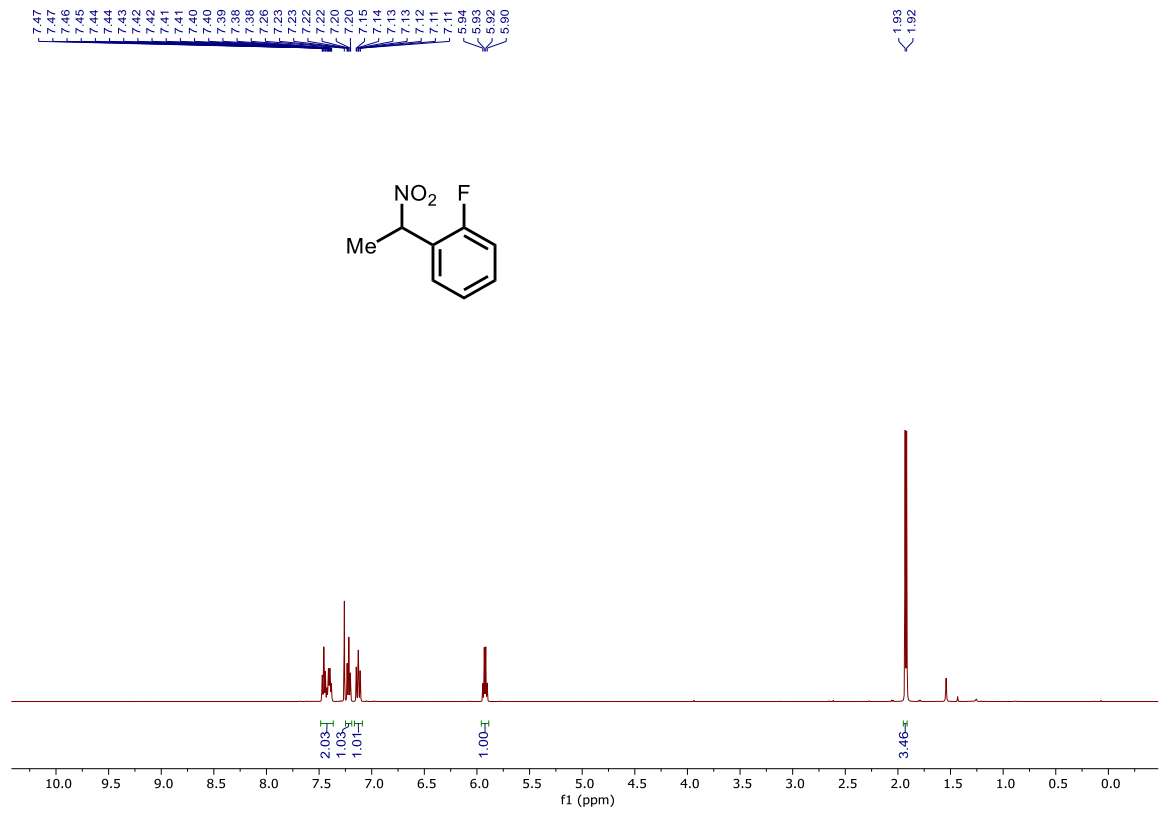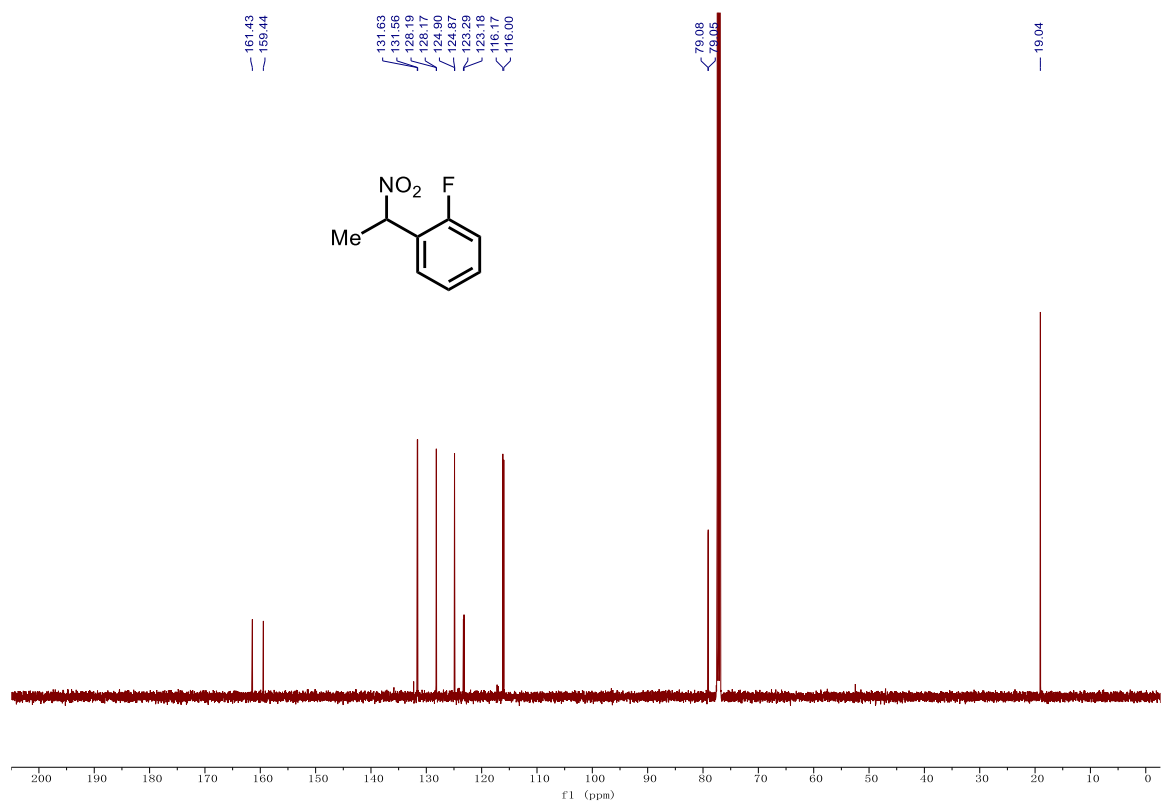

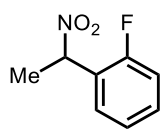

---117.27

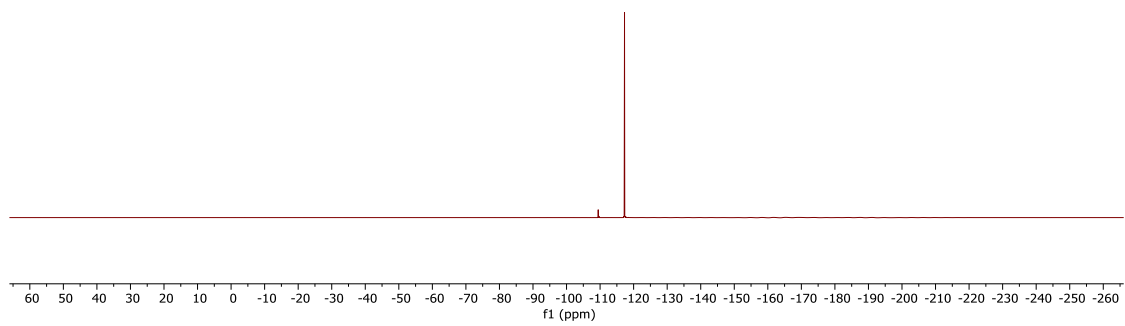

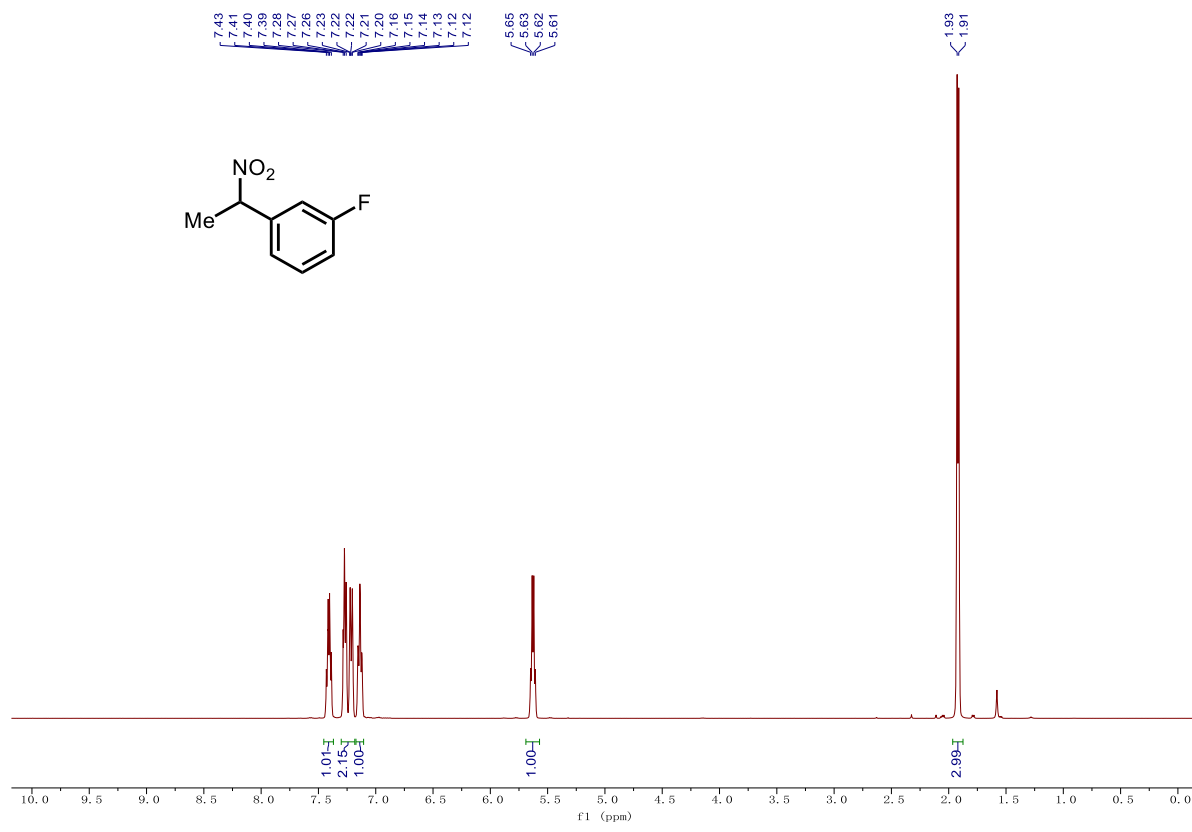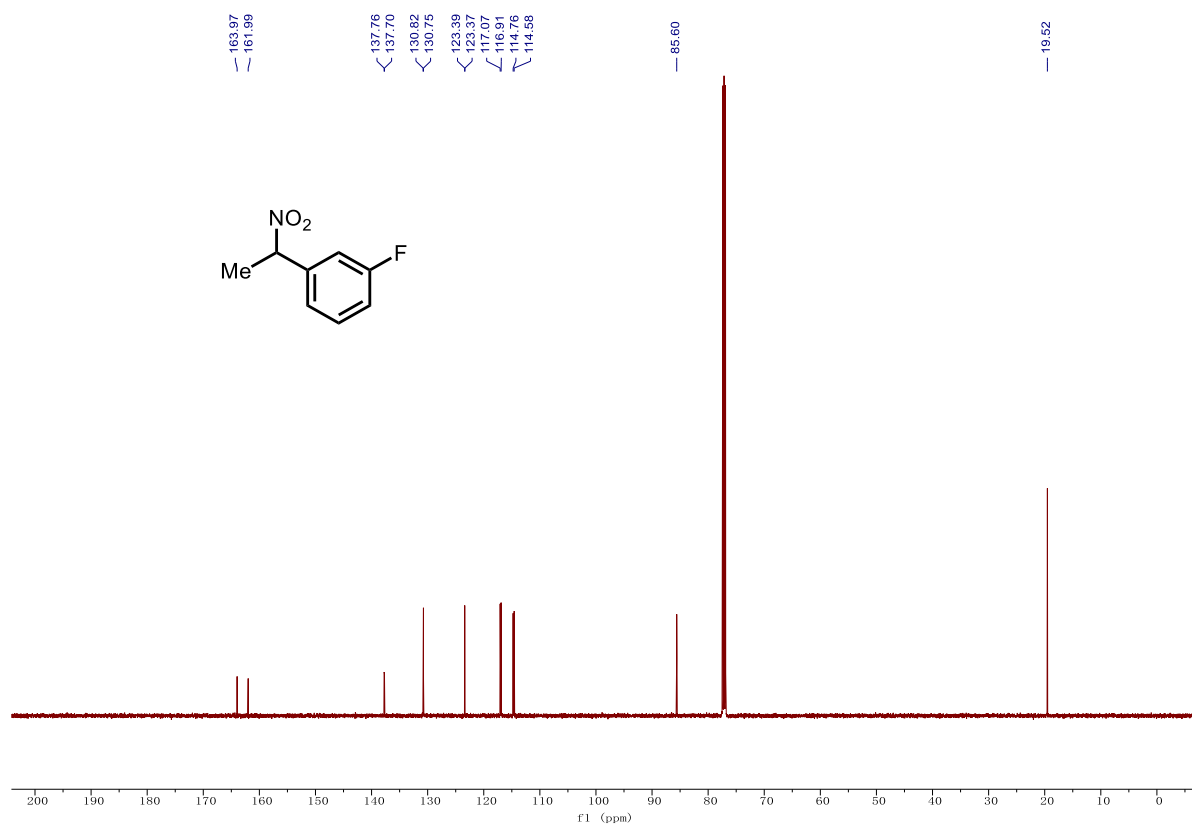



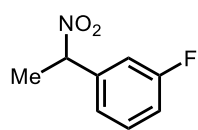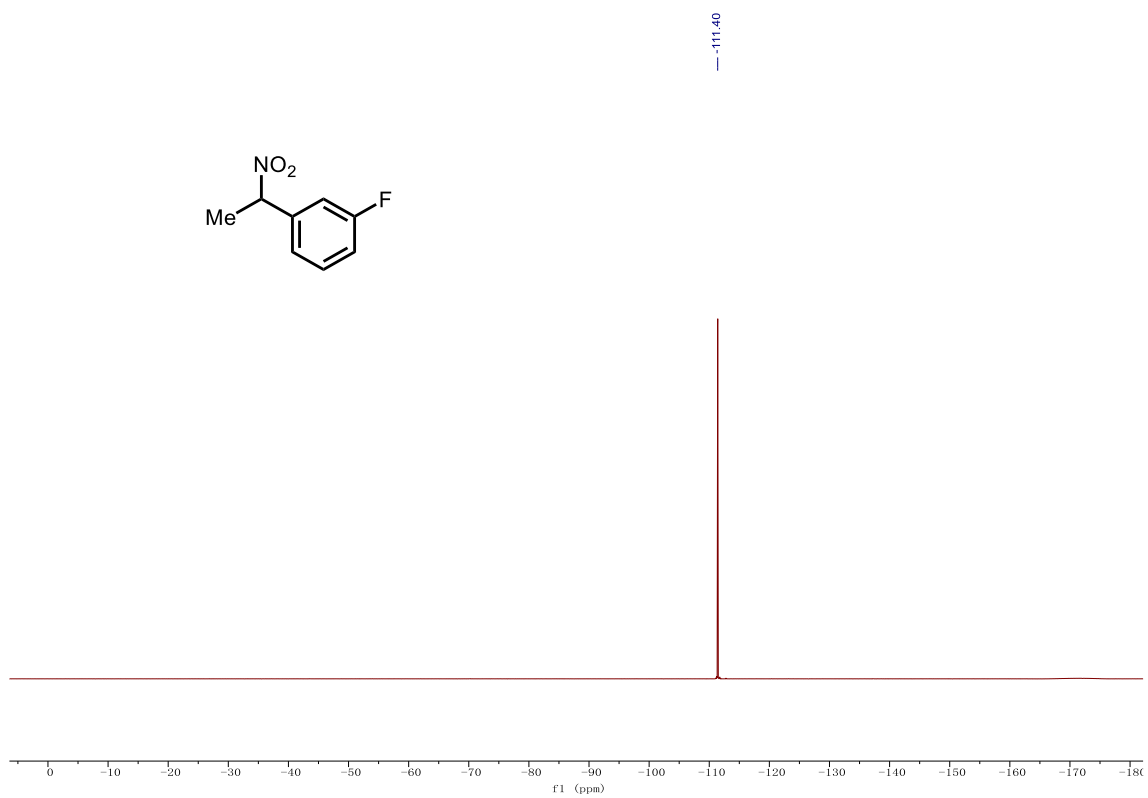

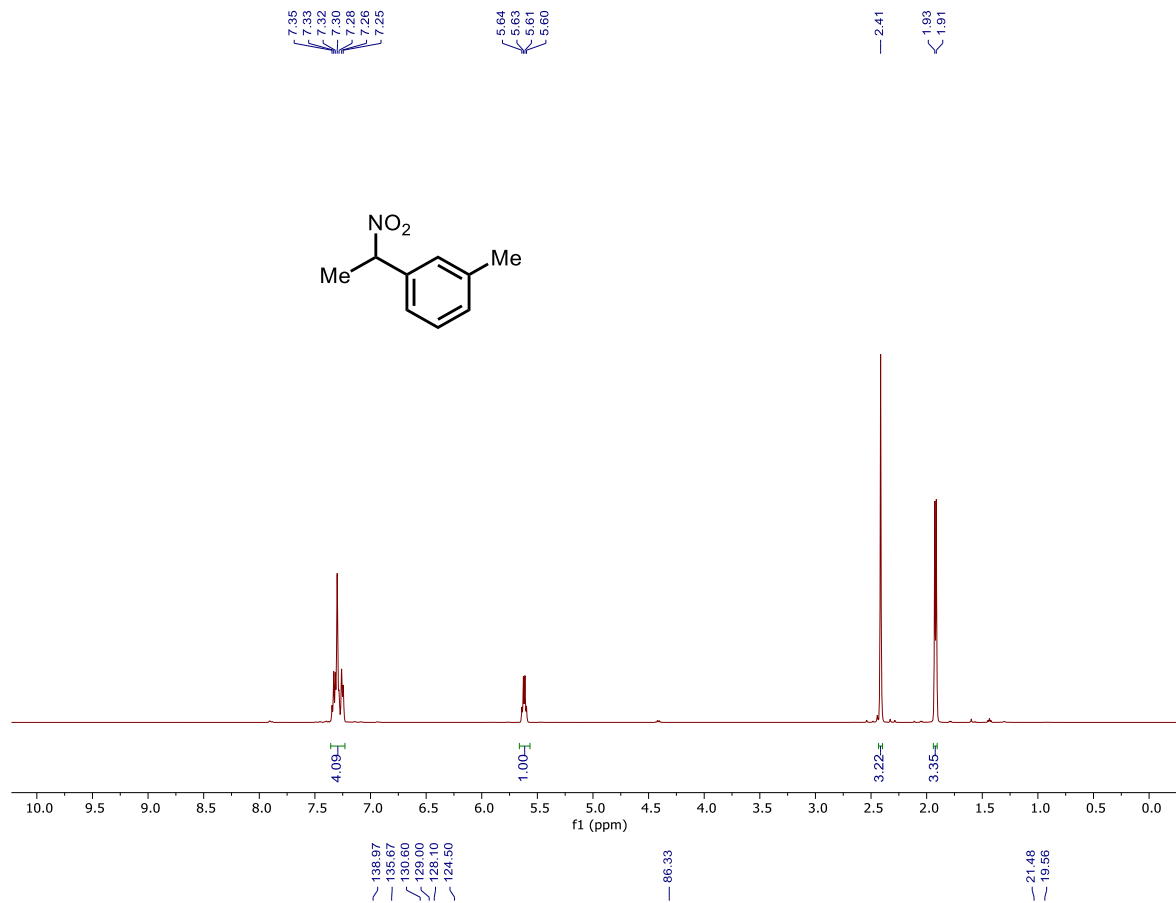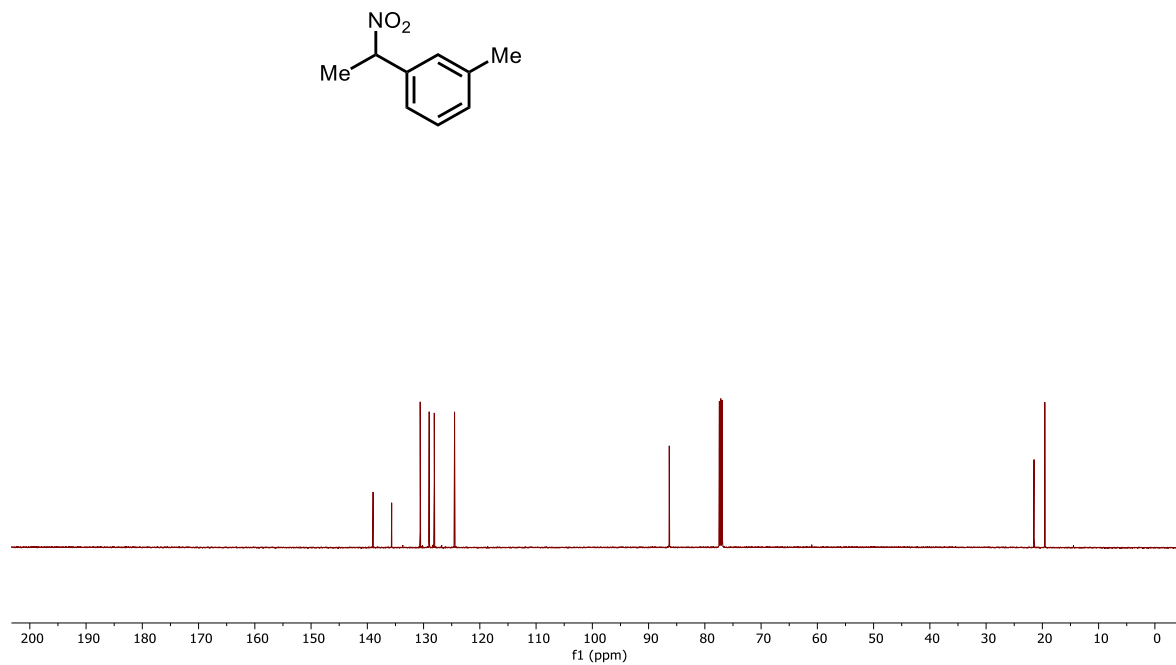

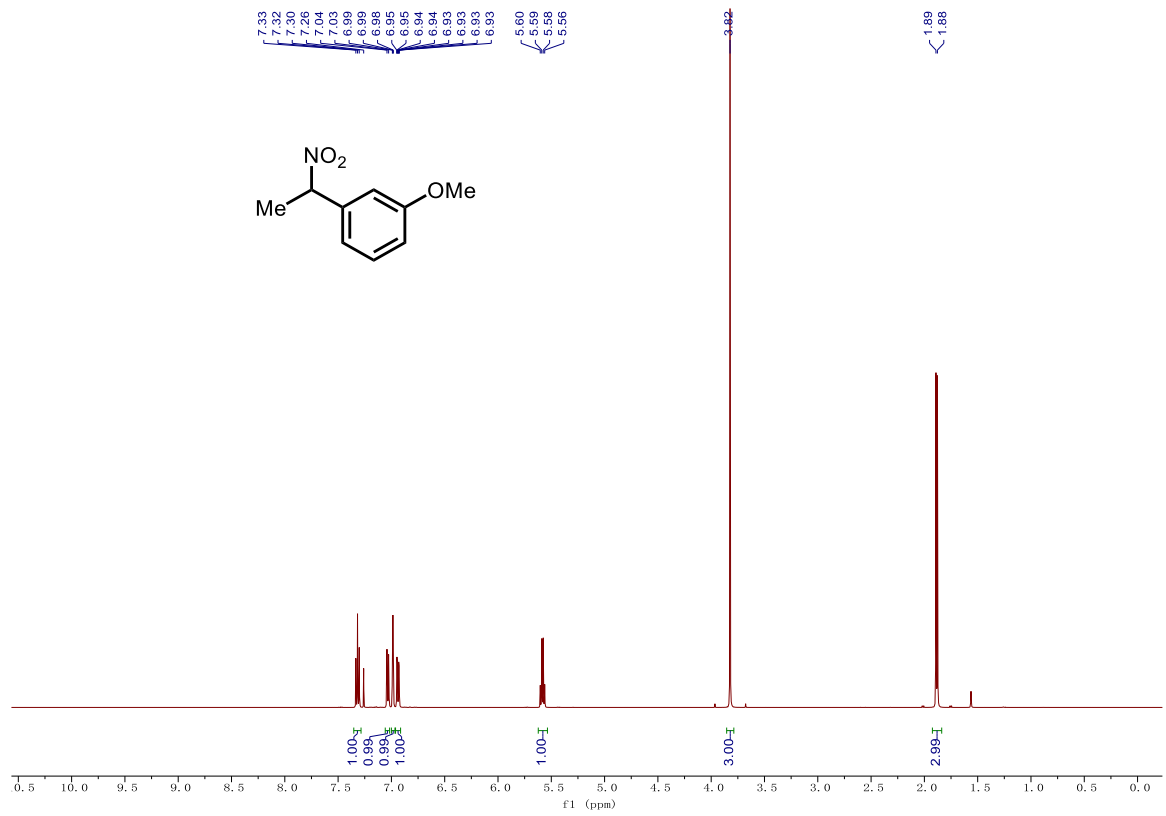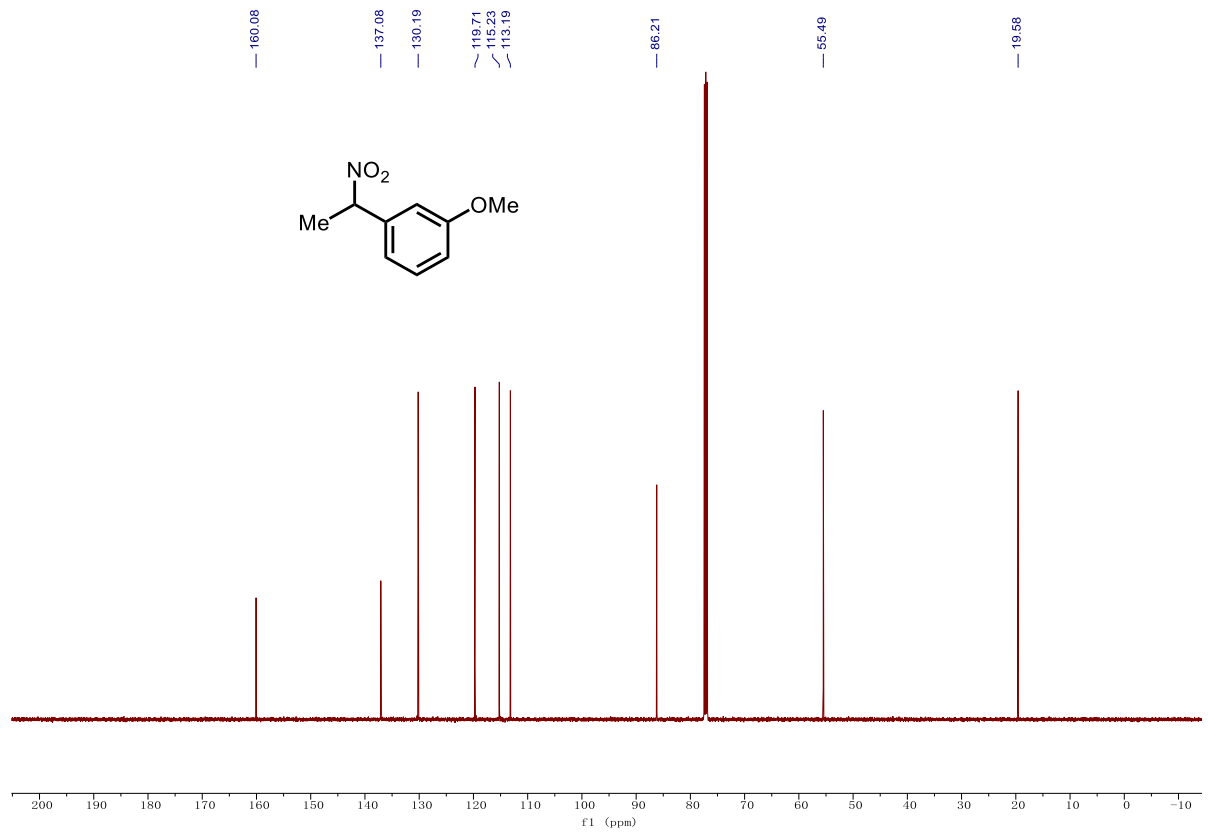

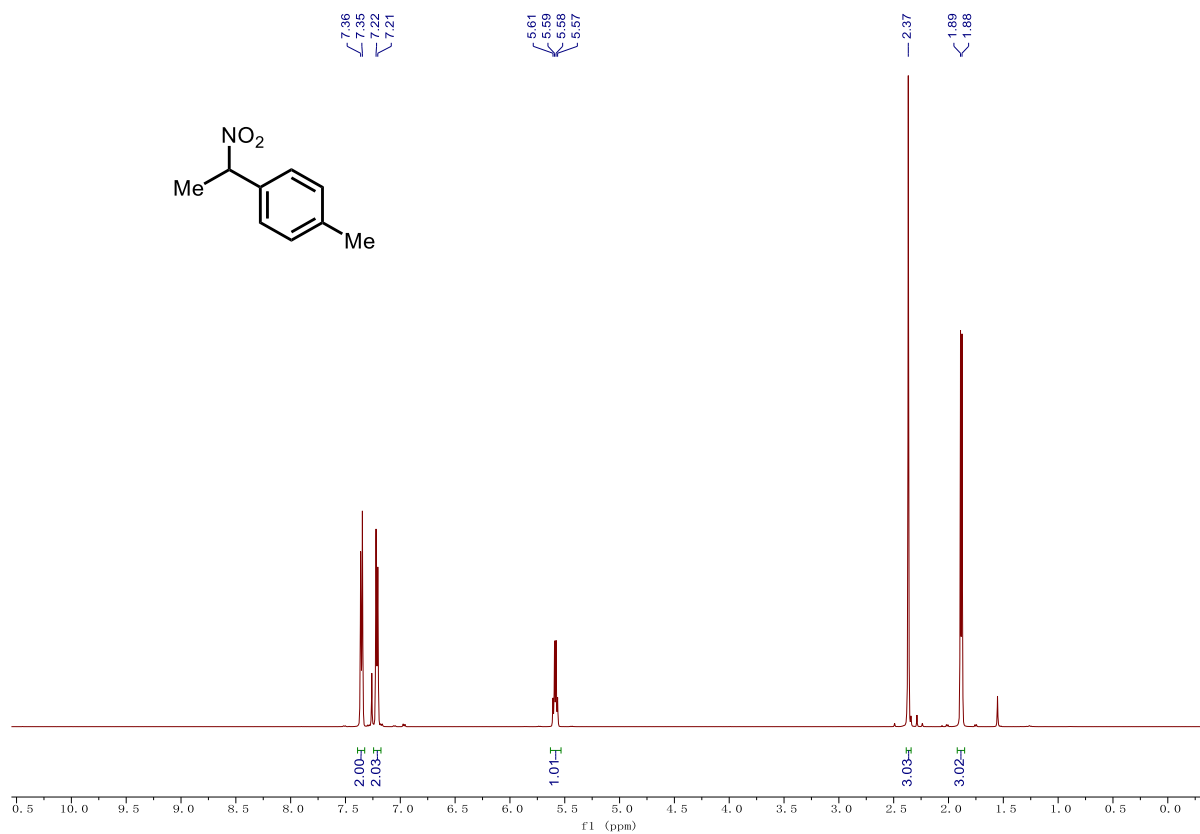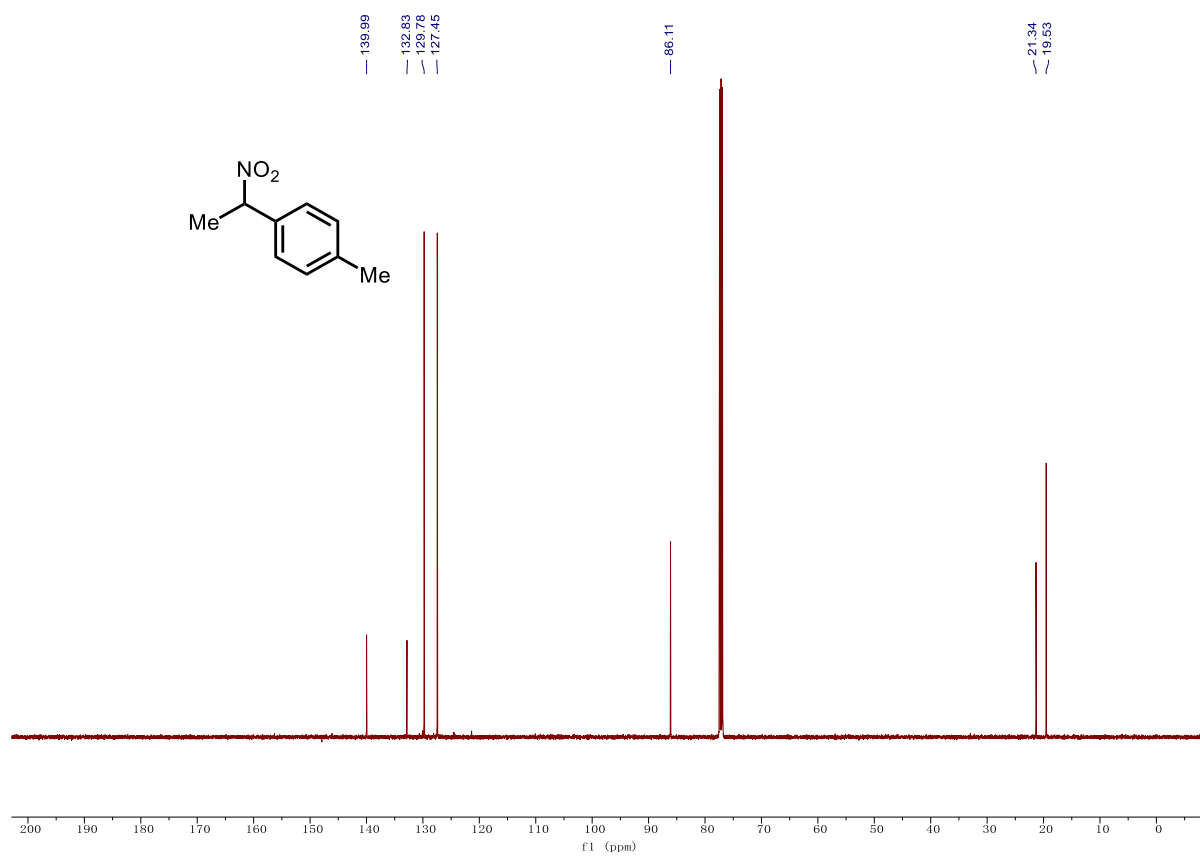

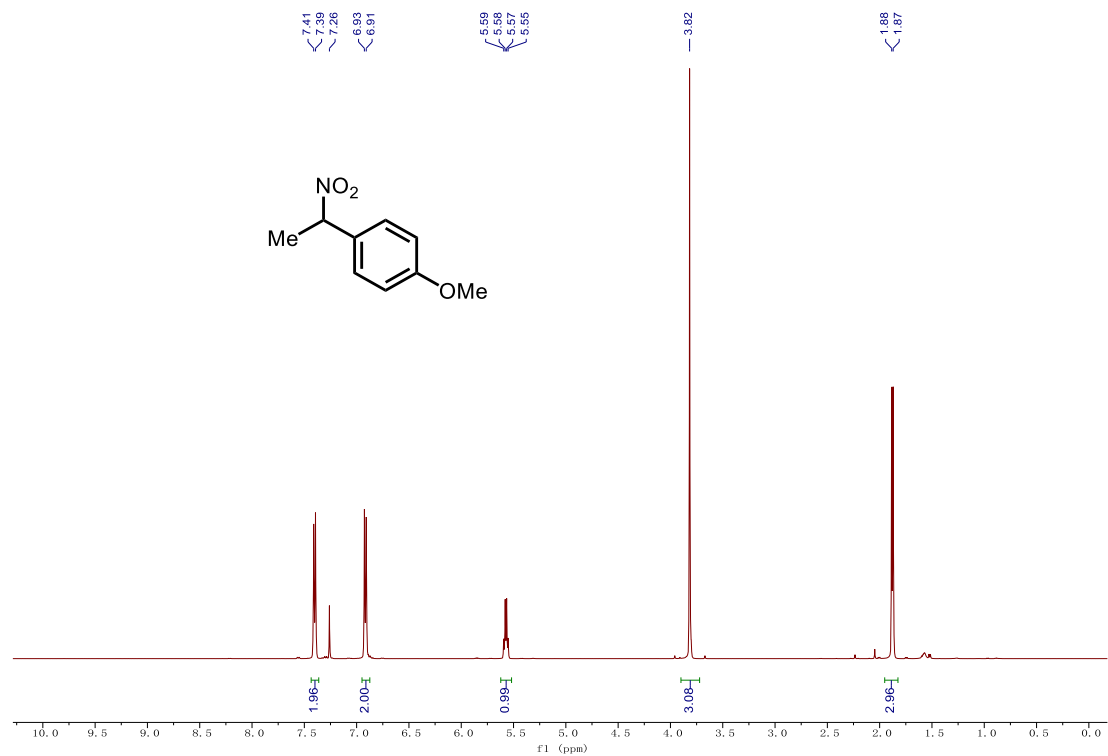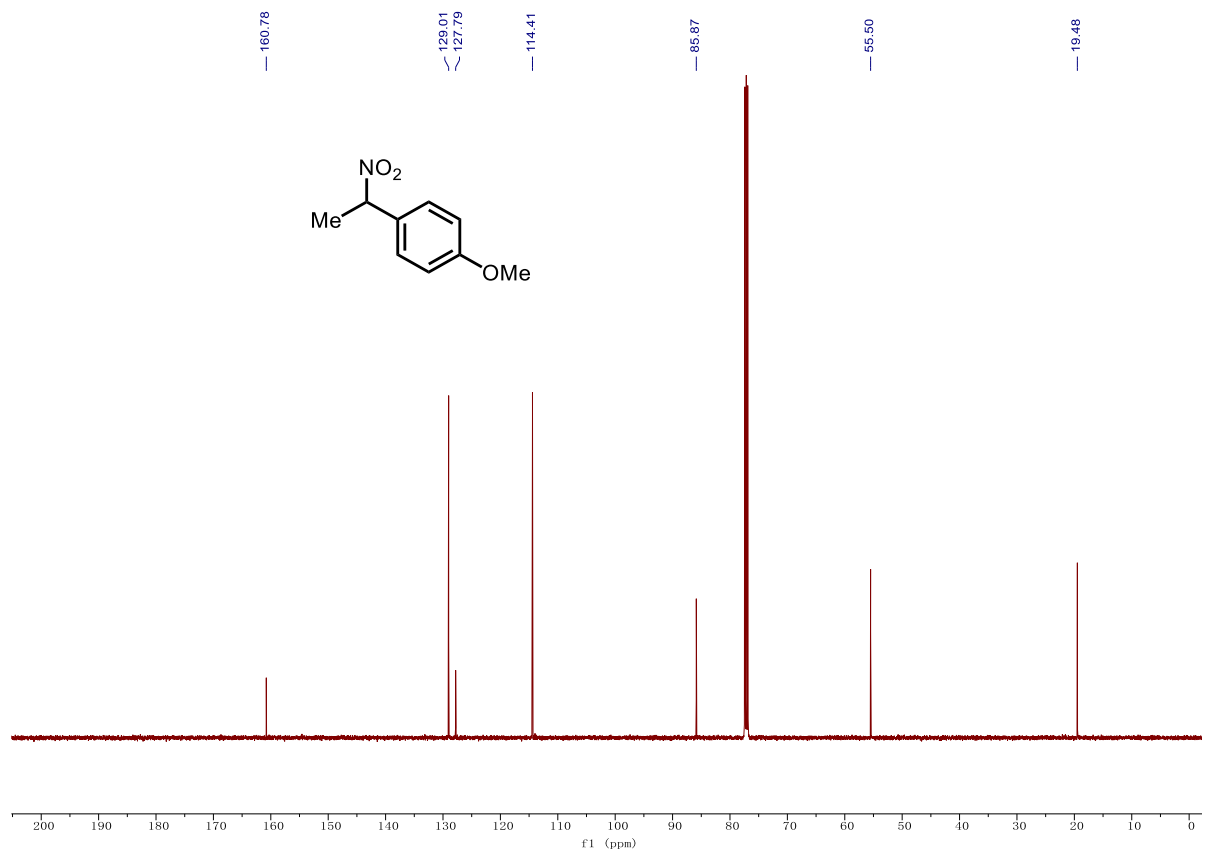

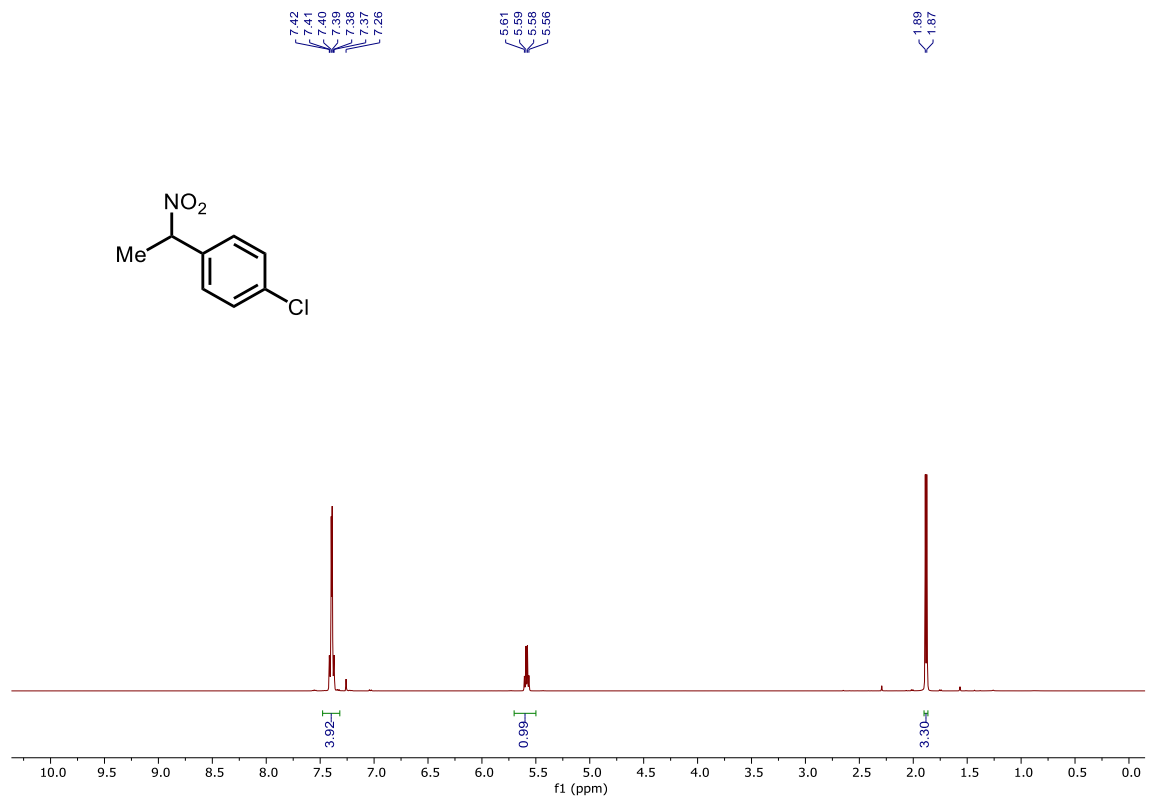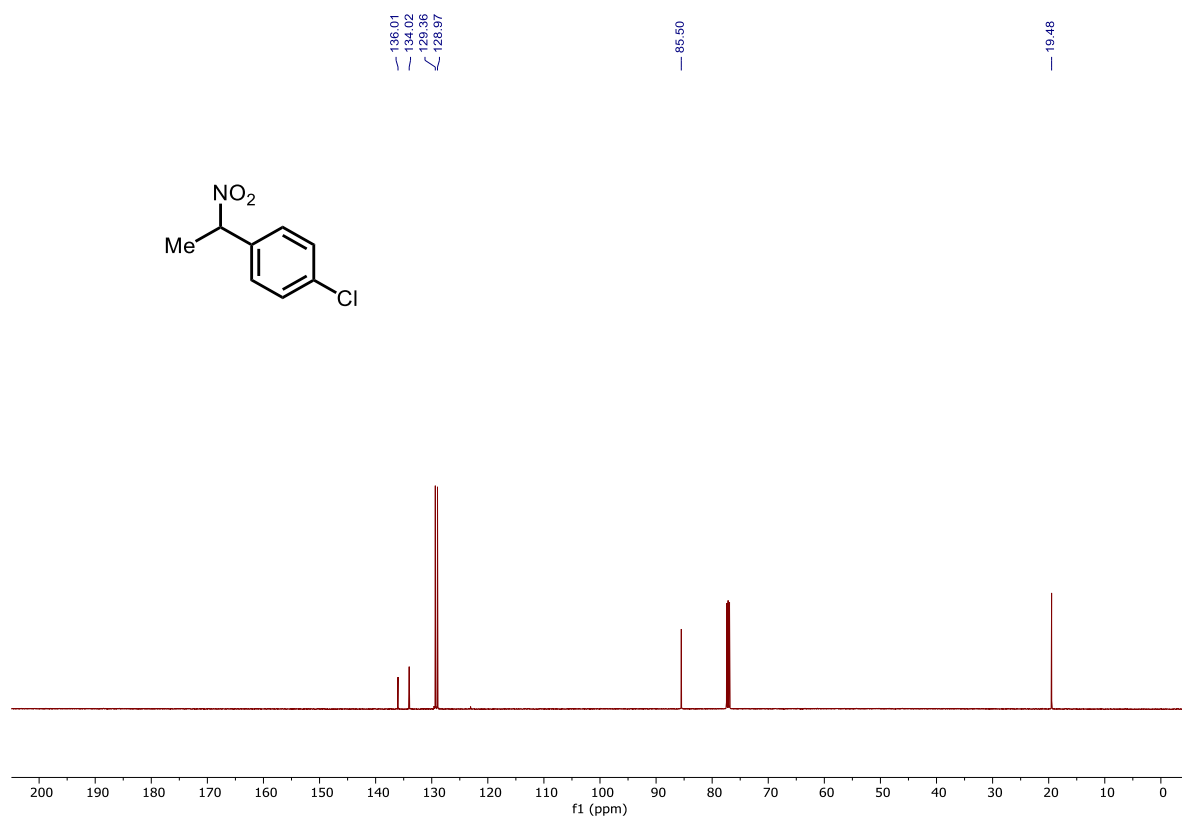

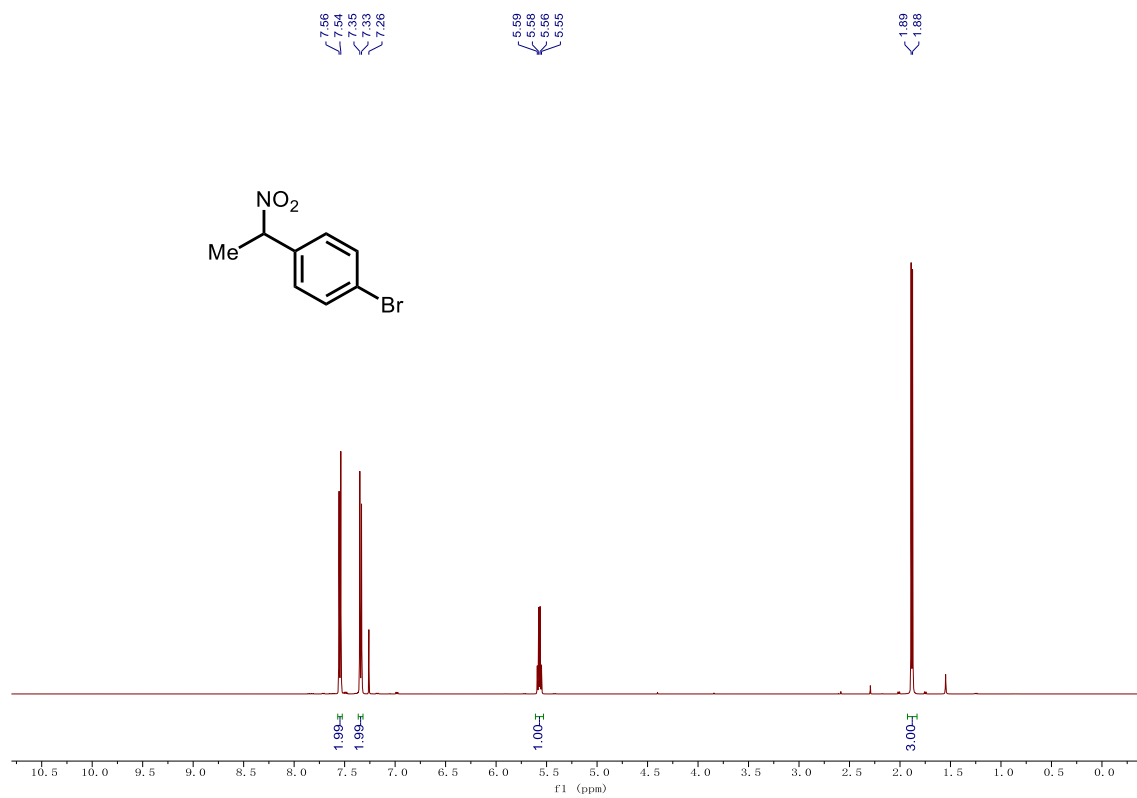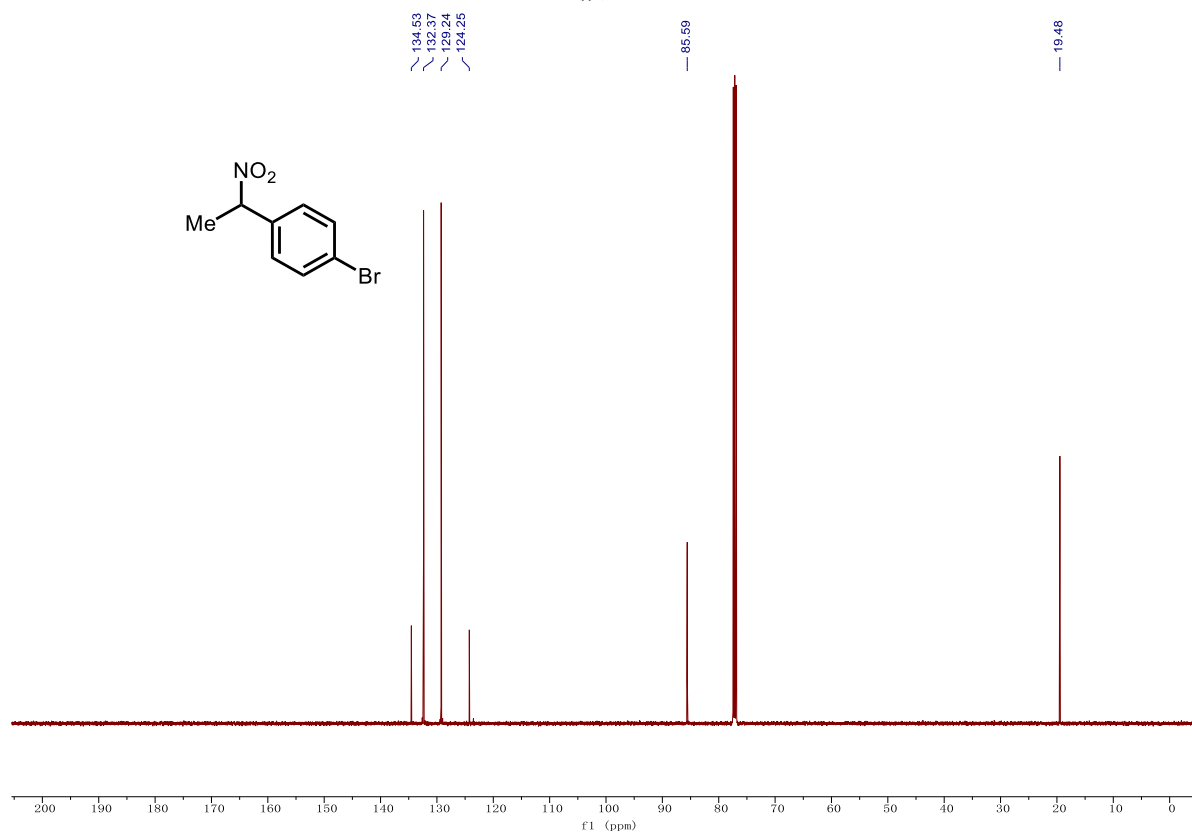

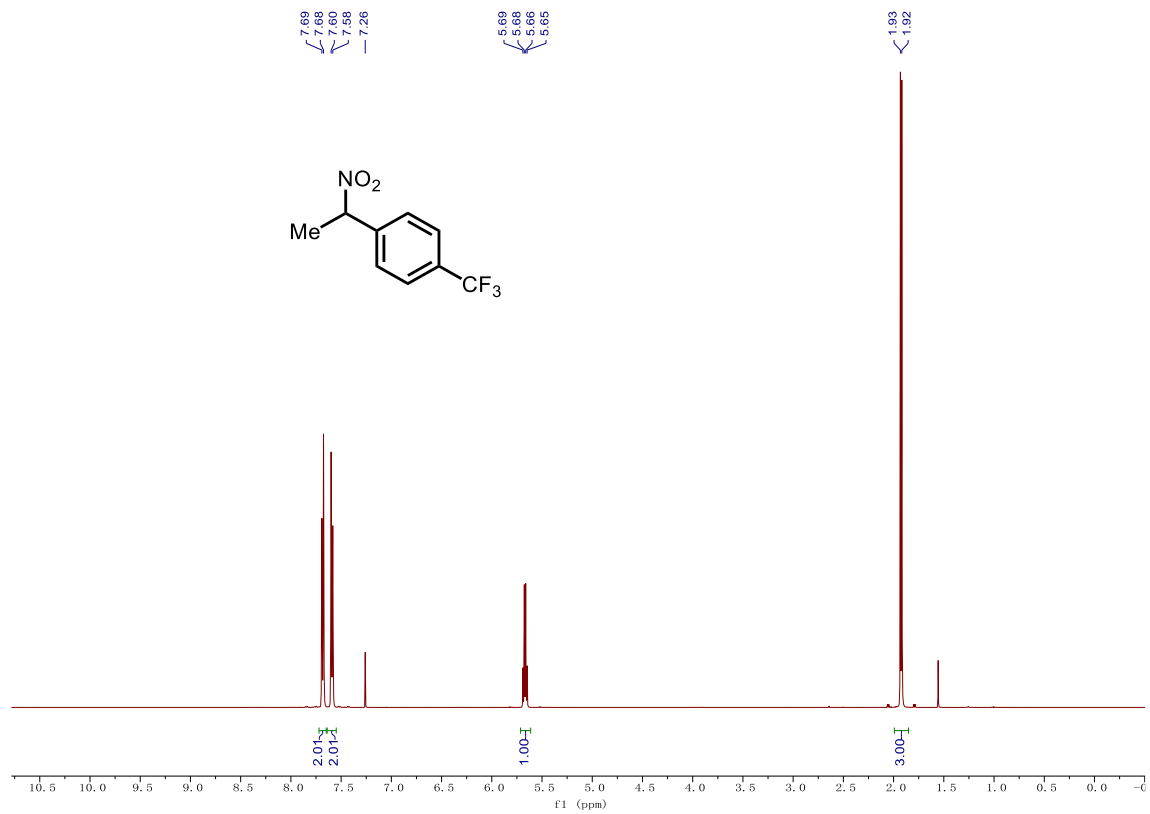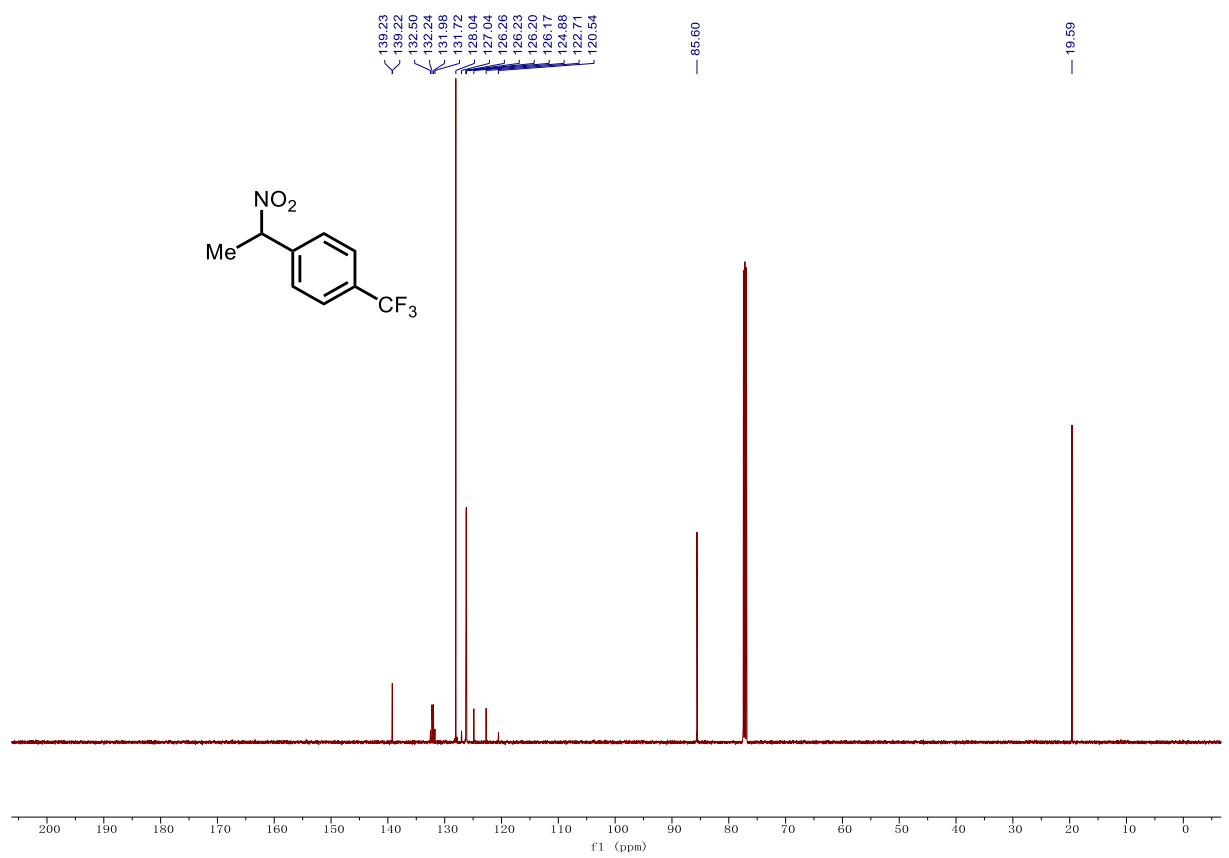



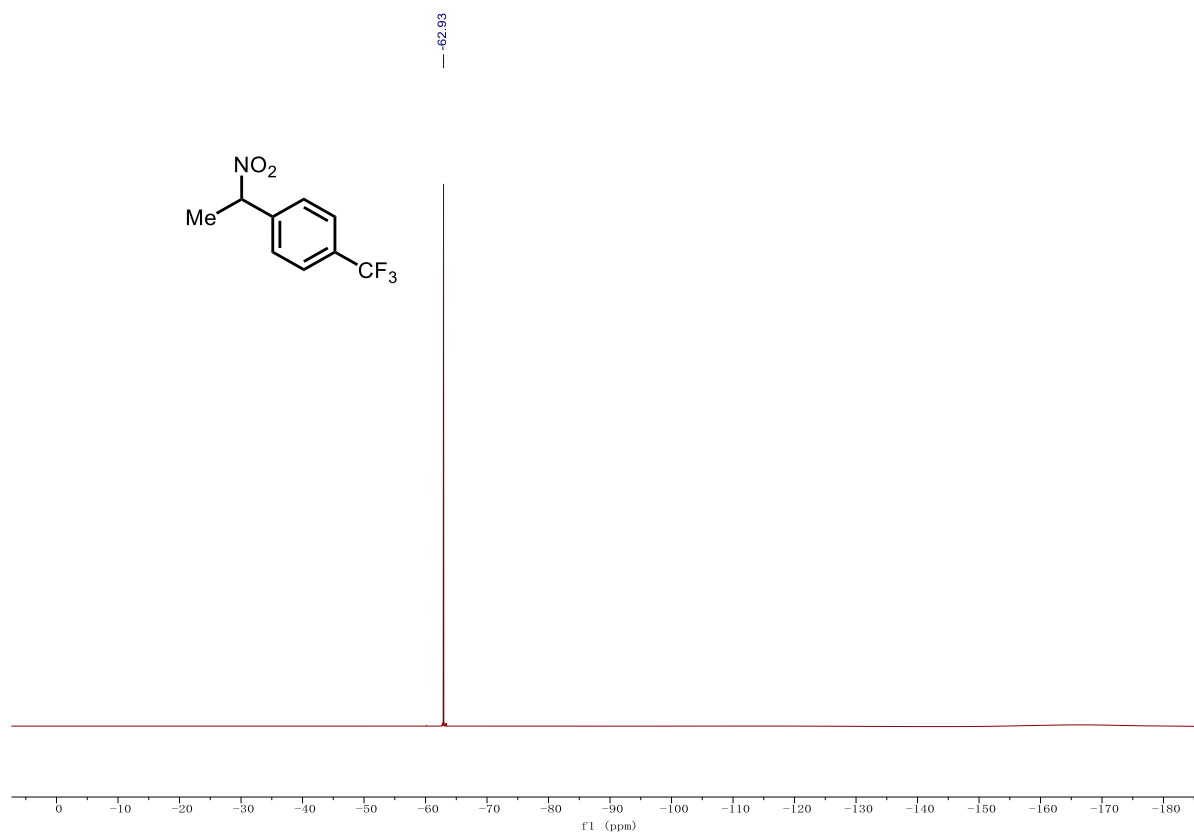

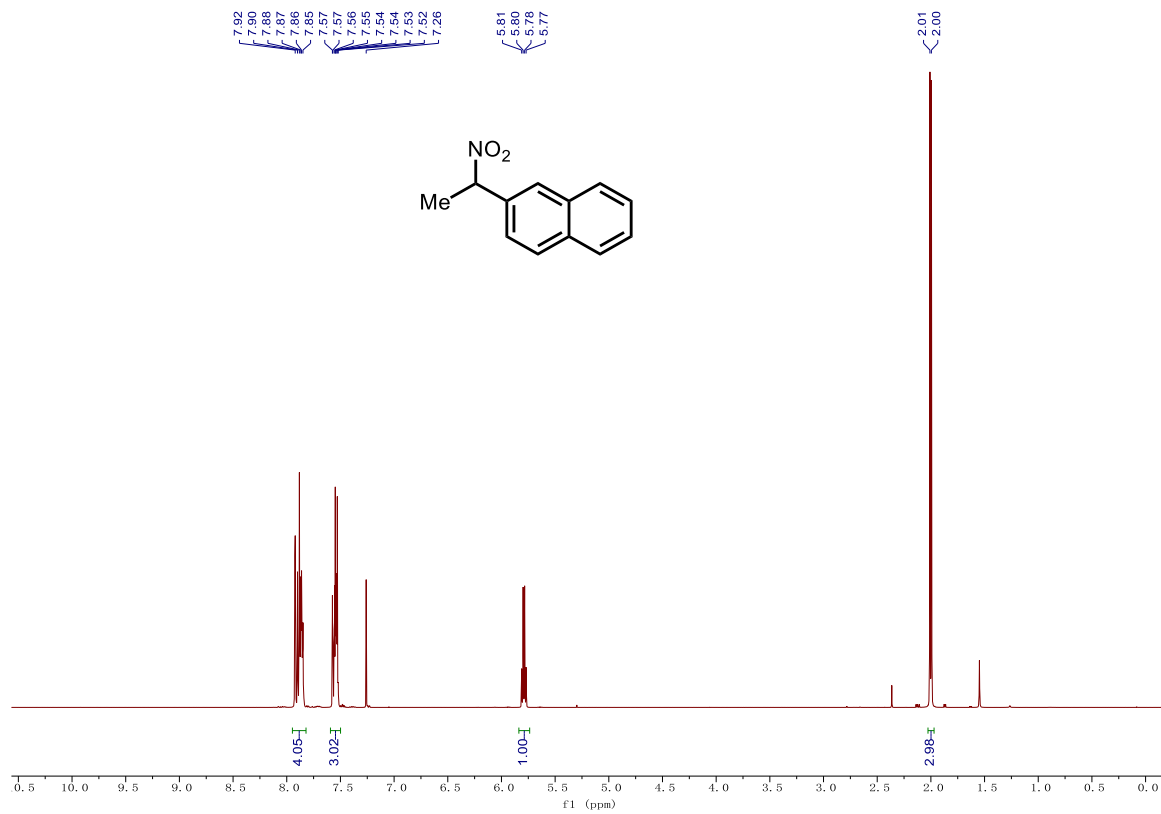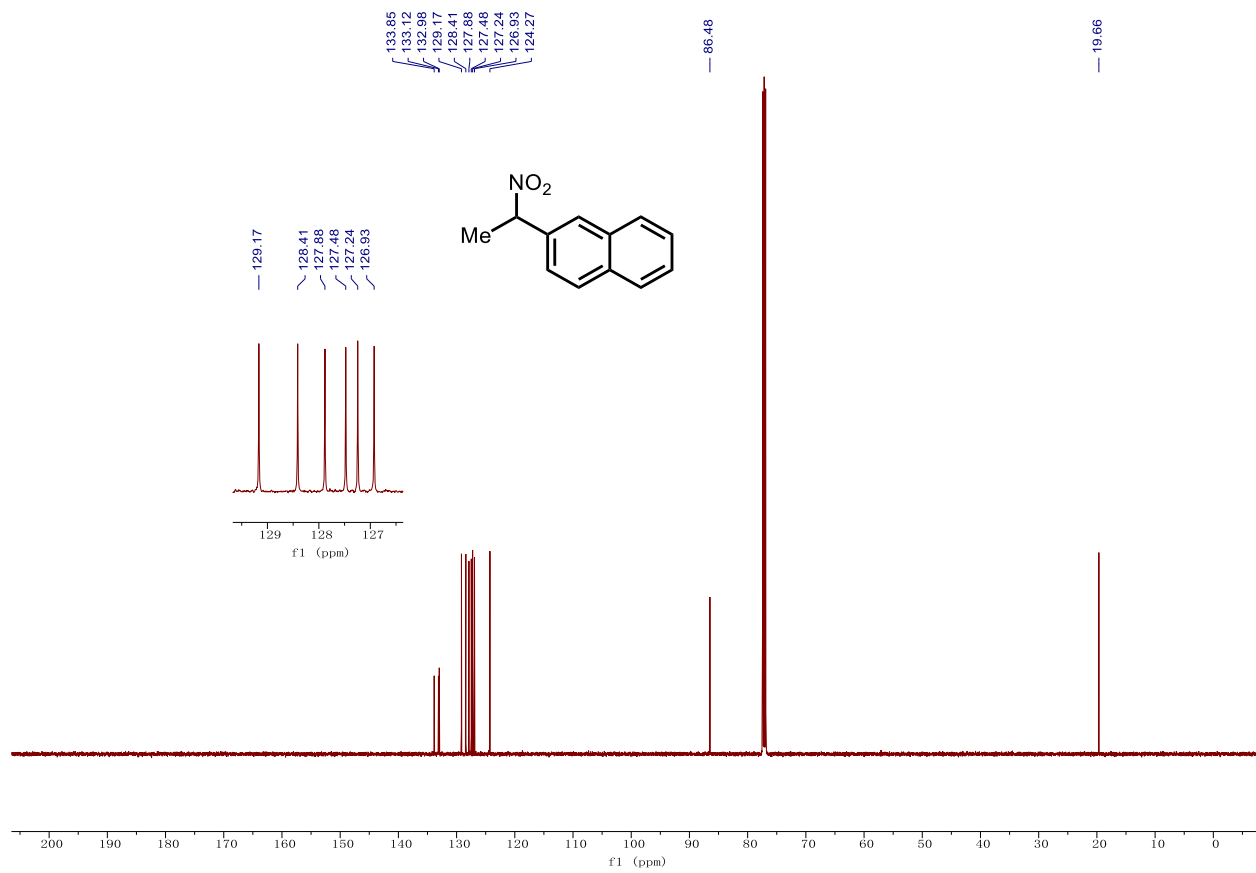

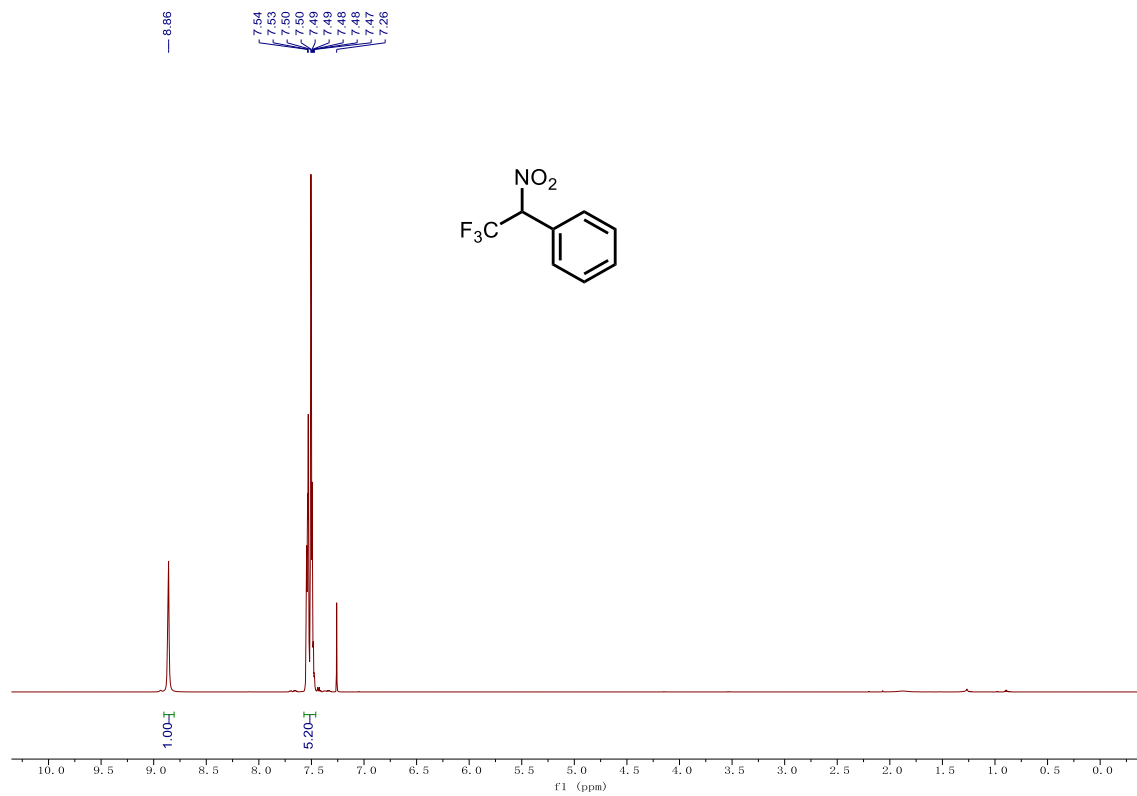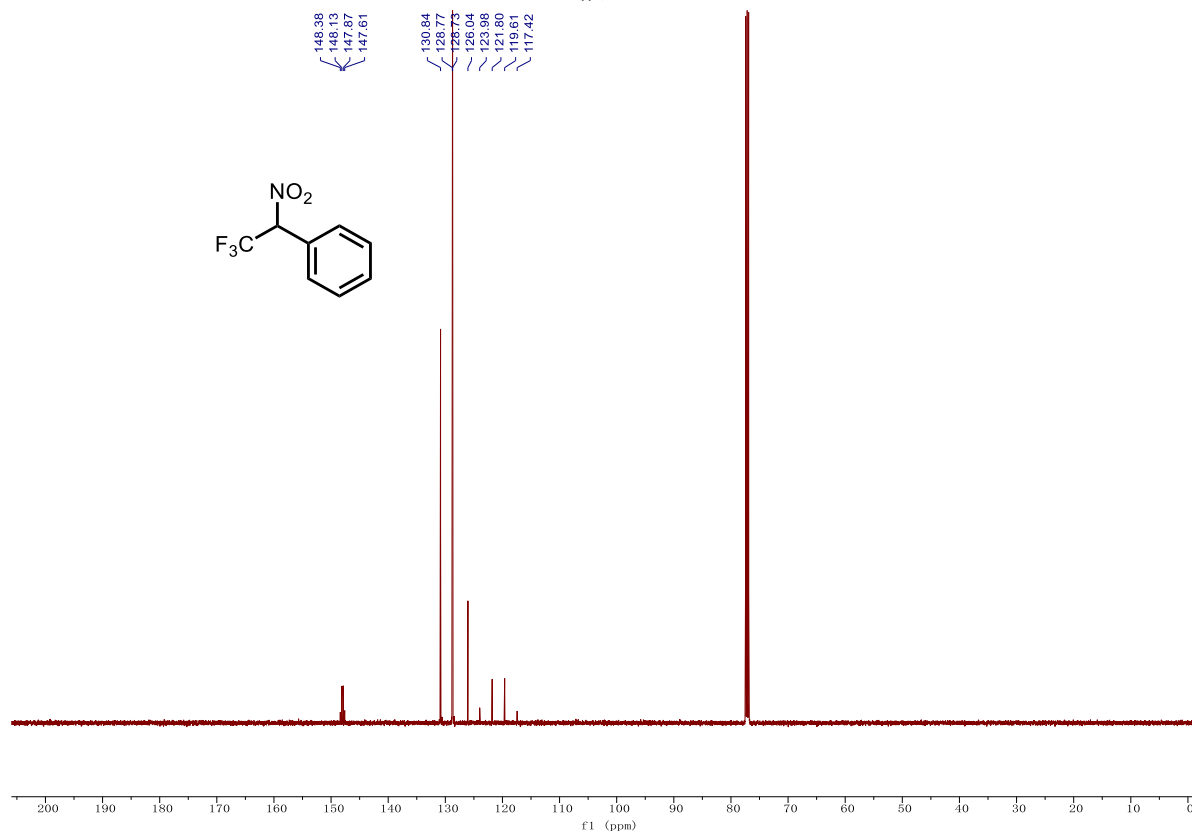

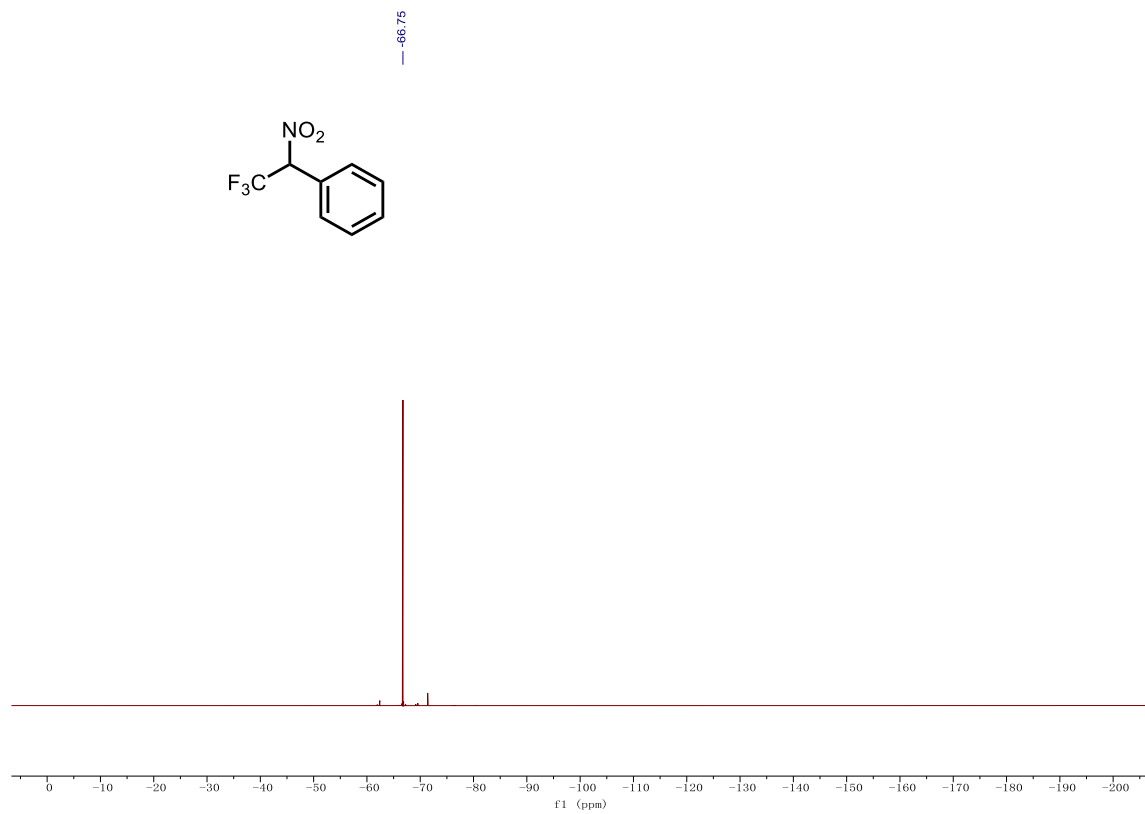

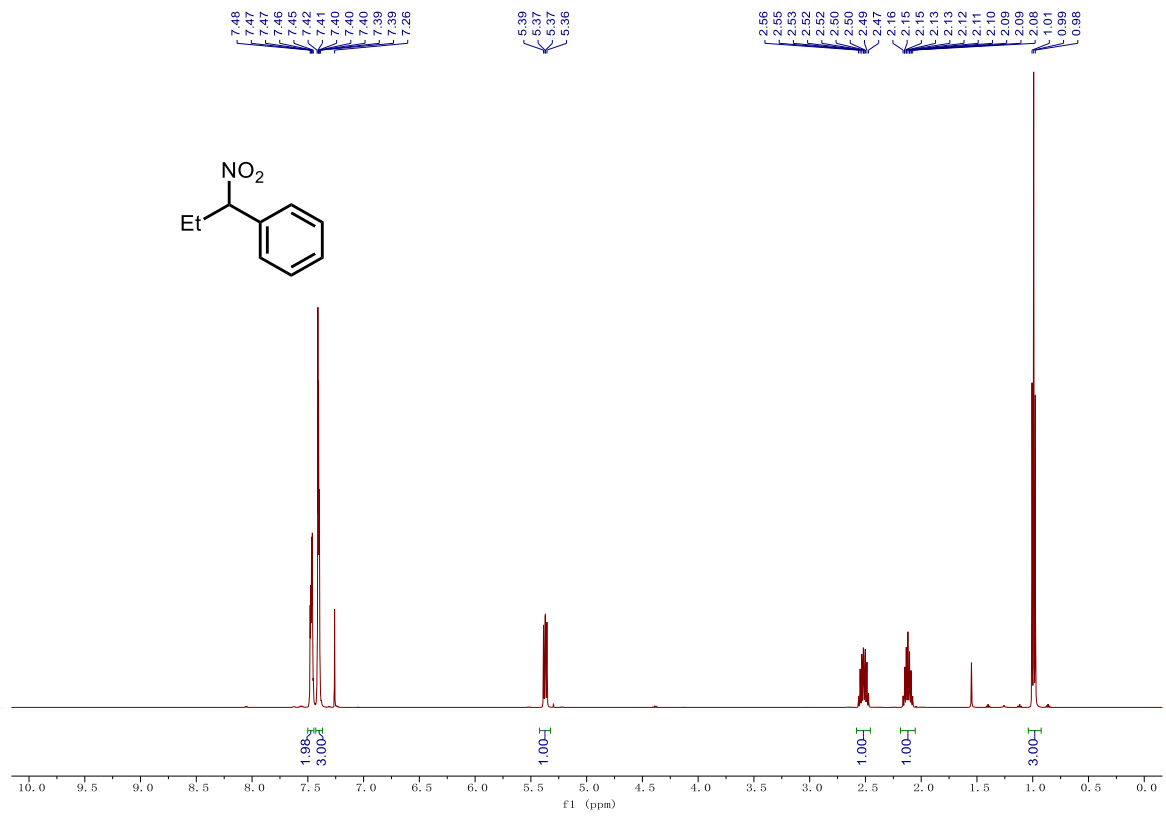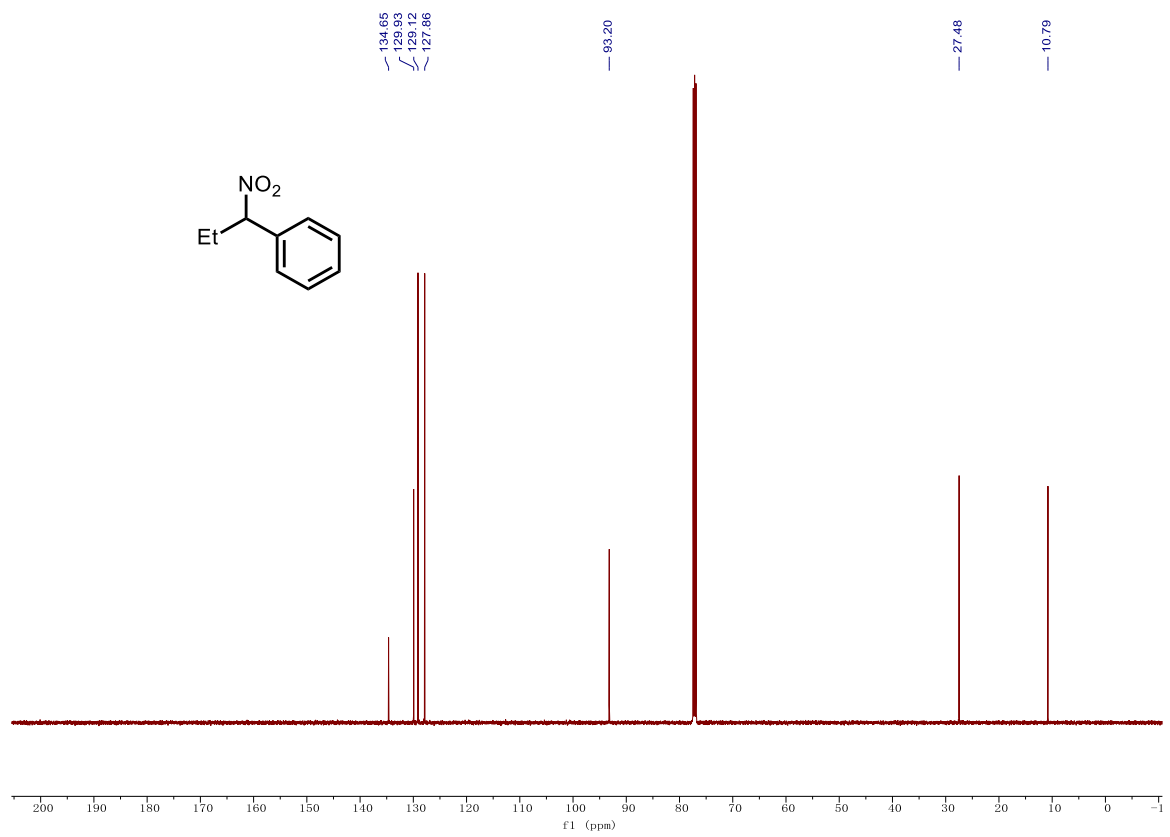

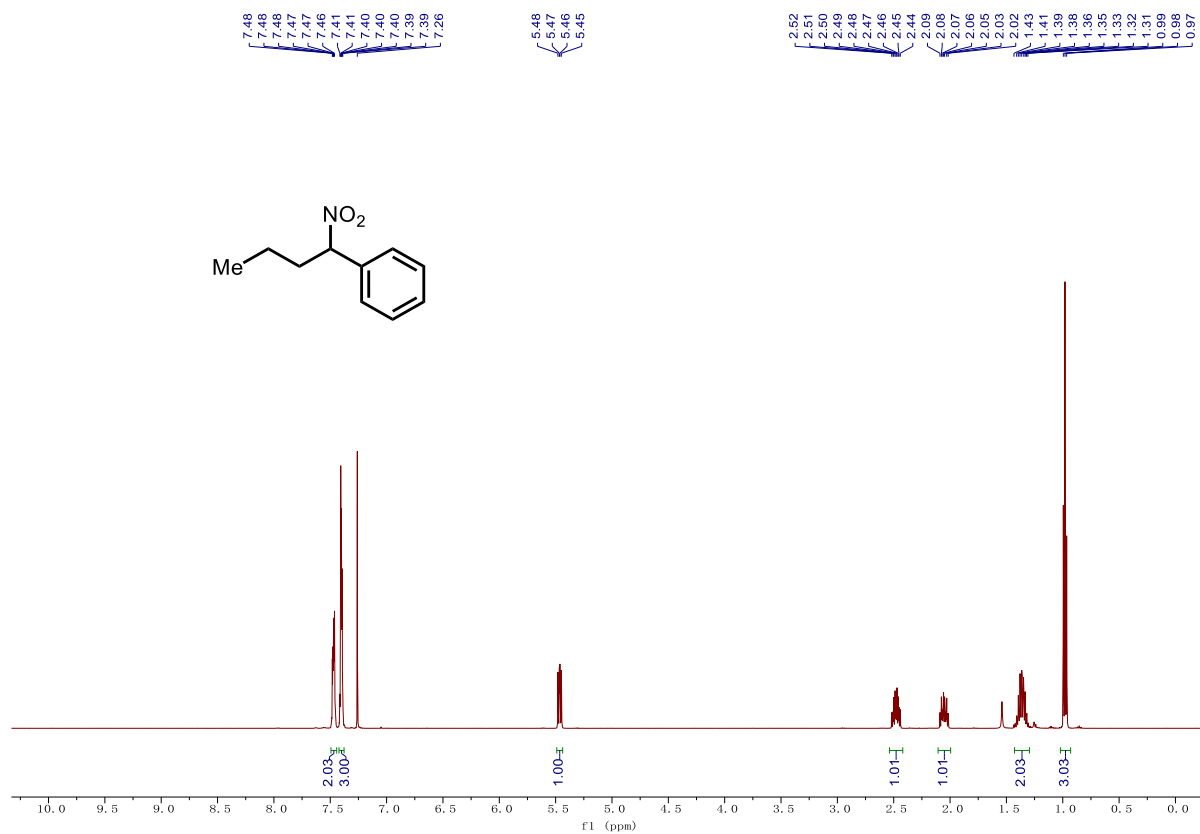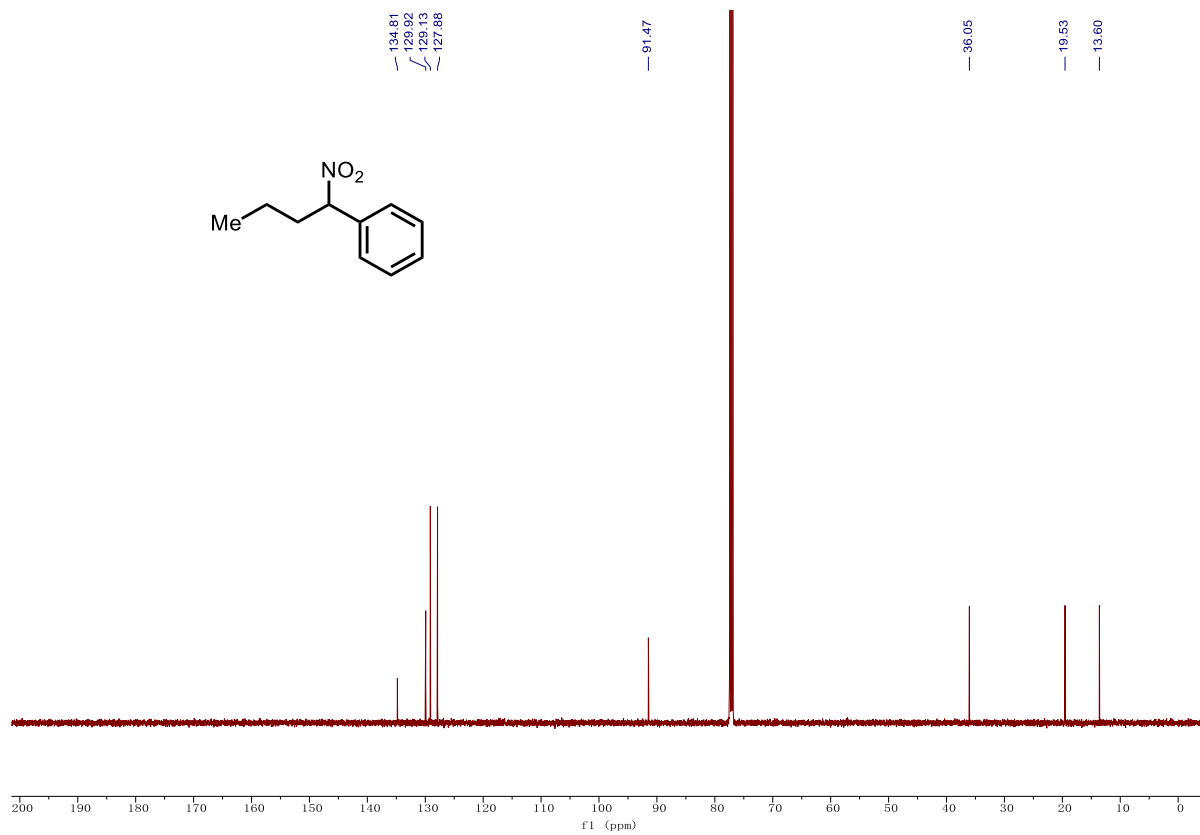

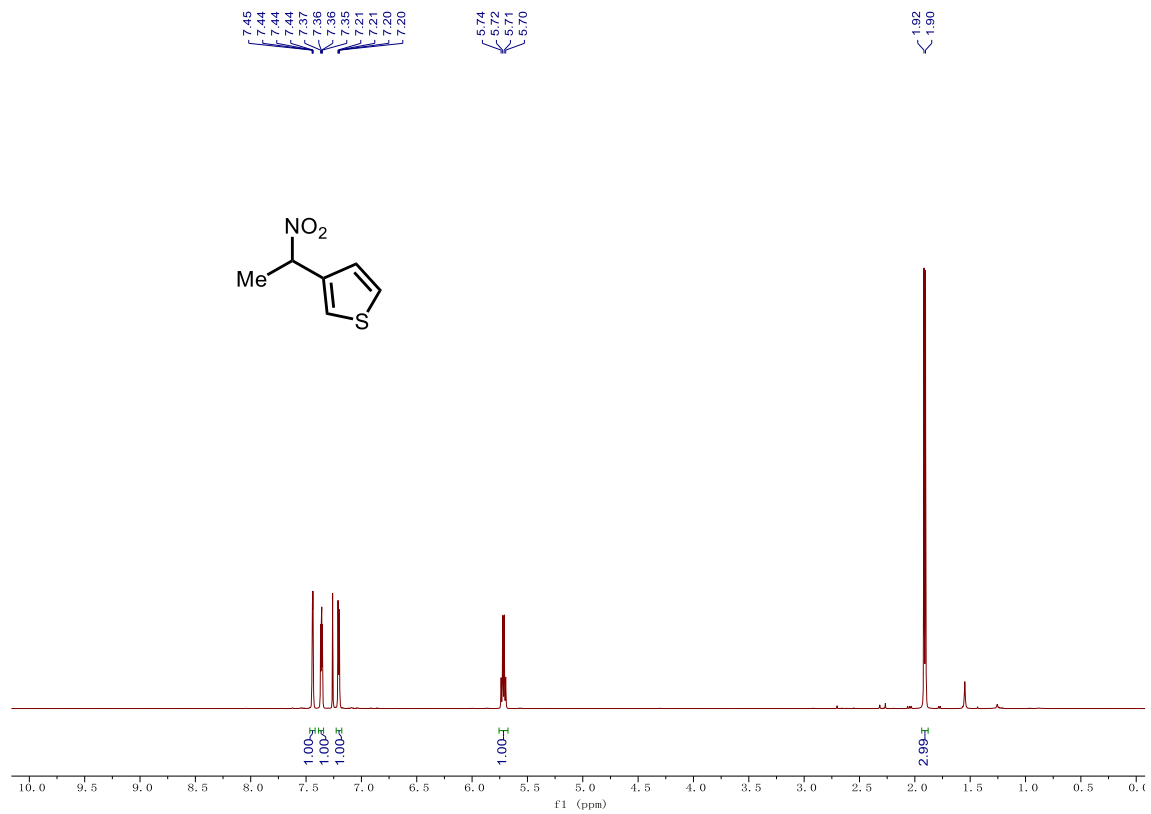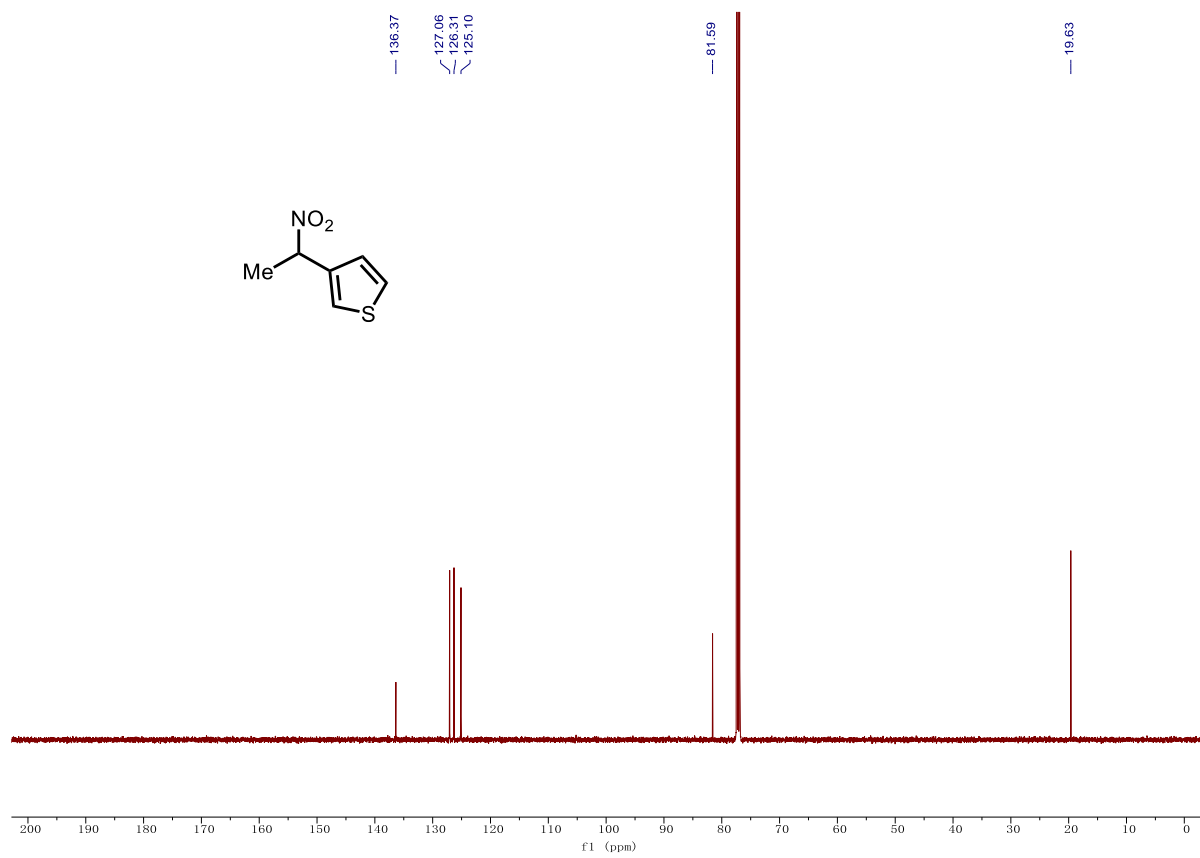

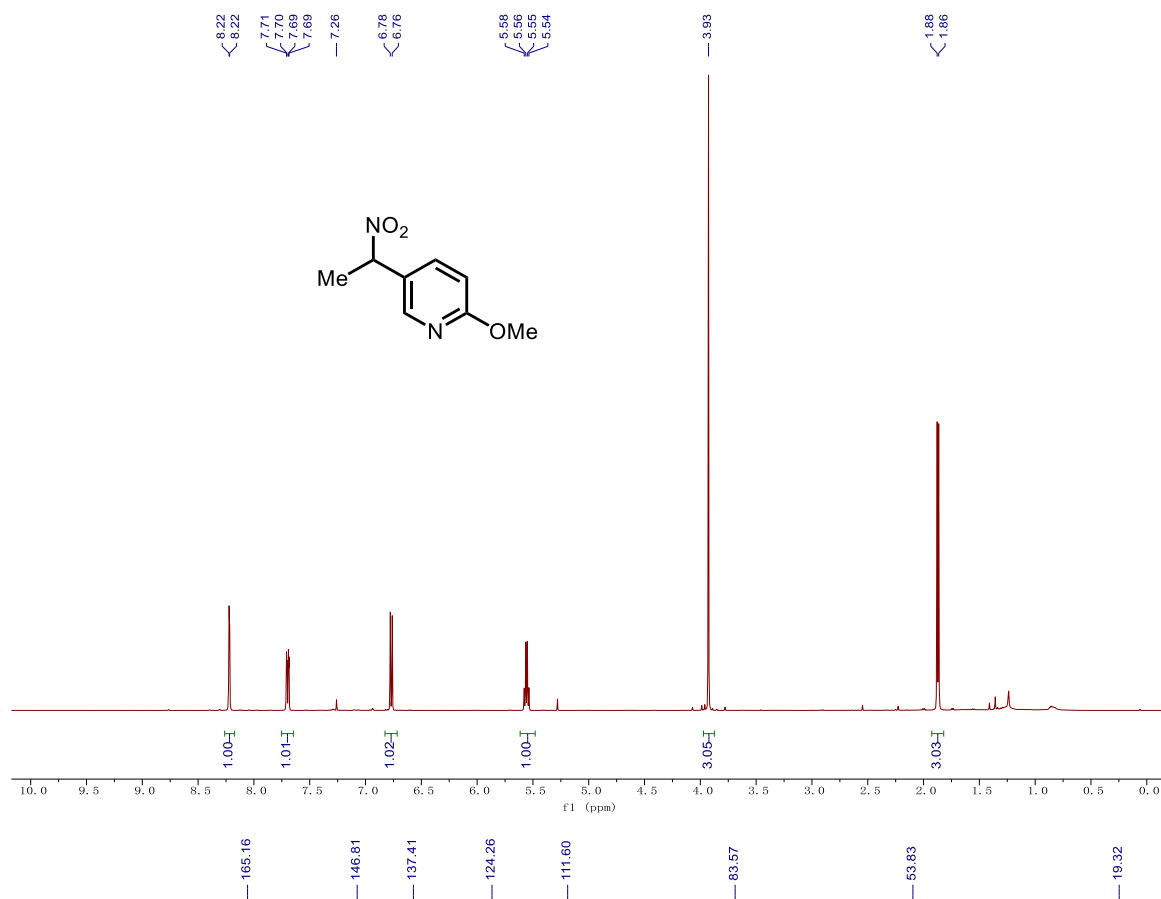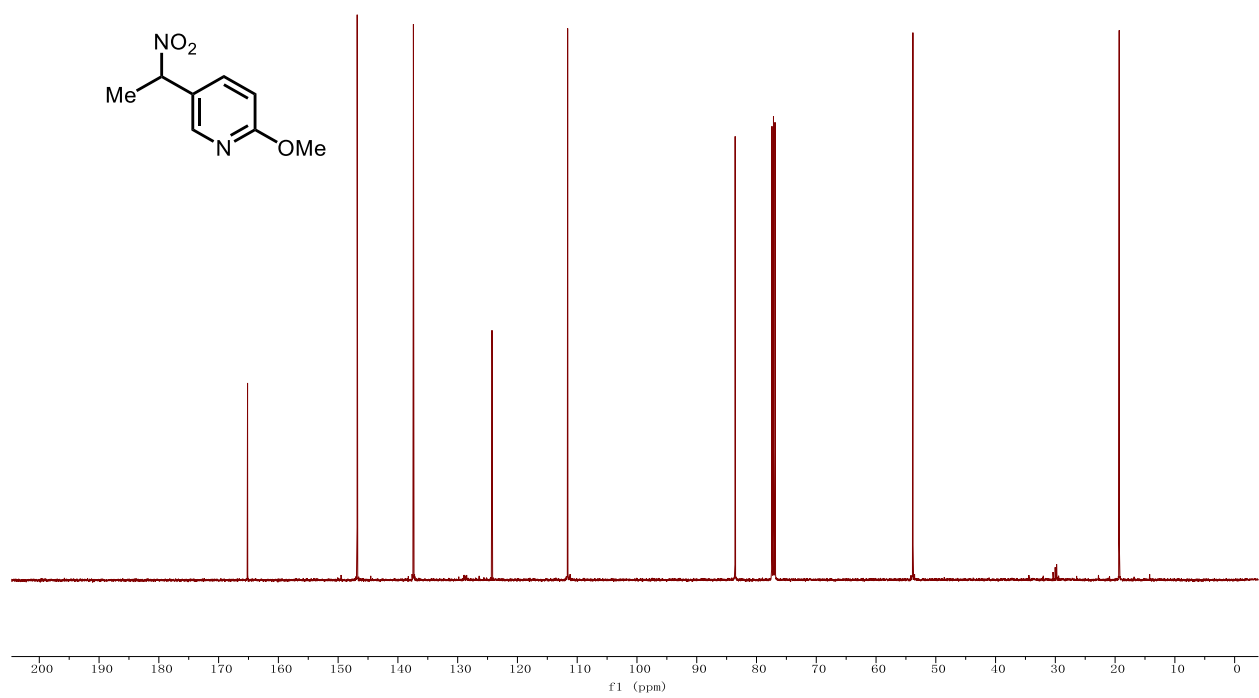



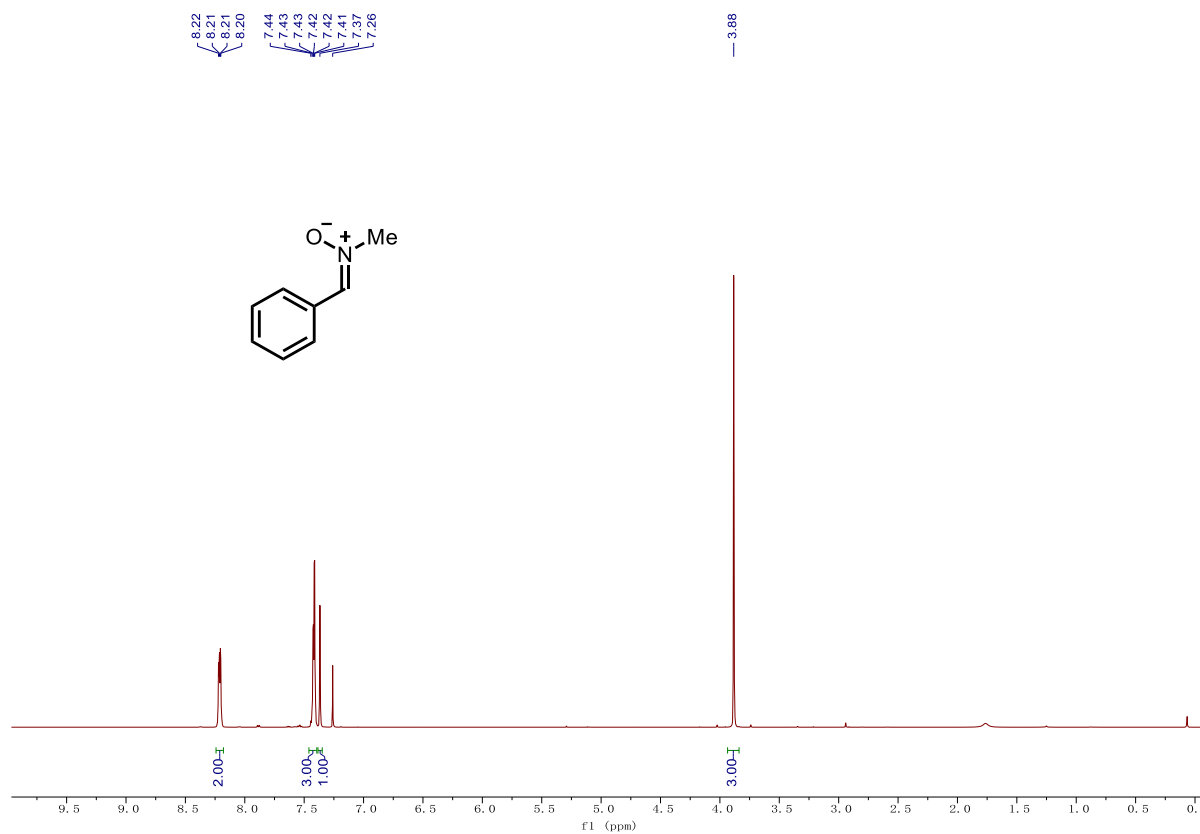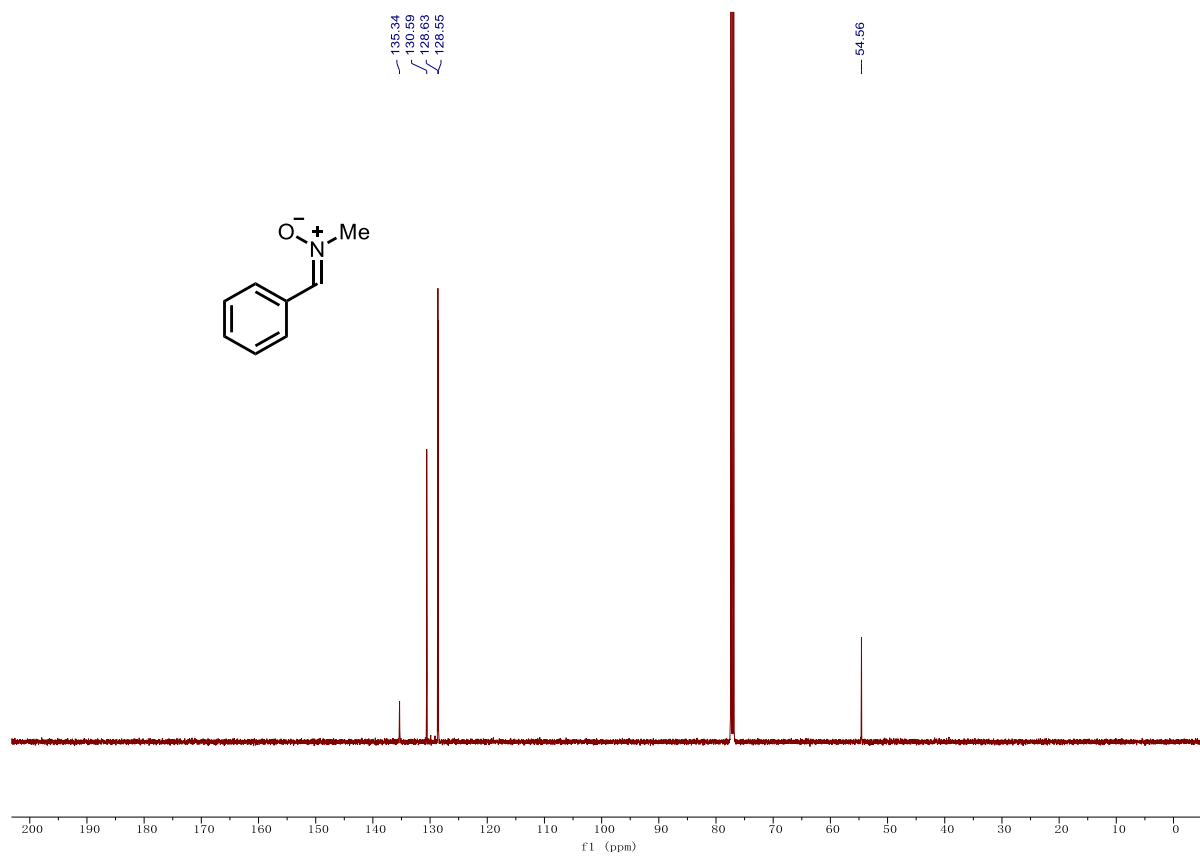

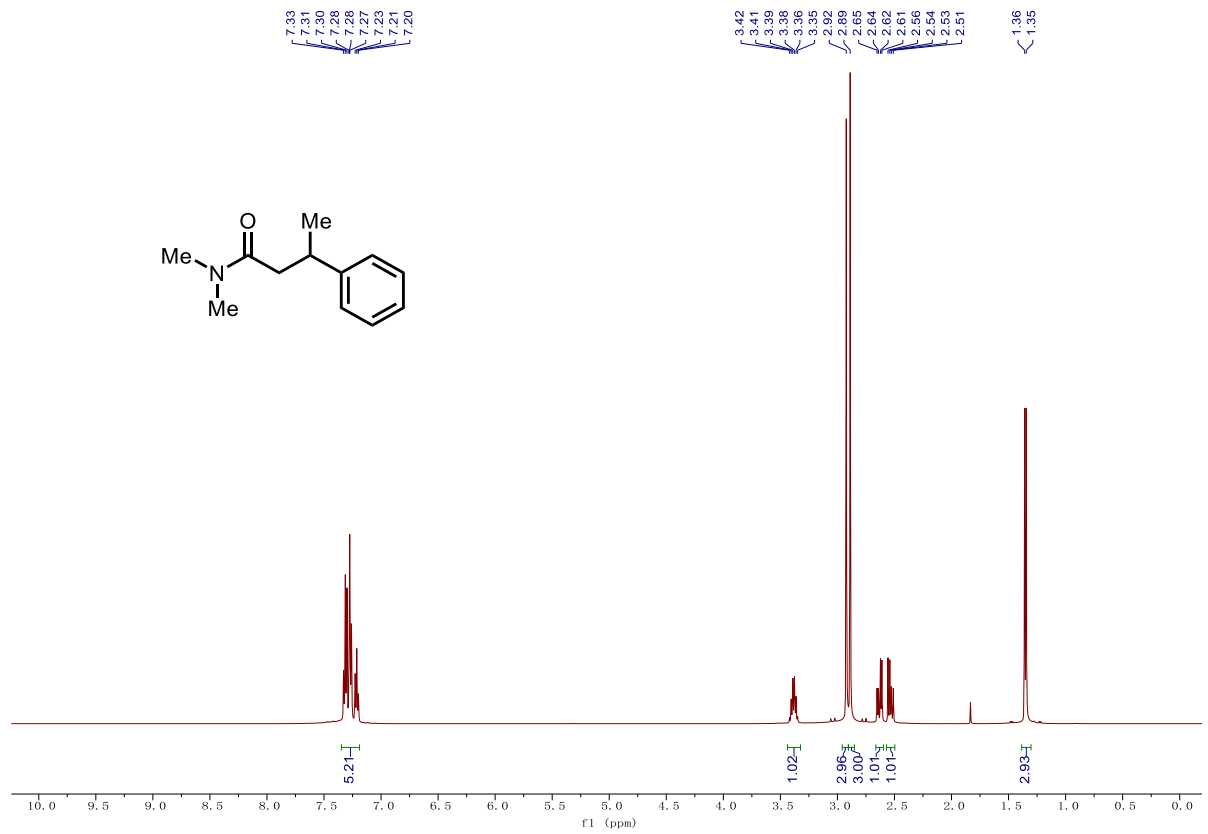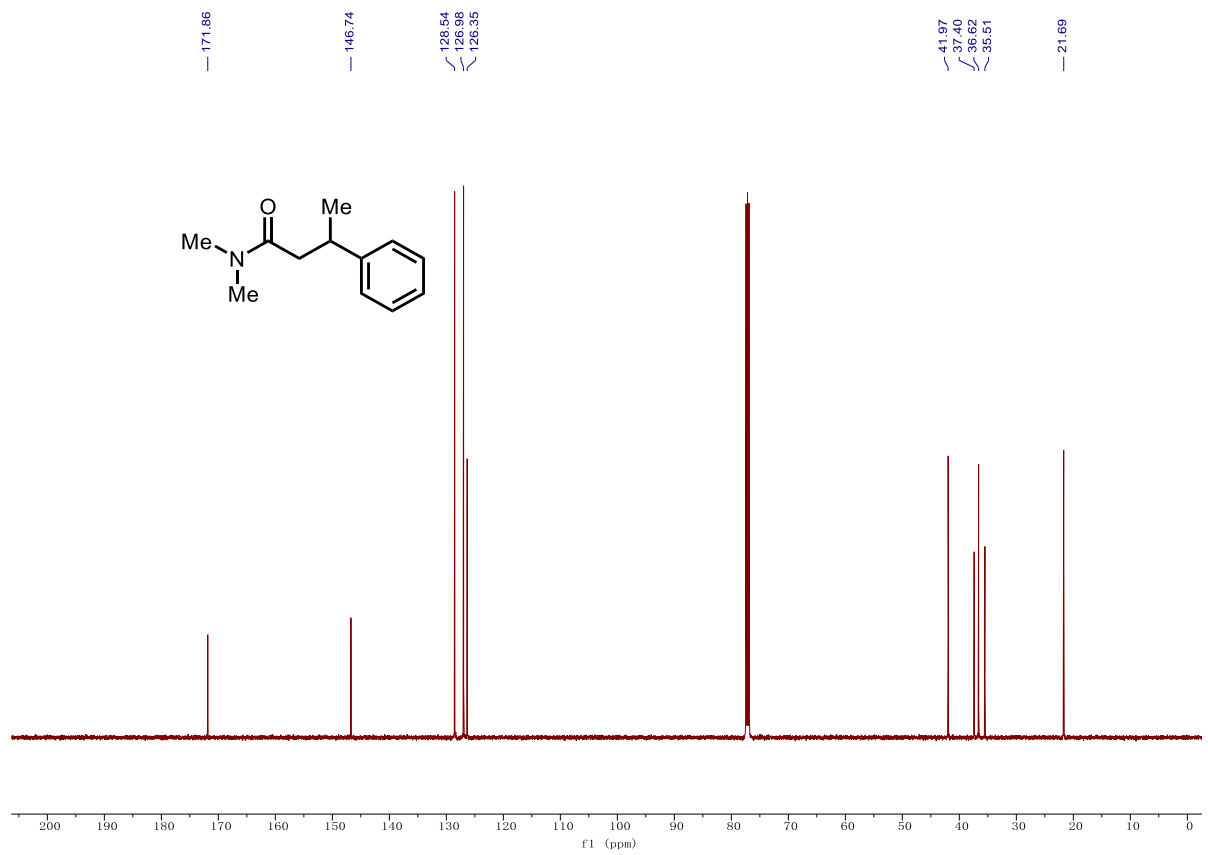

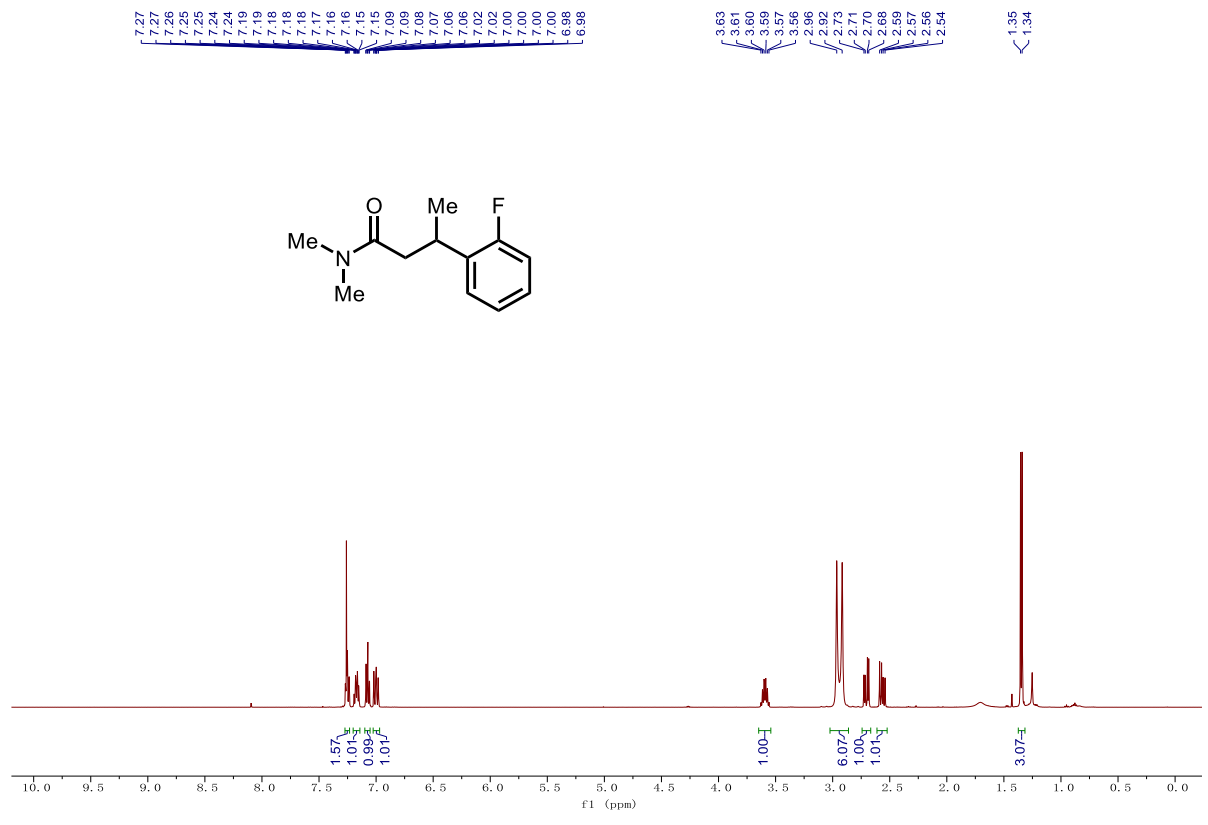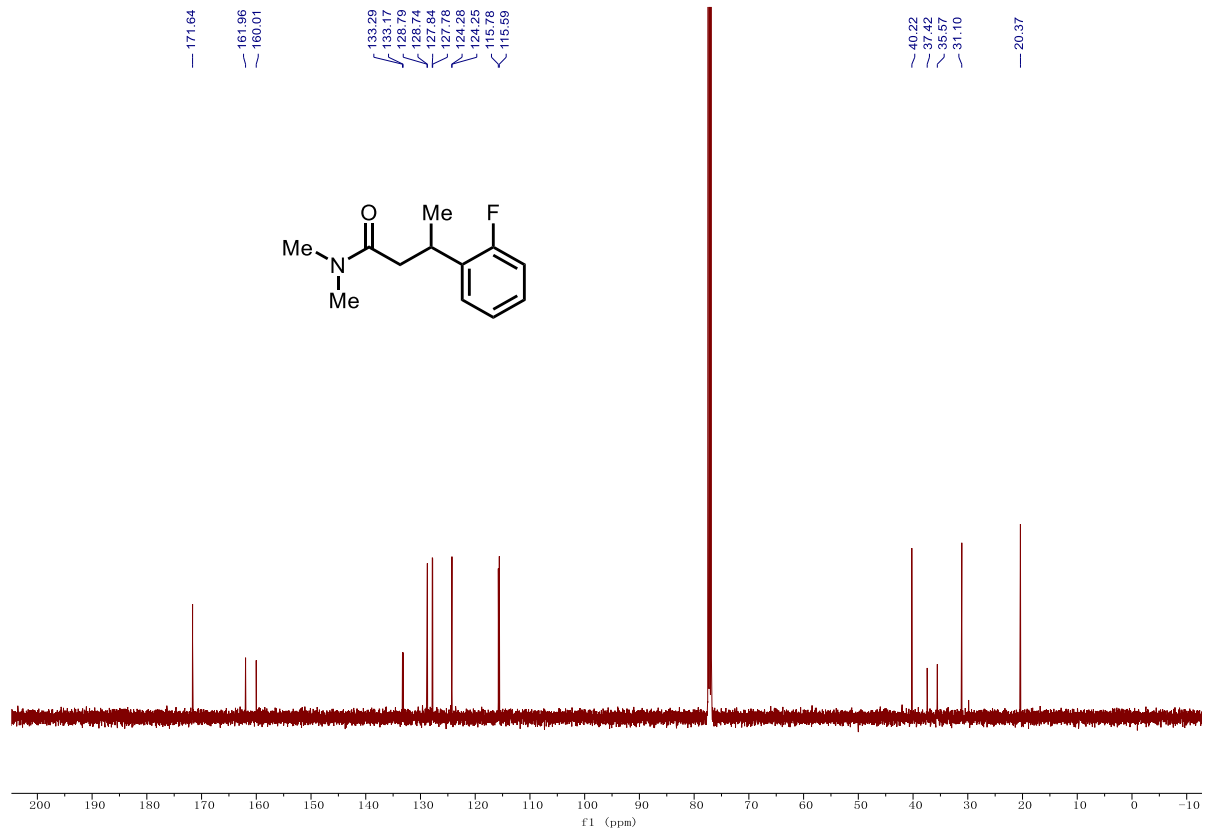

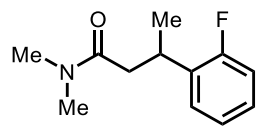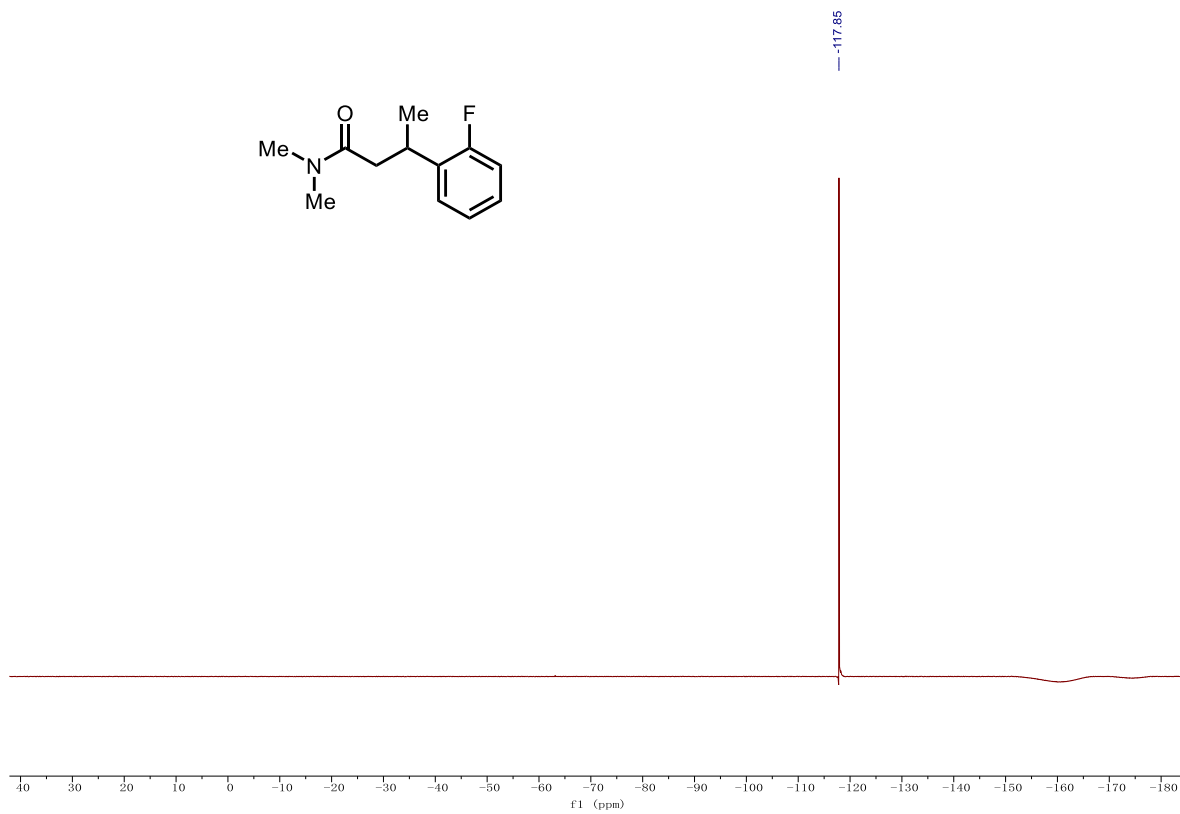

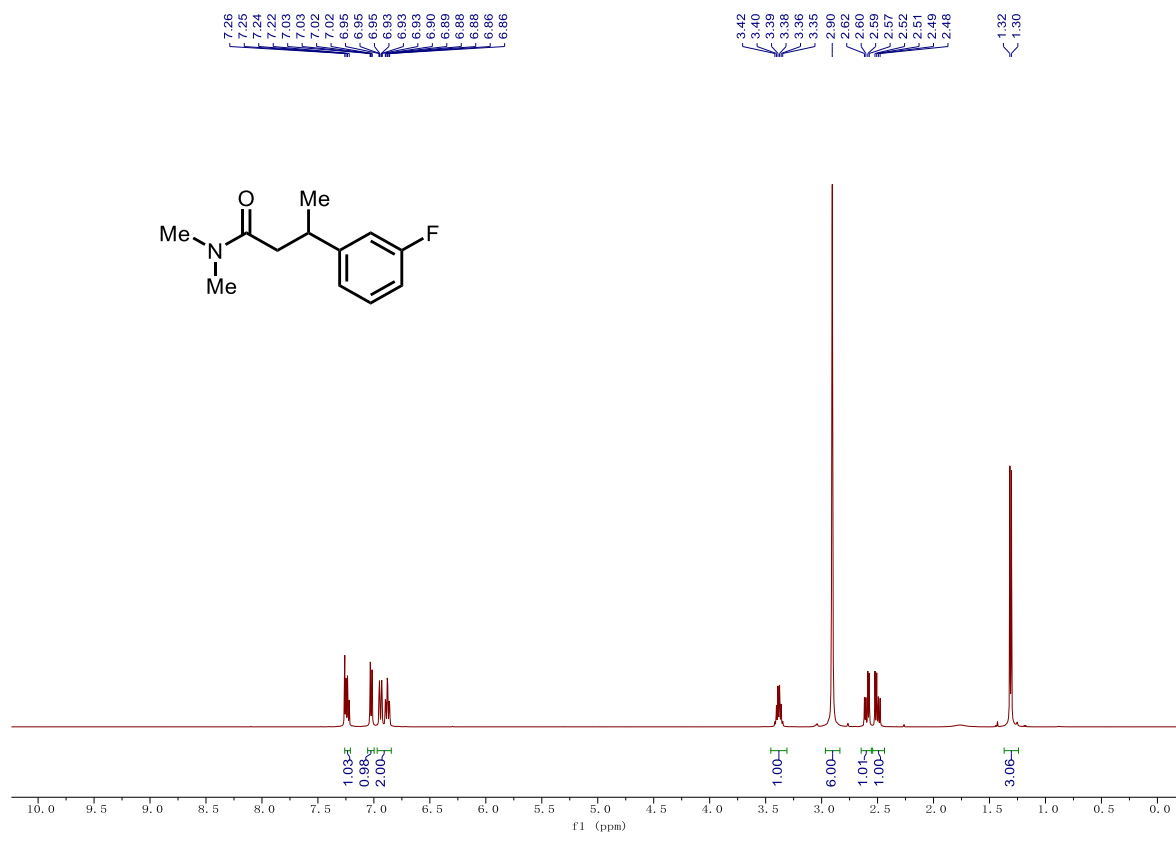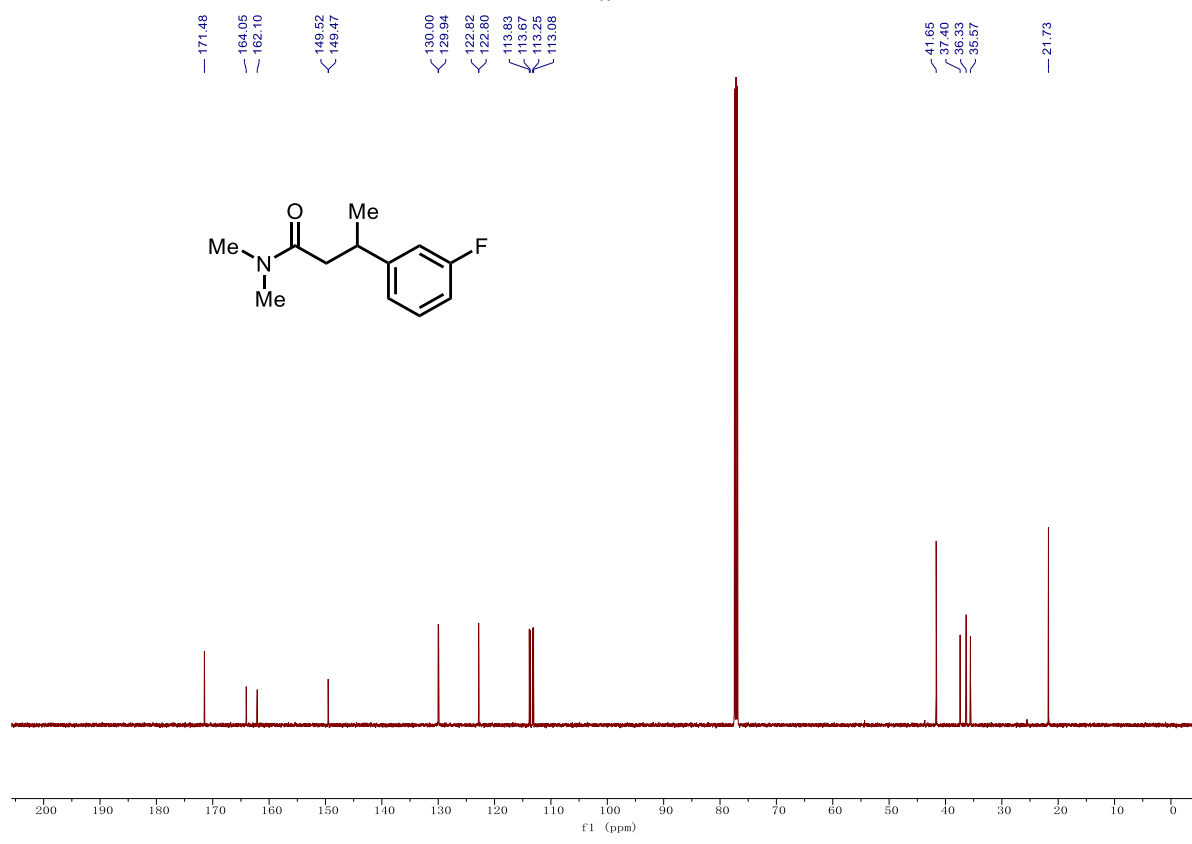

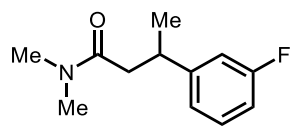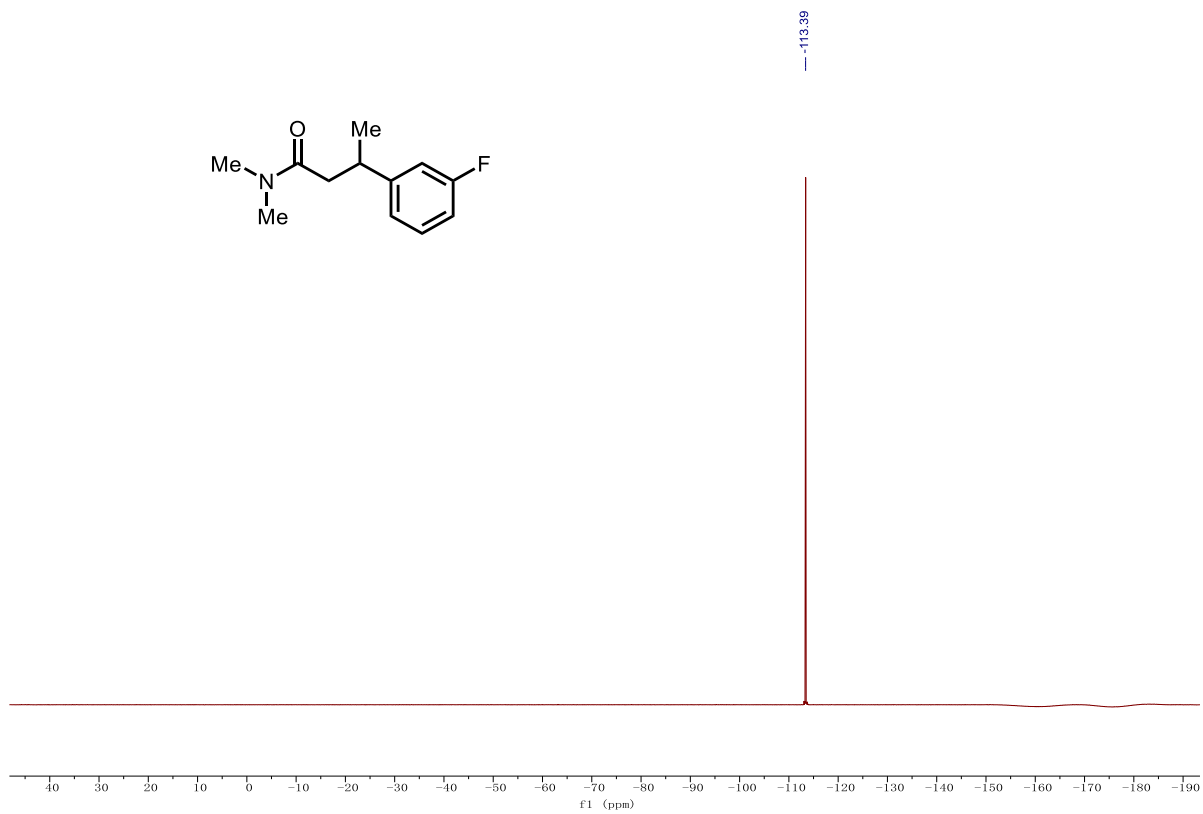

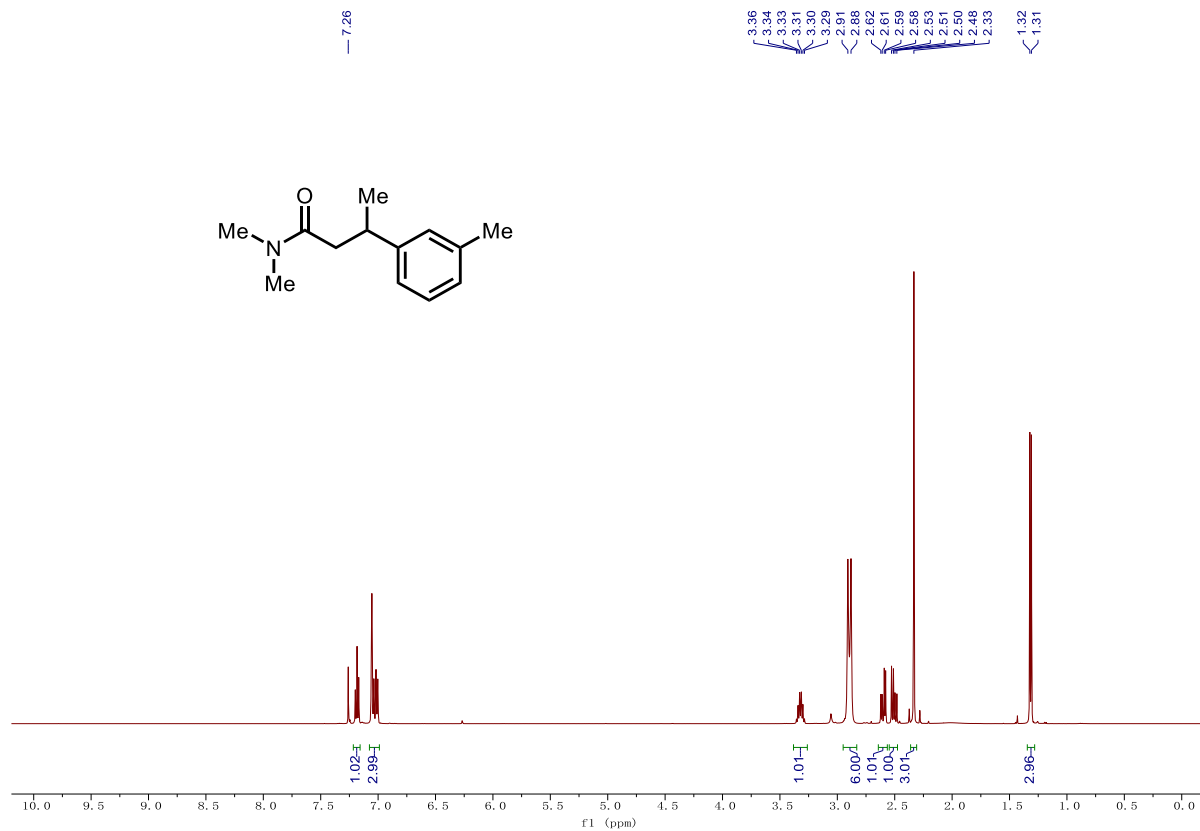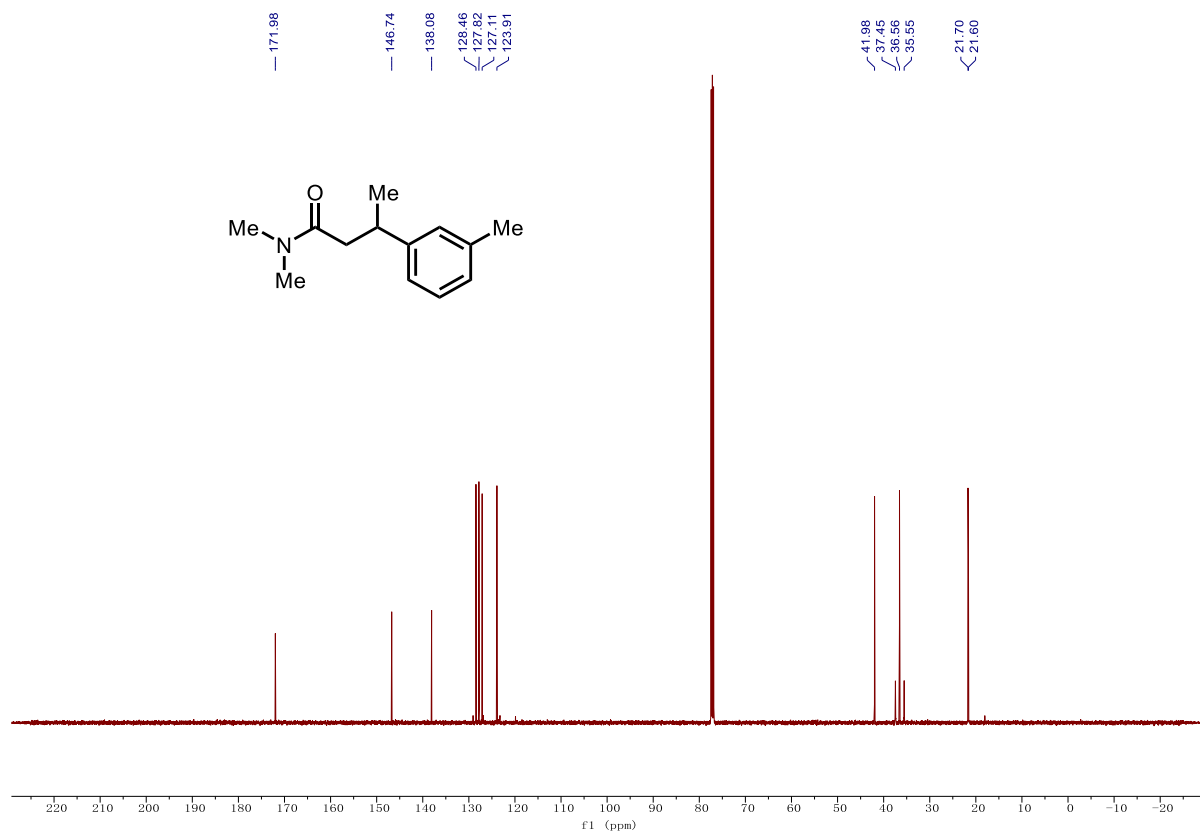

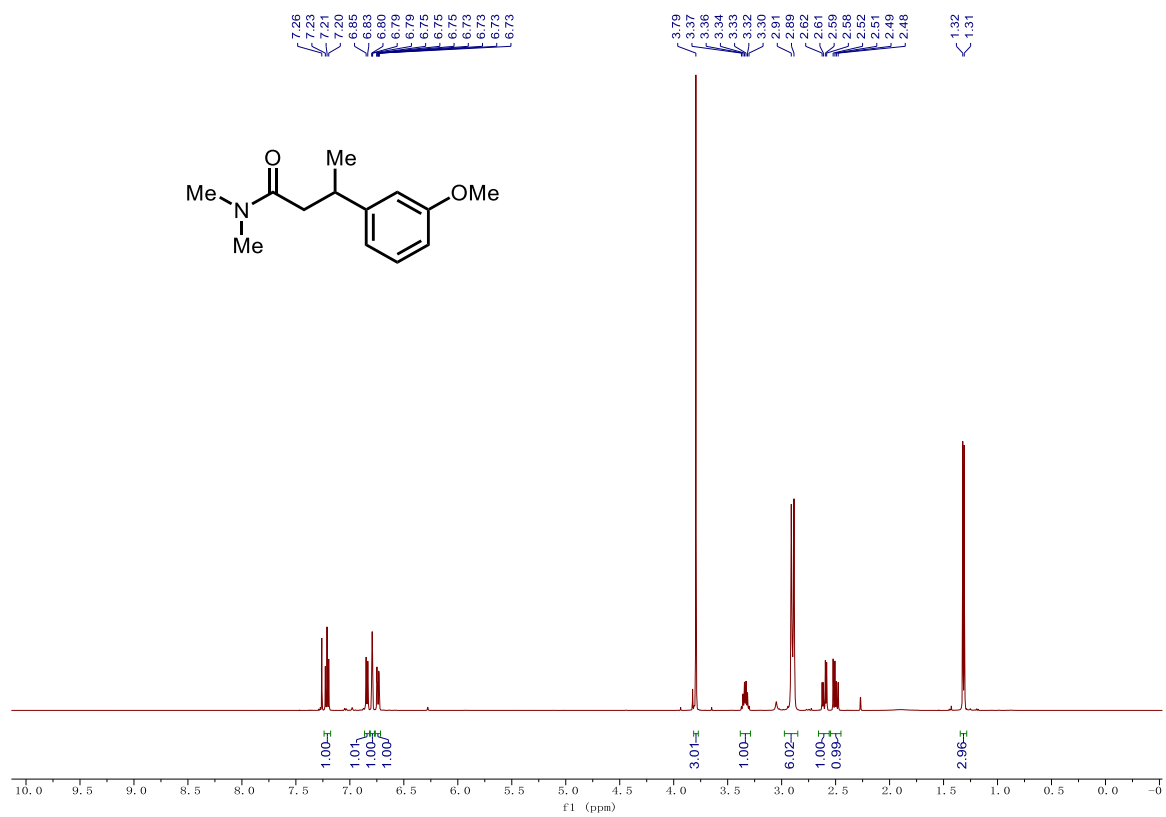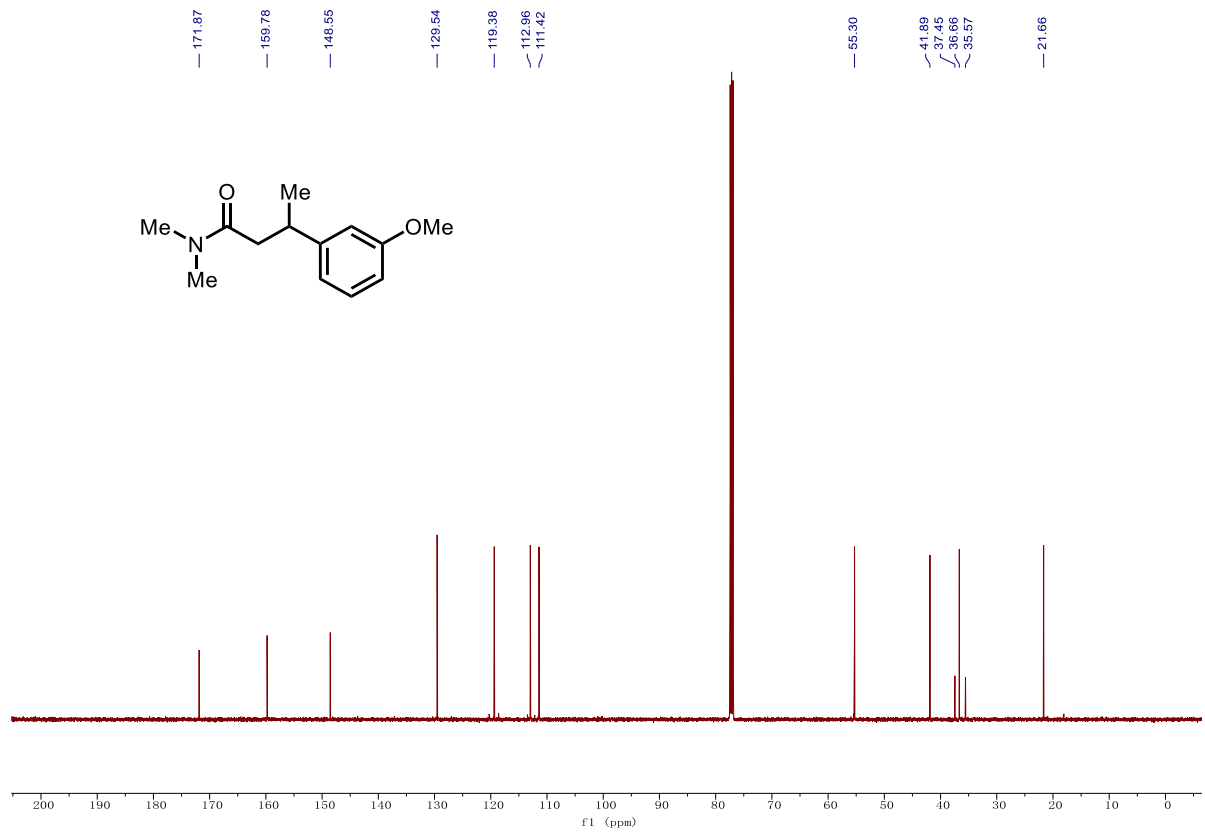



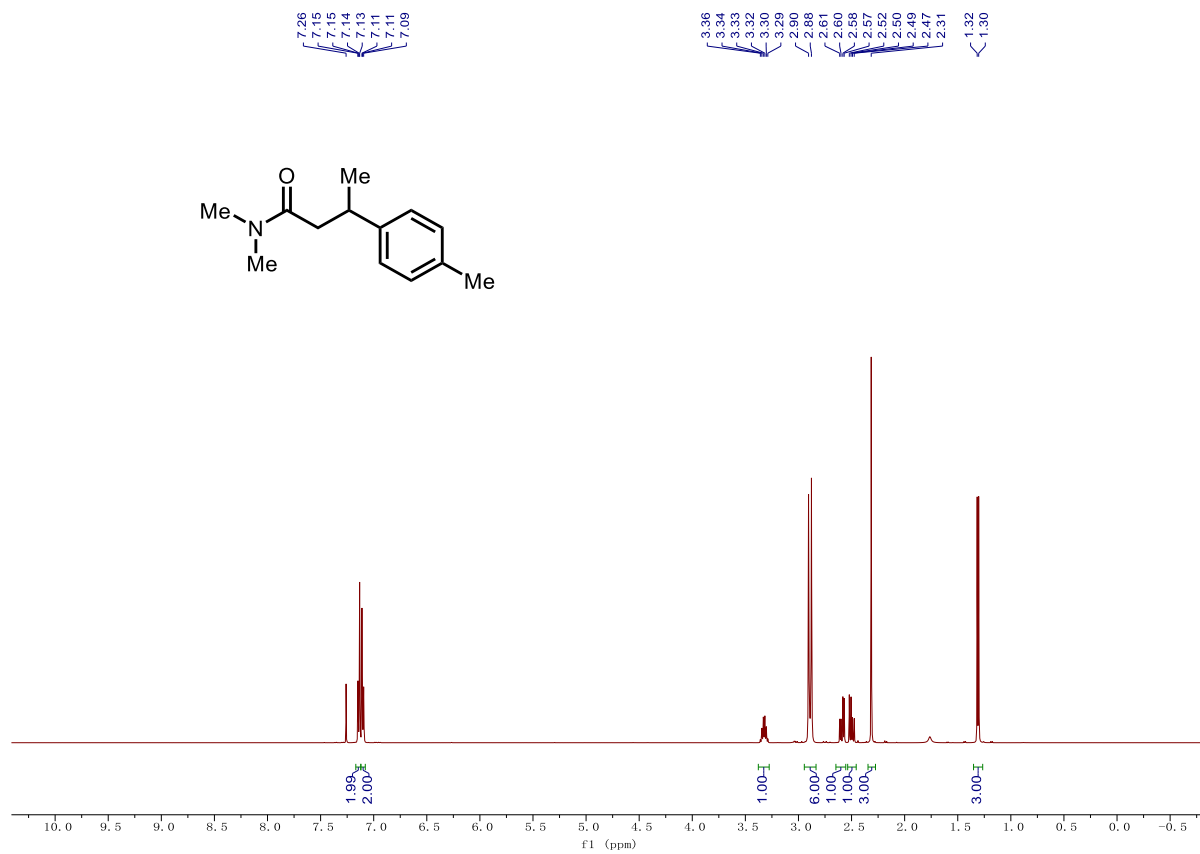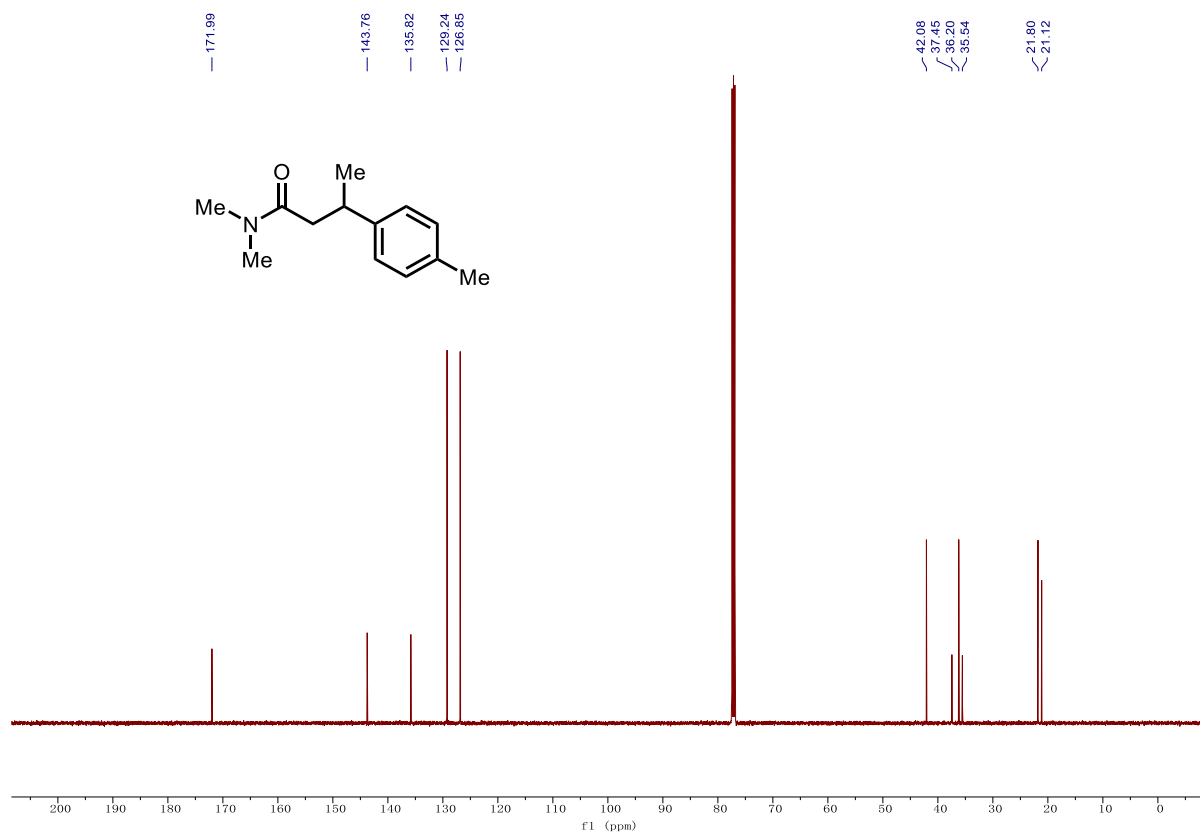

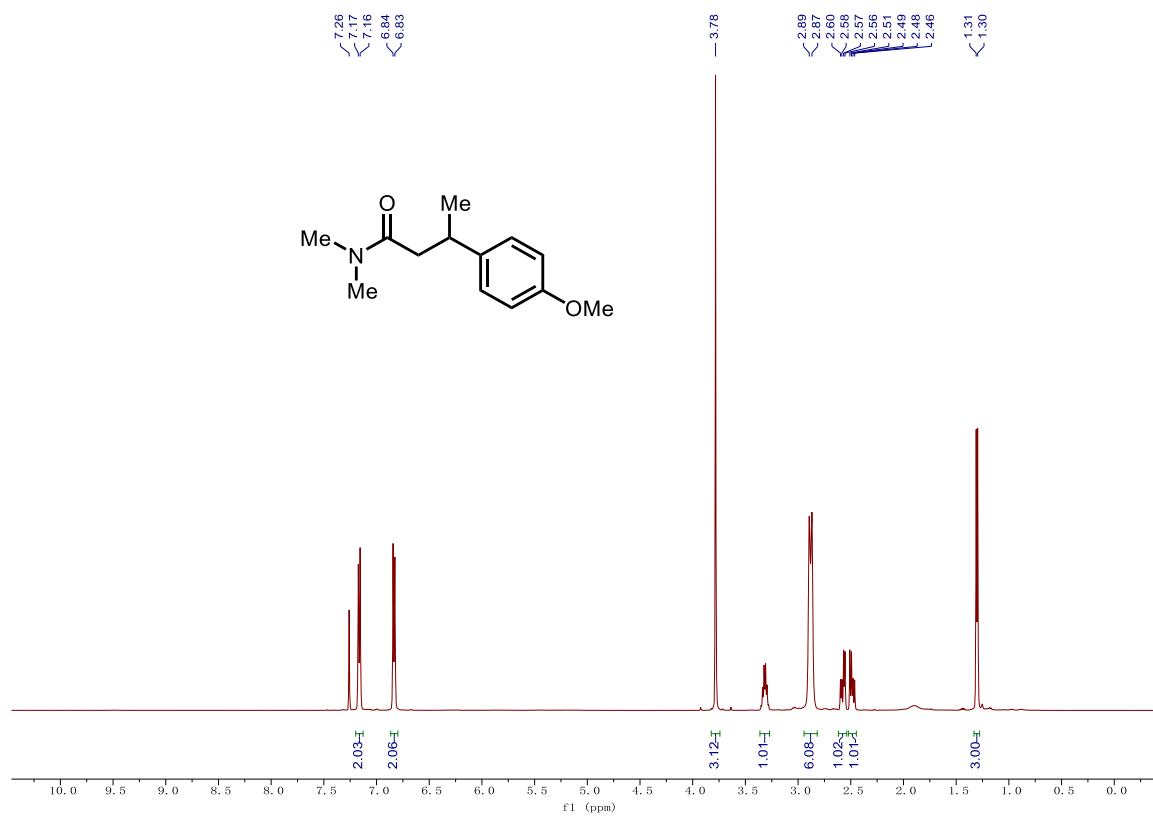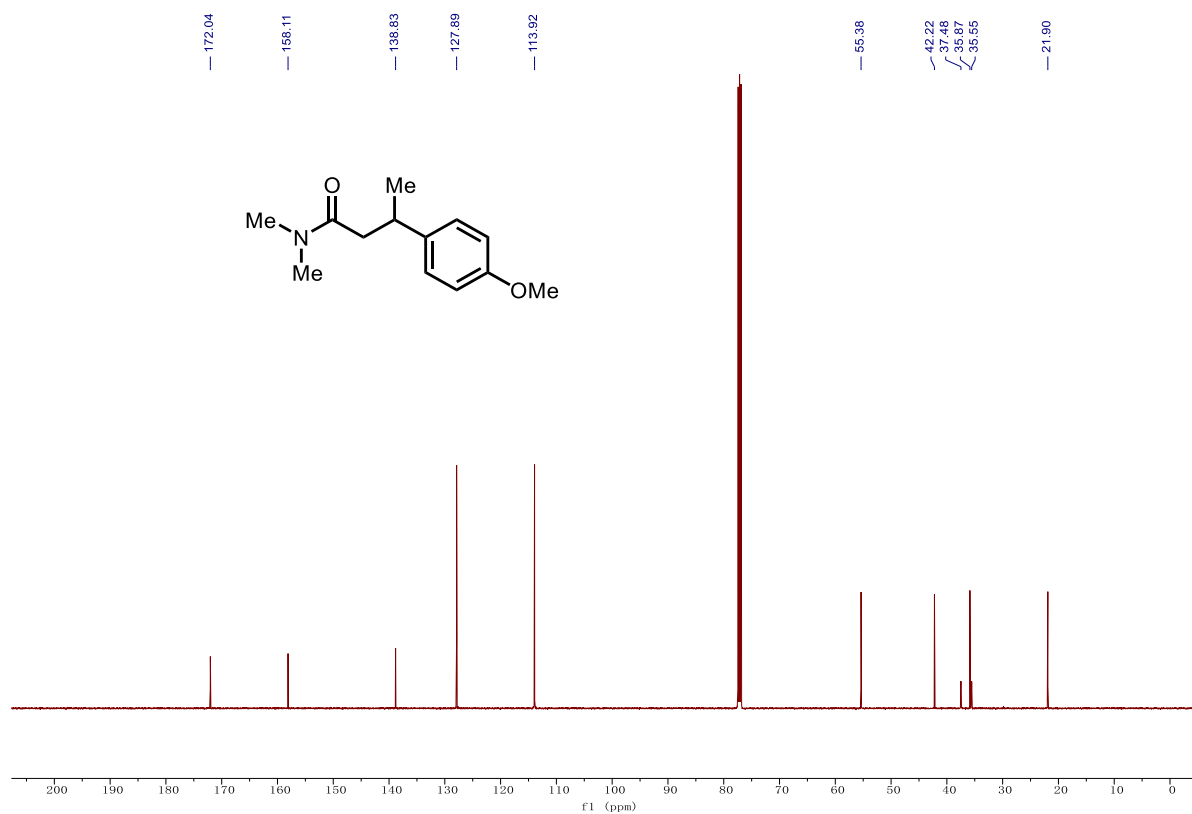

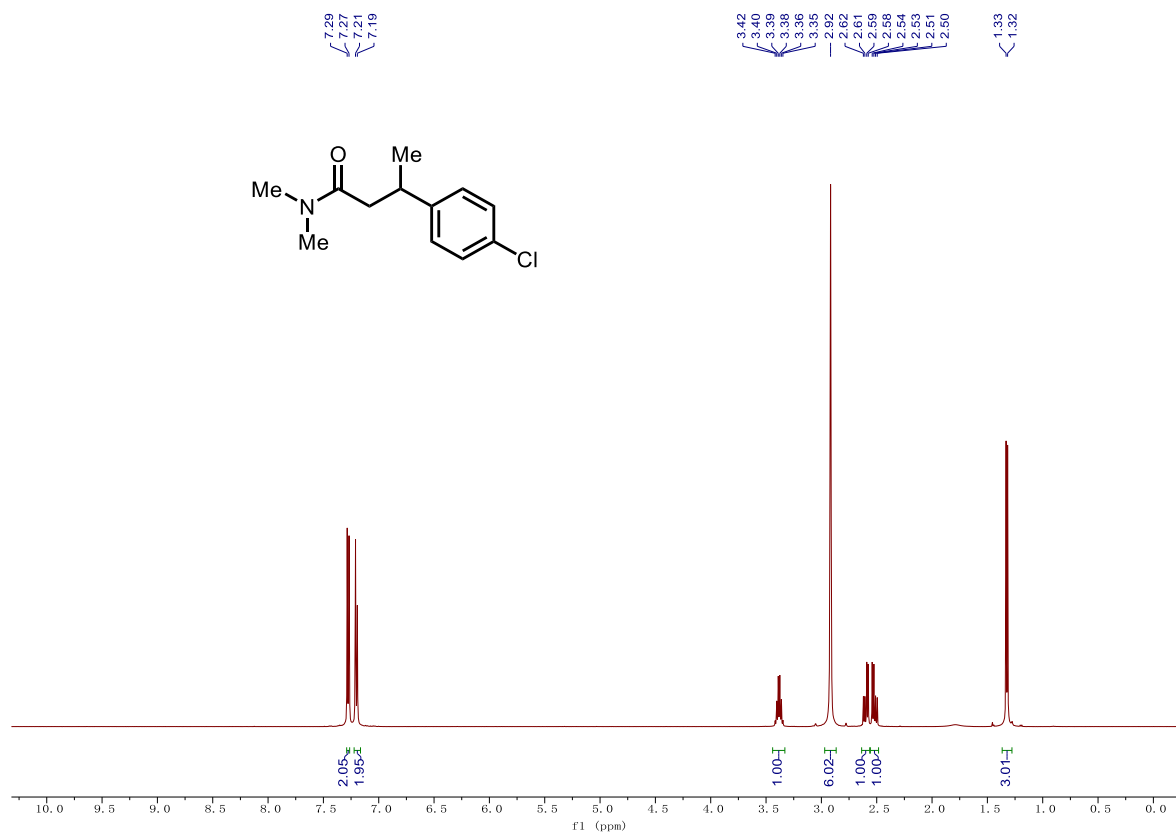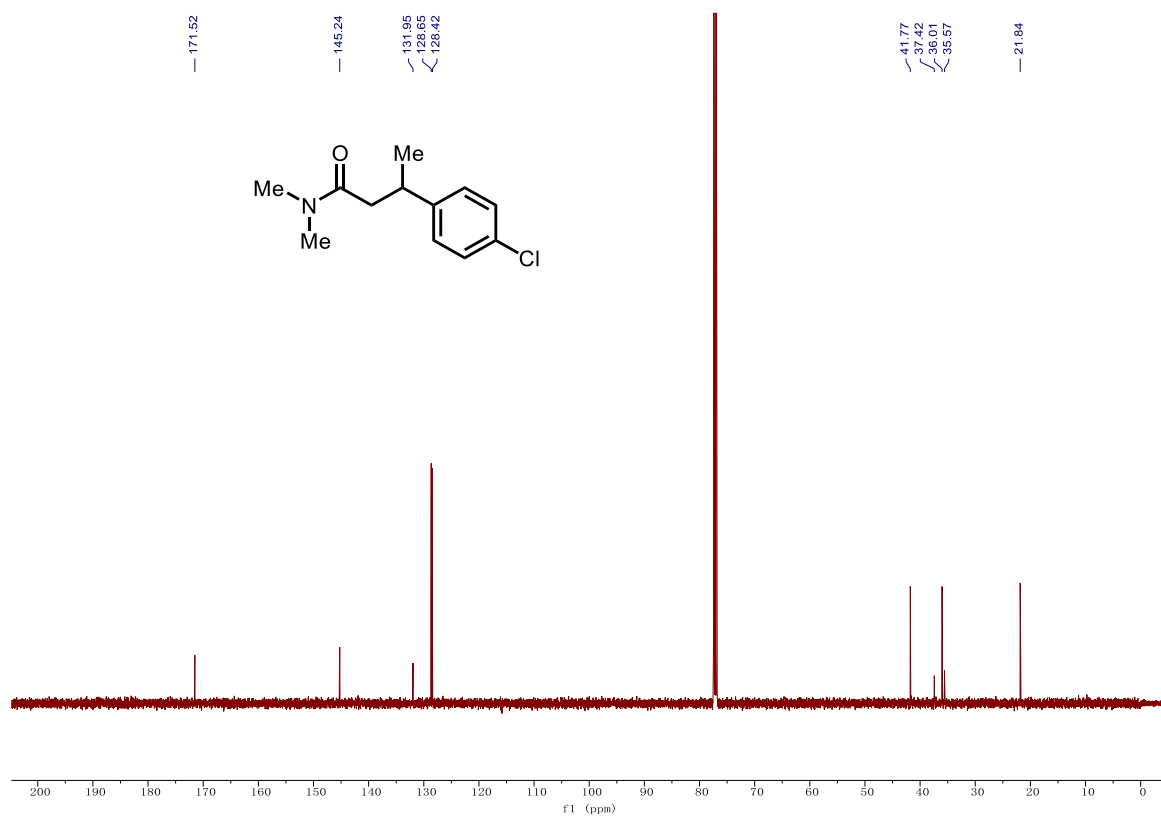

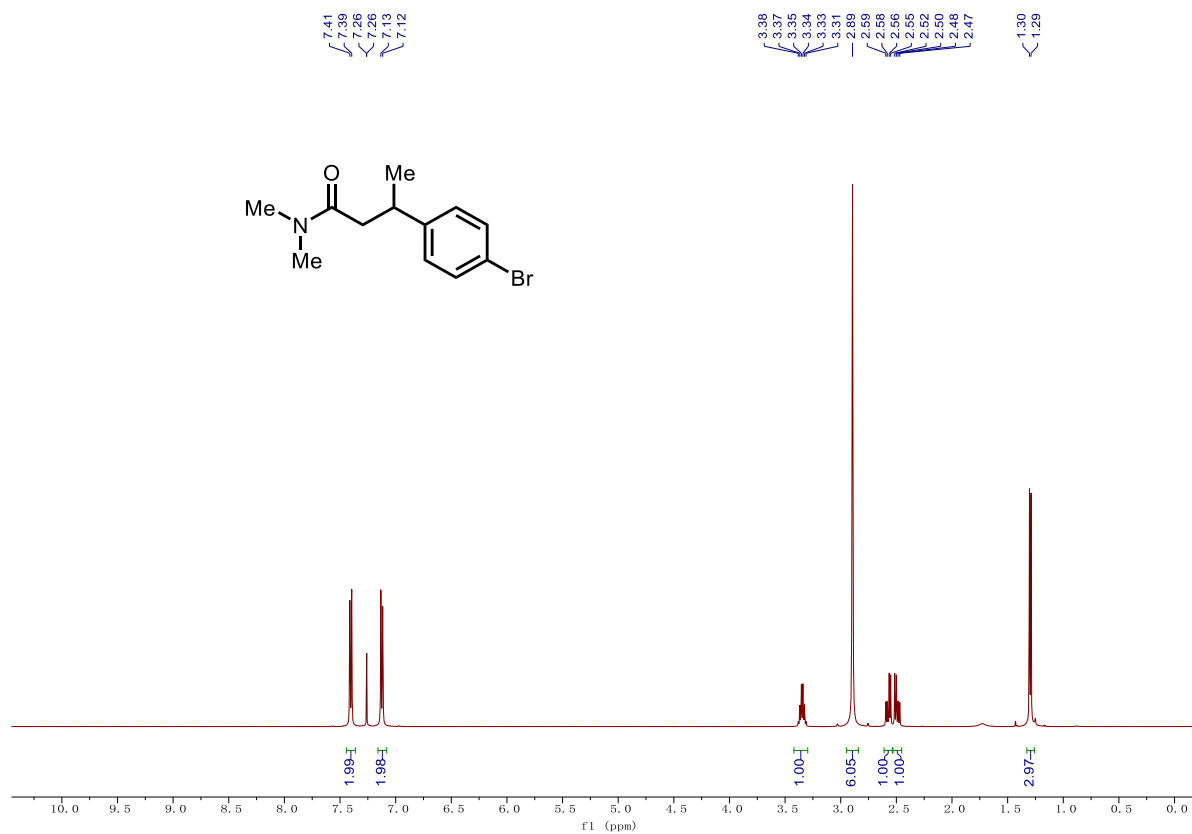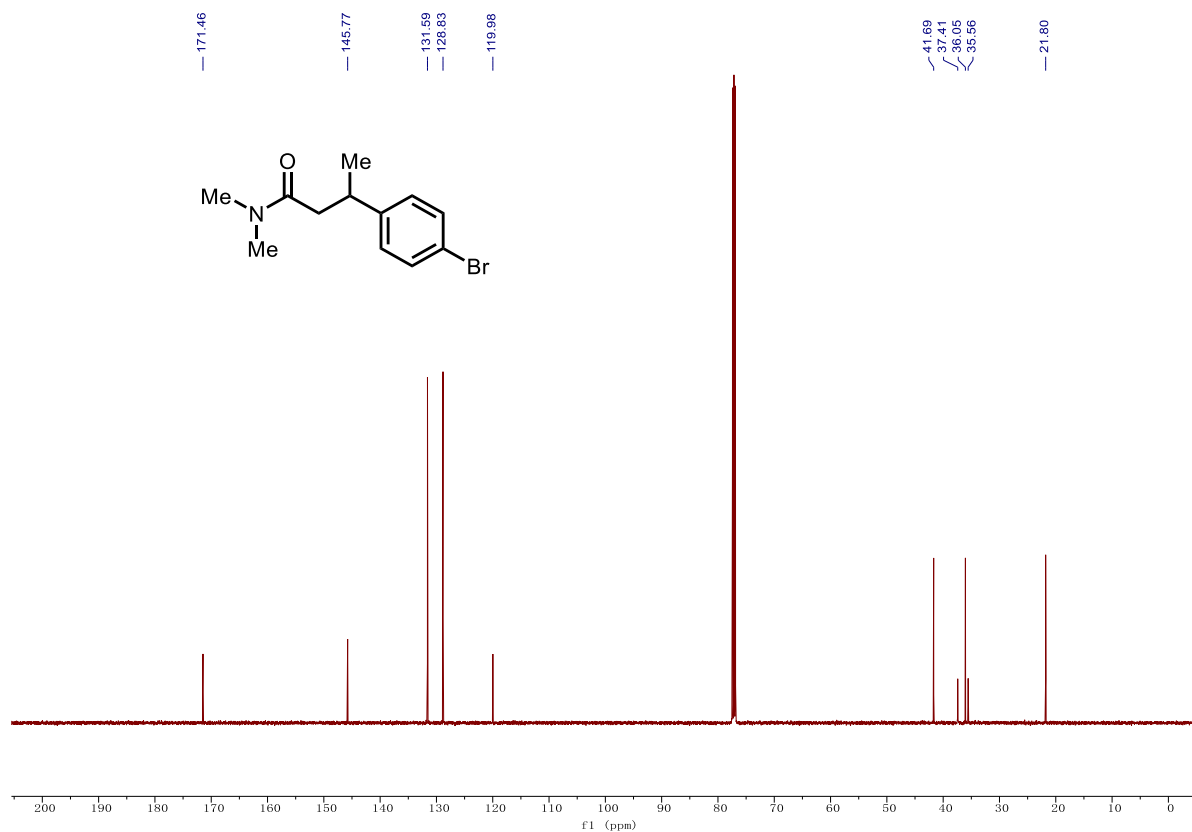

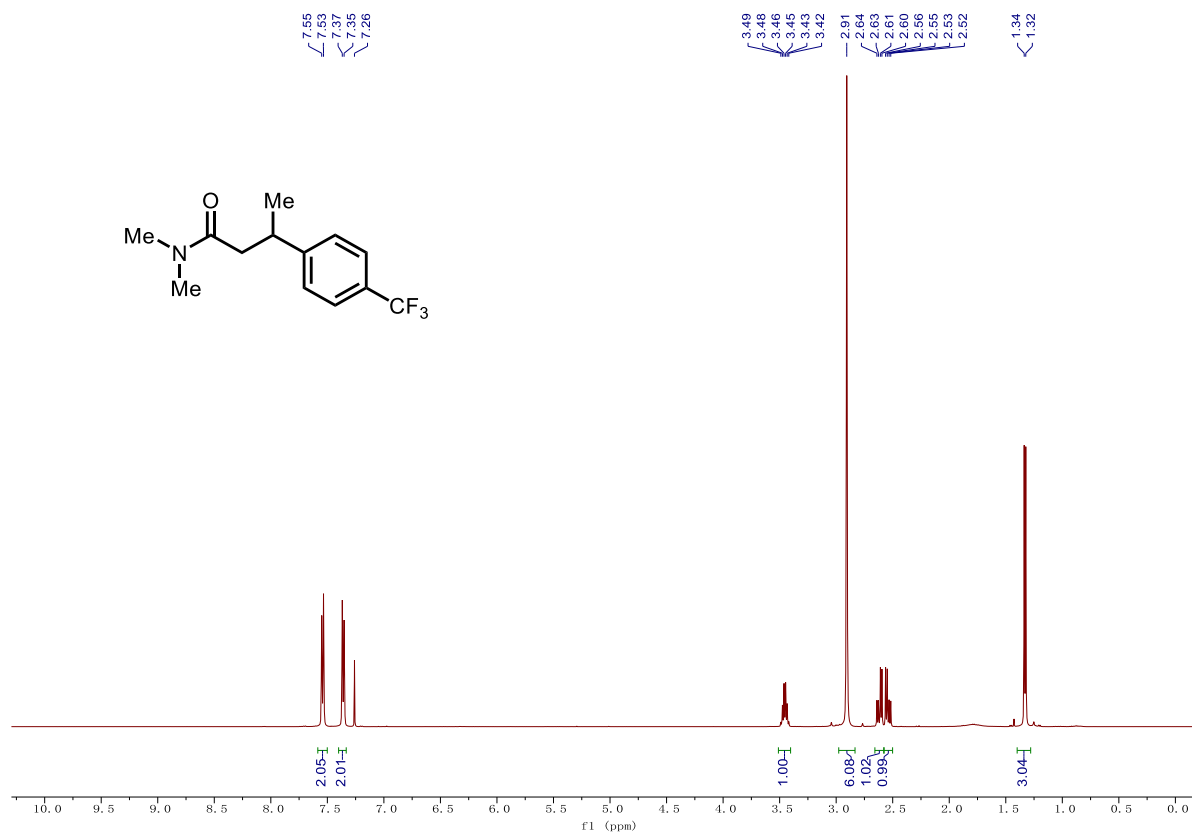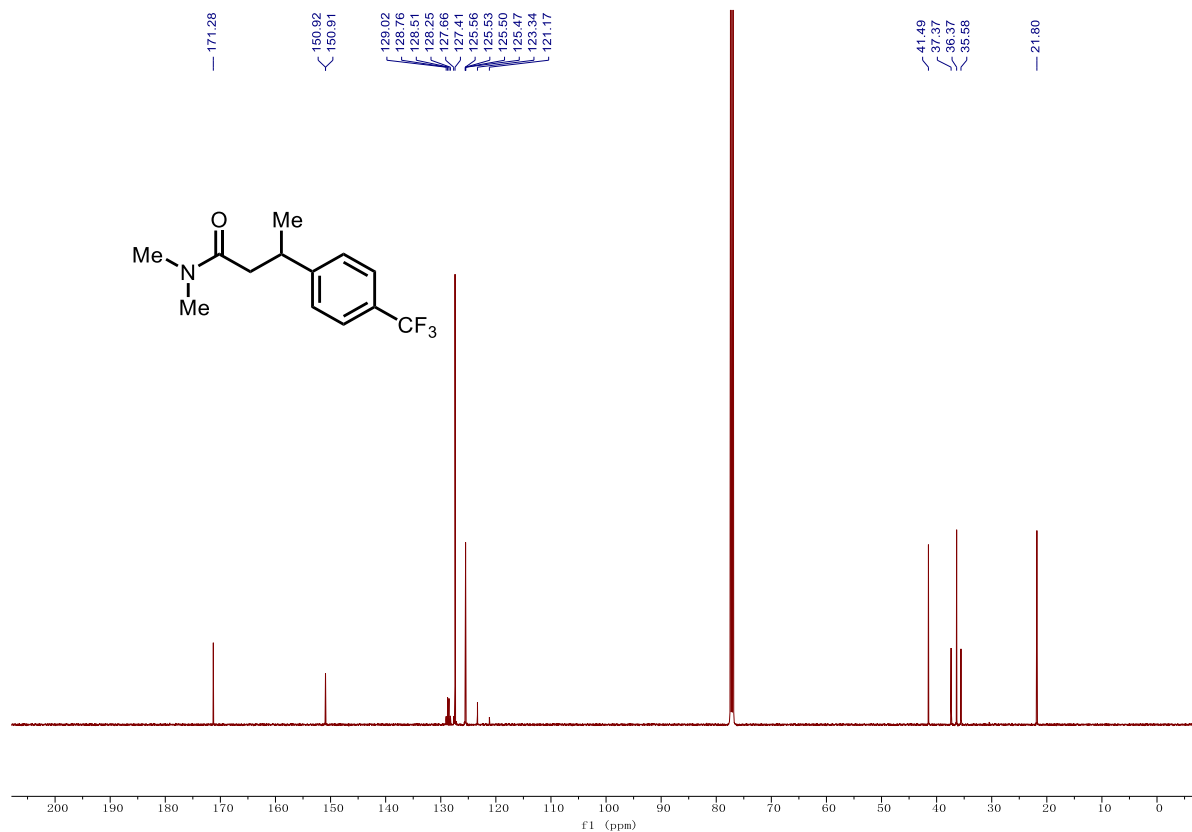

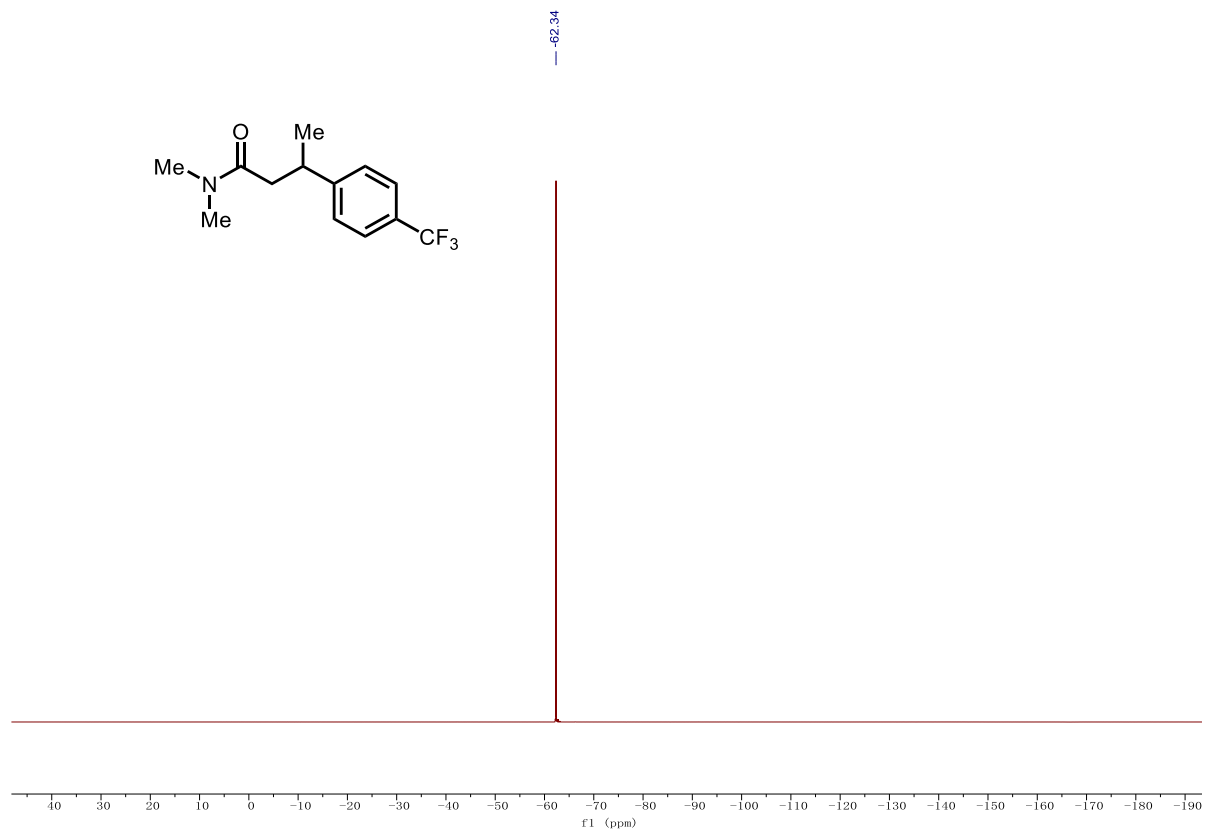

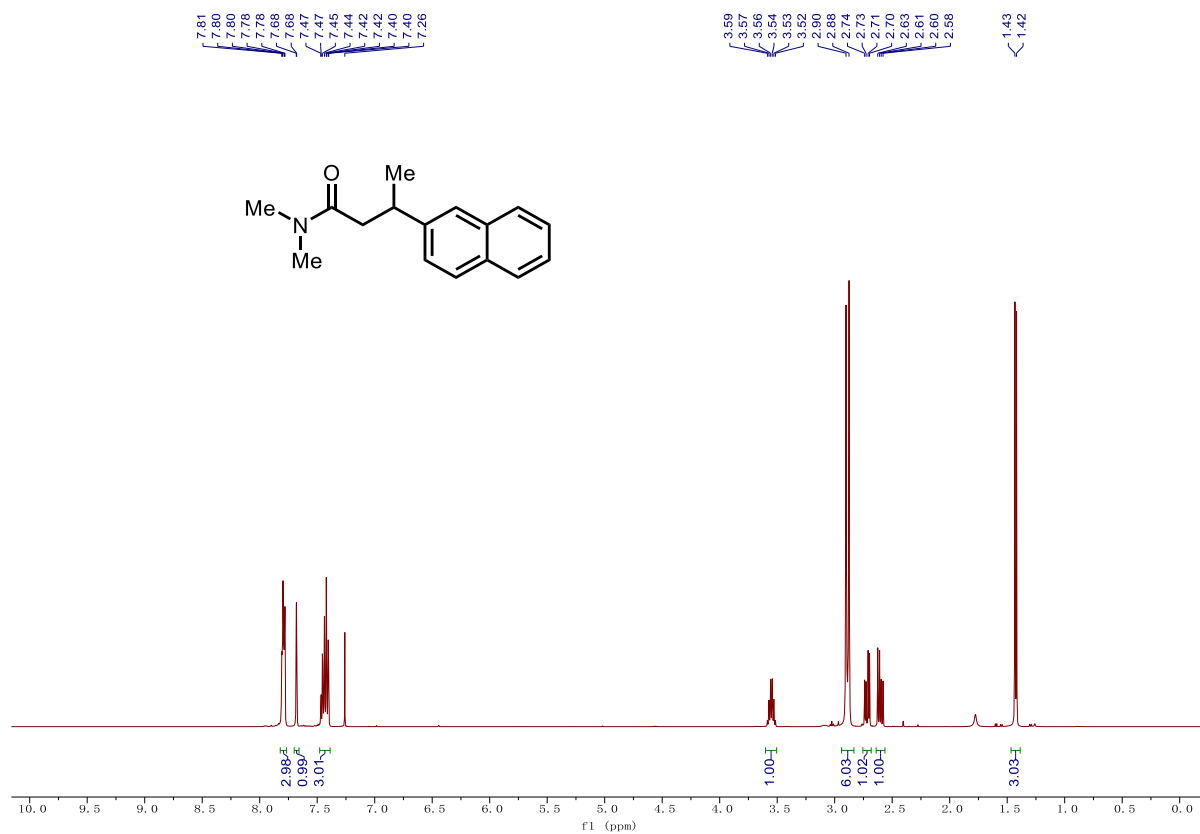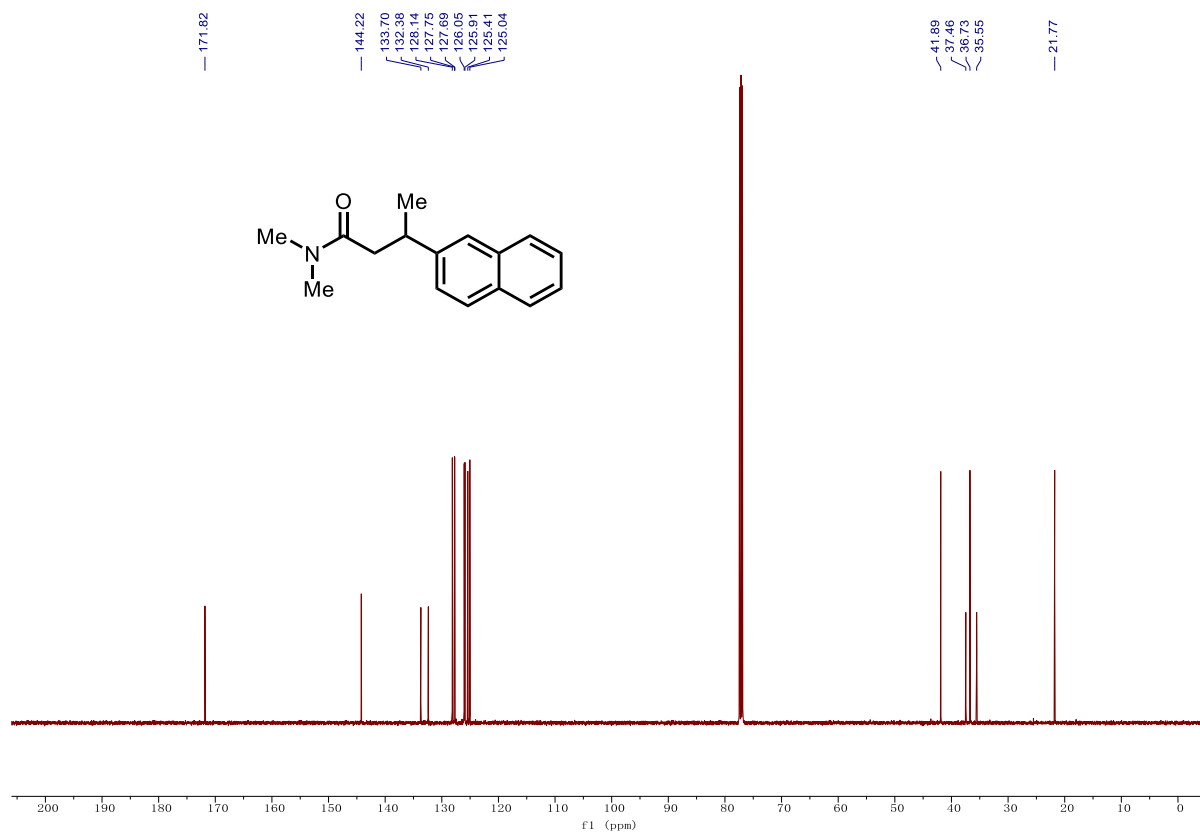

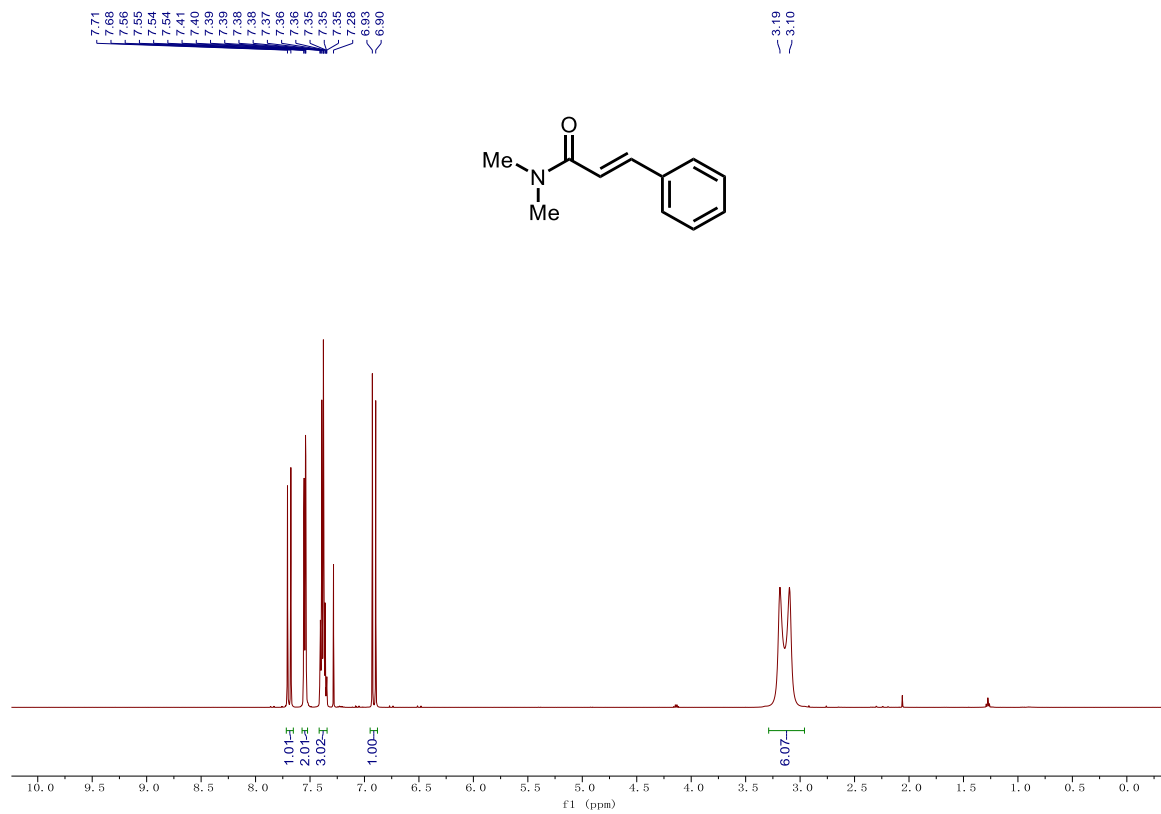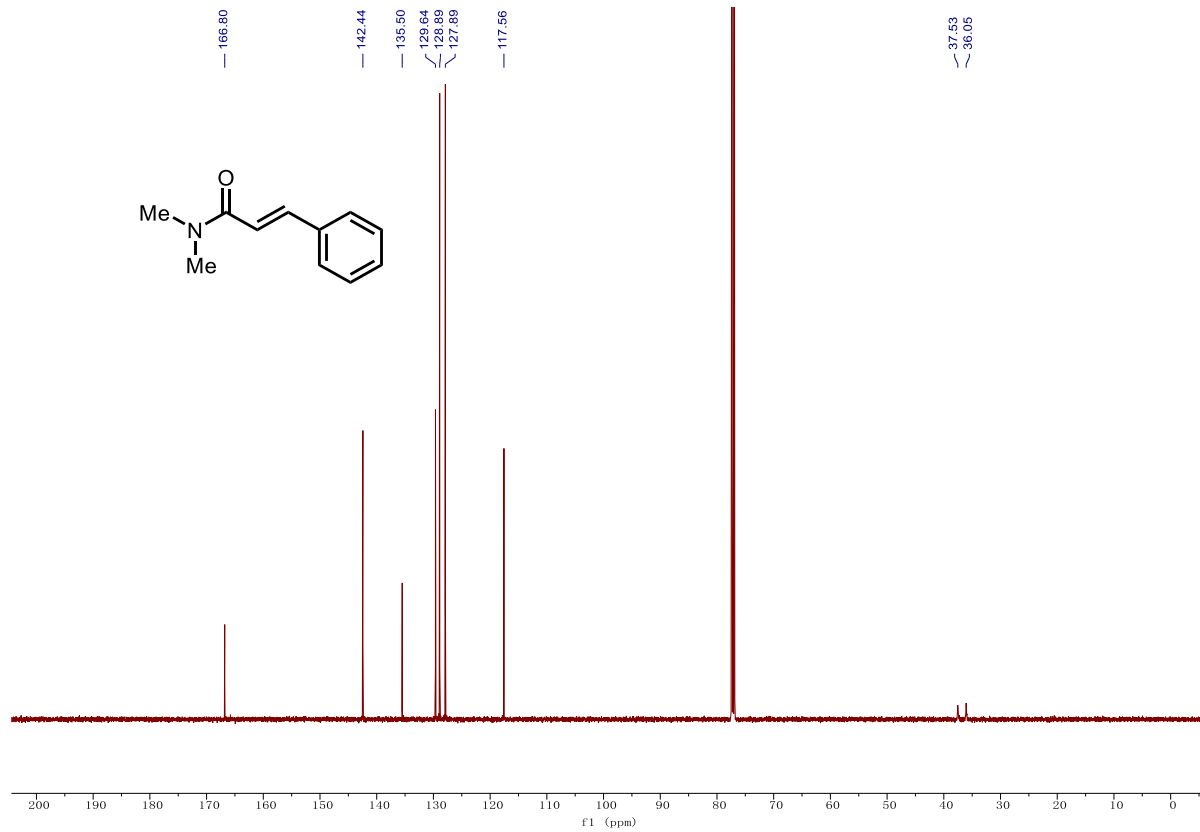



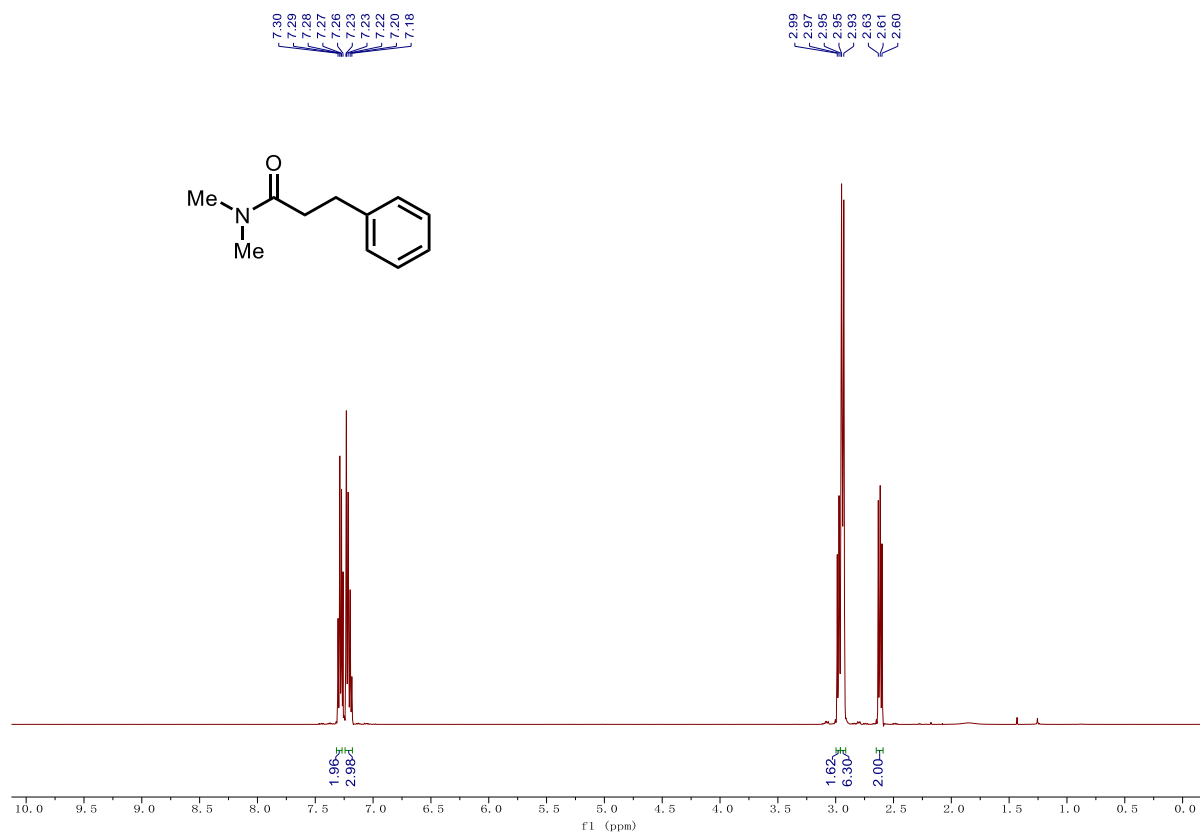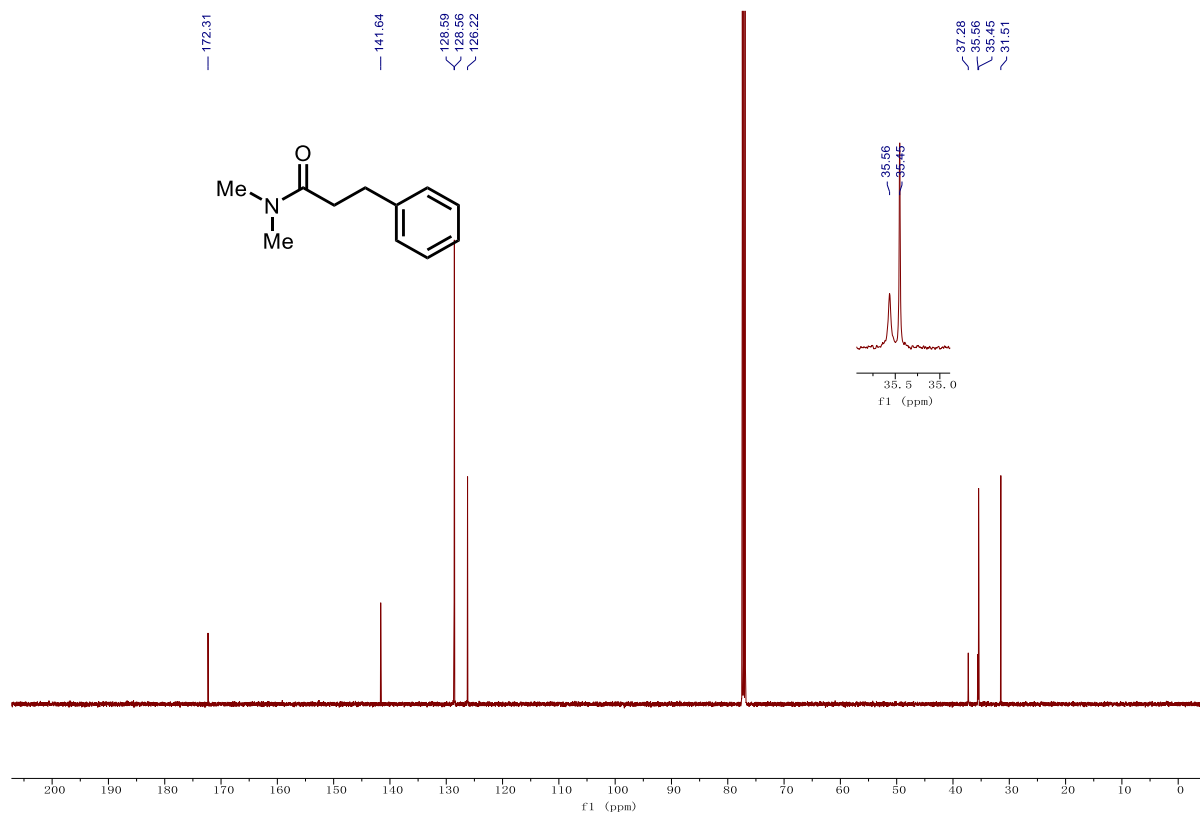

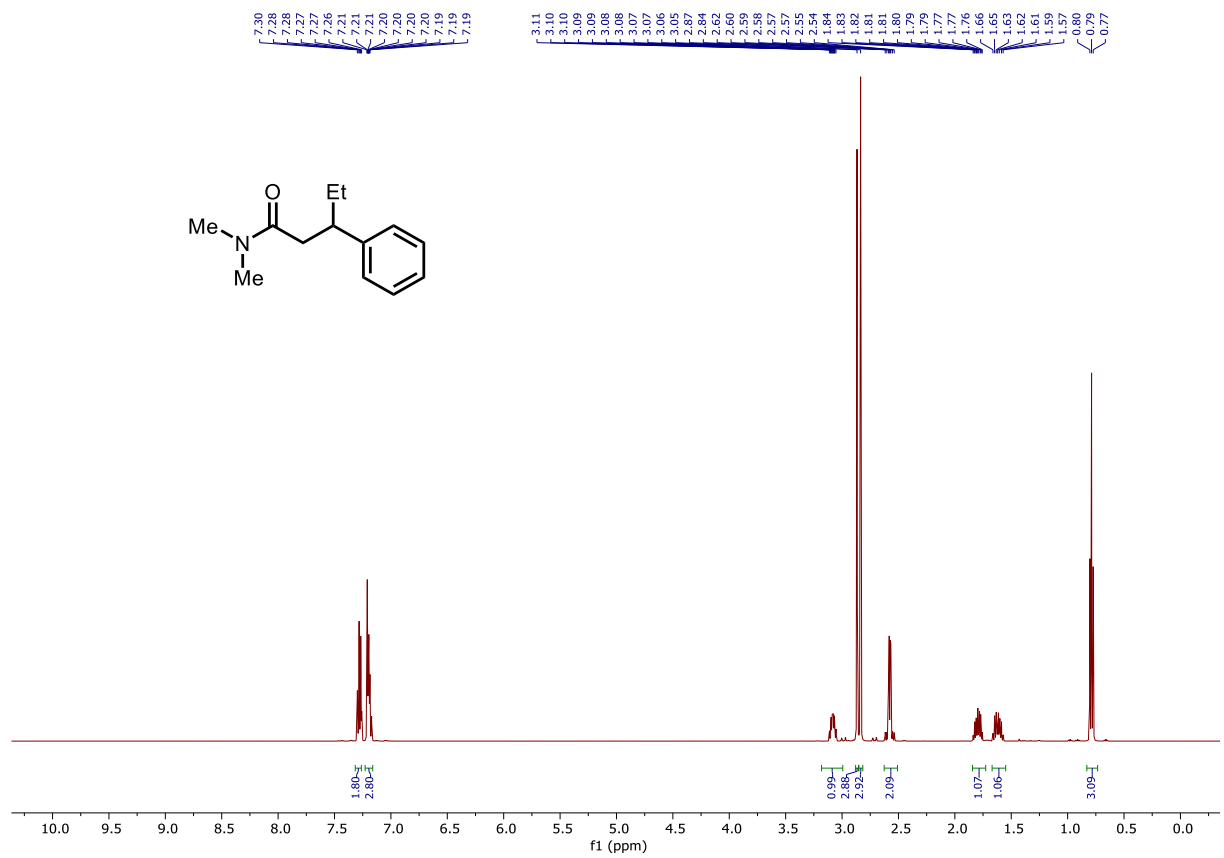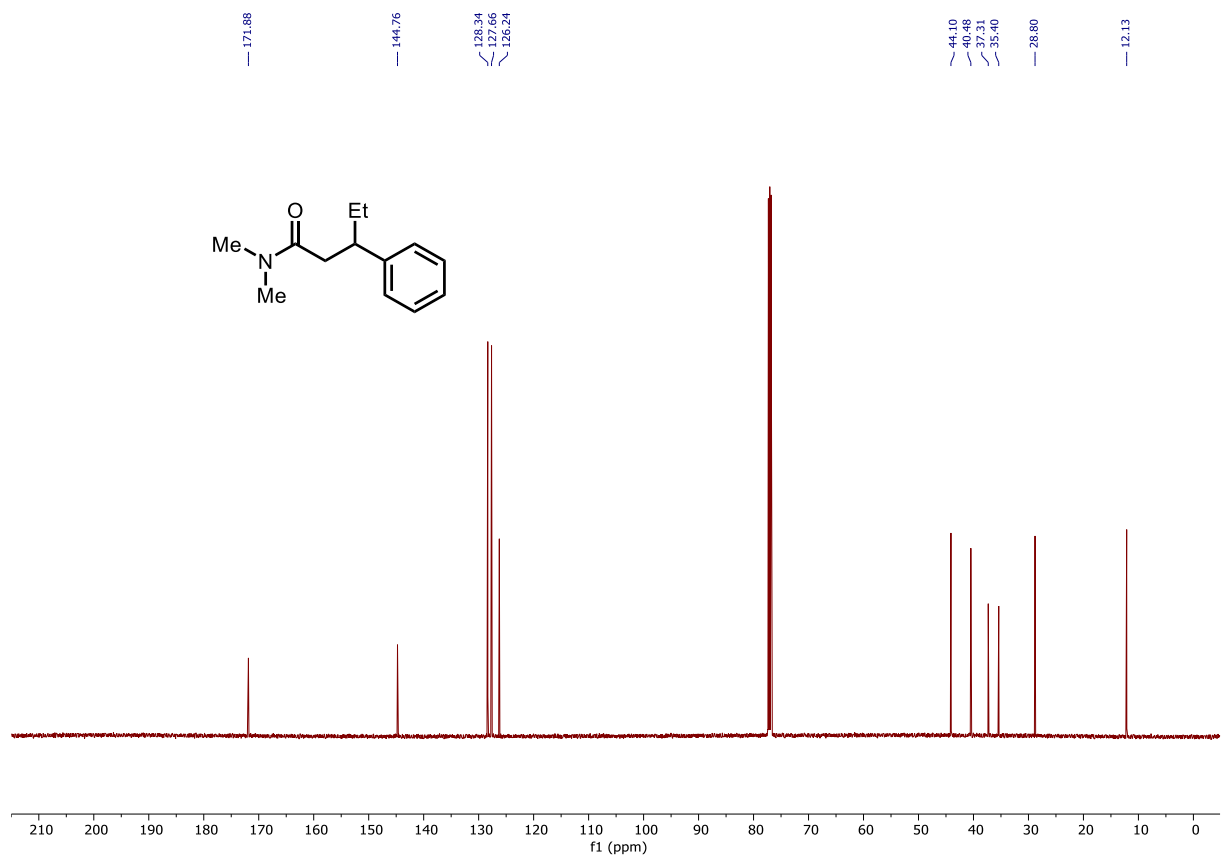

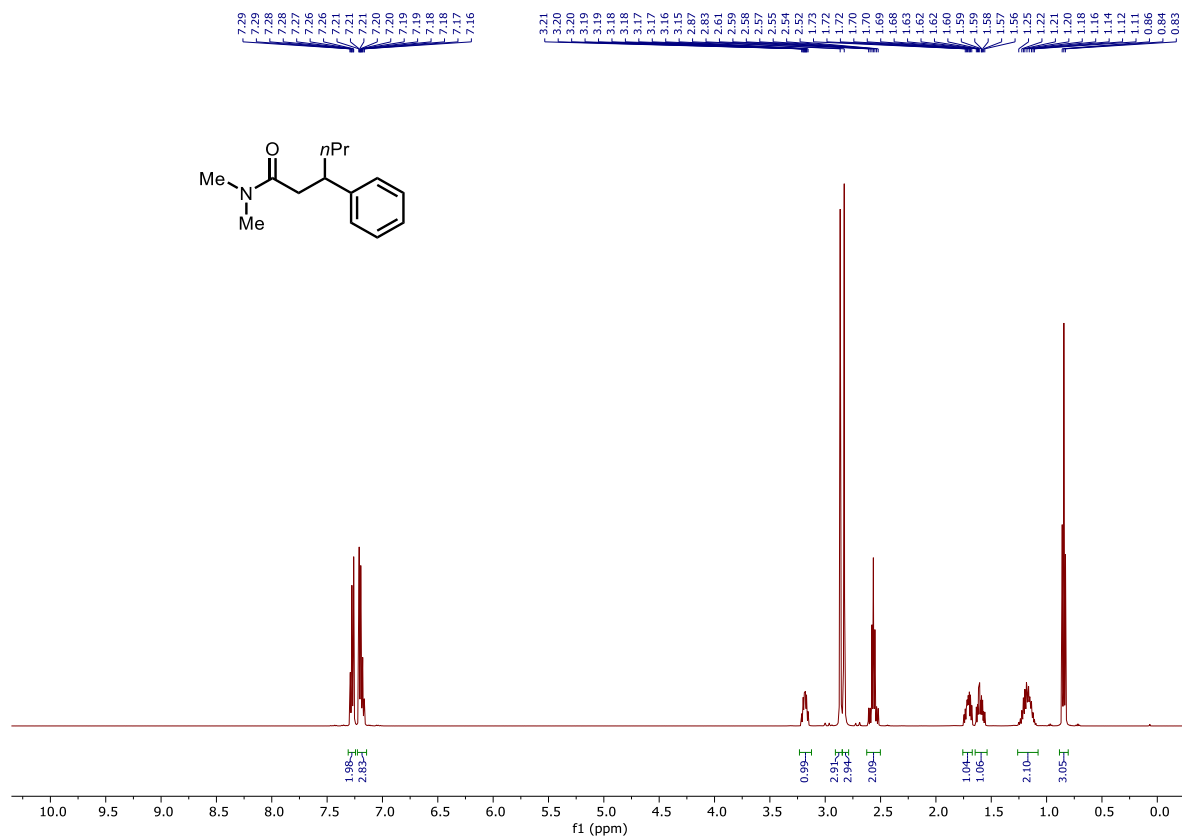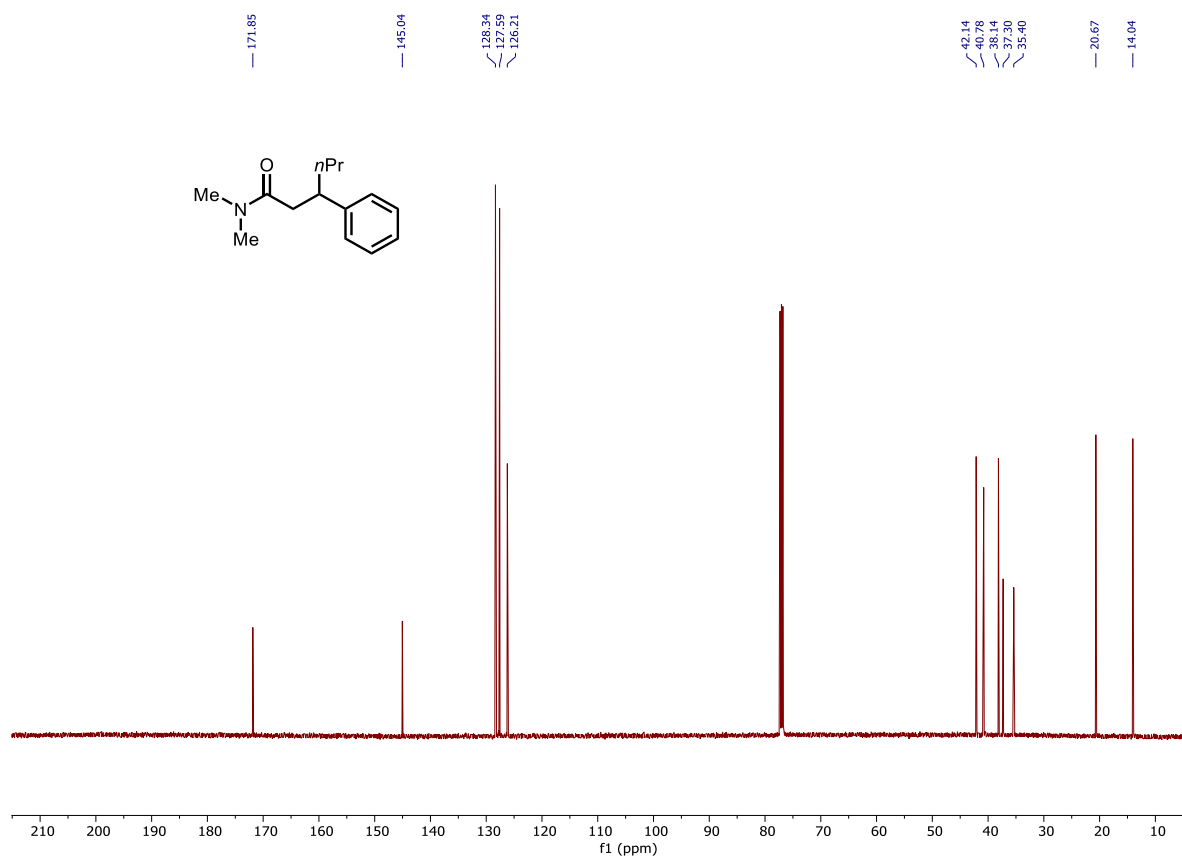

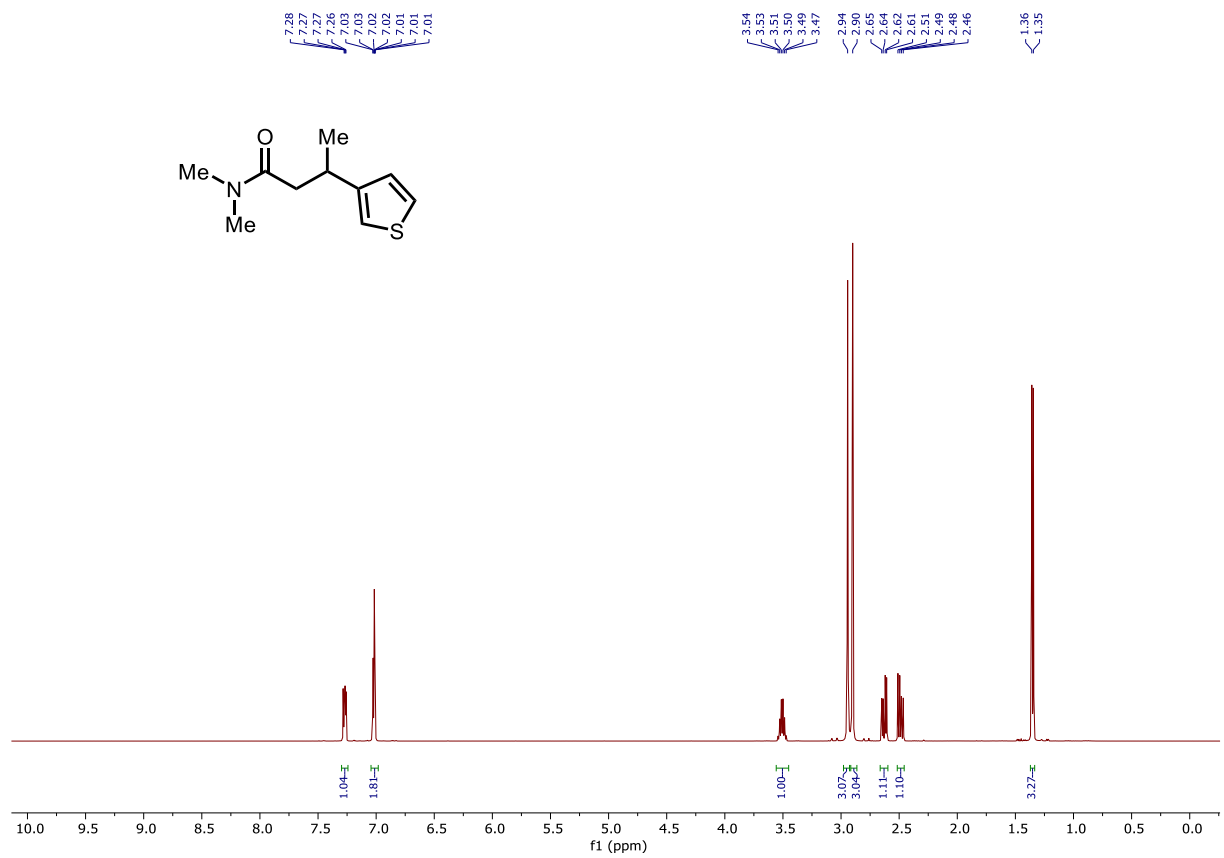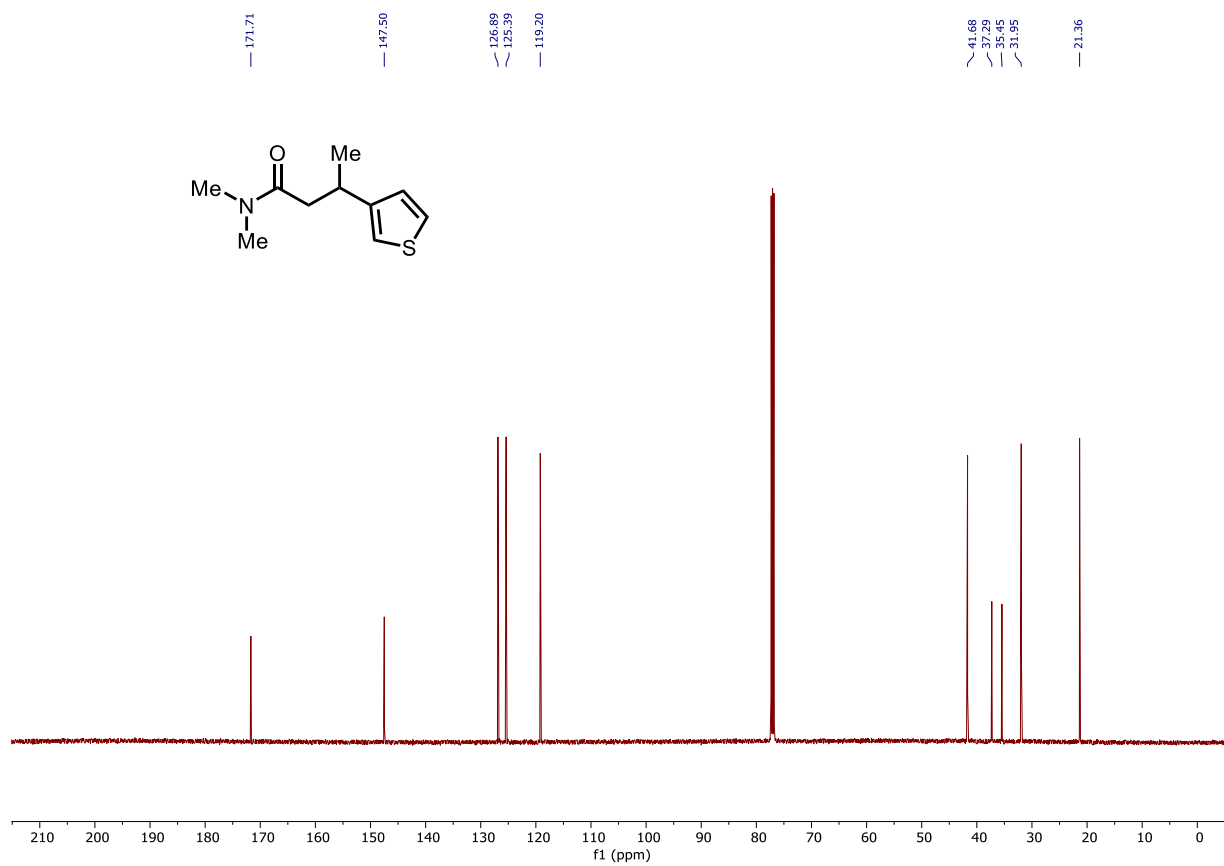

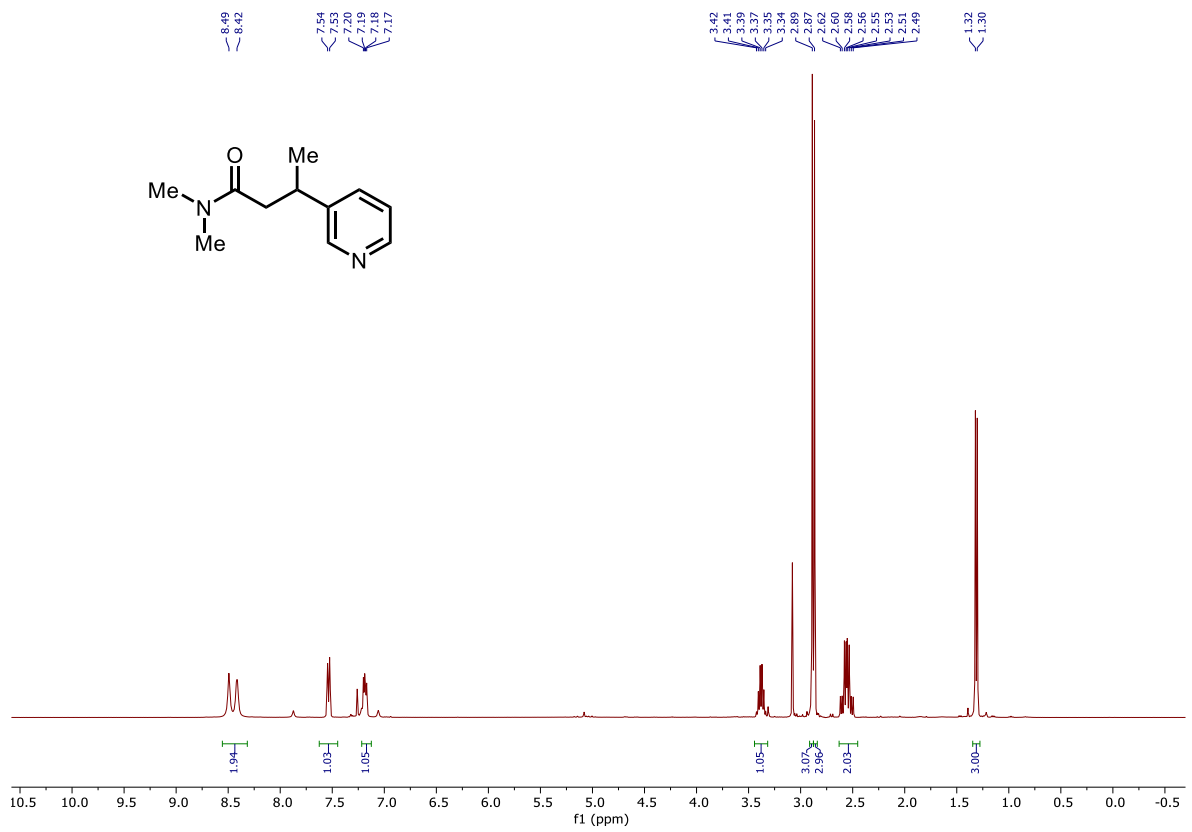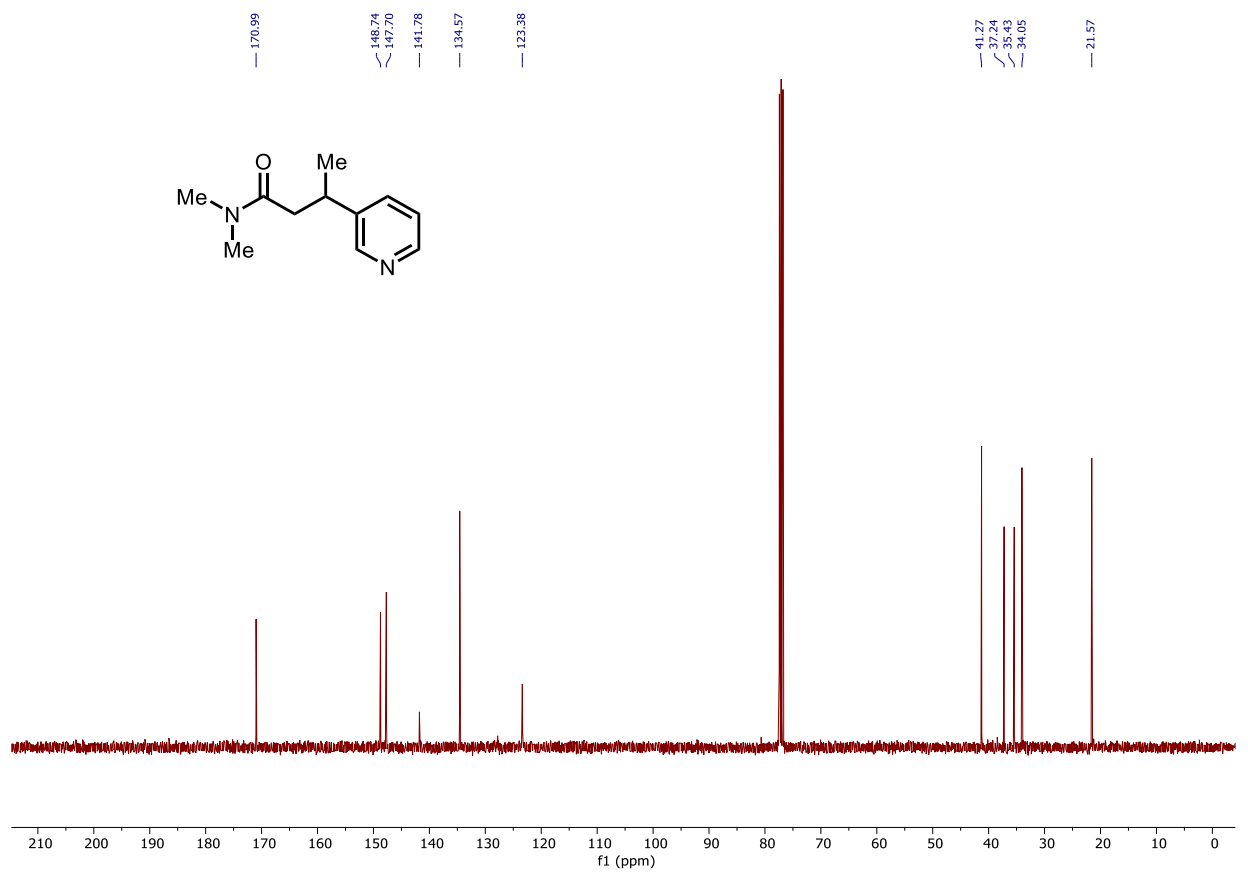

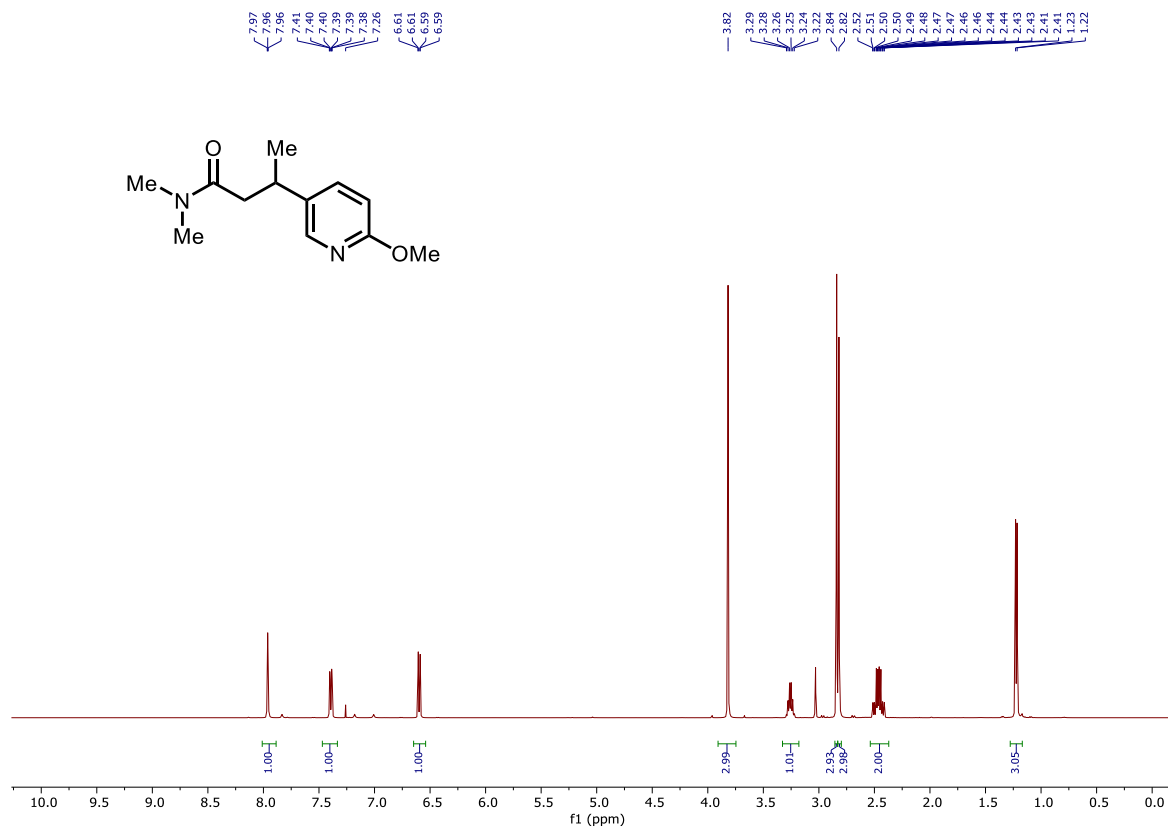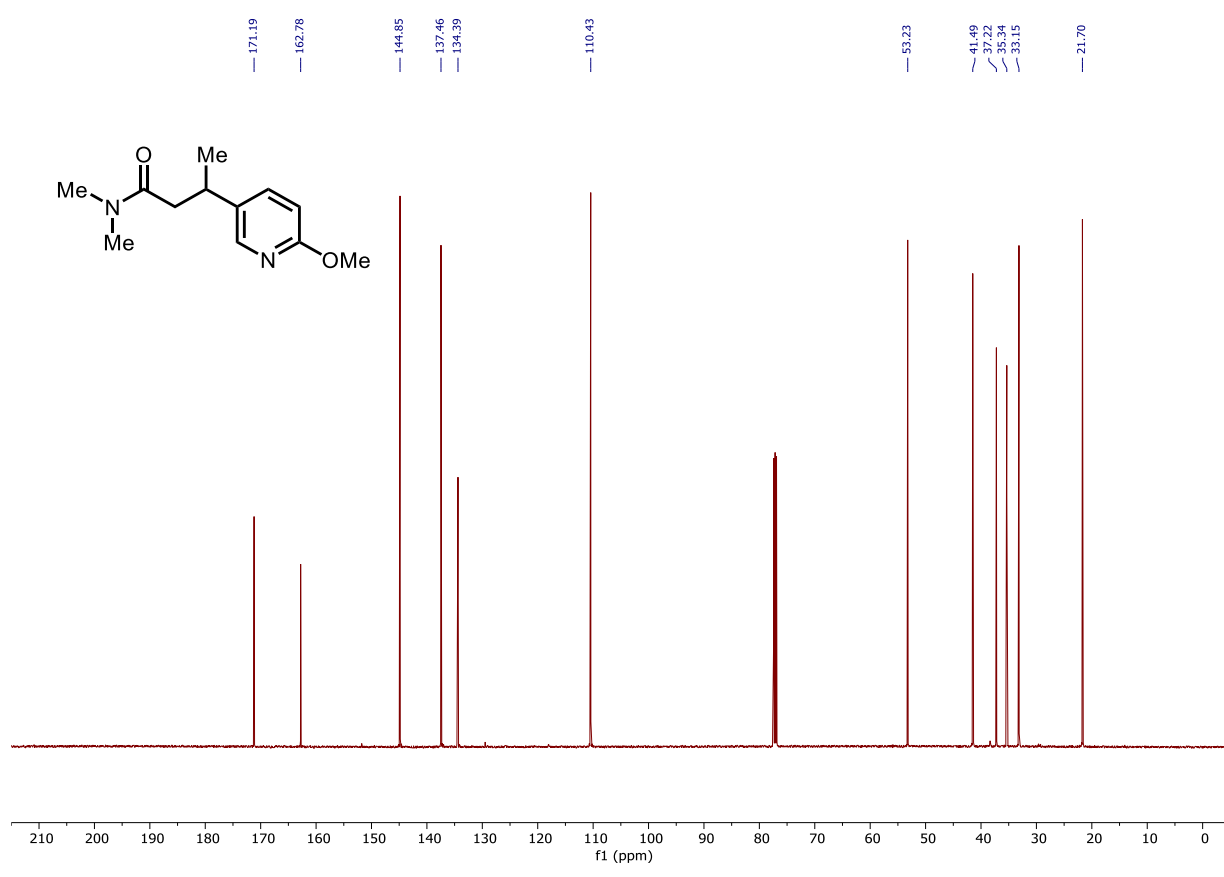

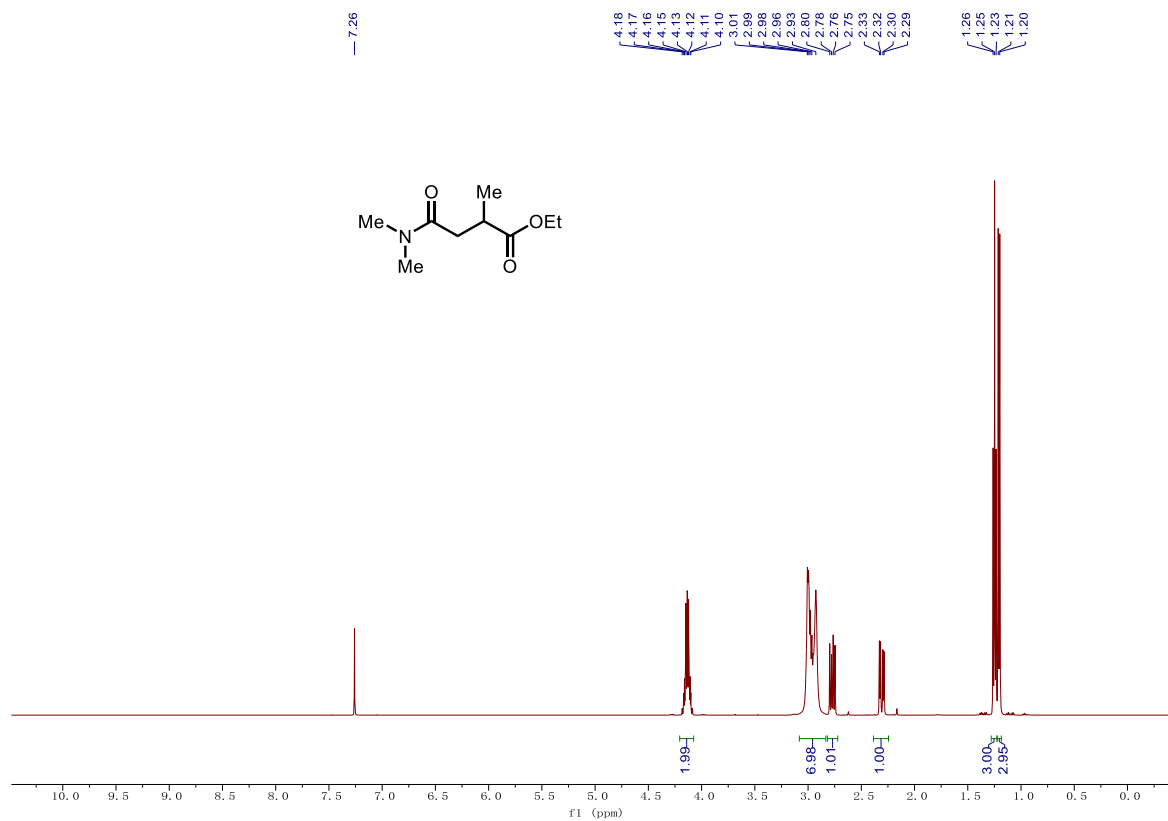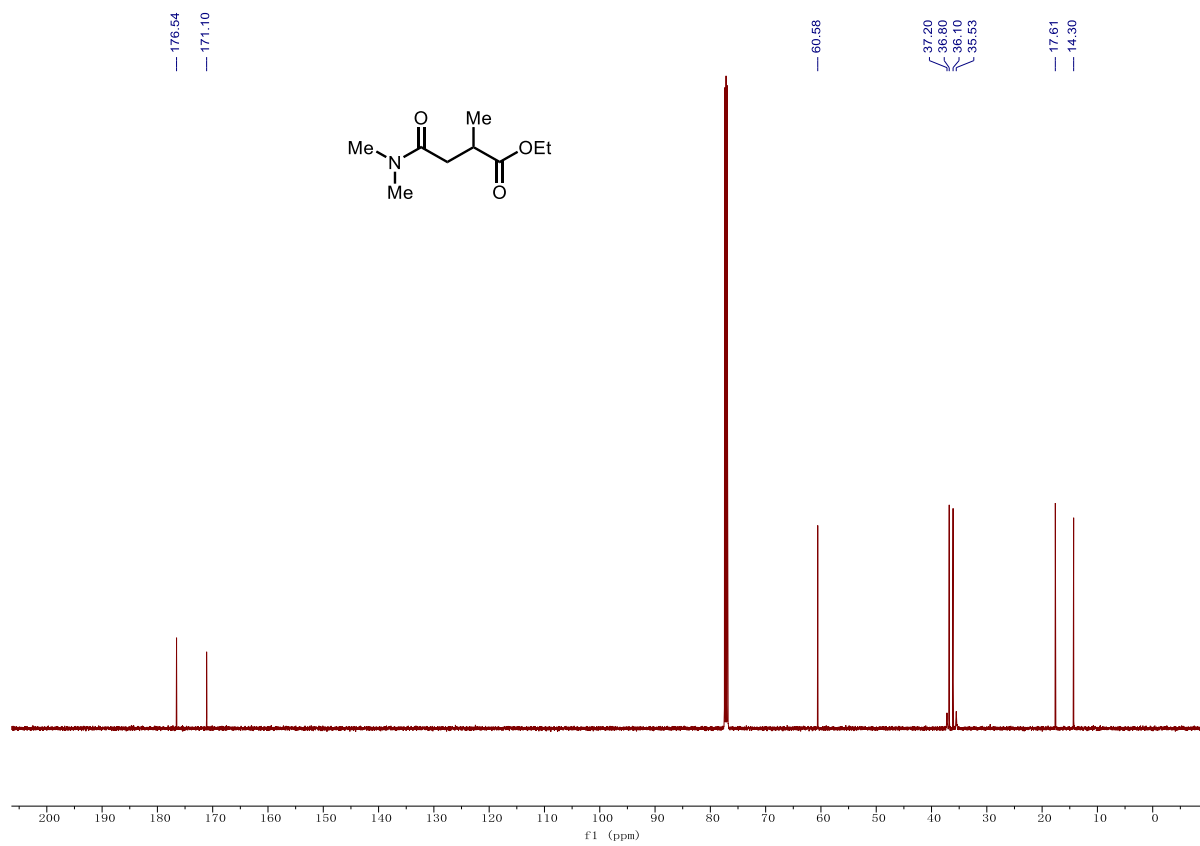

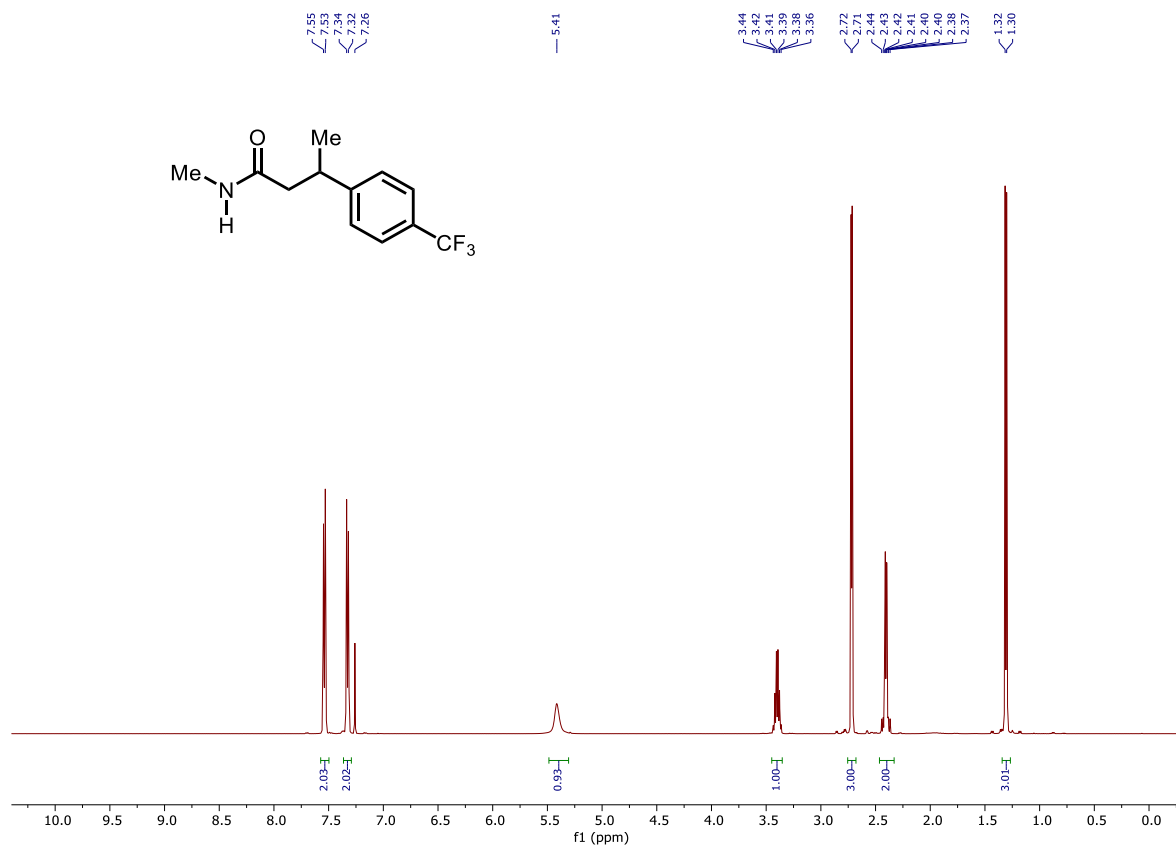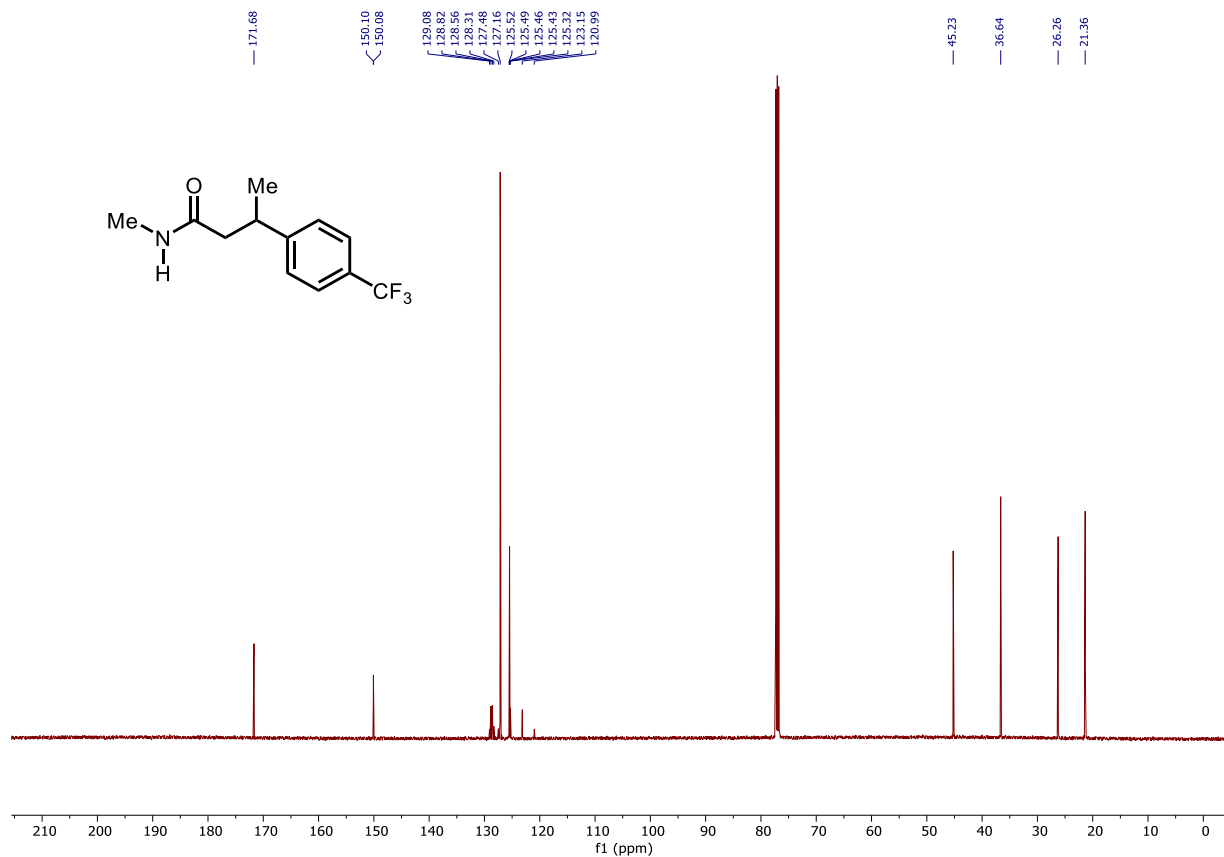



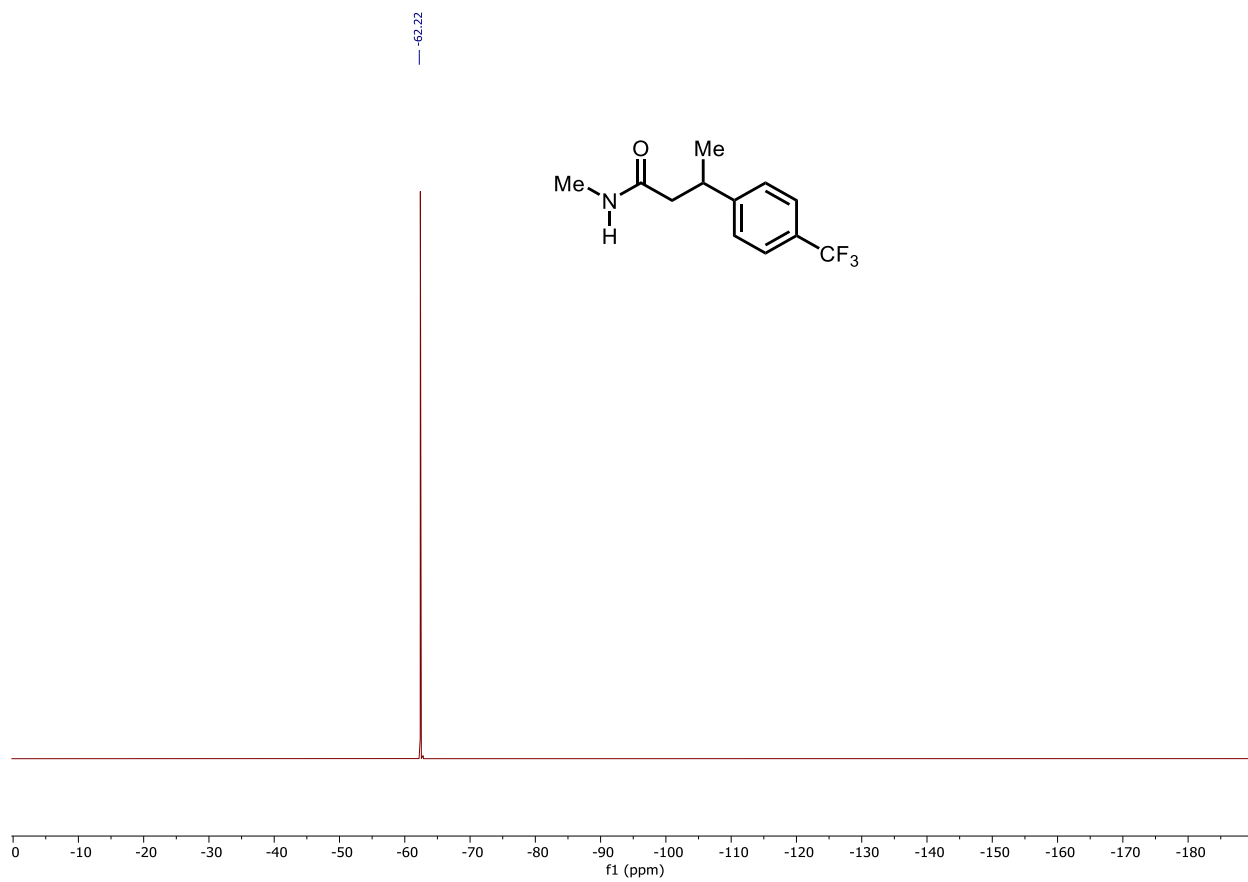

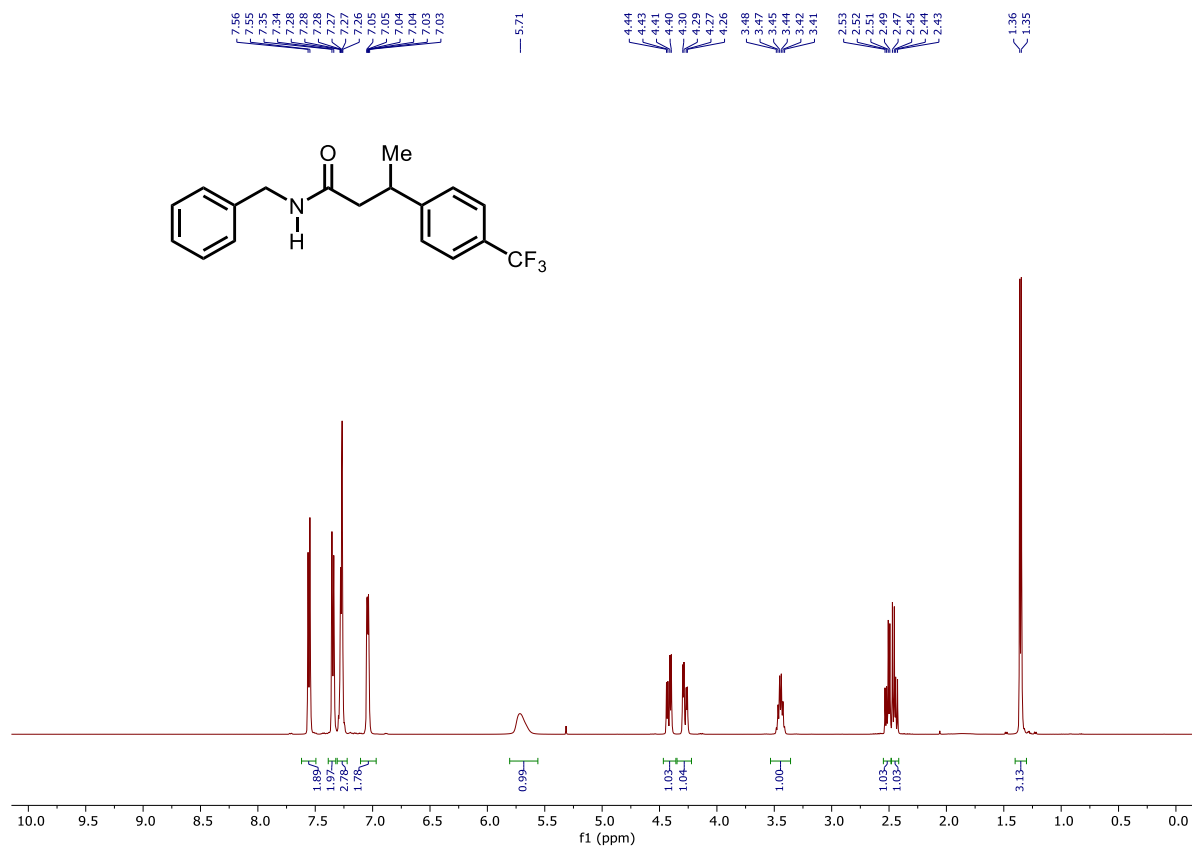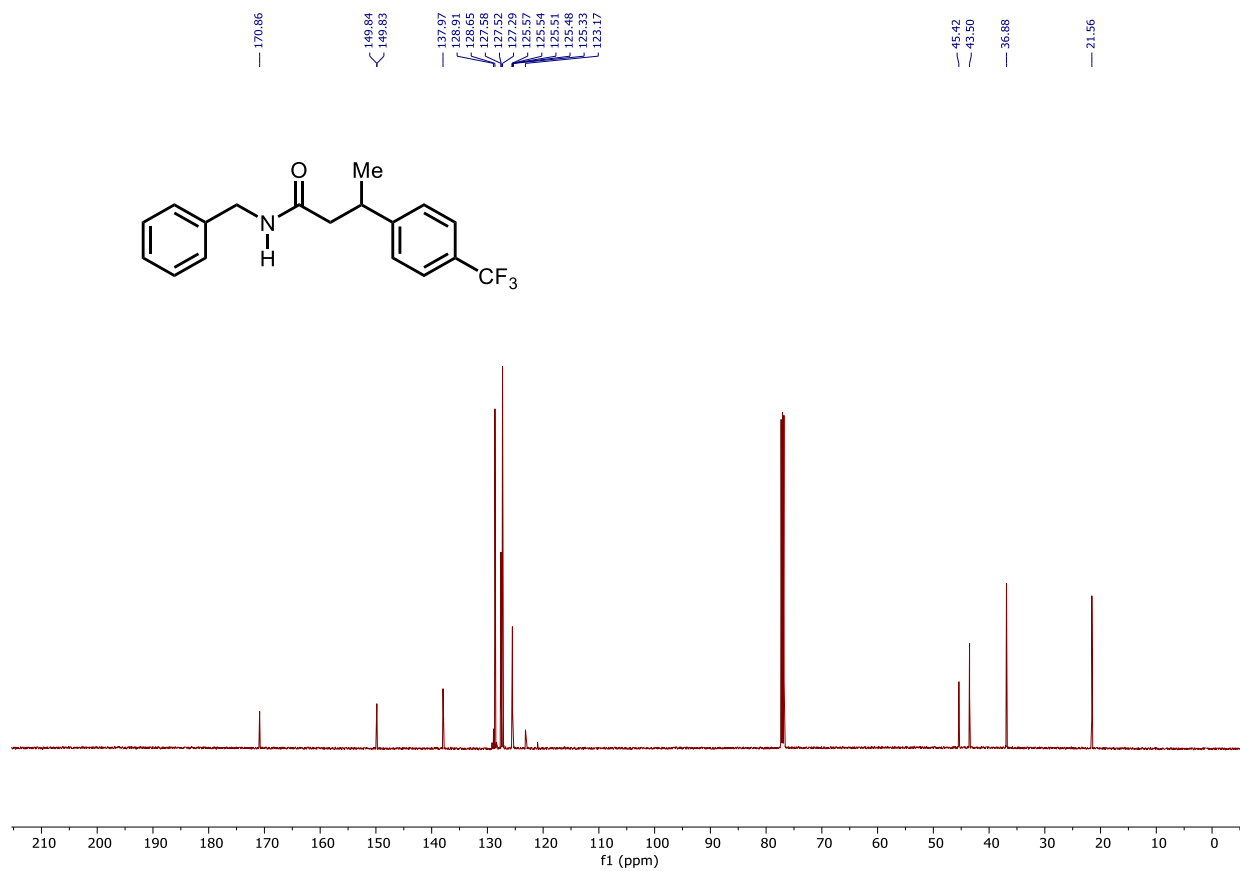

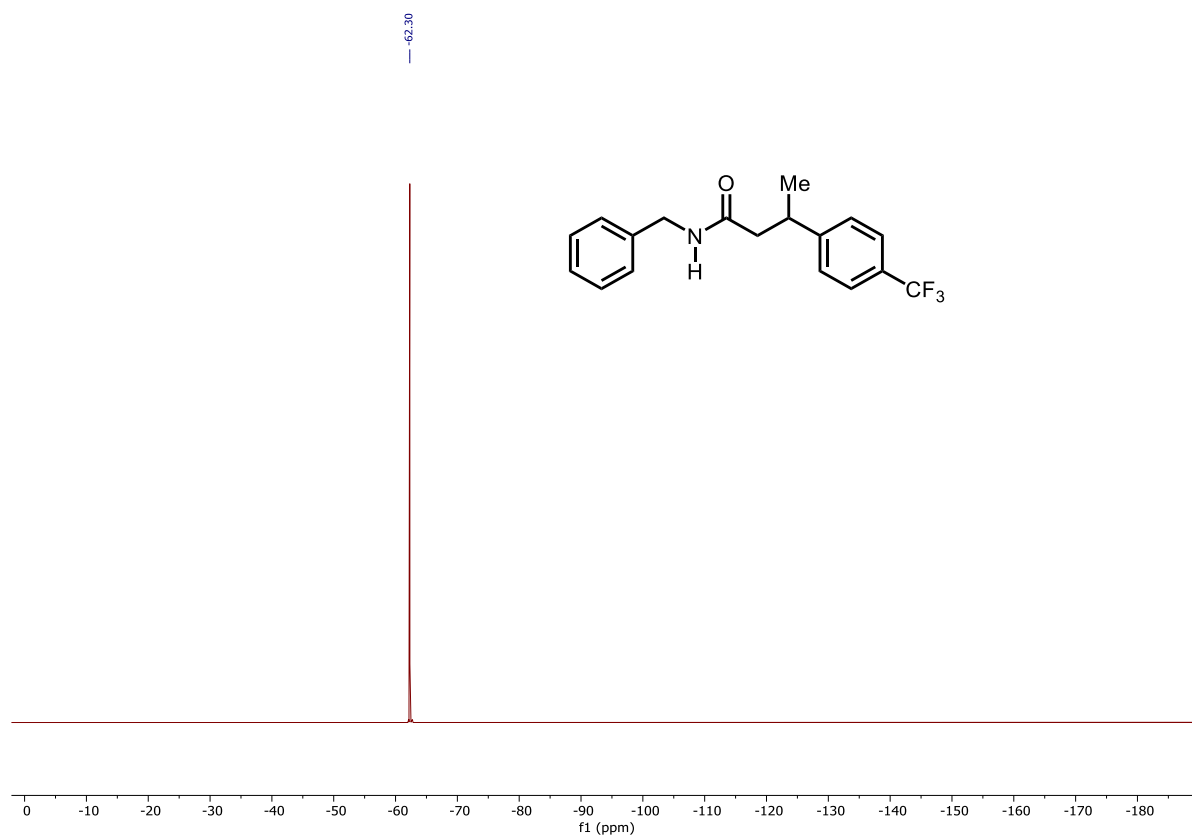

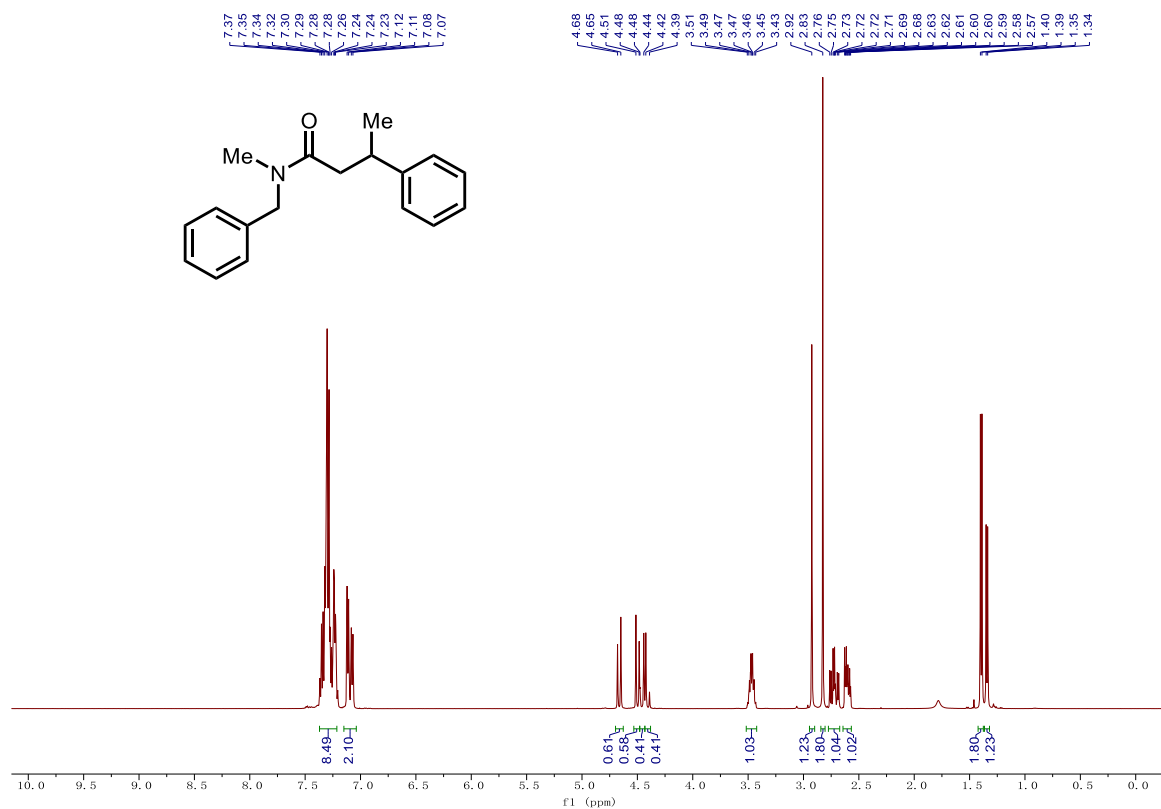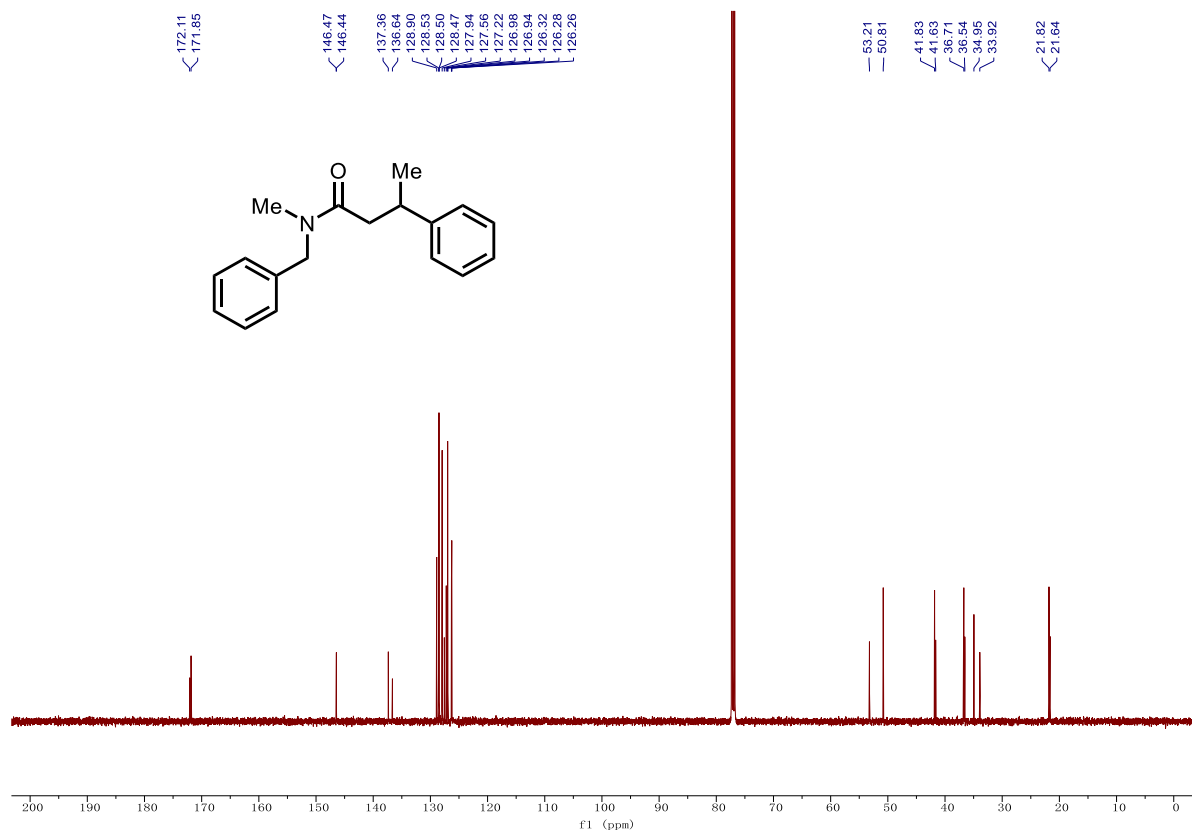

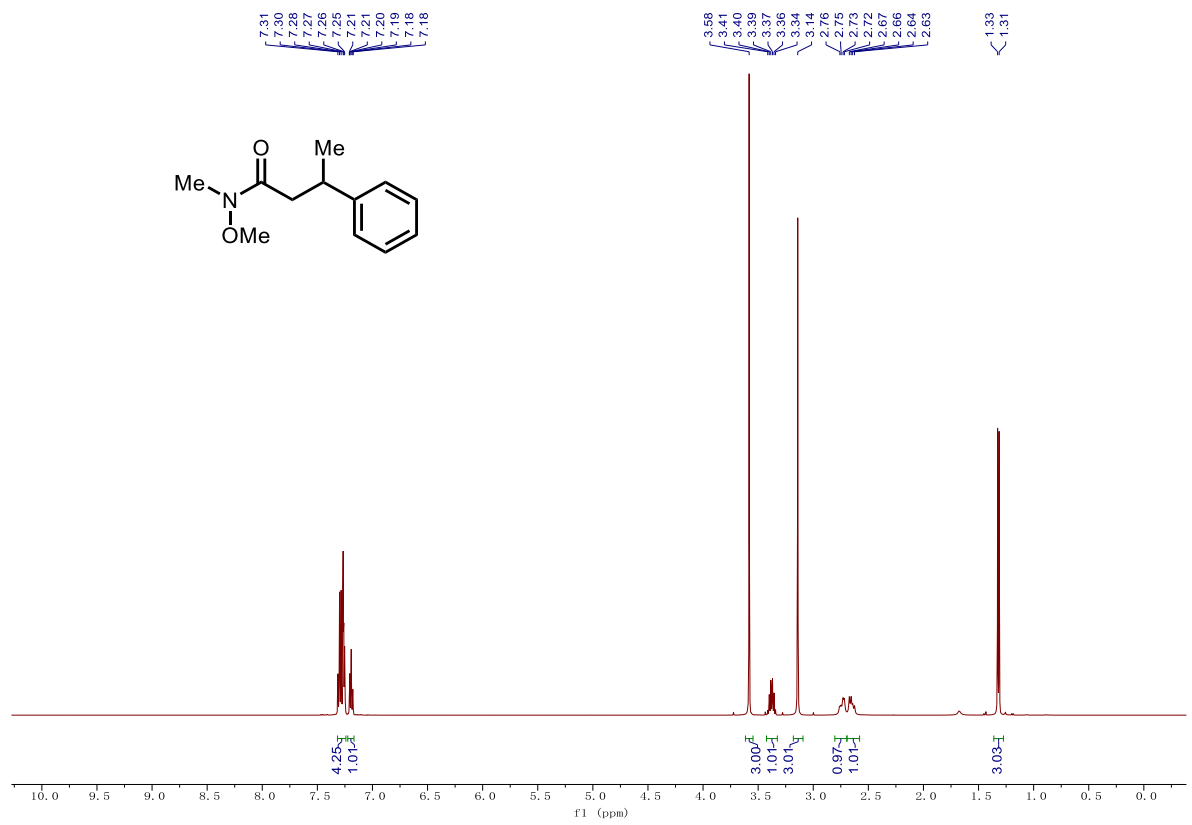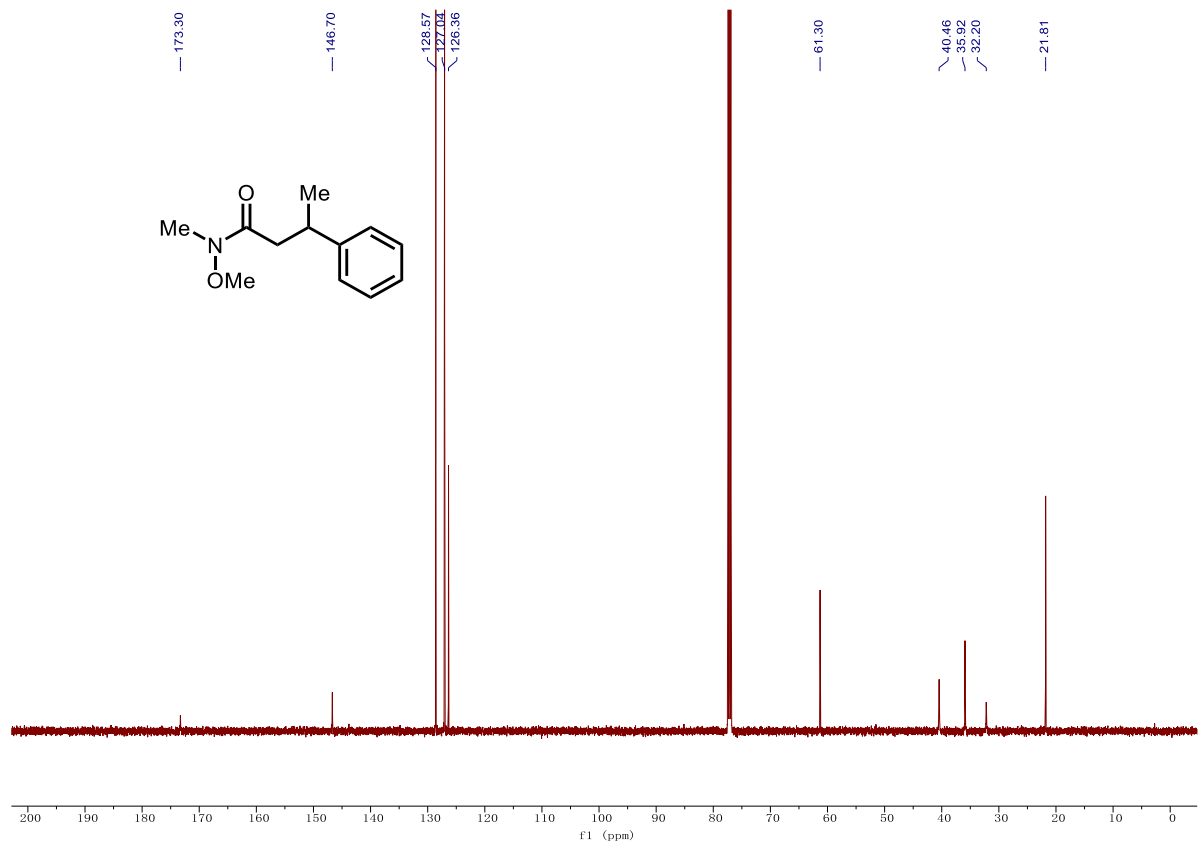

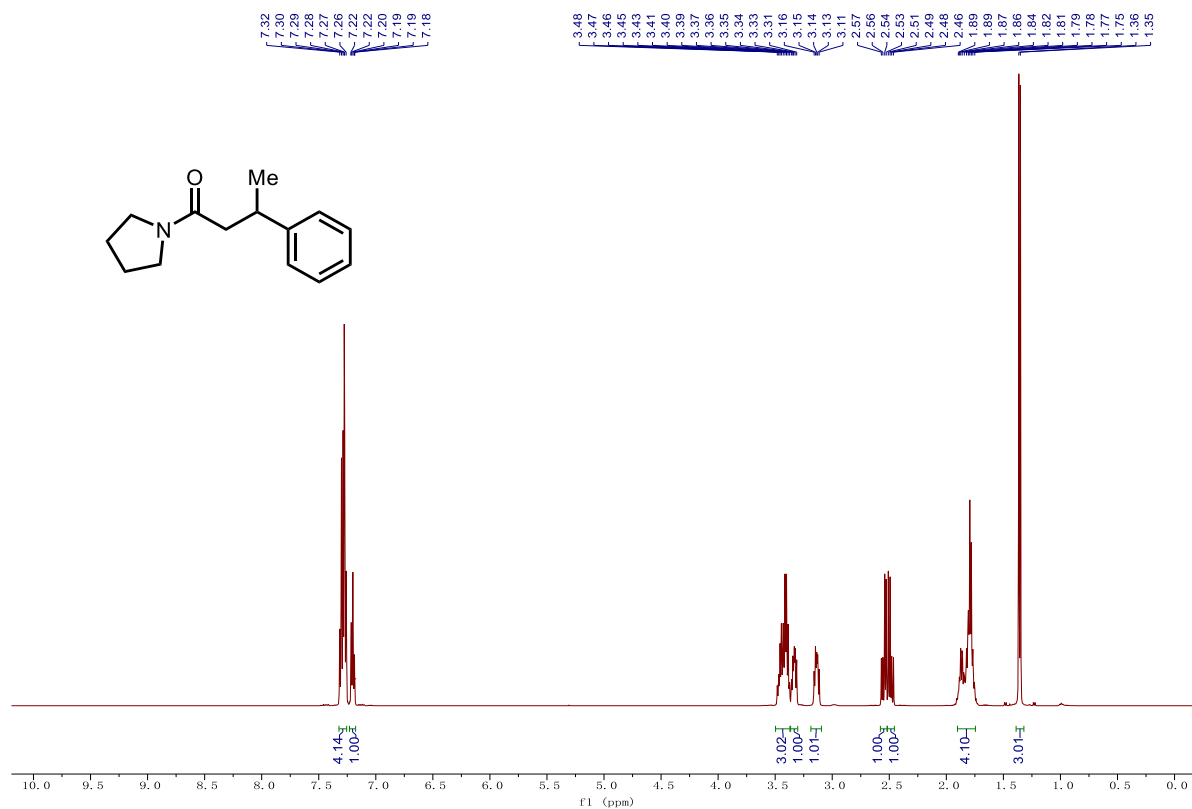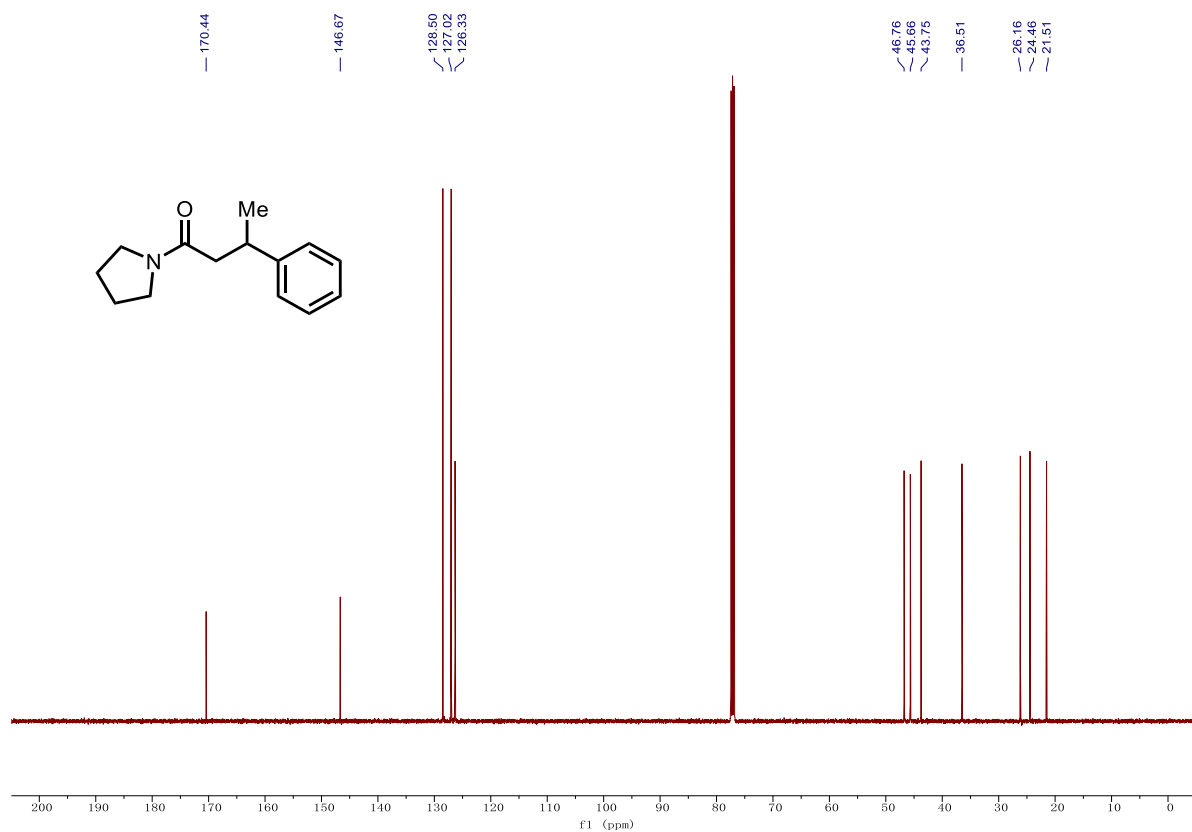

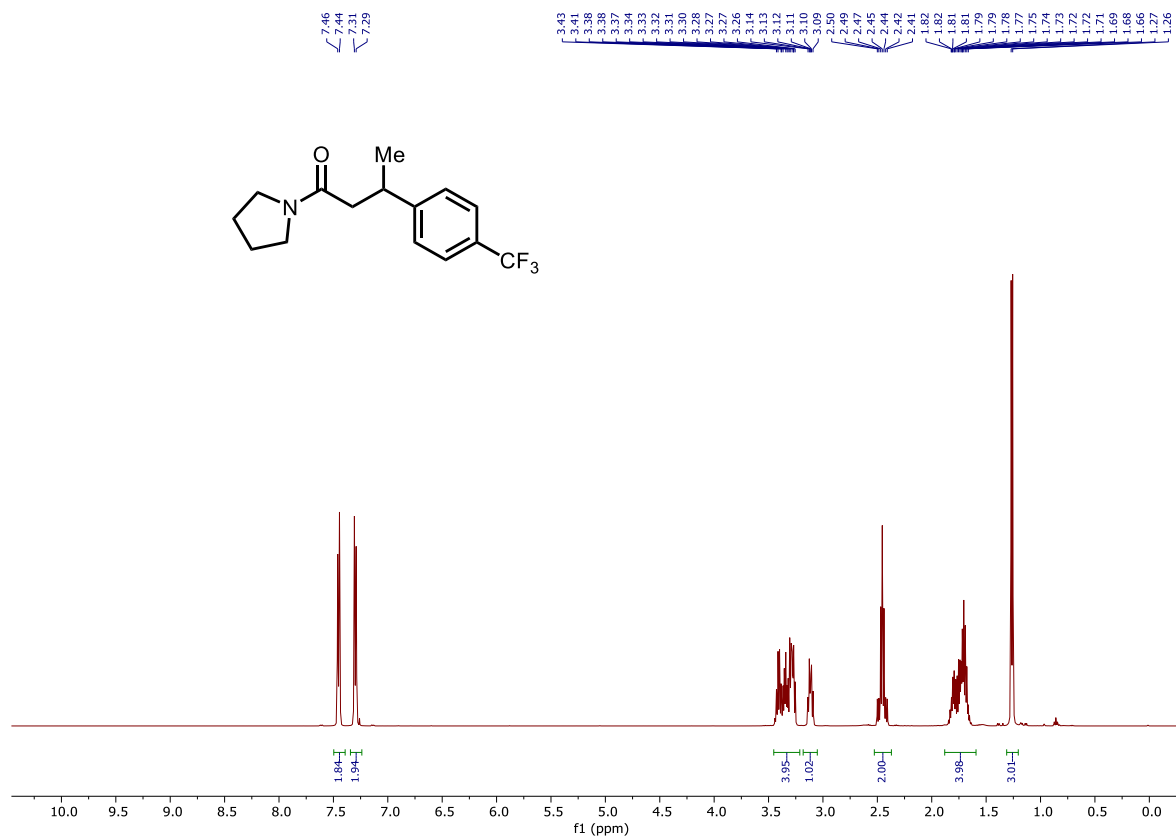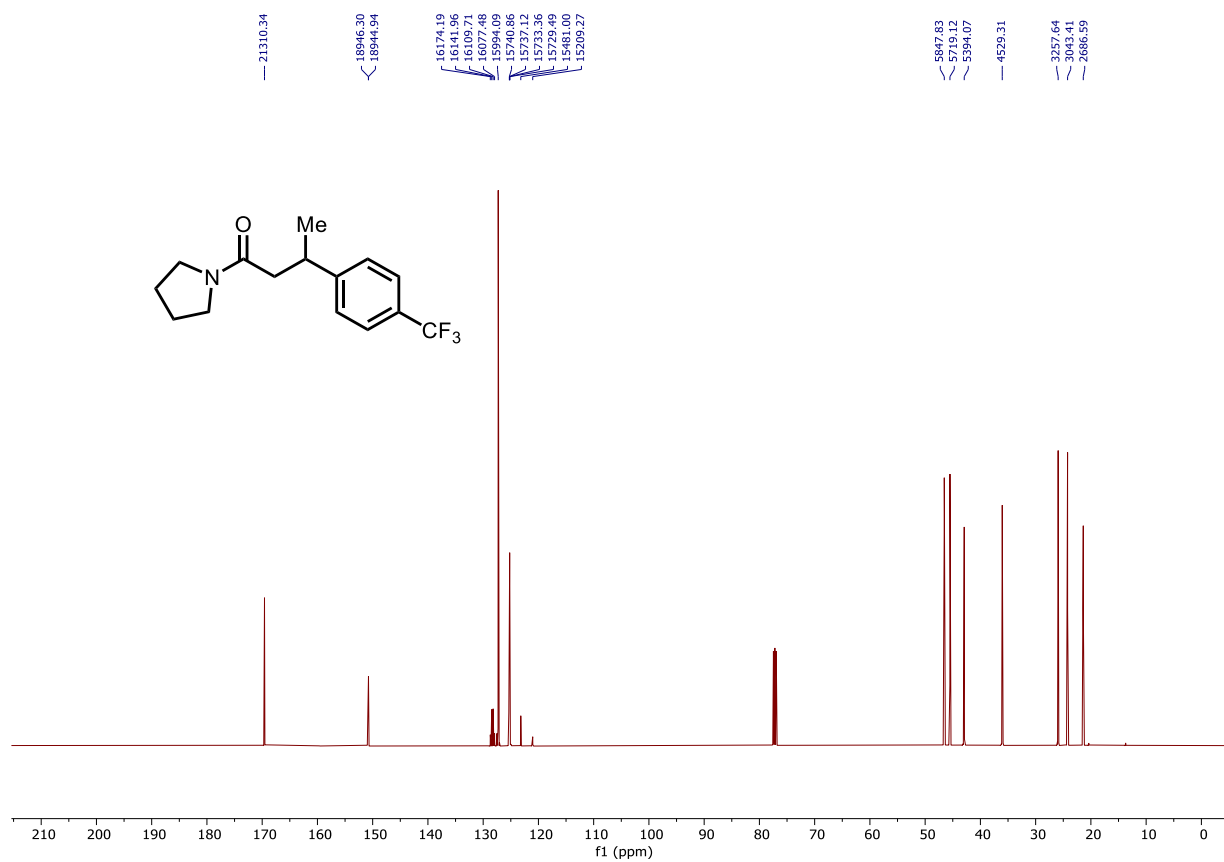

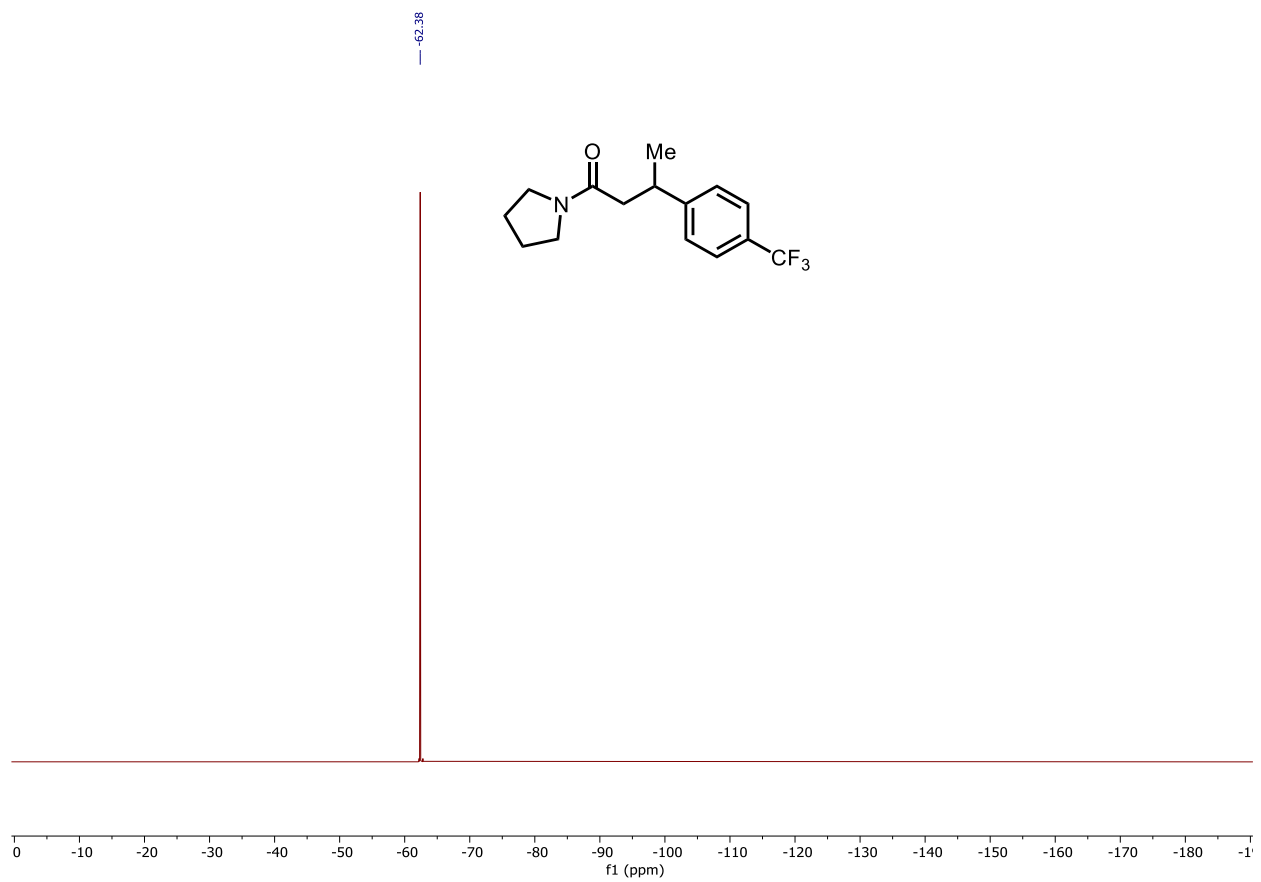



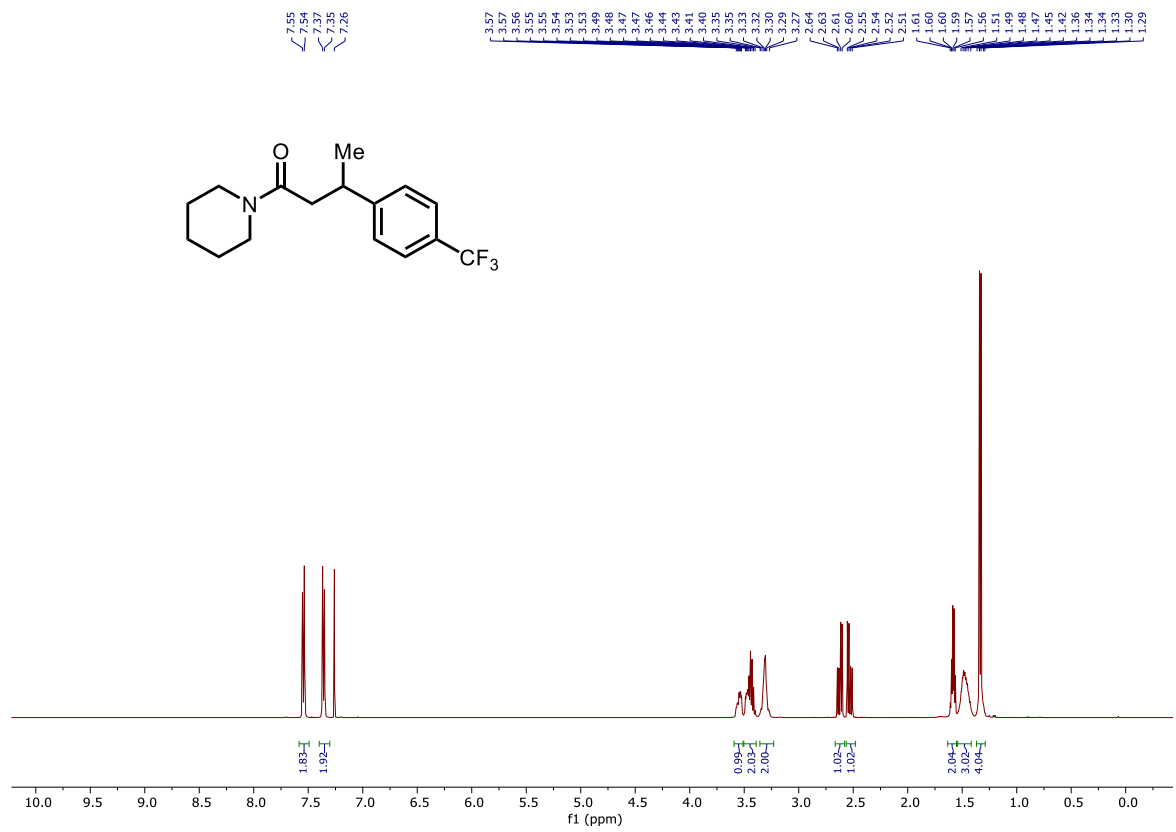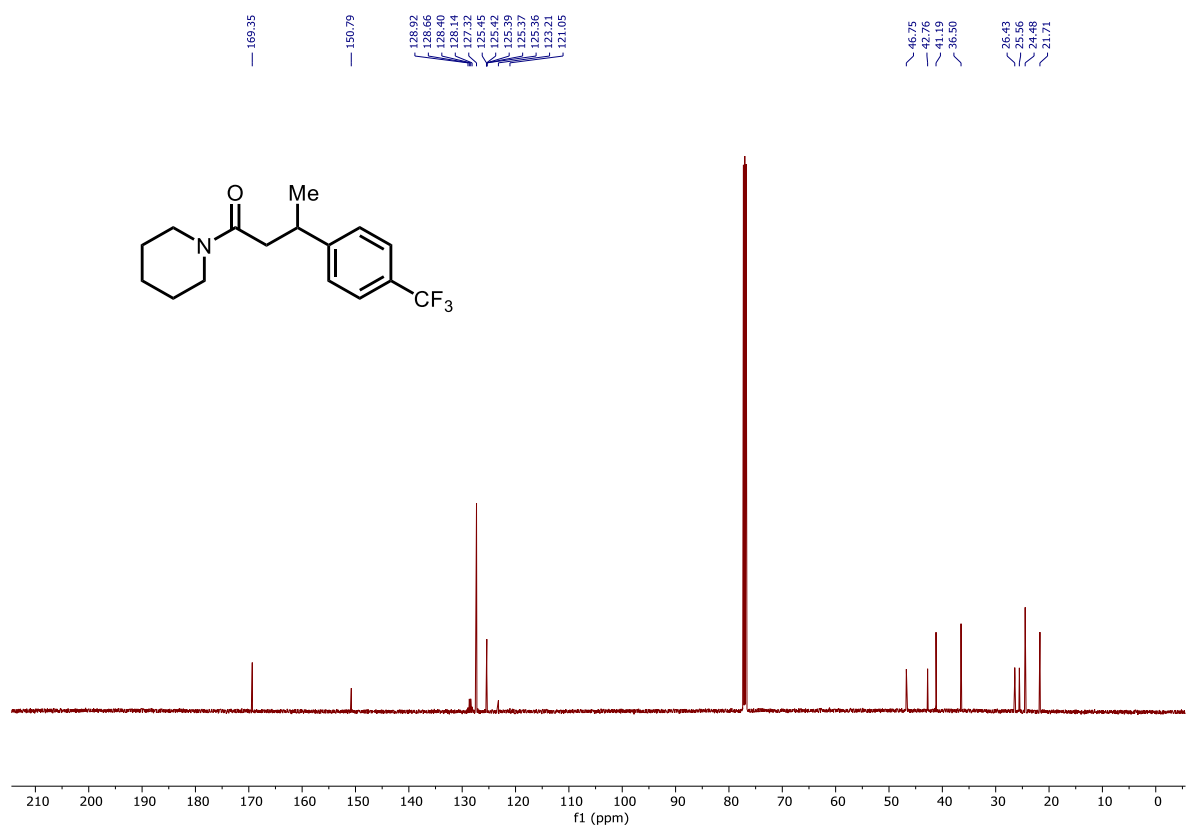

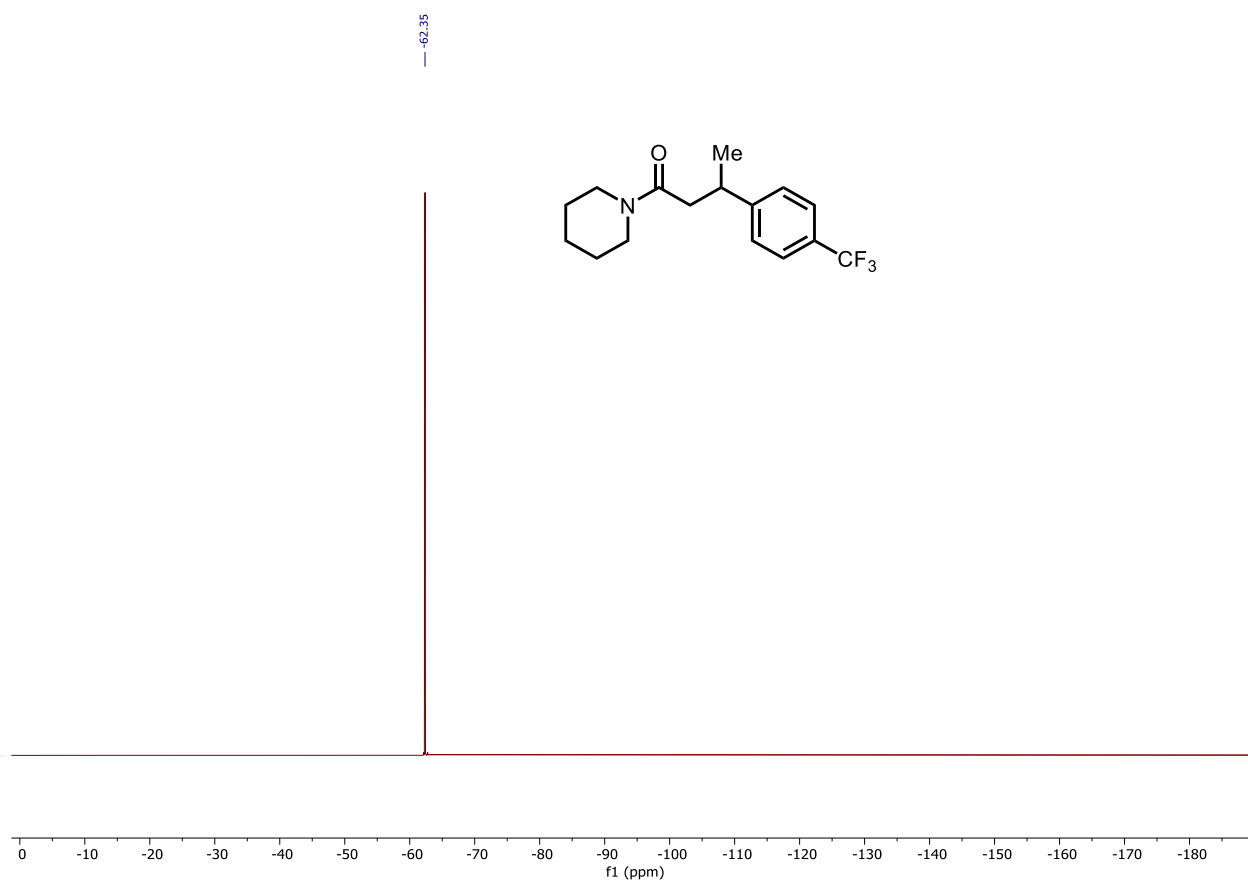

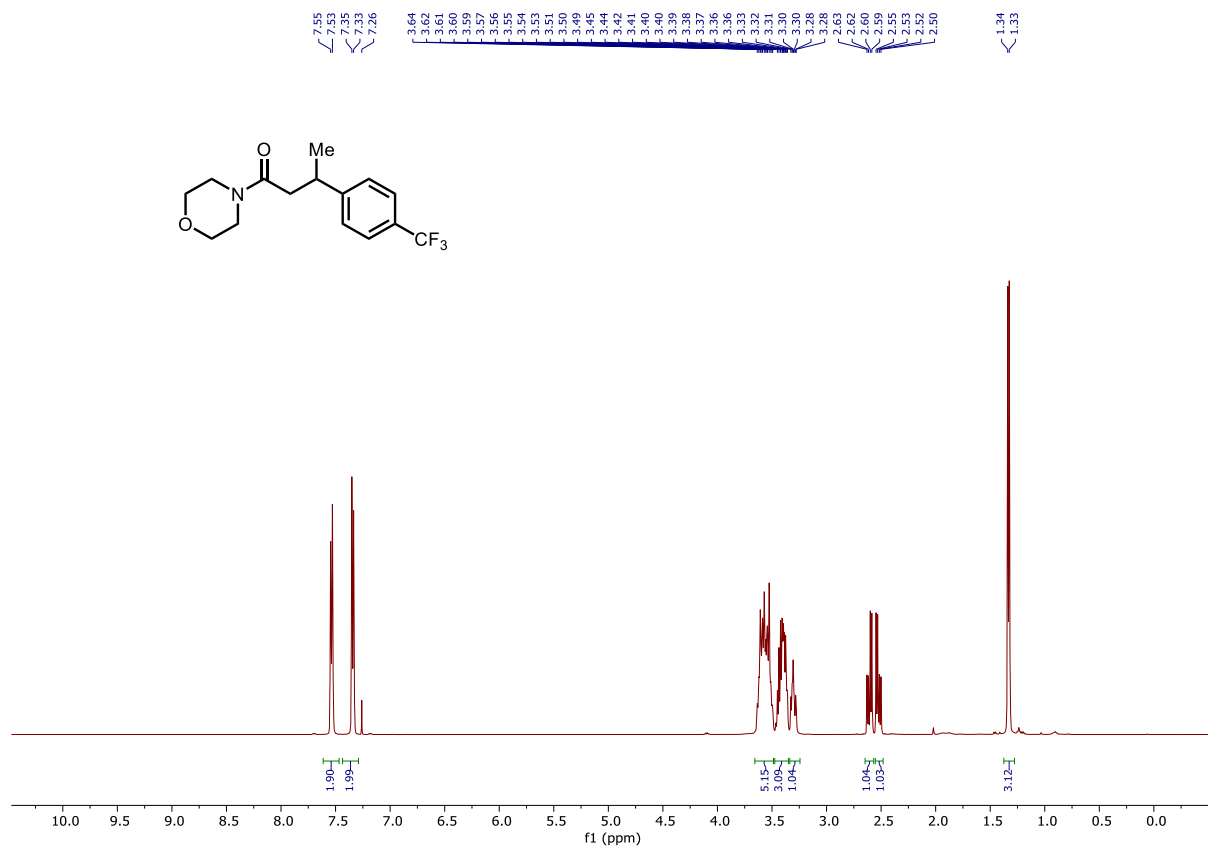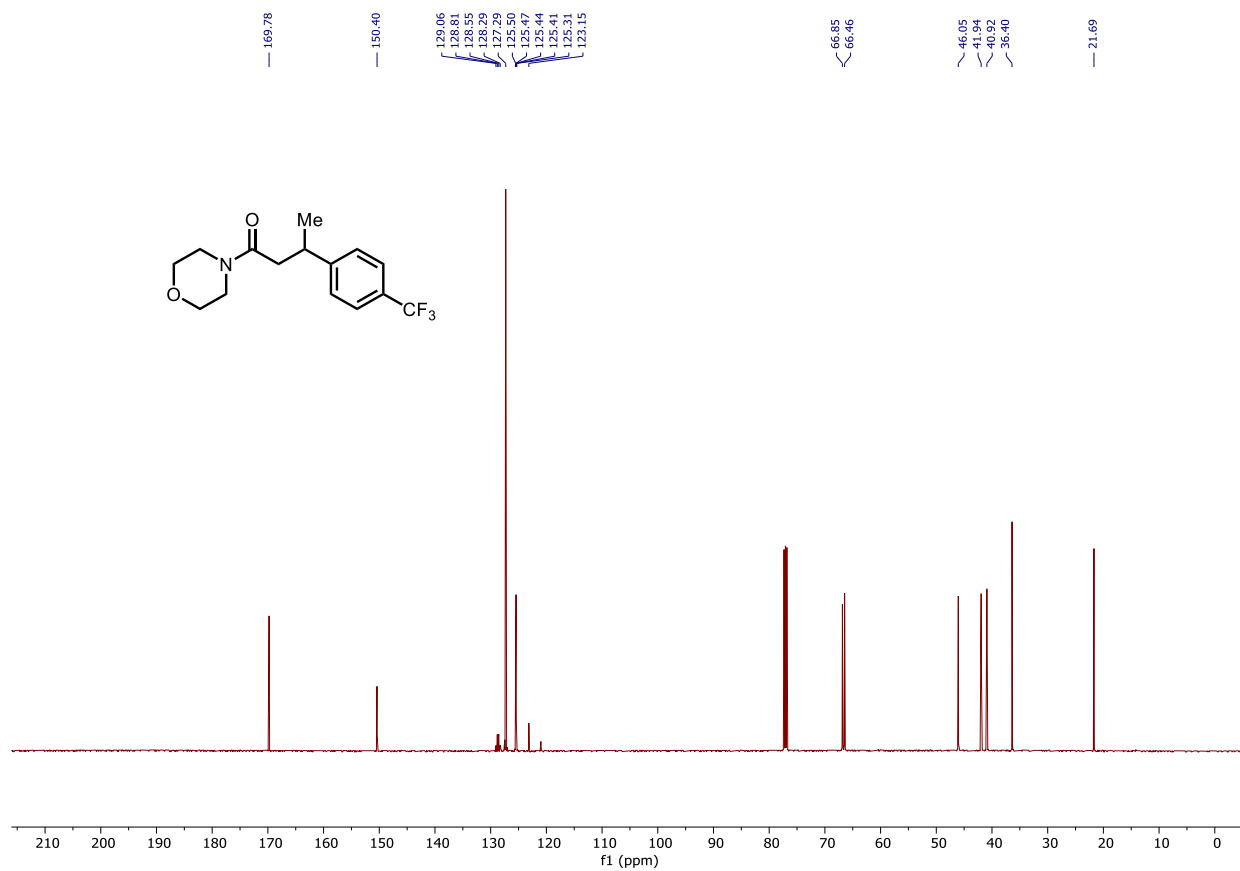

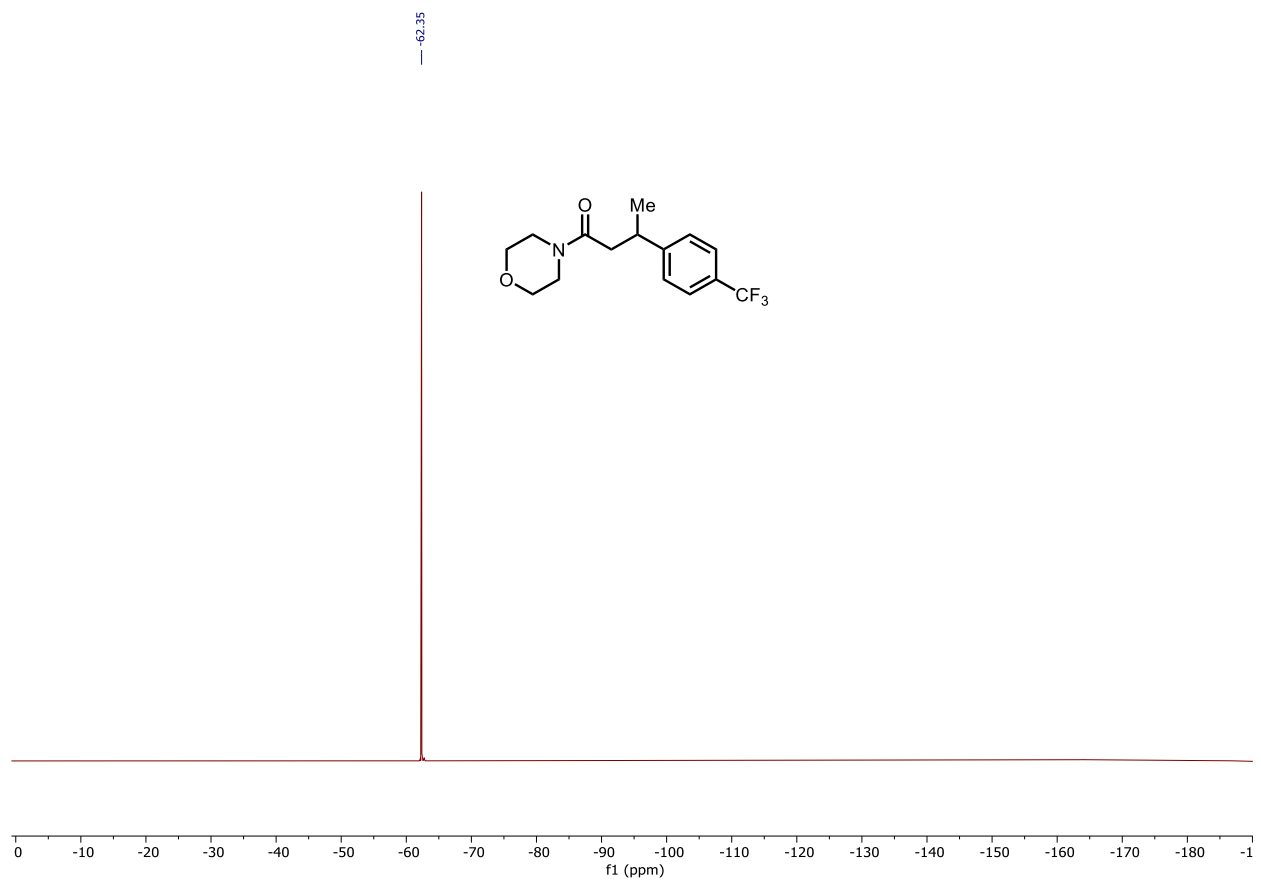

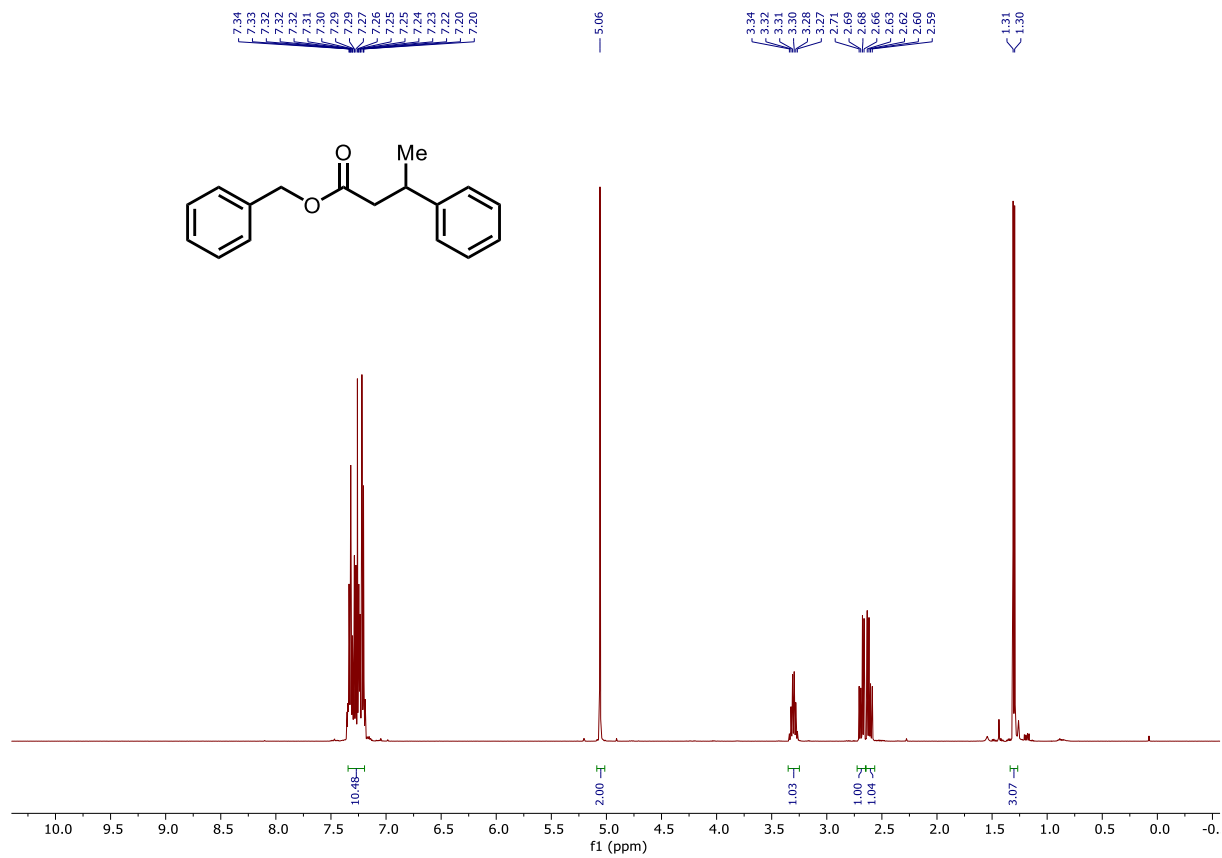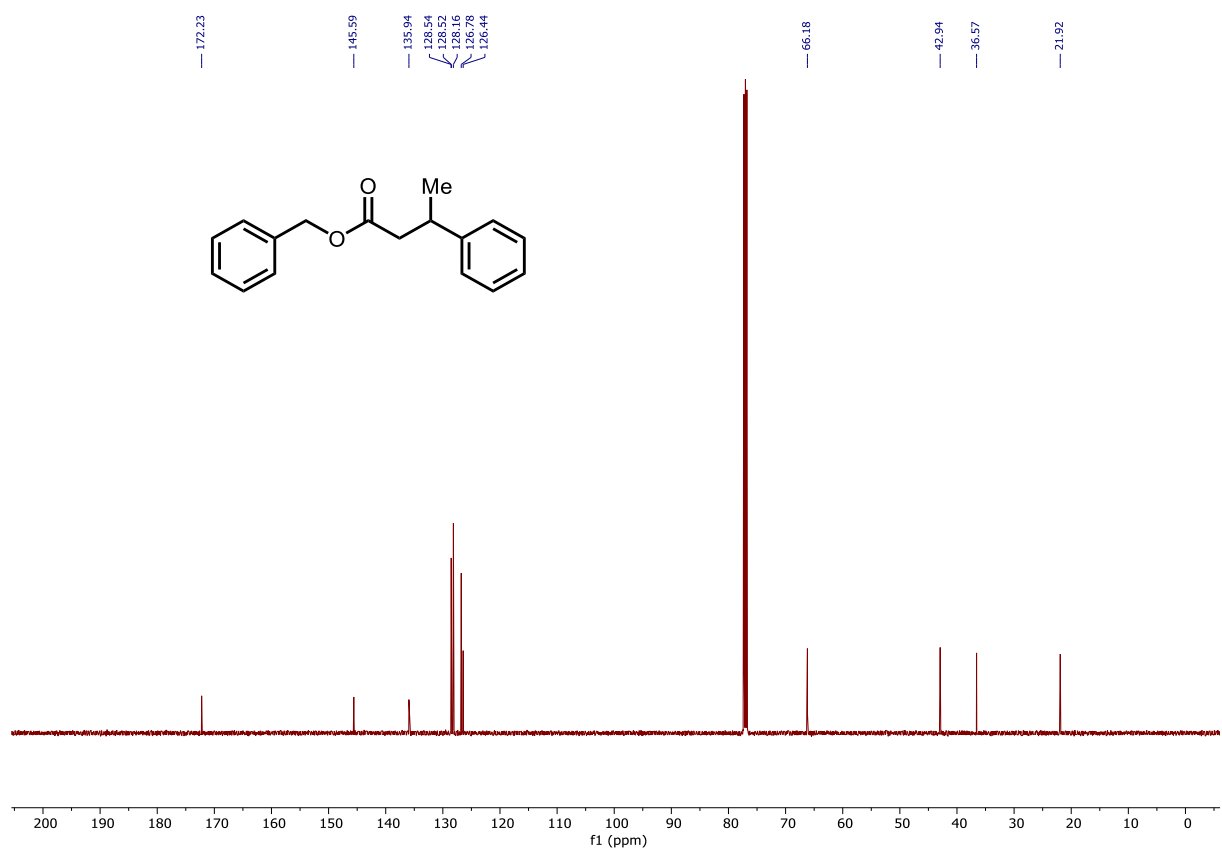

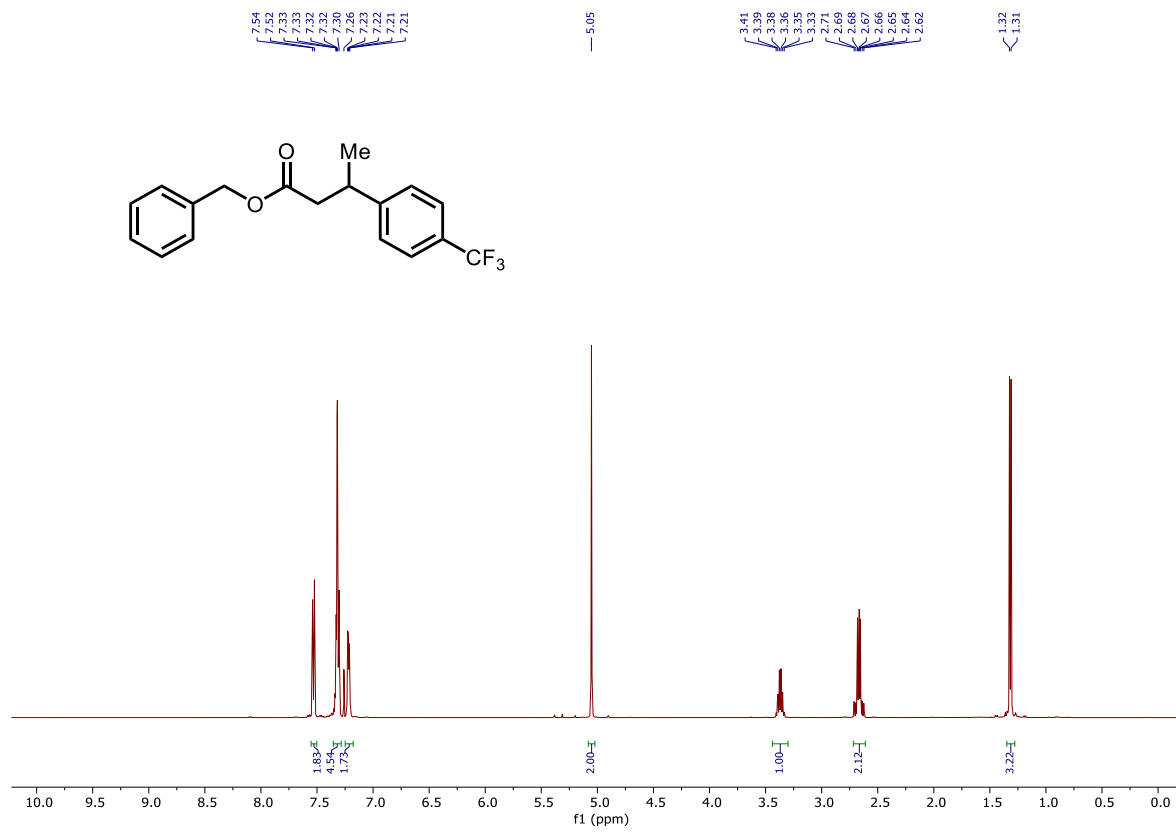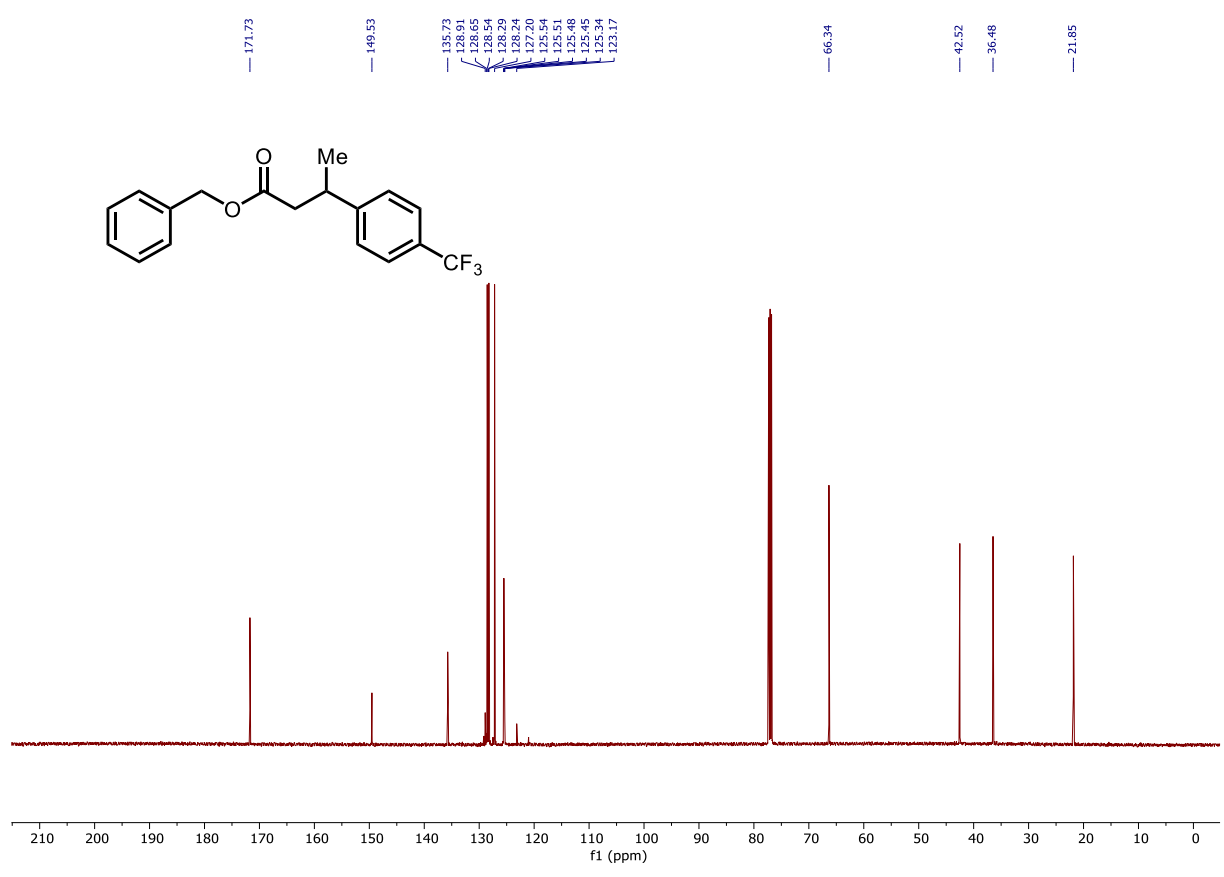

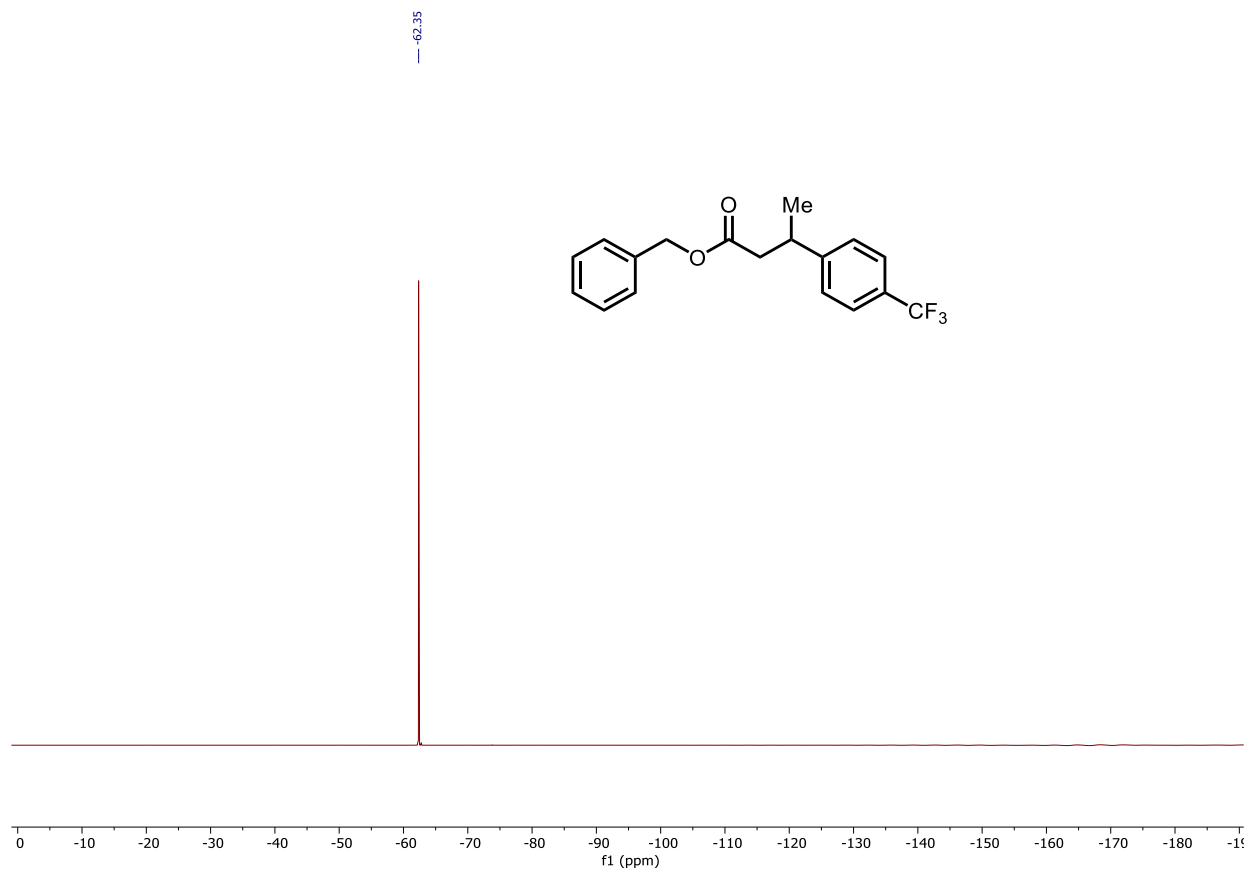

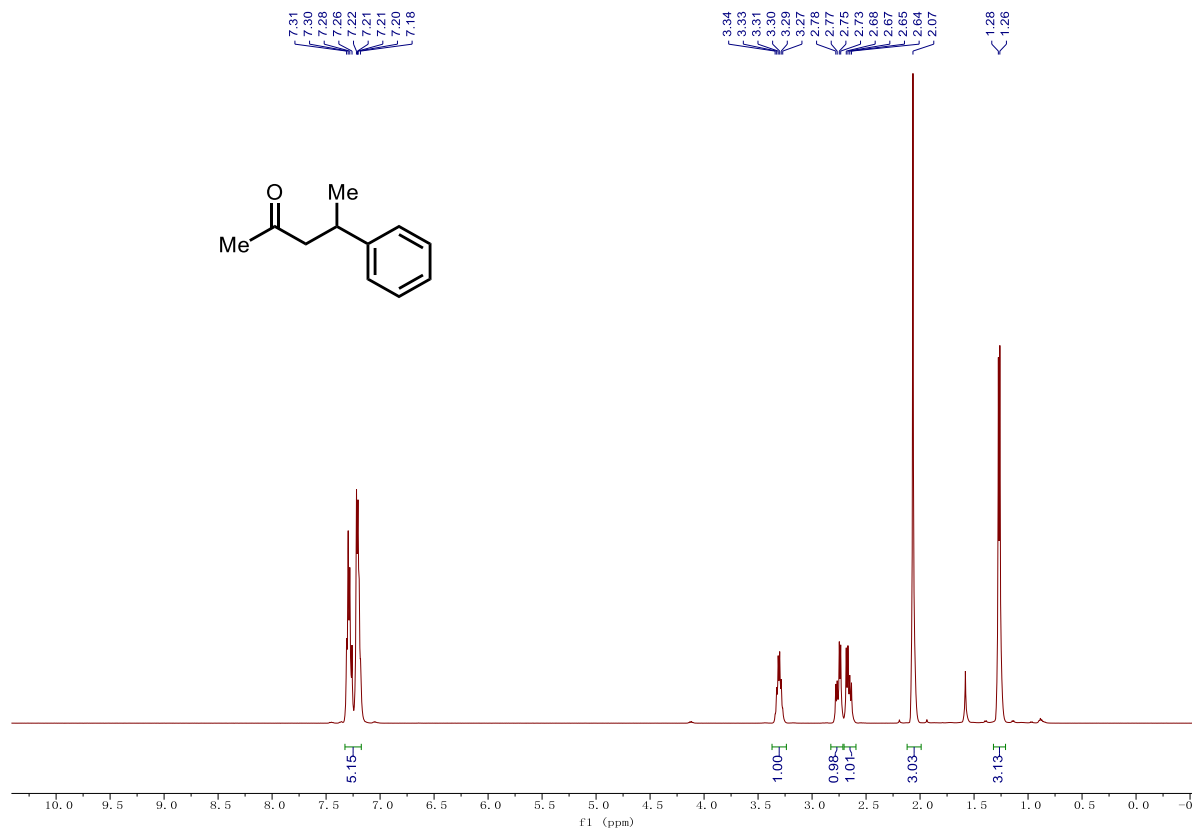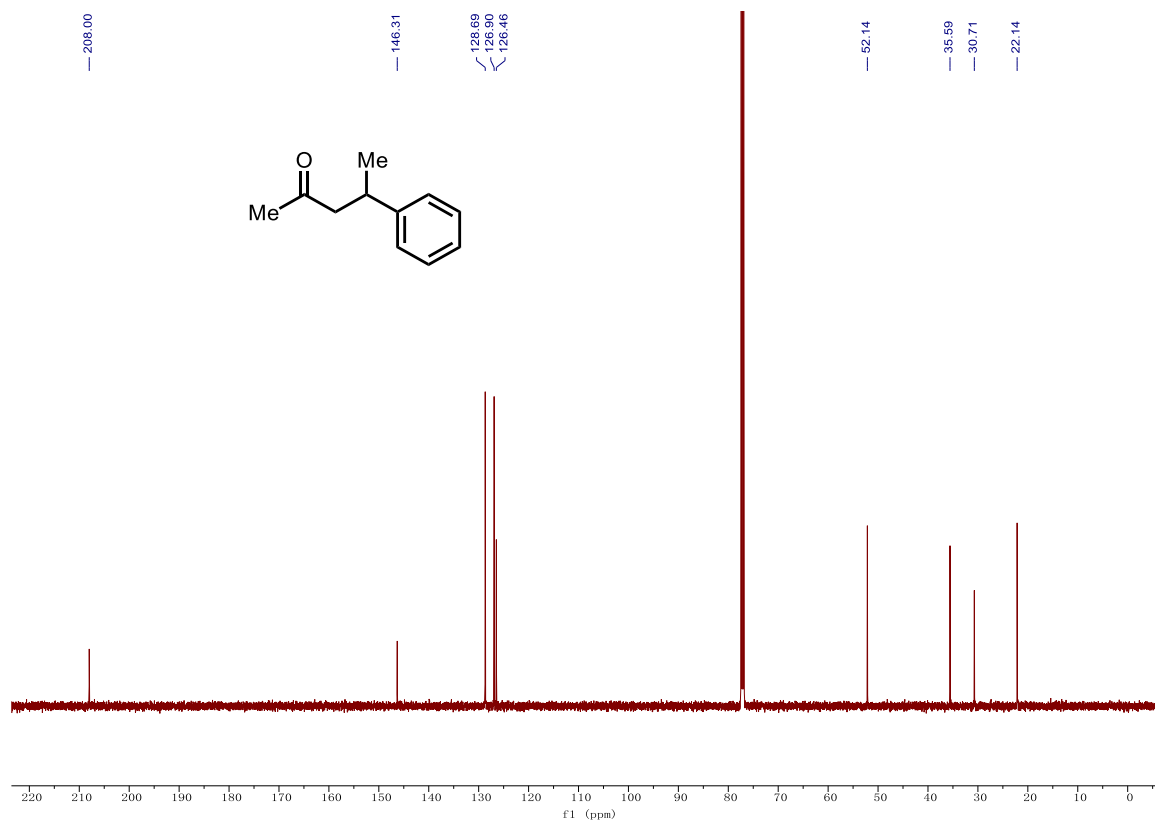



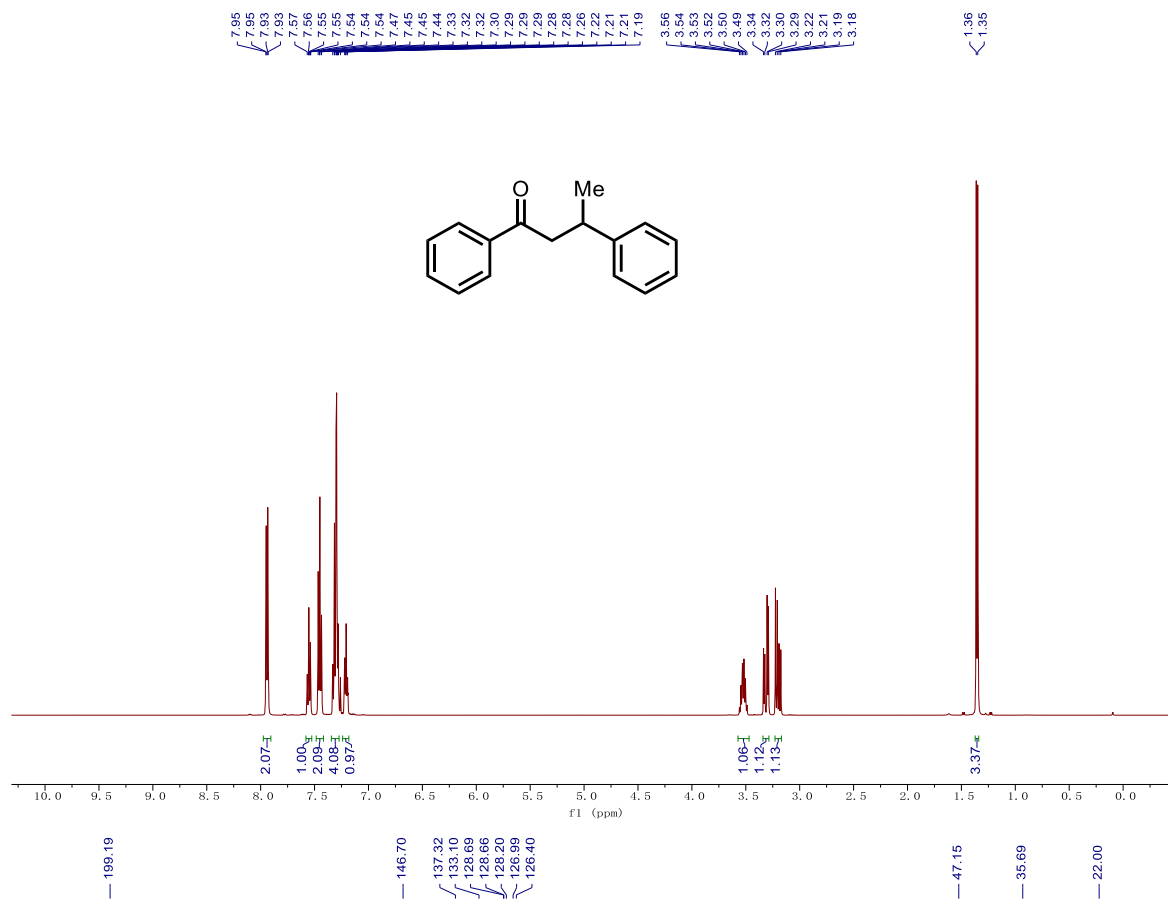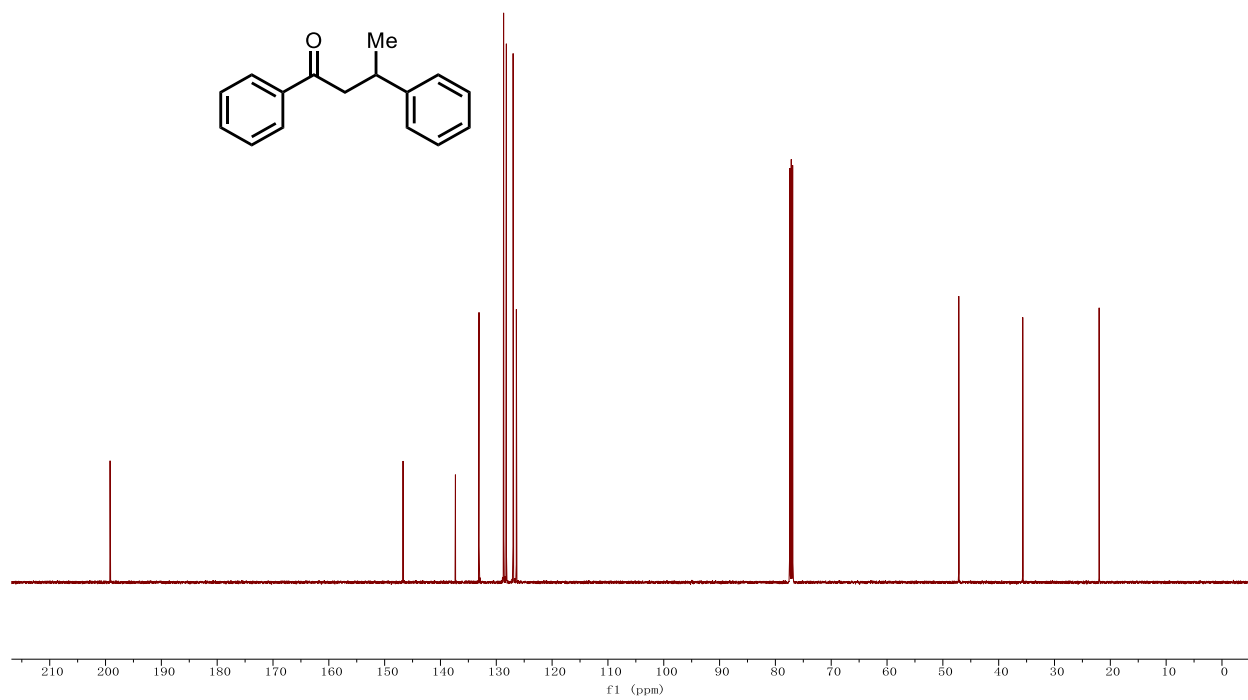

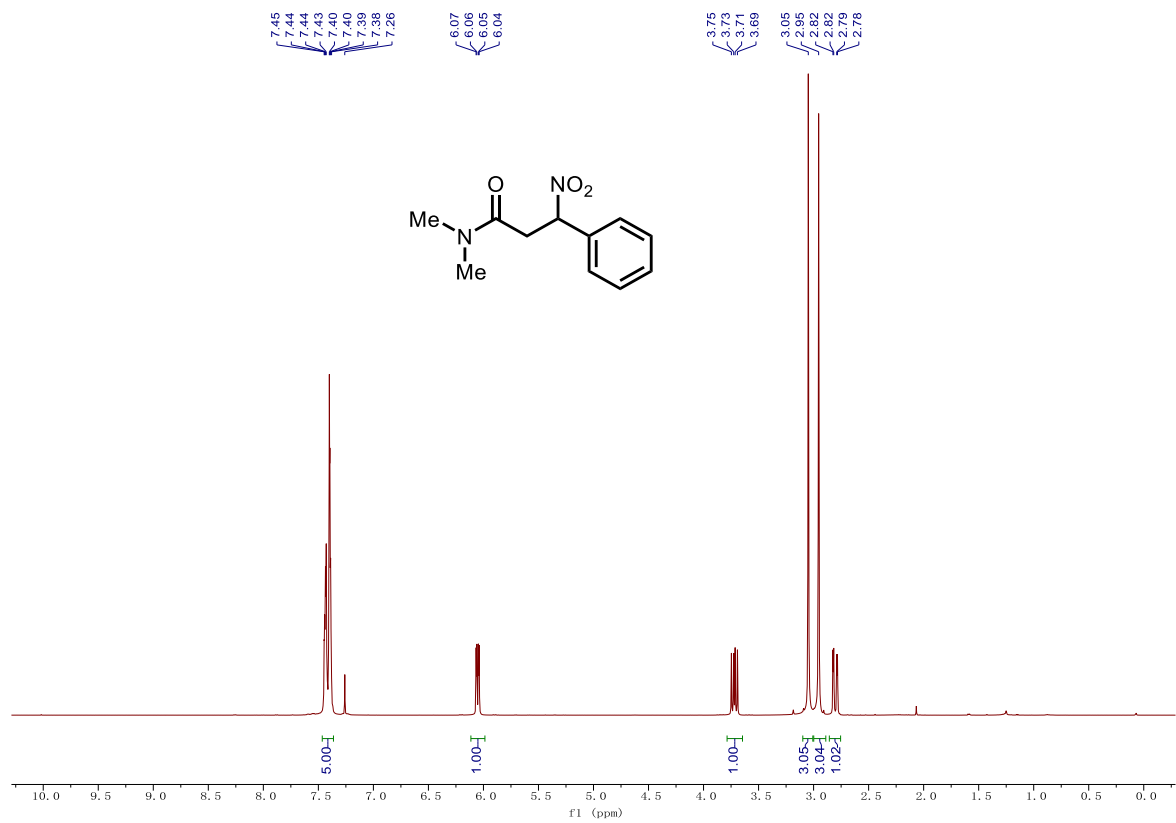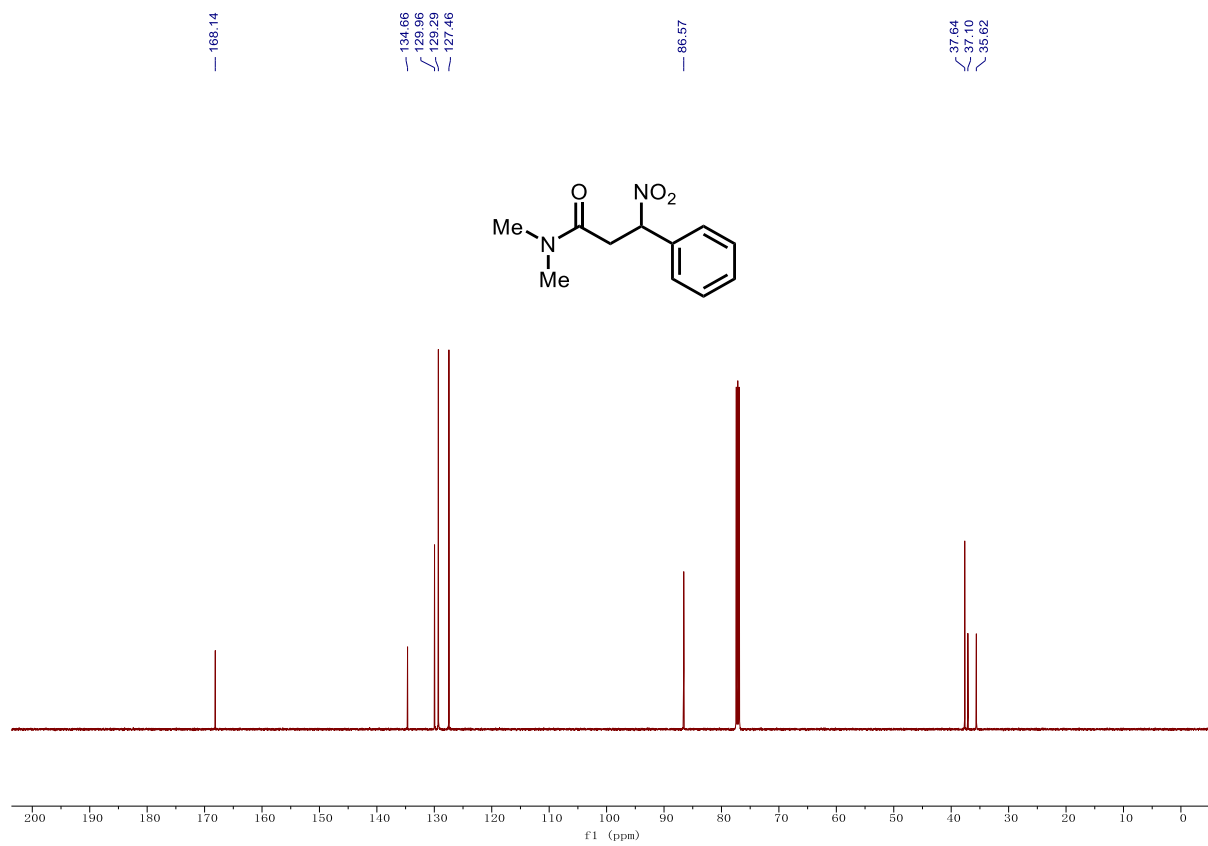

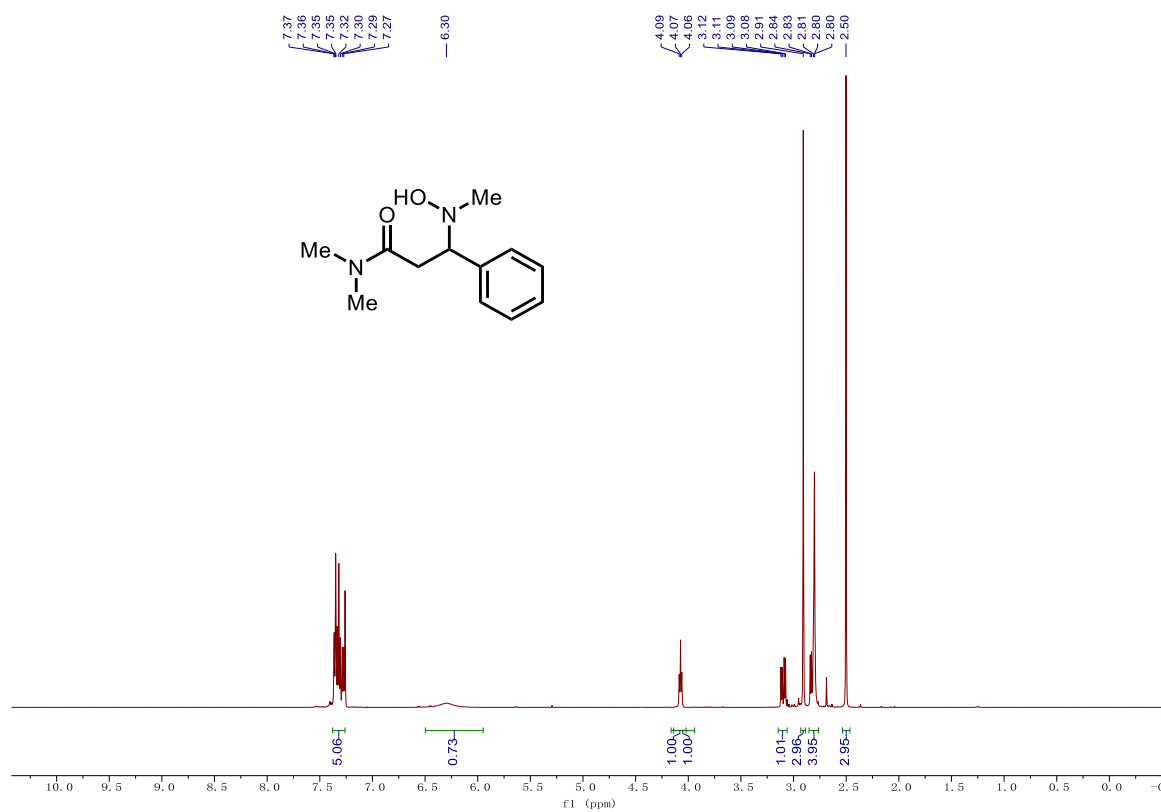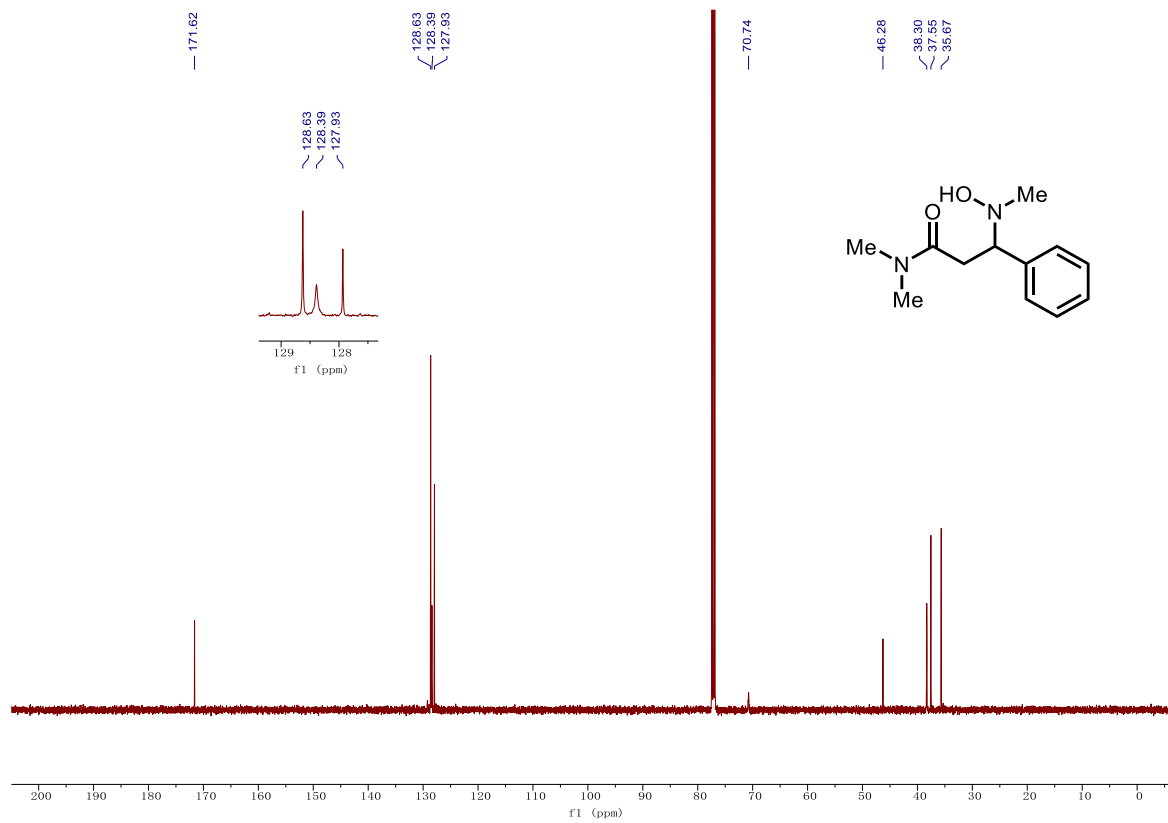

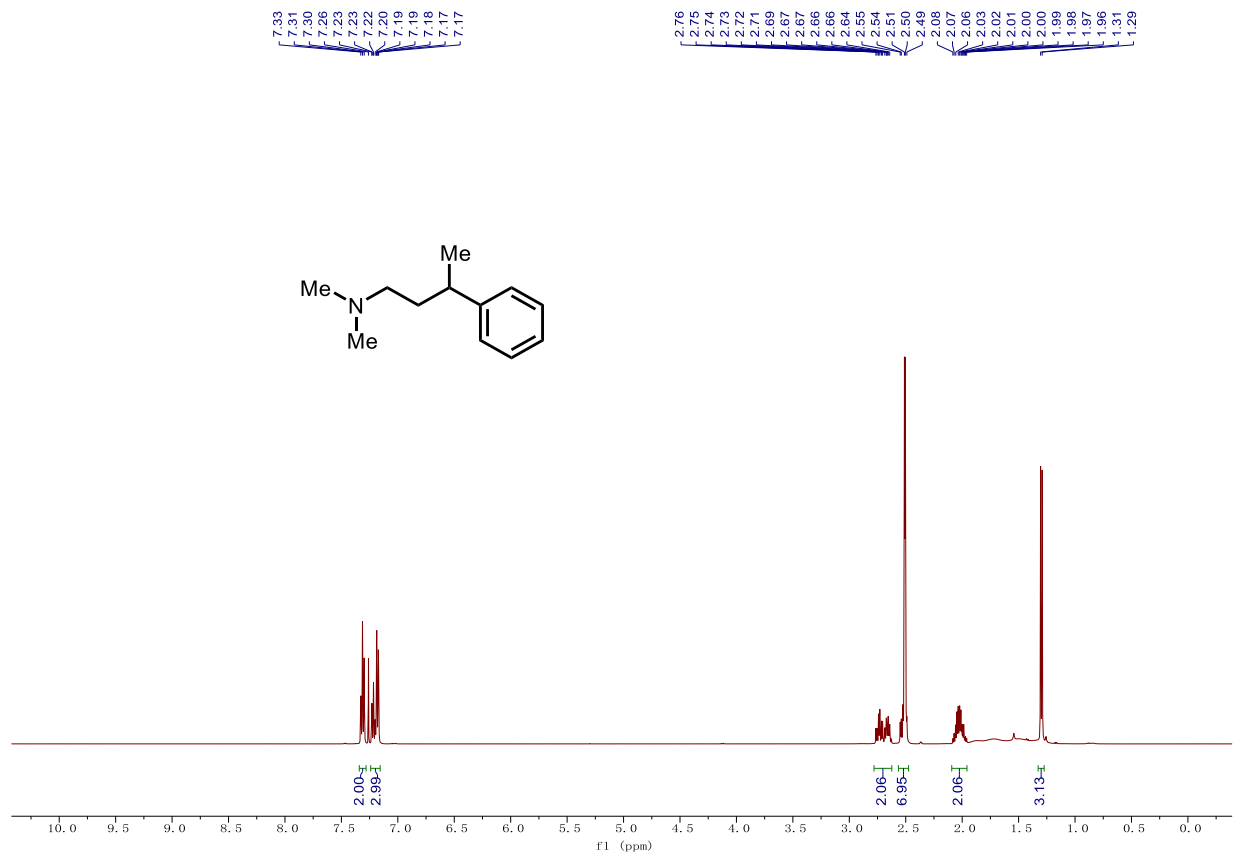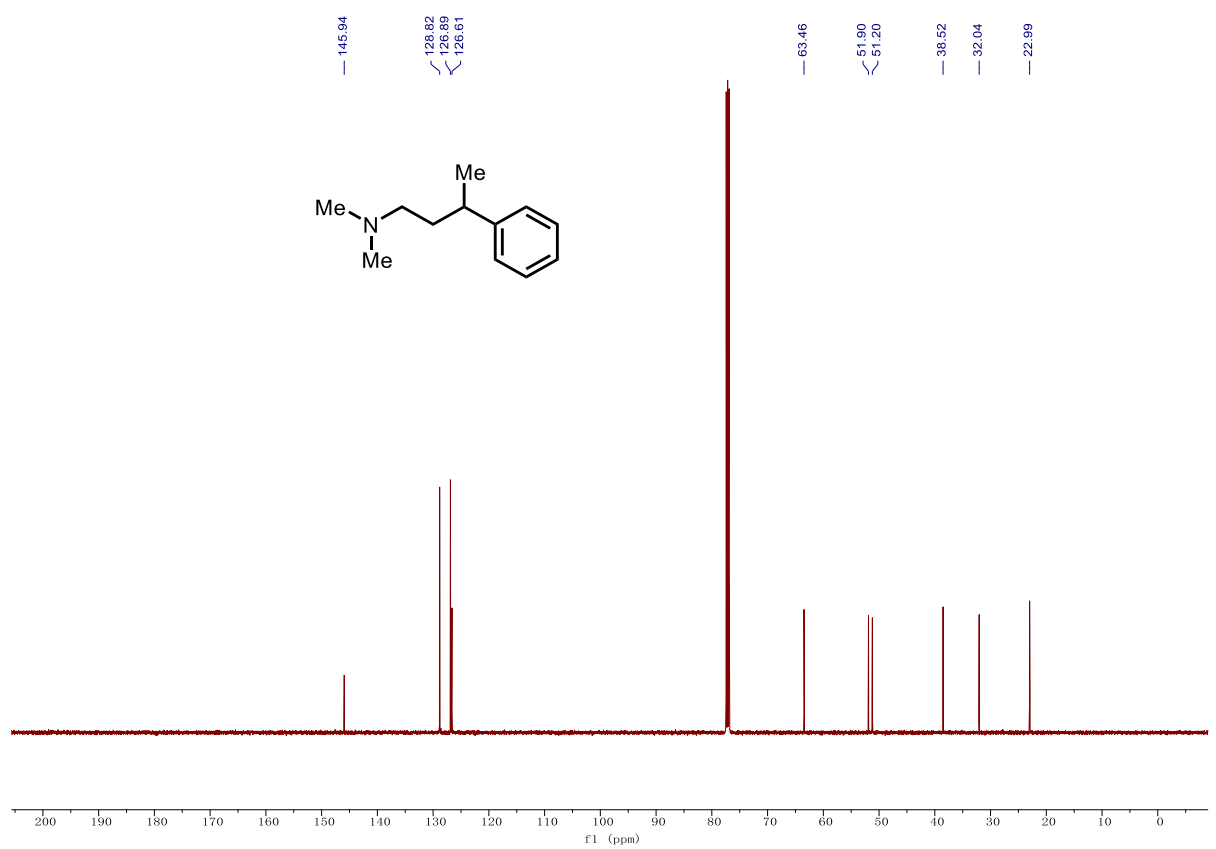



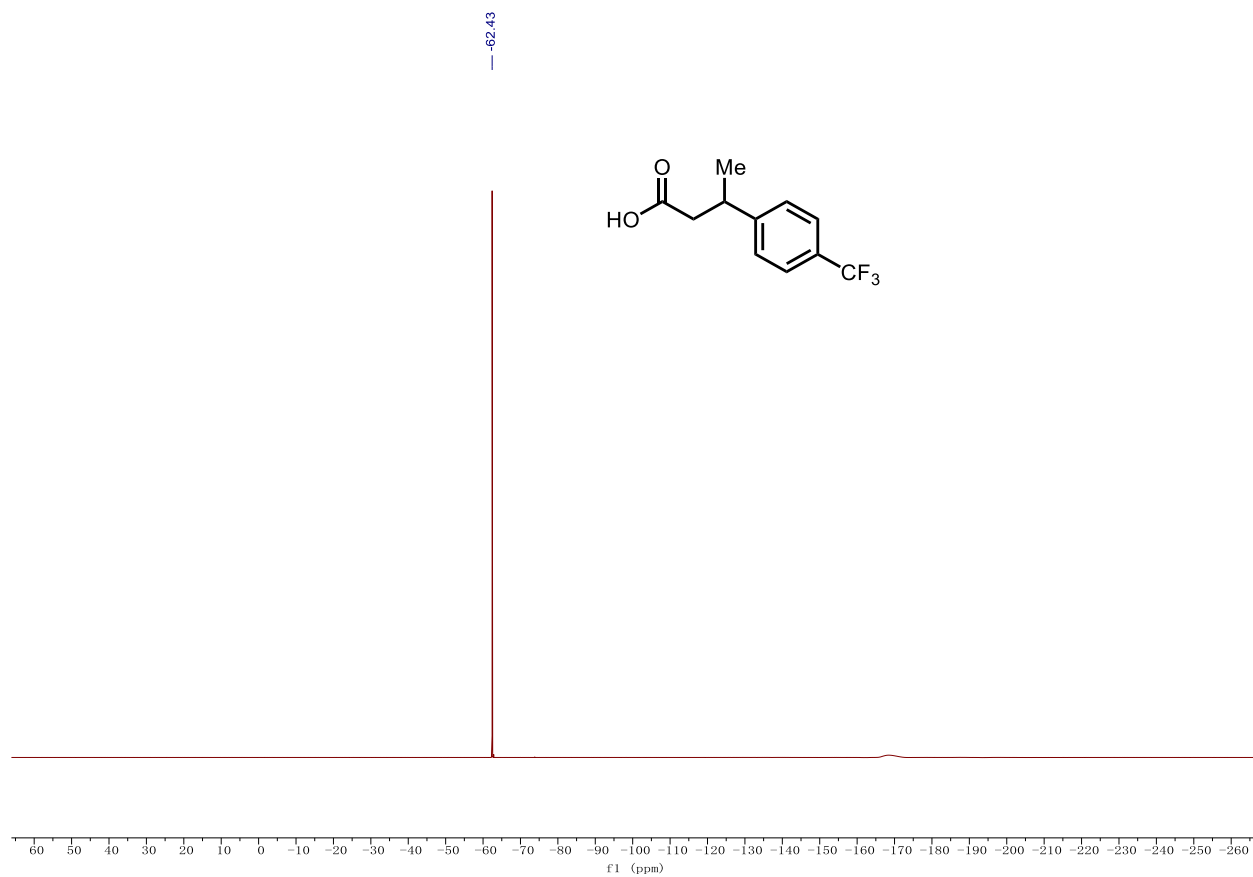

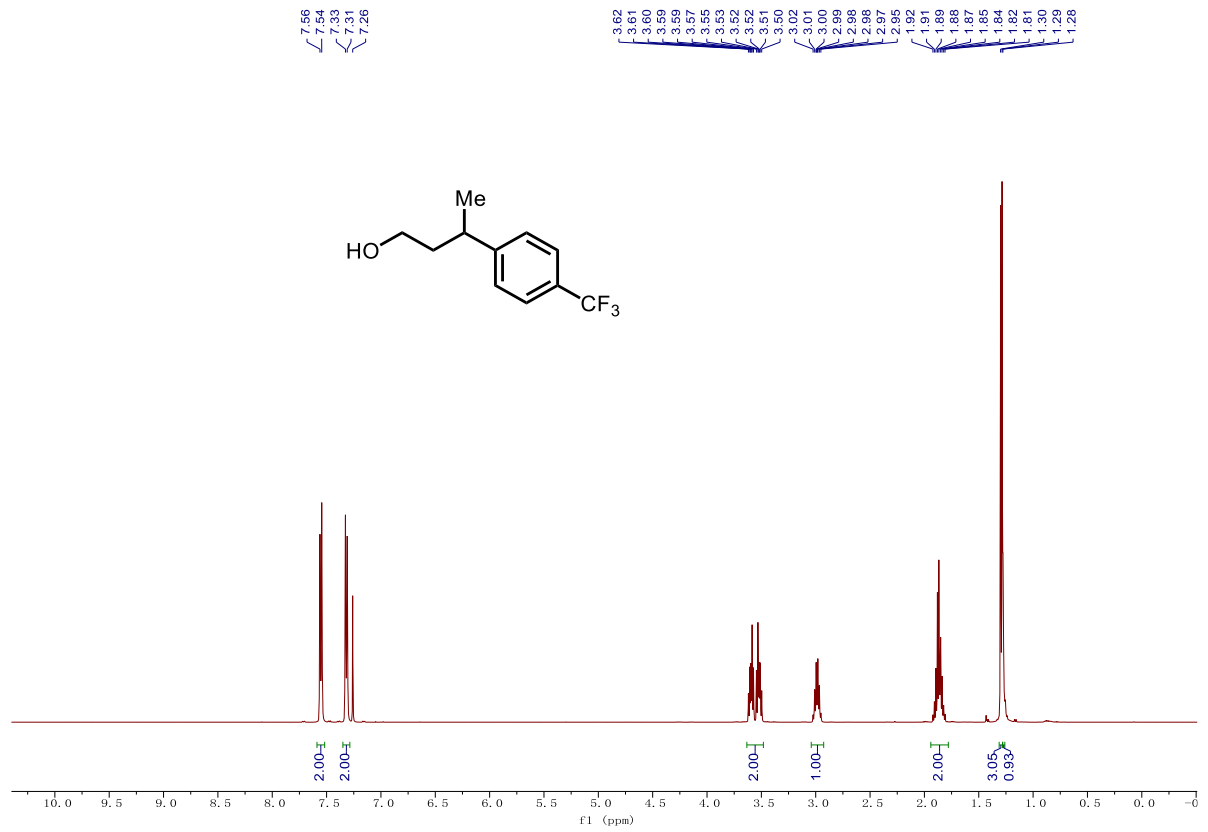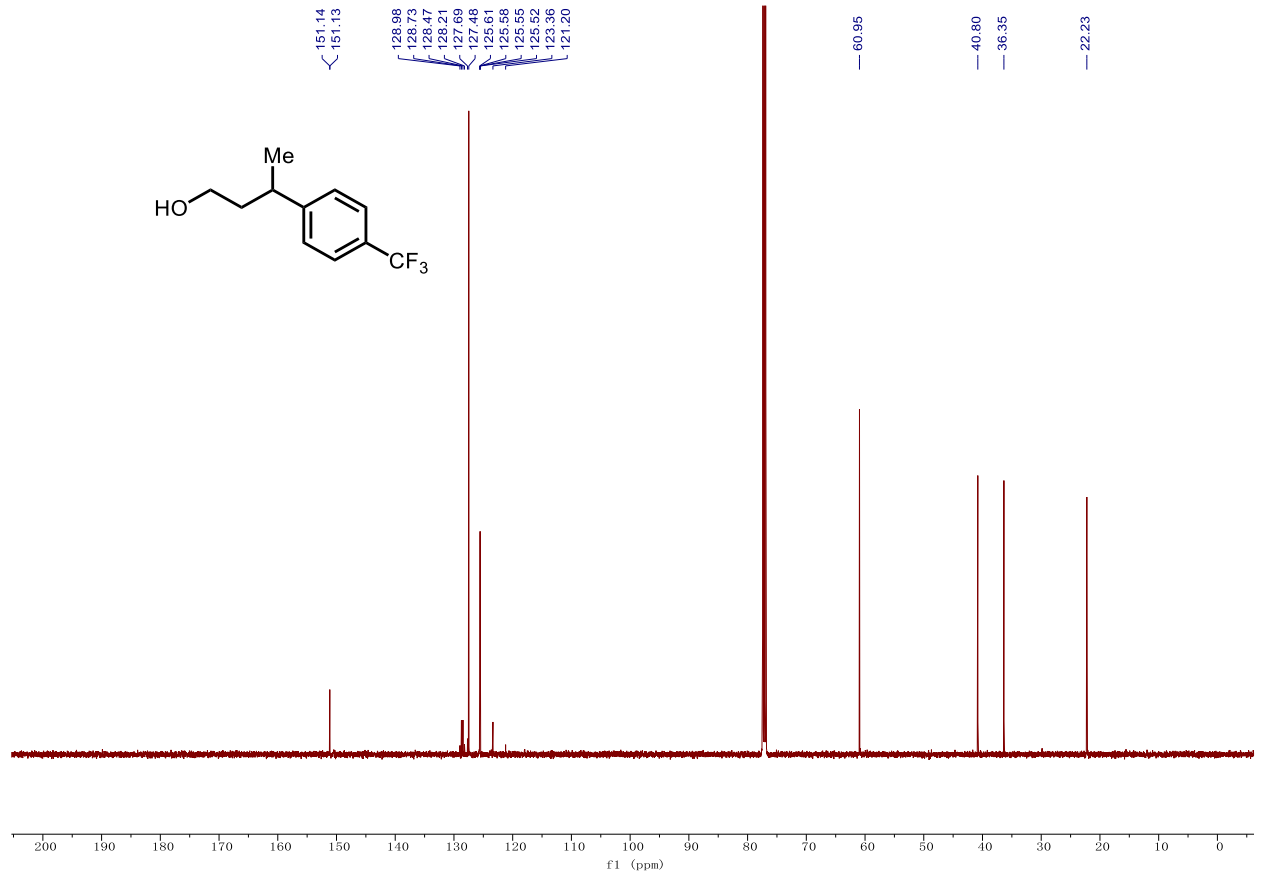

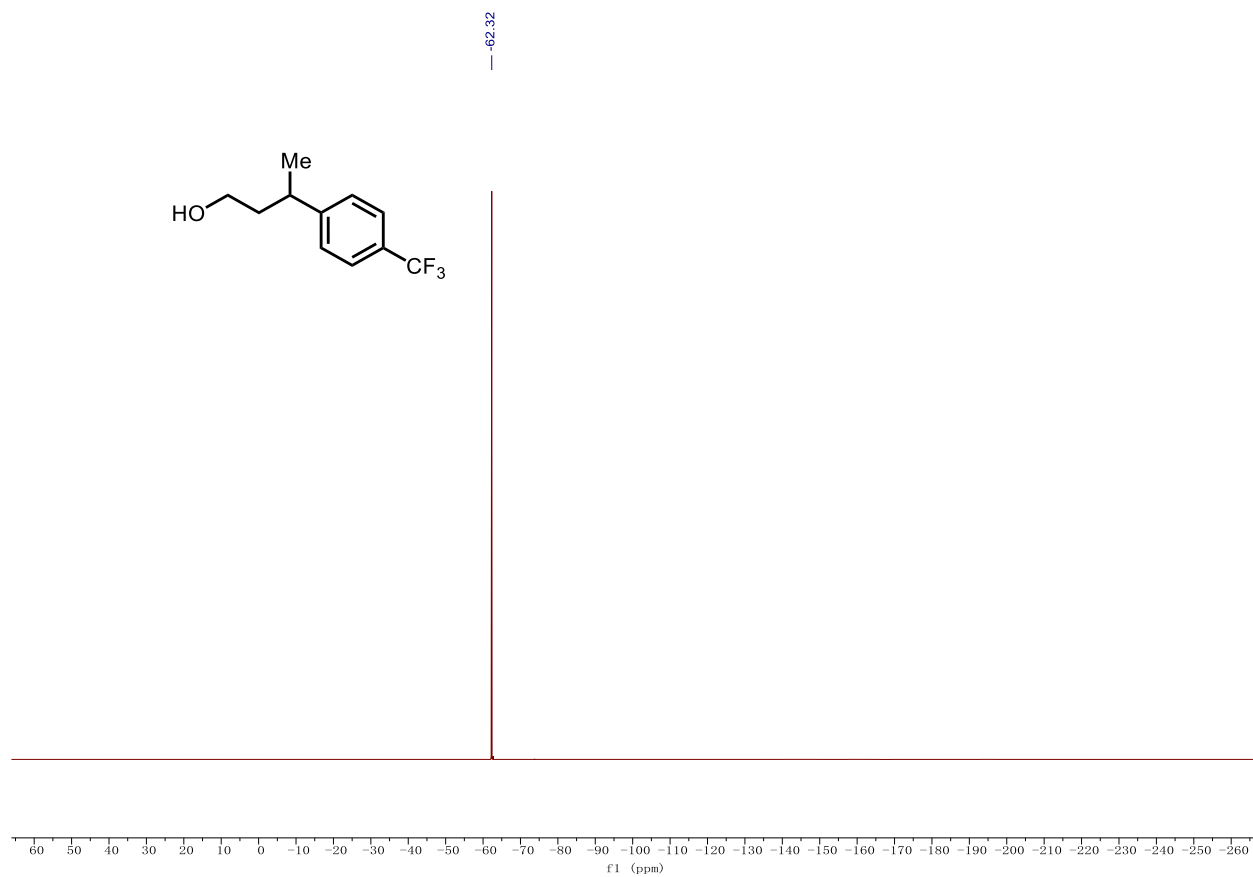



#### 4. References

1. Gibson, D. G. *et al.* Enzymatic assembly of DNA molecules up to several hundred kilobases. *Nat. Methods* **6**, 343–345 (2009).
2. Black, M. J. *et al.* Asymmetric redox-neutral radical cyclization catalysed by flavin-dependent ‘ene’-reductases. *Nat. Chem.* **12**, 71–75 (2020).
3. Biegasiewicz, K. F. *et al.* Photoexcitation of flavoenzymes enables a stereoselective radical cyclization. *Science* **364**, 1166–1169 (2019).
4. Fu, H. *et al.* ground-state electron transfer as an initiation mechanism for biocatalytic C-C bond forming reactions. *J. Am. Chem. Soc.* **143**, 9622–9629 (2021).
5. Yan, X. & Harutyunyan, S. R. Catalytic enantioselective addition of organometallics to unprotected carboxylic acids. *Nat. Commun.*, **10**, 3402 (2019).
6. Hu, S. B., Chen, Z. P., Zhou, J. & Zhou, Y. G. Electronically deficient (R<sub>ax</sub>,S,S)-F<sub>12</sub>-C<sub>3</sub>-TunePhos and its applications in asymmetric 1,4-addition reactions. *Tetrahedron Lett.* **57**, 1925–1929 (2016).
7. Link, A., Zhou, Y. & Buchwald, S. L. CuH-catalyzed asymmetric reductive amidation of  $\alpha,\beta$ -unsaturated carboxylic acids. *Org. Lett.* **22**, 5666–5670 (2020).
8. Guo, S., Wang, X. & Zhou, J. S. Asymmetric umpolung hydrogenation and deuteration of alkenes catalyzed by nickel. *Org. Lett.* **22**, 1204–1207 (2020).
9. Kabsch, W. XDS. *Acta Crystallogr. D Biol. Crystallogr* **66**, 125–132 (2010).
10. Evans, P. R. & Murshudov, G. N. How good are my data and what is the resolution? *Acta Crystallogr. D Biol. Crystallogr.* **69**, 1204–1214 (2013).
11. McCoy, A. J. *et al.* Phaser crystallographic software. *J. Appl. Crystallogr.* **40**, 658–674 (2007).
12. Murshudov, G. N., Vagin, A. A. & Dodson, E. J. Refinement of macromolecular structures by the maximum-likelihood method. *Acta Crystallogr. D Biol. Crystallogr.* **53**, 240–255 (1997).
13. Trott, O. & Olson, A. J. AutoDock Vina: Improving the speed and accuracy of docking with a new scoring function, efficient optimization, and multithreading. *J. Comput. Chem.* **31**, 455–461 (2010).
14. Tan, A. *et al.* Design, synthesis and evaluation of new indolylpyrimidylpiperazines for gastrointestinal cancer therapy. *Molecules* **24**, 3661 (2019).
15. Touti, F., Maurin, P. & Hasserodt, J. A tetrakis(tetrazolyl) analogue of EDTA. *Eur. J. Org. Chem.* **2009**, 1495–1498 (2009).
16. Page, C. G. *et al.* Quaternary charge-transfer complex enables photoenzymatic intermolecular hydroalkylation of olefins. *J. Am. Chem. Soc.* **143**, 97–102 (2020).

17. Patel, M. R. *et al.* Discovery and structure–activity relationship of novel 2,3-dihydrobenzofuran-7-carboxamide and 2,3-dihydrobenzofuran-3(2H)-one-7-carboxamide derivatives as poly(ADP-ribose)polymerase-1 inhibitors. *J. Med. Chem.* **57**, 5579–5601 (2014).
18. Tsukanov, S. V. *et al.* Continuous platform to generate nitroalkanes on-demand (in situ) using peracetic acid-mediated oxidation in a PFA pipes-in-series reactor. *Org. Process Res. Dev.* **22**, 971–977 (2018).
19. Brals, J., Smith, J. D., Ibrahim, F., Gallou, F. & Handa, S. Micelle-enabled palladium catalysis for convenient sp<sup>2</sup>-sp<sup>3</sup> coupling of nitroalkanes with aryl bromides in water under mild conditions. *ACS Catal.* **7**, 7245–7250 (2017).
20. Xu, J., Li, X., Wu, J. & Dai, W. M. Synthesis of 5-alkyl-5-aryl- $\gamma$ -lactams from 1-aryl-substituted nitroalkanes and methyl acrylate via Michael addition and reductive lactamization. *Tetrahedron* **70**, 3839–3846 (2014).
21. Matviitsuk, A. *et al.* Unanticipated silyl transfer in enantioselective  $\alpha,\beta$ -unsaturated acyl ammonium catalysis using silyl nitronates. *Org. Lett.* **22**, 335–339 (2019).
22. Vogl, E. M. & Buchwald, S. L. Palladium-catalyzed monoarylation of nitroalkanes. *J. Org. Chem.* **67**, 106–111 (2002).
23. Andrade, M. M., Barros, M. T. & Pinto, R. C. Exploiting microwave-assisted neat procedures: synthesis of N-aryl and N-alkylnitrones and their cycloaddition en route for isoxazolidines. *Tetrahedron* **64**, 10521–10530 (2008).
24. Oi, S., Taira, A., Honma, Y., Sato, T. & Inoue, Y. Asymmetric 1,4-addition of aryltrialkoxysilanes to  $\alpha,\beta$ -unsaturated esters and amides catalyzed by a chiral rhodium complex. *Tetrahedron: Asymmetry* **17**, 598–602 (2006).
25. Cosgrove, S. C., Plane, J. M. C. & Marsden, S. P. Radical-mediated direct C–H amination of arenes with secondary amines. *Chem. Sci.* **9**, 6647–6652 (2018).
26. Ryoh Itooka, Yuki Iguchi, and & Miyaura, N. Rhodium-catalyzed 1,4-addition of arylboronic acids to  $\alpha,\beta$ -unsaturated carbonyl compounds: large accelerating effects of bases and ligands. *J. Org. Chem.* **68**, 6000–6004 (2003).
27. Guan, L.-P. *et al.* N-palmitoylethanolamide derivatives: synthesis and studies on anticonvulsant and antidepressant activities. *Med. Chem. Res.* **20**, 601–606 (2011).
28. Yamashita, Y., Noguchi, A., Fushimi, S., Hatanaka, M. & Kobayashi, S. Chiral metal salts as ligands for catalytic asymmetric mannich reactions with simple amides. *J. Am. Chem. Soc.* **143**, 5598–5604 (2021).
29. Wolff, M. *et al.* Isoprenoid biosynthesis via the methylerythritol phosphate pathway. (E)-4-Hydroxy-3-methylbut-2-enyl diphosphate: chemical synthesis and formation from methylerythritol cyclodiphosphate by a cell-free system from *Escherichia coli*. *Tetrahedron Lett.*

- 43, 2555–2559 (2002).
30. Yakukhnov, S. A. & Ananikov, V. P. Catalytic transfer hydrodebenzylation with low palladium loading. *Adv. Synth. Catal.* **361**, 4781–4789 (2019).
  31. Wang, X. *et al.* Redox-neutral nickel-catalyzed cross-coupling reactions of (homo)allylic alcohols and aryltriflates. *ACS Catal.* **11**, 7319–7326 (2021).
  32. Frisch, M.J. *et al.* , Gaussian 16, revision C.01 (Gaussian, Inc., 2016).
  33. Chai, J. Da & Head-Gordon, M. Long-range corrected hybrid density functionals with damped atom–atom dispersion corrections. *Phys. Chem. Chem. Phys.* **10**, 6615–6620 (2008).
  34. Pascual-ahuir, J. L., Silla, E. & Tuñon, I. GEPOL: An improved description of molecular surfaces. III. A new algorithm for the computation of a solvent-excluding surface. *J. Comput. Chem.* **15**, 1127–1138 (1994).
  35. Miertuš, S., Scrocco, E. & Tomasi, J. Electrostatic interaction of a solute with a continuum. A direct utilizaion of AB initio molecular potentials for the prevision of solvent effects. *Chem. Phys.* **55**, 117–129 (1981).
  36. Miertuš, S. & Tomasi, J. Approximate evaluations of the electrostatic free energy and internal energy changes in solution processes. *Chem. Phys.* **65**, 239–245 (1982).
  37. CYLview20; Legault, C. Y., Université de Sherbrooke, 2020 (<http://www.cylview.org>).
  38. Matthews, A. *et al.* Aminoperoxide adducts expand the catalytic repertoire of flavin monooxygenases. *Nat. Chem. Biol.* **16**, 556–563 (2020).
  39. Breugst, M., Eschenmoser, A. & Houk, K. N. Theoretical exploration of the mechanism of riboflavin formation from 6,7-dimethyl-8-ribityllumazine: Nucleophilic catalysis, hydride transfer, hydrogen atom transfer, or nucleophilic addition? *J. Am. Chem. Soc.* **135**, 6658–6668 (2013).
  40. Massey, V. A simple method for the determination of redox potentials. *Flavins and flavoproteins* **1990**, 59–66, (1991).
  41. Gao, X., Turek-Herman, J. R., Choi, Y. J., Cohen, R. D. & Hyster, T. K. Photoenzymatic synthesis of  $\alpha$ -tertiary amines by engineered flavin-dependent ‘ene’-reductases. *J. Am. Chem. Soc.* **143**, 19643–19647 (2021).
